# Supplementary material for: Components and Delivery Formats of Cognitive Behavioral Therapy for Chronic Insomnia in Adults: A Systematic Review and Component Network Meta-Analysis
Source: PubMed Central journal article supplement (PMC10794978; doi:10.1001/jamapsychiatry.2023.5060), 2024-01-17
Supplement: jamapsychiatry-e235060-s001.pdf [file jamapsychiatry-e235060-s001.pdf]

## Supplemental Online Content

Furukawa Y, Sakata M, Yamamoto R, et al. Components and delivery formats of cognitive behavioral therapy for chronic insomnia in adults: a systematic review and component network meta-analysis. *JAMA Psychiatry*. Published online January 17, 2024.  
doi:10.1001/jamapsychiatry.2023.5060

**eMethods 1.** Protocol

**eMethods 2.** Lists of excluded and included studies

**eMethods 3.** Examination of the imputation method

**eMethods 4.** The revised Cochrane risk of bias

**eMethods 5.** Assessment of inconsistency for the primary outcome

**eTable 1.** Components and delivery formats that are included in CBT

**eTable 2.** Characteristics of included trials

**eTable 3.** Evaluation of components

**eTable 4.** League table for treatment-level network meta-analysis

**eTable 5.** CINeMA

**eTable 6.** PRISMA-NMA

**eFigure 1.** Screening process and results

**eFigure 2.** Assessment of transitivity

**eFigure 3.** Prediction intervals

**eFigure 4.** Assessment of publication bias and small study effects

**eFigure 5.** Network diagram

**eFigure 6.** The colouring scheme of the results

**eFigure 7.** Sensitivity analyses

**eFigure 8.** Subgroup analyses

This supplemental material has been provided by the authors to give readers additional information about their work.

## Table of Contents

### eMethods 1. Protocol

- 1.1. Protocol as of 25 May, 2022
- 1.2. Changes from the protocol
- 1.3. List of all variables for which data were sought
- 1.4. Additive component network meta-analysis model

### eMethods 2. Lists of excluded and included studies

- 2.1. List of the excluded studies with reasons (examples)
- 2.2. List of the ongoing trials and the terminated/withdrawn trials
  - 2.2.1. List of the ongoing trials
  - 2.2.2. List of the terminated/withdrawn trials
- 2.3. List of the included trials

### eMethods 3. Examination of the imputation method

### eMethods 4. The revised Cochrane risk of bias

- 4.1. Risk of Bias 2 interpretation
- 4.2. The inter-rater reliability of the assessment of risk of bias
- 4.3. Risk of Bias 2 of each trial

### eMethods 5. Assessment of inconsistency for the primary outcome

### eTable 1. Components and delivery formats that are included in CBT

### eTable 2. Characteristics of included trials

### eTable 3. Evaluation of components

- 3.1. Percentage agreement and kappa of components for each arm of included trials
- 3.2. Components of the included trials
- 3.3. Observed combinations of components and delivery formats

### eTable 4. League table for treatment-level network meta-analysis

### eTable 5. CINeMA

### eTable 6. PRISMA-NMA

### eFigure 1. Screening process and results

- 1.1. Flow diagram 2022 initial review
- 1.2. Flow diagram 2023 update

### eFigure 2. Assessment of transitivity

### eFigure 3. Prediction intervals

### eFigure 4. Assessment of publication bias and small study effects

### eFigure 5. Network diagram

### eFigure 6. The colouring scheme of the results

### eFigure 7. Sensitivity analyses

- 7.1. Pre-specified and post-hoc sensitivity analyses
- 7.2. NMA and cNMA using risk difference in comparison with odds ratio
- 7.3. Bayesian model to examine the effects of two-way interactions

### eFigure 8. Subgroup analyses

## eMethods 1. Protocol

We prospectively registered the protocol in PROSPERO ([CRD42022324233](https://doi.org/10.1101/2022.06.02.22275890)) on 10 May 2022. You can find the full text protocol on the preprint server (Furukawa Y, et al. medRxiv. 2022. doi: <https://doi.org/10.1101/2022.06.02.22275890> ) Here we present the protocol as of 25 May, 2022 and the changes.

### 1.1. Protocol as of 25 May, 2022

First draft: 4 March, 2022

Last update before PROSPERO registration: 23 April, 2022

Last updated: 25 May, 2022

#### **Dismantling cognitive-behavioral therapy for chronic insomnia: a protocol for a systematic review and component network meta-analysis**

##### **REVIEW QUESTION**

What is the effect of each component of cognitive behavioral therapy for chronic insomnia?

##### **BACKGROUND**

Insomnia is highly prevalent and disabling.(Roth et al., 2011) Clinical practice guidelines recommend cognitive-behavioral therapy for insomnia (CBTI) as the first-line treatment.(Edinger et al., 2021; Qaseem et al., 2016) CBTI includes various combinations of many different components and its clinical benefits have been shown as a package,(Straten et al., 2018) whereas the effect of each component remains unclear. Finding the effect of each component will lead to an intervention that may maximize treatment benefit while reducing the number of components, thereby reducing the treatment burden, lowering the cost of CBTI and making it available to more people. Component network meta-analysis (CNMA) is an extension of standard network meta-analysis that can be used to disentangle the treatment effects of different components included in multicomponent interventions. (Rücker et al., 2020b) In this study, we will explore the effect of each component of CBTI with the use of CNMA.

##### **METHODS**

We will follow the Preferred Reporting Items for Systematic reviews and Meta-Analyses (PRISMA) guideline extension for NMA. (Hutton et al., 2015) The protocol is prospectively registered in PROSPERO ([CRD42022324233](https://doi.org/10.1101/2022.06.02.22275890)).

##### **Data sources**

##### **Criteria for considering studies for this review**

##### **Study design**

We will include all randomized controlled trials that compared any form of CBTI against another form of CBTI or a control condition in the treatment of adults with chronic insomnia. Cluster randomized trials will be included in meta-analyses in accordance with the Cochrane handbook recommendation. (Higgins et al., 2022) If the intra-cluster correlation coefficient is not clearly reported, we assume it to be 0.05.(Lin et al., 2018)

**Participants**

We will include studies on patients of both genders aged 18 years or older with insomnia either diagnosed according to formal diagnostic criteria (such as the Diagnostic and Statistical Manual of Mental Disorders, the International Classification of Diseases or the International Classification of Sleep Disorders) or judged so by clinical expertise (e.g. presence of significant symptoms). The effect of including studies without a formal diagnosis of insomnia will be tested in a sensitivity analysis. We will include patients with psychiatric or physical comorbidities. (Sateia, 2014) The effect of including such studies will be examined in a sensitivity analysis.

**Interventions and controls**

We regard CBTI broadly as a psychotherapy involving any one of the following cognitive or behavioral components. Table 1 describes the different components of interest and their definitions. Pharmacological co-administration will be allowed as long as it is stated that there were no systematic differences in drug administration between study arms. CBTI that clearly includes active components focusing on other symptoms, such as depression, anxiety or pain, will be excluded.

The control conditions of interest will include waiting list, no treatment, attention/psychological placebo control and treatment as usual. In this CNMA study, treatment as usual must include pharmacotherapy; watchful waiting will be classified as attention/psychological placebo even when it is termed ‘treatment as usual’ in some papers. When no treatment, attention/psychological placebo or treatment as usual are used while on the waiting list, such controls will be regarded as waiting list in the NMA but will be decomposed as appropriate in the CNMA. We will include interventions of any duration.

Where multiple arms are reported in a single trial, we will include only the relevant arms that can be described with the components listed in Table 1. We will lump the arms when they share the same components (e.g. same components delivered in 30 min per session against 60 min per session). We will exclude irrelevant arms such as active-drug, pill-placebo, exercise or bright light therapy with equipment.

Possible components and their combinations are shown in Table 1 and Table 2. The components and nodes were determined based on previous studies (Edinger et al., 2021; Furukawa et al., 2021) and content expert consensus among co-authors (MS, TAF, MP).

**TABLE 1 List of included components and their definitions**

| Intervention                        | Description                                                                                                                                                                                                                                                                                       |
|-------------------------------------|---------------------------------------------------------------------------------------------------------------------------------------------------------------------------------------------------------------------------------------------------------------------------------------------------|
| <b>Educational components (EDU)</b> |                                                                                                                                                                                                                                                                                                   |
| Sleep hygiene education (se)        | General explanation about sleep (eg, sleep biology, characteristics of healthy sleep, changes in sleep patterns with aging, stress biology, and its impact on sleep) and general recommendations about lifestyle (eg, diet, exercise, substance use) and environmental factors (eg, light, noise, |

| <b>Intervention</b>                | <b>Description</b>                                                                                                                                                                                                                                                                                   |
|------------------------------------|------------------------------------------------------------------------------------------------------------------------------------------------------------------------------------------------------------------------------------------------------------------------------------------------------|
|                                    | temperature) to improve sleep. This may include some elements of other components but those should not be the predominant part of the intervention.                                                                                                                                                  |
| Sleep diary (sd)                   | Self-monitoring of important daily sleep-related information using diary.                                                                                                                                                                                                                            |
| <b>Cognitive components (COG)</b>  |                                                                                                                                                                                                                                                                                                      |
| Cognitive restructuring (cr)       | Skills to identify, challenge and change unhelpful beliefs about sleep that may disturb sleep. This may include behavioral experiments.                                                                                                                                                              |
| Mindfulness (mi)                   | A form of meditation emphasizing a nonjudgmental state of heightened or complete awareness of one's thoughts, emotions, or experiences on a moment-to-moment basis.                                                                                                                                  |
| Constructive worry (cw)            | Skills not to worry in bed by writing down the worries and their solutions before going to bed.                                                                                                                                                                                                      |
| Imagery rehearsal (ir)             | Skills to identify, challenge and change nightmares that disturb sleep.                                                                                                                                                                                                                              |
| <b>Behavioral components (BEH)</b> |                                                                                                                                                                                                                                                                                                      |
| Sleep restriction (sr)             | Skills to improve sleep by limiting time in bed. First, time in bed is restricted to the average sleep duration and then it is increased or decreased depending on sleep efficiency.                                                                                                                 |
| Stimulus control (sc)              | Skills to re-associate the bed with sleep. Patients are instructed to; wake up at the same time every morning, refrain from daytime napping, go to bed only when sleepy, get out of bed when unable to sleep, and use the bed/bedroom for sleep and sex only.                                        |
| Relaxation (re)                    | Structured exercises designed to reduce somatic tension (eg, abdominal breathing, progressive muscle relaxation, autogenic training) and cognitive arousal (eg, guided imagery training).                                                                                                            |
| Paradoxical intention (pi)         | Exercise to remain awake as long as possible after getting into bed.                                                                                                                                                                                                                                 |
| <b>Others</b>                      |                                                                                                                                                                                                                                                                                                      |
| Waiting component (w)              | Participants are aware that they can receive an active treatment after a waiting phase. If patients allocated to the waiting list control condition receive some other potentially therapeutic components, we will consider both the waiting component and the therapeutic components to be present. |
| Conventional drug treatment (dt)   | Rated positive when conventional drug treatment is present (drug treatment is part of the protocol treatment) or allowed (we will note the percentage of patients on drug).                                                                                                                          |
| Non-specific treatment effect (ns) | Effect of an intervention due to the patients' belief that they are receiving some form of treatment. Miscellaneous skills not covered in other                                                                                                                                                      |

| Intervention                     | Description                                                                                                                                                                                                                                                                                                                                                                                                                                                     |
|----------------------------------|-----------------------------------------------------------------------------------------------------------------------------------------------------------------------------------------------------------------------------------------------------------------------------------------------------------------------------------------------------------------------------------------------------------------------------------------------------------------|
|                                  | sections and not expected to have large effect (i.e. quasi-desensitization) are classified as having non-specific treatment effect.                                                                                                                                                                                                                                                                                                                             |
| Self-help, unguided, remote (NA) | Default delivery format is self-help, unguided and remote, as it requires the least human resource.                                                                                                                                                                                                                                                                                                                                                             |
| Human encouragement (he)         | Reminders provided by human beings to proceed with the self-help, remote treatment program via telephone or email. This should not contain any support related to the therapeutic contents. Peer support such as discussion group will be regarded as this component. We will code this component separately from interaction with therapists (in, gp, ff) to see if adding human encouragement to self-help, remote interventions good enough to be effective. |
| Therapeutic guidance (tg)        | Therapeutic guidance in addition to self-help, remote interventions. This may be provided on a scheduled basis or as-needed basis. Technical support only is not included. We will code this component separately from interaction with therapists (in, gp, ff) to see if adding therapeutic guidance to self-help, remote interventions good enough to be effective.                                                                                           |
| Individual (in)                  | Individual interaction with therapists. The combination (in + ff) means individual, face-to-face sessions are held. The combination (in – ff) individual remote sessions, such as via telephone or videoconference.                                                                                                                                                                                                                                             |
| Group (gp)                       | Interaction with therapists as a member of a group.                                                                                                                                                                                                                                                                                                                                                                                                             |
| Face-to-face (ff)                | Face-to-face interaction with therapists.                                                                                                                                                                                                                                                                                                                                                                                                                       |
| Automatic encouragement (ae)     | Automated reminders to proceed with the treatment program. This can be added both to the self-help interventions or the interventions including interactions with therapists. This should not contain any support related to the therapeutic contents.                                                                                                                                                                                                          |

**TABLE 2 Conceptualization of cognitive behavioral therapy for insomnia or control conditions from the component perspective**

|                                    | Possible combinations of components                       |
|------------------------------------|-----------------------------------------------------------|
| Cognitive behavioral therapy       | + ns ± EDU + COG + BEH ± dt ± he ± tg ± in ± gp ± ff ± ae |
| Cognitive therapy                  | + ns ± EDU + COG ± dt ± he ± tg ± in ± gp ± ff ± ae       |
| Behavioral therapy                 | + ns ± EDU + BEH ± dt ± he ± tg ± in ± gp ± ff ± ae       |
| Psychoeducation                    | + ns + EDU ± dt ± he ± tg ± in ± gp ± ff ± ae             |
| Waiting list                       | + w ± ns ± EDU ± dt ± he ± tg ± in ± gp ± ff ± ae         |
| Treatment as usual                 | + ns + dt + in + ff                                       |
| Attention or psychological placebo | + ns ± dt ± he ± tg ± in ± gp ± ff ± ae                   |
| No treatment                       | ± ff ± in                                                 |

Components marked with a “+” are required. Components marked with “±” are optional. Components not mentioned cannot be included. Capitalized components (EDU, COG, BEH) mean at least one of the components in that group is required. ae=automatic encouragement. BEH=behavioral components. COG=cognitive components. dt=conventional drug treatment. EDU=educational components. ff=face-to-face. gp=group. he=human encouragement. in=individual. ns=non-specific treatment effect. tg=therapeutic guidance. w=waiting component.

**Search methods for identification of studies**

We will carry out a comprehensive literature search in PubMed, CENTRAL and PsycINFO. We will use a combination of index and free terms of psychological treatments and insomnia with filters (Eady et al., 2008) for randomized clinical trials. We will also search WHO International Clinical Trials Registry Platform. We will impose no date, language or publication status restriction. We will check the reference lists of review articles for additional potentially eligible records.

**TABLE 3 Search strings for PubMed, Cochrane Central Register of Controlled Trials and PsycINFO**

| Database | Search strings                                                                                                                                                                                                                                                                                                                                                                                                                                                                                                                                                                                                                                                                                                                                                                               |
|----------|----------------------------------------------------------------------------------------------------------------------------------------------------------------------------------------------------------------------------------------------------------------------------------------------------------------------------------------------------------------------------------------------------------------------------------------------------------------------------------------------------------------------------------------------------------------------------------------------------------------------------------------------------------------------------------------------------------------------------------------------------------------------------------------------|
| PubMed   | (Psychotherapy [MH] OR psychotherap*[All Fields] OR "cognitive behavioural therapy"[All Fields] OR "cognitive behavioral therapy"[All Fields] OR "CBT"[All Fields] OR "CBTI"[All Fields] OR "CBT-I"[All Fields] OR "cognitive therapy"[All Fields] OR "behavioural therapy"[All Fields] OR "behavioral therapy"[All Fields] OR "sleep hygiene"[All Fields] OR "sleep education"[All Fields] OR "sleep diary"[All Fields] OR "cognitive restructuring"[All Fields] OR "mindfulness"[All Fields] OR "constructive worry"[All Fields] OR "imagery rehearsal"[All Fields] OR "relaxation"[All Fields] OR "sleep restriction"[All Fields] OR "stimulus control"[All Fields] OR "paradoxical intention"[All Fields])<br>AND<br>("sleep wake disorders"[MeSH Terms] OR insomnia[All Fields])<br>AND |

| Database                                            | Search strings                                                                                                                                                                                                                                                                                                                                                                                                                                                                                                                                                                                                                                                                        |
|-----------------------------------------------------|---------------------------------------------------------------------------------------------------------------------------------------------------------------------------------------------------------------------------------------------------------------------------------------------------------------------------------------------------------------------------------------------------------------------------------------------------------------------------------------------------------------------------------------------------------------------------------------------------------------------------------------------------------------------------------------|
|                                                     | (randomized controlled trial[pt] OR controlled clinical trial[pt] OR randomized[tiab] OR placebo[tiab] OR clinical trials as topic[mesh:noexp] OR randomly[tiab] OR trial[ti] NOT (animals[mh] NOT humans [mh]))                                                                                                                                                                                                                                                                                                                                                                                                                                                                      |
| Cochrane Central Register of Controlled Trials      | <p>(([mh Psychotherapy] OR psychotherap* OR "cognitive behavioural therapy" OR "cognitive behavioral therapy" OR "CBT" OR "CBTI" OR "CBT-I" OR "cognitive therapy" OR "behavioural therapy" OR "behavioral therapy" OR "sleep hygiene" OR "sleep education" OR "sleep diary" OR "cognitive restructuring" OR mindfulness OR "constructive worry" OR "imagery rehearsal" OR relaxation OR "sleep restriction" OR "stimulus control" OR "paradoxical intention")</p> <p>AND</p> <p>([mh "sleep wake disorders"] OR insomnia)</p>                                                                                                                                                        |
| PsycINFO                                            | <p>(exp Psychotherapy/ OR psychotherap*.af. OR "cognitive behavioural therapy".af. OR "cognitive behavioral therapy".af. OR "CBT".af. OR "CBTI".af. OR "CBT-I".af. OR "cognitive therapy".af. OR "behavioural therapy".af. OR "behavioral therapy".af. OR "sleep hygiene".af. OR "sleep education".af. OR "sleep diary".af. OR "cognitive restructuring".af. OR mindfulness.af. OR "constructive worry".af. OR "imagery rehearsal".af. OR relaxation.af. OR "sleep restriction".af. OR "stimulus control".af. OR "paradoxical intention".af.)</p> <p>AND</p> <p>(exp "sleep wake disorders"/ OR insomnia.af.)</p> <p>AND</p> <p>("double-blind" OR "random* assigned" OR control)</p> |
| WHO International Clinical Trials Registry Platform | <p>(psychotherap* OR "cognitive behavioural therapy" OR "cognitive behavioral therapy" OR "CBT" OR "CBTI" OR "CBT-I" OR "cognitive therapy" OR "behavioural therapy" OR "behavioral therapy" OR "sleep hygiene" OR "sleep education" OR "sleep diary" OR "cognitive restructuring" OR mindfulness OR "constructive worry" OR "imagery rehearsal" OR relaxation OR "sleep restriction" OR "stimulus control" OR "paradoxical intention")</p> <p>AND</p> <p>("sleep wake disorders" OR insomnia)</p>                                                                                                                                                                                    |

## Data collection and analysis

### Selection of studies

Two review authors will independently screen titles and abstracts of all the potential studies we identify as a result of the search and code them as 'retrieve' or 'do not retrieve'. We will retrieve the full text study reports/publications and two review authors will independently screen the full text and identify studies for inclusion and identify and record reasons for exclusion of the ineligible studies. We will resolve any disagreement through discussion or, if required, we will consult a third reviewer. We will identify publications from the same study so that each study rather than each report is the unit of analysis in the review. We will record the selection process in sufficient detail to complete a PRISMA flow diagram.

### Data items



Two review authors will extract independently data from the included studies. Any disagreement will be resolved through discussion, or discussed with a third person if necessary. We will abstract the following information.

### **1. Characteristics of the studies**

Name of the study, year of publication, country, study site (single or multi-center), study design (individually-randomized or cluster-randomized), population characteristics (mean age, number of women, definition of insomnia, number of patients with primary insomnia), intervention (components, delivery format, qualification of therapists [if applicable], duration), outcomes (scale used for the primary outcome)

### **2. Identification of components**

Two independent reviewers will determine the classification of all identified arms and their components according to the definitions in Table 1, based on all available information including the publications, trial registry and inquiry with the original investigators if needed. Any disagreement will be solved by the two reviewers and, where necessary, in consultation with a third member of the review team. We will report the inter-rater agreement in terms of percentage agreement and kappa.

### **3. Risk of bias**

We will use Cochrane Risk of Bias 2.0 tool (RoB2) (Sterne et al., 2019) to assess the risk of bias of the primary outcome. We will report the inter-rater agreement in terms of percentage agreement and kappa.

### **4. Data to calculate effect sizes**

We will extract data to calculate effect sizes (the number of patients randomized to each arm, the number of patients assessed, the number of remitters, the scale used, the mean, standard deviation and the number assessed for continuous outcomes) When only change from baseline to endpoint is reported for continuous outcomes, we will use it instead of endpoint mean.(Costa et al., 2013)

### **Primary outcome and secondary outcomes**

The primary outcome of interest in this study is treatment efficacy at four weeks post-treatment or at its closest time point. Intention-to-treat analysis will be prioritized whenever available. We will use the number of participants randomized as the denominator for dichotomous outcomes. We will use odds ratio for dichotomous outcomes, mean difference for continuous outcomes expressed in minutes and percent.

1. Efficacy: remission defined as reaching a satisfactory state at endpoint measured by any validated self-reported scale (dichotomous)

Secondary outcomes are as follows;

2. Acceptability: dropouts for any reason (dichotomous)

3. Sleep diary measures (continuous)

3.1. Sleep efficiency (SE, %)

3.2. Total sleep time (TST, min)

3.3. Sleep onset latency (SOL, min)

3.4. Wake after sleep onset (WASO, min)

4. Efficacy at long-term follow-up. (dichotomous, longest follow-up between 3 to 12 months)

### **Hierarchy of outcome measures**

For efficacy, we will prioritize the remission using the Insomnia Severity Index (7 or less points at endpoint) (Morin et al., 2011) and its imputed number. If it is not reported, we will use the following scales in this order: the remission using the Functional Outcomes of Sleep Questionnaire-10 (18 or more points at endpoint) (Weaver et al., 2007), and then its imputed number; remission using the Epworth Sleepiness Scale (10 or less points at endpoint) (Johns, 1990), and then its imputed number; remission using the Pittsburgh Sleep Quality Index (5 or less points at endpoint) (Cole et al., 2006), and then its imputed number; remission using the Athens Insomnia Scale (5 or less points at endpoint) (Okajima et al., 2020), and then its imputed number; remission using any other validated self-reported scales; remission using sleep diary measures (both SOL and WASO less than 30 minutes at endpoint. When SOL and WASO are reported only separately, we will prioritize WASO. When only SOL is reported, we will use SOL.) (Edinger et al., 2009; Medicine, 2014) and its imputed number.

When any of the measure is reported using another definition of remission than stated above, we will use the definition stated by the authors. When any of the measure is reported only in continuous values, we will impute remission using mean and standard deviation. We will test the validity of this imputation method using studies that report the outcome both in continuous and dichotomous manner. When any of the measure is reported only in standardized mean difference, we will convert it into odds ratio using a validated method. (Chinn, 2000)

### **Statistical analysis**

We will perform the analysis in *R* (latest version, R foundation, Vienna, Austria) (R Core Team, 2020) using *netmeta* (latest version) package (Rücker et al., 2020a) to conduct component network meta-analysis and *meta* (latest version) package (Balduzzi et al., 2019) to synthesize the outcomes in placebo arms and to assess the publication bias.

We will first perform a network meta-analysis lumping arms that include both cognitive and behavioral components as “cognitive-behavioral therapy,” those that involve cognitive but not behavioral components as “cognitive therapy” and those that involve behavioral but not cognitive components as “behavioral therapy” to gain a first insight of the relative treatment effects. (Table 2) We will examine the transitivity assumption by creating a table of important trial and patient characteristics to see if potential effect modifiers (publication year, proportion of patients with primary insomnia, age) are similarly distributed among comparisons. We will check the consistency of the network using local and global inconsistency tests.

Then we will perform component-level network meta-analysis. We will use a model that assumes additivity of components, i.e. assuming that the effect of combination therapy is the sum of the effects of its components. Given the expected clinical and methodological heterogeneity of treatment effects among the studies, we will use the random-effects model.

### **Certainty of evidence**

We will assess the certainty of evidence in network estimates of the primary outcome using CINeMA. (Nikolakopoulou et al., 2020)

### **Publication bias**

We will assess the presence of small study effects, including publication bias, in the evidence set by examining asymmetry in the contour-enhanced funnel plots of all active interventions (CBT, CT, BT) vs control condition (psychoeducation, waiting list, treatment as usual, attention or psychological placebo, no treatment) using the primary outcome.

### **Sensitivity analyses**

1. Excluding studies without formal diagnosis of insomnia
2. Excluding studies focusing on patients with comorbidities (both physical and psychological)
3. Excluding studies with overall high dropout rate (20% or more)
4. Excluding studies at high overall risk of bias
5. Using completer-set analysis (dichotomous)

### **Patient and public involvement**

There was no patient or public involvement in the development of this manuscript.

### **Acknowledgements**

The views expressed are those of the authors and not necessarily those of affiliated organizations.

### **Registration**

This protocol is prospectively registered in PROSPERO (CRD42022324233).

This research was prospectively registered (#2022033Nle), Ethical Committee, Faculty of Medicine, The University of Tokyo.

### **Changes from the protocol (since the first registration on PROSPERO)**

25th May, 2022 (during screening, before data extraction). Although we stated in the protocol that "CBTI that clearly includes active components focusing on other symptoms, such as depression, anxiety or pain, will be excluded," in case the same intervention component was included in both arms, we decided to include the trial, as we will be able to see the additional benefit of CBTI.

### **Support**

No financial support was used.

### **Declarations of interest**

YF has received consultancy fee from Panasonic outside the submitted work.

MS reports personal fees from SONY outside the submitted work.

SF has a research grant from JSPS KAKENHI Grant Number JP 20K18964 and the KDDI Foundation.

SK has a research grant from Mental Health Okamoto Memorial Foundation and Fujiwara Memorial Foundation.

TAF reports grants and personal fees from Mitsubishi-Tanabe, personal fees from SONY, grants and personal fees from Shionogi, outside the submitted work; In addition, TAF has a patent 2020-548587 concerning smartphone CBT apps pending, and intellectual properties for Kokoro-app licensed to Mitsubishi-Tanabe. EGO has received research and consultancy fees from Angelini Pharma. EGO is supported by the National Institute for Health Research (NIHR) Research Professorship to Professor Andrea Cipriani (grant RP-2017-08-ST2-006), by the National Institute for Health Research (NIHR) Applied Research Collaboration (ARC) Oxford and Thames Valley, by the National Institute for Health Research (NIHR) Oxford cognitive health Clinical Research Facility and by the NIHR Oxford Health Biomedical Research Centre (grant BRC-1215-20005)

OE was supported by the Swiss National Science Foundation (Ambizione grant number 180083)

MP reports no competing interest.

## REFERENCE

- American Academy of Sleep Medicine. 2014. International Classification of Sleep Disorders.
- Balduzzi S, Rücker G, Schwarzer G. How to perform a meta-analysis with R: a practical tutorial. *Évid Based Ment Heal* 2019;22:153.
- Chinn S. A simple method for converting an odds ratio to effect size for use in meta-analysis. *Stat Med*. 2000;19:3127–31.
- Cole JC, Motivala SJ, Buysse DJ, et al. Validation of a 3-Factor Scoring Model for the Pittsburgh Sleep Quality Index in Older Adults. *Sleep* 2006;29:112–6.
- Costa BR da, Nüesch E, Rutjes AW, et al. Combining follow-up and change data is valid in meta-analyses of continuous outcomes: a meta-epidemiological study. *J Clin Epidemiol* 2013;66:847–55.
- Eady AM, Wilczynski NL, Haynes RB. PsycINFO search strategies identified methodologically sound therapy studies and review articles for use by clinicians and researchers. *J Clin Epidemiol*. 2008;61:34–40.
- Edinger JD, Arnedt JT, Bertisch SM, et al. Behavioral and psychological treatments for chronic insomnia disorder in adults: an American Academy of Sleep Medicine clinical practice guideline. *J Clin Sleep Med*. 2021;17:255–62.
- Edinger JD, Olsen MK, Stechuchak KM, et al. Cognitive Behavioral Therapy for Patients with Primary Insomnia or Insomnia Associated Predominantly with Mixed Psychiatric Disorders: a Randomized Clinical Trial. *Sleep*. 2009;32:499–510.
- Furukawa TA, Suganuma A, Ostinelli EG, et al. Dismantling, optimising, and personalising internet cognitive behavioural therapy for depression: a systematic review and component network meta-analysis using individual participant data. *Lancet Psychiatry*. 2021;8:500–11.
- Higgins J, Eldridge S, Li T. Chapter 23: Including variants on randomized trials. In: Higgins J, Eldridge S, Li T, editors. *Cochrane Handbook for Systematic Reviews of Interventions* version 6.3, 2022.
- Hutton B, Salanti G, Caldwell DM, et al. The PRISMA Extension Statement for Reporting of Systematic Reviews Incorporating Network Meta-analyses of Health Care Interventions: Checklist and Explanations.

*Ann Intern Med.* 2015;162:777–84.

- Johns MW. A New Method for Measuring Daytime Sleepiness: The Epworth Sleepiness Scale. *Sleep.* 1990;14:540–5.
- Lin C-Y, Strong C, Scott AJ, et al. A cluster randomized controlled trial of a theory-based sleep hygiene intervention for adolescents. *Sleep.* 2018;41.
- Morin CM, Belleville G, Bélanger L, Ivers H. The Insomnia Severity Index: Psychometric Indicators to Detect Insomnia Cases and Evaluate Treatment Response. *Sleep.* 2011;34:601–8.
- Nikolakopoulou A, Higgins JPT, Papakonstantinou T, et al. CINeMA: An approach for assessing confidence in the results of a network meta-analysis. *Plos Med.* 2020;17:e1003082.
- Okajima I, Miyamoto T, Ubara A, et al. Evaluation of Severity Levels of the Athens Insomnia Scale Based on the Criterion of Insomnia Severity Index. *Int J Environ Res Pu.* 2020;17:8789.
- Qaseem A, Kansagara D, Forcica MA, et al. Management of Chronic Insomnia Disorder in Adults: A Clinical Practice Guideline From the American College of Physicians. *Ann Intern Med.* 2016;165:125.
- R Core Team. R: A language and environment for statistical computing. R Foundation for Statistical Computing. 2020.
- Roth T, Coulouvrat C, Hajak G, et al. Prevalence and Perceived Health Associated with Insomnia Based on DSM-IV-TR; International Statistical Classification of Diseases and Related Health Problems, Tenth Revision; and Research Diagnostic Criteria/International Classification of Sleep Disorders, Second Edition Criteria: Results from the America Insomnia Survey. *Biol Psychiat.* 2011;69:592–600.
- Rücker G, Krahn U, König J, et al. netmeta: Network Meta-Analysis using Frequentist Methods. 2020a.
- Rücker G, Petropoulou M, Schwarzer G. Network meta-analysis of multicomponent interventions. *Biometrical J Biometrische Zeitschrift* 2020b;62:808–21.
- Sateia MJ. International Classification of Sleep Disorders-Third Edition. *Chest.* 2014;146:1387–94.
- Sterne JA, Savović J, Page MJ, et al. RoB 2: a revised tool for assessing risk of bias in randomised trials. *BMJ.* 2019;366:l4898.
- Van Straten A, van der Zweerde T, Kleiboer A, et al. Cognitive and behavioral therapies in the treatment of insomnia: A meta-analysis. *Sleep Med Rev.* 2018;38:3–16.
- Weaver TE, Maislin G, Dinges DF, et al. Relationship Between Hours of CPAP Use and Achieving Normal Levels of Sleepiness and Daily Functioning. *Sleep.* 2007;30:711–9.

## 1.2. Changes from the protocol.

25th May 2022 During screening, before data extraction. Although we stated in the protocol that "CBTI that clearly includes active components focusing on other symptoms, such as depression, anxiety or pain, will be excluded," in case the same intervention component was included in both arms, we decided to include the trial, as we would be able to see the additional benefit of CBTI.

4th August 2022. During screening, before data extraction, we decided to add "acceptance and commitment therapy" as eligible components. We decided to lump "acceptance and commitment therapy" together with the "mindfulness" component and call them "third-wave components". We decided to exclude "imagery rehearsal" because it was primarily examined among PTSD patients and including this element would violate the transitivity assumption, which is critical for conducting network meta-analysis.

6th September 2022. During screening, before data extraction, we decided to use the Sleep Condition Indicator (remission: 17 or more points at endpoint) as an outcome measure and prioritise it next to ISI.

5th January 2023. During data extraction trial, we noticed that using the post-treatment time point allows for a clearer distinction from the long-term effect than using the 4-week post-treatment time point. We therefore decided to use the post-treatment time point for the primary outcome.

10th March 2023. We decided to use the baseline severity to test the transitivity assumption in addition to publication year, proportion of patients with primary insomnia and age.

18th March 2023. We decided not to conduct completer set analysis because such information was often not available.

19th April 2023. We decided to use 85% or more as the remission threshold for sleep efficiency.

19th April 2023. We noticed that we classified the relaxation technique as a behavioural component and thus relaxation without sleep restriction/stimulus control/paradoxical intention was classified as BT, which is clinically unreasonable. We thus added relaxation therapy (RT) as a node in the treatment-level network.

23rd April 2023. We decided to conduct additional sensitivity analyses 1) focusing on trials using ISI as the outcome measure to see the influence of choice of measurements; 2) excluding delivery format components (ind, gp, ff, ae, he) to see the influence of extracting delivery methods as components; 3) treating insomnia severity as a continuous value instead of a binary outcome to examine the influence of dichotomizing the outcome; and 4) excluding arms with less than 10 participants to see the influence of small study effects.

16th August 2023. We performed a Bayesian cNMA with penalizing regression to examine the possible two-way interactions, and subgroup analyses to examine whether certain subgroups respond differently.

5<sup>th</sup> October 2023. We performed sensitivity analyses using risk difference as the summary measure. We also performed a sensitivity analysis excluding inactive arms.

### 1.3. List of all variables for which data were sought

| variable           | description                                                                                                                                                                                                                                                                                                     |
|--------------------|-----------------------------------------------------------------------------------------------------------------------------------------------------------------------------------------------------------------------------------------------------------------------------------------------------------------|
| Year               | Publication year of the primary report. If only the results from registry were available, we used the date when the results were posted.                                                                                                                                                                        |
| Ind_clu            | Unit of randomization. Individual or cluster.                                                                                                                                                                                                                                                                   |
| ICC_for_cRCT       | If it was a cluster RCT, we extracted Intra-cluster Correlation Coefficient. If it was not clearly stated, use "0.05".                                                                                                                                                                                          |
| Country            | Countries where the trial took place.                                                                                                                                                                                                                                                                           |
| Single_multi       | Whether the recruitment took place at a single or multi centers.                                                                                                                                                                                                                                                |
| Age_mean           | Mean age of the patients in the arm                                                                                                                                                                                                                                                                             |
| Age_sd             | Standard deviation of the age.                                                                                                                                                                                                                                                                                  |
| Age_n              | The number of patients used for calculating Age_mean.                                                                                                                                                                                                                                                           |
| F_n                | Number of females in the arm                                                                                                                                                                                                                                                                                    |
| Hyp_n              | Number of patients using hypnotics. If the drug treatment was part of the protocol treatment, "Hyp_n" was equal to "n" (all the participants). If the drug treatment was not part of the protocol treatment but just allowed, we used the number at baseline. We prioritised prescribed drugs to OTC drugs.     |
| Insomnia diagnosis | If more than one formal diagnostic criteria were mentioned, prioritise DSM, ICSD and then ICD.<br>1. formal_DSM<br>1. formal_ICSD<br>1. formal_ICD<br>1. formal_Edinger2004<br>2. informal_ISI<br>2. informal_SCI<br>2. informal_PSQI<br>2. informal_AIS<br>2. informal_other_self_reported_scales<br>3. others |
| Primary insomnia_n | The number of primary insomnia (insomnia without comorbidities) patients in the arm.<br>0. primary_insomnia<br>1. primary_secondary_mixed                                                                                                                                                                       |
| Comorbidities      | 2. psy_MDD<br>2. psy_anxiety<br>2. psy_PTSD                                                                                                                                                                                                                                                                     |



| variable               | description                                                                                                                                                                                                                                                                                           |
|------------------------|-------------------------------------------------------------------------------------------------------------------------------------------------------------------------------------------------------------------------------------------------------------------------------------------------------|
|                        | 2. psy_schizophrenia_or_psychosis                                                                                                                                                                                                                                                                     |
|                        | 2. psy_bipolar                                                                                                                                                                                                                                                                                        |
|                        | 2. psy_substance_dependence                                                                                                                                                                                                                                                                           |
|                        | 2. psy_others                                                                                                                                                                                                                                                                                         |
|                        | 2. psy_mixed                                                                                                                                                                                                                                                                                          |
|                        | 3. phy_dialysis                                                                                                                                                                                                                                                                                       |
|                        | 3. phy_heart_failure                                                                                                                                                                                                                                                                                  |
|                        | 3. phy_diabetes                                                                                                                                                                                                                                                                                       |
|                        | 3. phy_fibromyalgia                                                                                                                                                                                                                                                                                   |
|                        | 3. phy_cancer                                                                                                                                                                                                                                                                                         |
|                        | 3. phy_steroid                                                                                                                                                                                                                                                                                        |
|                        | 3. phy_pregnancy_perinatal                                                                                                                                                                                                                                                                            |
|                        | 3. phy_menopause                                                                                                                                                                                                                                                                                      |
|                        | 3. phy_others                                                                                                                                                                                                                                                                                         |
|                        | 3. phy_mixed                                                                                                                                                                                                                                                                                          |
|                        | 4. psy_phy_mixed                                                                                                                                                                                                                                                                                      |
| n                      | The number of patients <b>randomized</b> to the arm.                                                                                                                                                                                                                                                  |
| remission              | The number of patients achieving remission at post-treatment or at its closest time point. If equidistant, we used the longer timeframe. (dichotomous)                                                                                                                                                |
| def_remission_response | Definition of remission..                                                                                                                                                                                                                                                                             |
| scale used             | The scale used for the definition of remission. Prioritize; ISI > SCI > FOSQ > ESS > PSQI > AIS > other_self_reported_scales > WASO_SOL > WASO > SOL. We will use the definition stated by the author. Note that we used sleep diary measures (subjective), not polysomnography measures (objective). |
| Severity_bl_mean       | Mean severity measured at baseline.                                                                                                                                                                                                                                                                   |
| Severity_bl_sd         | Standard deviation of the above.                                                                                                                                                                                                                                                                      |
| Severity_bl_n          | The number of patients measured their severity at baseline.                                                                                                                                                                                                                                           |
| Severity_ch_mean       | Extracted only when Severity_ep_mean, Severity_ep_sd and Sevrity_ep_n were not available.<br>Mean change of Severity from baseline to the endpoint (post-treatment or at its closest time point).                                                                                                     |
| Severity_ch_sd         | Extracted only when Severity_ep_mean, Severity_ep_sd and Sevrity_ep_n were not available.<br>Standard deviation of the above.                                                                                                                                                                         |

| <b>variable</b>    | <b>description</b>                                                                                                                                                                                                               |
|--------------------|----------------------------------------------------------------------------------------------------------------------------------------------------------------------------------------------------------------------------------|
| Severity_ch_n      | Extracted only when Severity_ep_mean, Severity_ep_sd and Severity_ep_n were not available.<br>The number of patients measured their severity change from baseline to the endpoint (post-treatment or at its closest time point). |
| Severity_ep_mean   | Mean severity measured at post-treatment or at its closest time point.                                                                                                                                                           |
| Severity_ep_sd     | Standard deviation of the above.                                                                                                                                                                                                 |
| Severity_ep_n      | The number of patients measured their severity at post-treatment or at its closest time point.                                                                                                                                   |
| Severity_scale     | The scale used for measuring the sleep-related severity. Prioritize; ISI > SCI > FOSQ > ESS > PSQI > AIS > other_self_reported_scales > WASO_SOL > WASO > SOL. We used the definition stated by the author.                      |
| dropout            | The number of patients dropped out from the study for any reason (=the number of patients whose outcome data not available). Those who are lost to follow-up (assessment at post-treatment) were assumed to have dropped off.    |
| SE_mean            | Mean sleep efficiency in %.                                                                                                                                                                                                      |
| SE_sd              | Standard deviation of the above.                                                                                                                                                                                                 |
| SE_n               | The number of patients measured for the numbers above.                                                                                                                                                                           |
| TST_mean           | Mean total sleep time in minutes.                                                                                                                                                                                                |
| TST_sd             | Standard deviation of the above.                                                                                                                                                                                                 |
| TST_n              | The number of patients measured for the numbers above.                                                                                                                                                                           |
| SOL_mean           | Mean sleep onset latency in minutes.                                                                                                                                                                                             |
| SOL_sd             | Standard deviation of the above.                                                                                                                                                                                                 |
| SOL_n              | The number of patients measured for the numbers above.                                                                                                                                                                           |
| WASO_mean          | Mean wake after sleep onset in minutes.                                                                                                                                                                                          |
| WASO_sd            | Standard deviation of the above.                                                                                                                                                                                                 |
| WASO_n             | The number of patients measured for the numbers above.                                                                                                                                                                           |
| Sleep_diary_weeks  | Timepoint when the sleep diary was measured                                                                                                                                                                                      |
| r_long             | The number of patients achieving remission at long-term follow-up (longest follow-up between 3 to 12 months)                                                                                                                     |
| r_long_scale_used  | Scales that were used for counting remission at long-term.                                                                                                                                                                       |
| Severity_mean_long | Mean severity at long-term.                                                                                                                                                                                                      |
| Severity_sd_long   | Standard deviation of the above.                                                                                                                                                                                                 |
| Severity_n_long    | The number of patients measured for the numbers above.                                                                                                                                                                           |

| <b>variable</b>       | <b>description</b>                                                                                     |
|-----------------------|--------------------------------------------------------------------------------------------------------|
| Severity_ch_mean_long | Extracted this only when Severity_mean_long, Severity _ sd_long and Sevrity_n_long were not available. |
| Severity_ch_sd_long   | Extracted this only when Severity_mean_long, Severity _ sd_long and Sevrity_n_long were not available. |
| Severity_ch_n_long    | Extracted this only when Severity_mean_long, Severity _ sd_long and Sevrity_n_long were not available. |
| r_weeks_long          | Timepoint of the measurement of the long-term follow-up in weeks.                                      |

#### 1.4. Additive component network meta-analysis model

Assume that trial  $i$  compares treatment  $X$  (comprising components  $c_1 + c_2$ ) and treatment  $Y$  (comprising component  $c_3 + c_4$ ). Then, this study estimates  $d_1 + d_2 - d_3 - d_4$ , where  $d_c$  shows the benefit (or harm) of adding component  $c$  to the treatment. Likewise, a study that compares  $c_1 + c_2 + c_3$  versus  $c_3$  estimates the combined effect of  $c_1$  and  $c_2$ , i.e.  $d_1 + d_2$ , while the effect of  $c_3$  is inestimable; the effect of  $c_1$  alone and  $c_2$  alone is also not estimable, only their combined effect can be estimated in this study.

In essence, the additive component NMA model assumes that for any given component  $c$ , the relative effects of  $(c + X)$  vs.  $X$  are the same for any combination of components  $X$  (as long as this combination  $X$  does not include  $c$ ). Thus, this model assumes that the following trials are estimating the same relative effects:  $c_1 + c_2$  versus  $c_2$ ;  $c_1 + c_3$  versus  $c_3$ ;  $c_1 + c_2 + c_3$  versus  $c_2 + c_3$ ; etc. According to the additive cNMA model, all these trials are estimating the effect of adding  $c_1$  to a treatment  $X$  not including  $c_1$ .

## eMethods 2. Lists of excluded and included studies

### 2.1. List of the excluded studies with reasons (examples)

We excluded quasi-randomized trials, in which participants were not fully randomized or allocation was clearly not concealed.

- Sidani, S., Epstein, D. R., Fox, M., & Collins, L. Comparing the Effects of Single- and Multiple-Component Therapies for Insomnia on Sleep Outcomes. *Worldviews Evid.-Based Nurs.* 2019;16(3):195–203.
- Morgan, K., Dixon, S., Mathers, N., Thompson, J., & Tomeny, M. Psychological treatment for insomnia in the regulation of long-term hypnotic drug use. *Health technology assessment.* 2004;8(8):iii–68.
- Ellis JG, Cushing T, Germain A. Treating Acute Insomnia: A Randomized Controlled Trial of a "Single-Shot" of Cognitive Behavioral Therapy for Insomnia. *Sleep.* 2015;38(6):971-978.

We excluded trials when 1) the participants were clearly 17 years old or younger, or 2) some of the participants were 18 years old or older but the trial focused on adolescents. We included trials when some of the participants were 17 years old or younger but the majority of participants were 18 years old or older (mean – 2\*SD >18).

- Hiscock H, Sciberras E, Mensah F, et al. Impact of a behavioural sleep intervention on symptoms and sleep in children with attention deficit hyperactivity disorder, and parental mental health: randomised controlled trial. *BMJ.* 2015;350:h68.
- Rogers VE, Zhu S, Ancoli-Israel S, Liu L, Mandrell BN, Hinds PS. A pilot randomized controlled trial to improve sleep and fatigue in children with central nervous system tumors hospitalized for high-dose chemotherapy. *Pediatr Blood Cancer.* 2019;66(8):e27814.

We included trials on patients with chronic insomnia disorder. We excluded trials when the eligibility criteria did not include significant distress or impairment in daytime functioning. (e.g. stating only "sleep problem" or "sleep disturbance", even when they additionally used elevated scores on self-reported scales, or defining insomnia solely on sleep latency or wake time after sleep onset).

- Black, D. S., O'Reilly, G. A., Olmstead, R., Breen, E. C., & Irwin, M. R. Mindfulness meditation and improvement in sleep quality and daytime impairment among older adults with sleep disturbances: a randomized clinical trial. *JAMA internal medicine.* 2015;175(4):494–501.
- Malfliet, A., Bilterys, T., Van Looveren, E., Meeus, M., Danneels, L., Ickmans, K., Cagnie, B., Mairesse, O., Neu, D., Moens, M., Goubert, D., Kamper, S. J., & Nijs, J. The added value of cognitive behavioral therapy for insomnia to current best evidence physical therapy for chronic spinal pain: protocol of a randomized controlled clinical trial. *Brazilian journal of physical therapy.* 2019;23(1):62–70.

We included trials that used elevated scores on ISI for finding probable chronic insomnia disorder.

Consequently, the minimum duration of the symptoms was 2 weeks and trials on patients suffering from sleep problems for less than 2 weeks were excluded.

- Wang LN, Tao H, Zhao Y, Zhou YQ, Jiang XR. Optimal timing for initiation of biofeedback-assisted relaxation training in hospitalized coronary heart disease patients with sleep disturbances. *J Cardiovasc Nurs*. 2014;29(4):367-376.

We were interested in dismantling the effects of each component of CBT-I and therefore excluded trials when they included active components focusing on other symptoms and those components were not equally distributed among arms.

- Thiart H, Lehr D, Ebert DD, Sieland B, Berking M, Riper H. Log in and breathe out: efficacy and cost-effectiveness of an online sleep training for teachers affected by work-related strain--study protocol for a randomized controlled trial. *Trials*. 2013;14:169.

We focused on the effects of CBT-I for improving insomnia symptoms, so we excluded trials that aimed at tapering hypnotics.

- Baillargeon L, Landreville P, Verreault R, Beauchemin JP, Grégoire JP, Morin CM. Discontinuation of benzodiazepines among older insomniac adults treated with cognitive-behavioural therapy combined with gradual tapering: a randomized trial. *CMAJ*. 2003;169(10):1015-1020.

## 2.2. List of the ongoing trials and the terminated/withdrawn trials

### 2.2.1. List of the ongoing trials

#### Ongoing trials

ACTRN1262200067774, ACTRN12622000158763, ACTRN12622000778785, ACTRN12622000940774, ACTRN12622001218785, ACTRN12623000092695, ChiCTR2200055342, IRCT20190304042912N3, ISRCTN10037794, ISRCTN10144646, ISRCTN16185698, ISRCTN91221906, KCT0007290, KCT0007292, NCT02272712, NCT03109210, NCT03208049, NCT03261674, NCT03322774, NCT03327519, NCT03603717, NCT03632889, NCT03727438, NCT03744156, NCT03804788, NCT03954210, NCT04024787, NCT04026048, NCT04100057, NCT04130529, NCT04136054, NCT04144231, NCT04252638, NCT04300218, NCT04308499, NCT04317742, NCT04350333, NCT04377009, NCT04445805, NCT04457674, NCT04463498, NCT04468776, NCT04498754, NCT04581603, NCT04621643, NCT04635085, NCT04646200, NCT04719143, NCT04721067, NCT04751851, NCT04806009, NCT04829539, NCT04831385, NCT04866914, NCT04876001, NCT04885205, NCT04898855, NCT04909229, NCT04949360, NCT04951466, NCT04975776, NCT04986007, NCT05000528, NCT05011929, NCT05015803, NCT05034159, NCT05065242, NCT05067569, NCT05069285, NCT05133908, NCT05136638, NCT05182372, NCT05194930, NCT05226078, NCT05226585, NCT05233800, NCT05244889, NCT05294991, NCT05310136, NCT05353296, NCT05356364, NCT05373537, NCT05387473, NCT05387473, NCT05402761, NCT05406414, NCT05456607, NCT05490550, NCT05516277, NCT05519982, NCT05541055, NCT05548907, NCT05551806, NCT05555108, NCT05558475, NCT05561829, NCT05565833, NCT05568381, NCT05572697, NCT05576090, NCT05582759, NCT05596318, NCT05604820, NCT05663034, NCT05683132, NCT05683145, NCT05710991, NCT05724498, NCT05747963, NCT05759065, NCT05769231, NCT05778812, NCT05780177, RBR-10b889rz

#### Recruitment completed, but results not yet available

ChiCTR2200058023, IRCT20220528055007N1, ISRCTN13837516, ISRCTN27620037, ISRCTN36198096, ISRCTN43900695, ISRCTN58986139, ISRCTN59953554, ISRCTN63989489, ISRCTN70652461, JPRN-UMIN000023999, KCT0007823, NCT00255905, NCT00303342, NCT00321451, NCT00540254, NCT00620789, NCT01019187, NCT01489982, NCT01704352, NCT01764035, NCT01794624, NCT01804907, NCT02092844, NCT02117388, NCT02259101, NCT02299193, NCT02508129, NCT02535923, NCT02658669, NCT02709980, NCT02720458, NCT02741336, NCT02743338, NCT02774642, NCT03041389, NCT03075683, NCT03177967, NCT03213132, NCT03302455, NCT03365024, NCT03366870, NCT03390114, NCT03438331, NCT03493958, NCT03534284, NCT03538574, NCT03826849, NCT04016428, NCT04147052, NCT04345068, NCT04409743, NCT04564807, NCT04566822, NCT05033418, NCT05087121, NCT05115604, NCT05416346, NCT05561790

#### Unknown status

ACTRN12607000143426, ACTRN12618000359235, ACTRN12619001166167, ACTRN12620000394943, ACTRN12620001075976, ACTRN12621001395820, ChiCTR-INR-16008930, ChiCTR-TRC-12002535, ChiCTR1800015570, ChiCTR2000032960, ChiCTR2000036936, CTRI/2021/08/035427, CTRI/2021/09/036922, DRKS00010422, DRKS00021503, DRKS00025713, DRKS00026096, DRKS00026613, DRKS00026770, IRCT201206011483N3, IRCT2015091223955N2, IRCT2017061834608N2, IRCT20180131038582N1, IRCT20190417043300N2, IRCT20210714051894N1, ISRCTN10185189, ISRCTN13596153, ISRCTN17117237, JPRN-UMIN000007626, JPRN-UMIN000013401, JPRN-UMIN000044016, NCT00134108, NCT00170391, NCT00672217, NCT02773693, NCT03267537, NCT03268629, NCT03309527, NCT03461666, NCT03542604, NCT03560843, NCT03918057, NCT04013321, NCT04134949, NCT04242771, NCT04306835, NCT04585282, NCT04653155, NL7943, NTR5142, NTR7419

### 2.2.2. List of the terminated/withdrawn trials

#### **Terminated**

NCT01928173, NCT02102230, NCT02779023, NCT03250468, NCT03337061, NCT04059302, NCT05137457



### 2.3. List of the included trials

#### Abbasi2016

- Abbasi S Ms, Alimohammadi N PhD, Pahlavanzadeh S Ms. Effectiveness of Cognitive Behavioral Therapy on the Quality of Sleep in Women with Multiple Sclerosis: A Randomized Controlled Trial Study. *Int J Community Based Nurs Midwifery*. 2016;4(4):320-328.
- IRCT2015012720833N1

#### Abdelaziz2021

- Abdelaziz EM, Elsharkawy NB, Mohamed SM. Efficacy of Internet-based cognitive behavioral therapy on sleeping difficulties in menopausal women: A randomized controlled trial. *Perspect Psychiatr Care*. 2021;10.1111/ppc.13005.
- NCT04719598

#### Ahorsu2020

- Ahorsu DK, Lin CY, Imani V, et al. Testing an app-based intervention to improve insomnia in patients with epilepsy: A randomized controlled trial. *Epilepsy Behav*. 2020;112:107371.
- NCT03683381

#### Alessi2016

- Alessi C, Martin JL, Fiorentino L, et al. Cognitive Behavioral Therapy for Insomnia in Older Veterans Using Nonclinician Sleep Coaches: Randomized Controlled Trial. *J Am Geriatr Soc*. 2016;64(9):1830-1838.
- Fung CH, Martin JL, Josephson K, et al. Efficacy of Cognitive Behavioral Therapy for Insomnia in Older Adults With Occult Sleep-Disordered Breathing. *Psychosom Med*. 2016;78(5):629-639.
- Yeung T, Martin JL, Fung CH, et al. Sleep Outcomes With Cognitive Behavioral Therapy for Insomnia Are Similar Between Older Adults With Low vs. High Self-Reported Physical Activity. *Front Aging Neurosci*. 2018;10:274.
- Fung CH, Martin JL, Josephson K, et al. Cognitive Expectancies for Hypnotic Use among Older Adult Veterans with Chronic Insomnia. *Clin Gerontol*. 2018;41(2):130-135.
- Dzierzewski JM, Martin JL, Fung CH, et al. CBT for late-life insomnia and the accuracy of sleep and wake perceptions: Results from a randomized-controlled trial. *J Sleep Res*. 2019;28(4):e12809.
- Fung CH, Martin JL, Josephson K, et al. Cognitive Expectancies for Hypnotic Use among Older Adult Veterans with Chronic Insomnia. *Clin Gerontol*. 2018;41(2):130-135.
- NCT00781963

#### Alshehri2020

- Alshehri MM, Alenazi AM, Alothman SA, et al. Using Cognitive Behavioral Therapy for Insomnia in People with Type 2 Diabetes, Pilot RCT Part I: Sleep and Concomitant Symptom. *Behav Sleep Med.* 2021;19(5):652-671.
- Alshehri MM, Alothman SA, Alenazi AM, et al. The effects of cognitive behavioral therapy for insomnia in people with type 2 diabetes mellitus, pilot RCT part II: diabetes health outcomes. *BMC Endocr Disord.* 2020;20(1):136.
- Alshehri MM, Alenazi AM, Hoover JC, et al. Effect of Cognitive Behavioral Therapy for Insomnia on Insomnia Symptoms for Individuals With Type 2 Diabetes: Protocol for a Pilot Randomized Controlled Trial. *JMIR Res Protoc.* 2019;8(12):e14647.
- NCT03713996

#### **Amra2022**

- Amra B, Ghadiry F, Vaezi A, et al. Effect of one-shot cognitive behavioral therapy on insomnia and heart rate variability of health care workers at the time of COVID-19 pandemic: a randomized controlled trial. *Sleep Breath.* 2022;1-8.
- IRCT20171219037964N4

#### **Arnedt2011**

- Arnedt JT, Conroy DA, Armitage R, Brower KJ. Cognitive-behavioral therapy for insomnia in alcohol dependent patients: a randomized controlled pilot trial. *Behav Res Ther.* 2011;49(4):227-233.

#### **Arnedt2021**

- Arnedt JT, Conroy DA, Mooney A, Furgal A, Sen A, Eisenberg D. Telemedicine versus face-to-face delivery of cognitive behavioral therapy for insomnia: a randomized controlled noninferiority trial. *Sleep.* 2021;44(1):zsaa136.
- NCT03293745

#### **Arnedt2023**

- Arnedt JT, Conroy DA, Stewart H, et al. Cognitive behavioral therapy for insomnia to reduce cannabis use: Results from a pilot randomized controlled trial. *Drug Alcohol Depend.* 2023;246:109835. doi:10.1016/j.drugalcdep.2023.109835

#### **Ashworth2015**

- Ashworth DK, Sletten TL, Junge M, et al. A randomized controlled trial of cognitive behavioral therapy for insomnia: an effective treatment for comorbid insomnia and depression. *J Couns Psychol.* 2015;62(2):115-123.

#### **Ayabe2018**

- Ayabe N, Okajima I, Nakajima S, et al. Effectiveness of cognitive behavioral therapy for pharmacotherapy-resistant chronic insomnia: a multi-center randomized controlled trial in Japan. *Sleep Med.* 2018;50:105-112.
- JPRN-UMIN000014297
- One of the co-authors confirmed that waiting-list component was present in the control group.

#### **Ballou2020**

- Ballou S, Katon J, Rangan V, et al. Brief Behavioral Therapy for Insomnia in Patients with Irritable Bowel Syndrome: A Pilot Study. *Dig Dis Sci.* 2020;65(11):3260-3270.

#### **Bastein2004**

- Bastien CH, Morin CM, Ouellet MC, Blais FC, Bouchard S. Cognitive-behavioral therapy for insomnia: comparison of individual therapy, group therapy, and telephone consultations. *J Consult Clin Psychol.* 2004;72(4):653-659.

#### **Behera2023**

- Behera CK, Reddy TK, Behera L, Birbaumer N, Ika K. A Meditation Based Cognitive Therapy (HMBCT) for Primary Insomnia: A Treatment Feasibility Pilot Study [published online ahead of print, 2023 Apr 27]. *Appl Psychophysiol Biofeedback.* 2023;10.1007/s10484-023-09586-2. doi:10.1007/s10484-023-09586-2

#### **Bernstein2017**

- Bernstein AM, Allexandre D, Bena J, et al. "Go! to Sleep": A Web-Based Therapy for Insomnia. *Telemed J E Health.* 2017;23(7):590-599.
- NCT01440777

#### **Bothelius2013**

- Bothelius K, Kyhle K, Espie CA, Broman JE. Manual-guided cognitive-behavioural therapy for insomnia delivered by ordinary primary care personnel in general medical practice: a randomized controlled effectiveness trial. *J Sleep Res.* 2013;22(6):688-696.
- NCT01655797

#### **Bramoweth2020**

- Bramoweth AD, Lederer LG, Youk AO, Germain A, Chinman MJ. Brief Behavioral Treatment for Insomnia vs. Cognitive Behavioral Therapy for Insomnia: Results of a Randomized Noninferiority Clinical Trial Among Veterans. *Behav Ther.* 2020;51(4):535-547.
- Bramoweth AD, Germain A, Youk AO, Rodriguez KL, Chinman MJ. A hybrid type I trial to increase Veterans' access to insomnia care: study protocol for a randomized controlled trial. *Trials.* 2018;19(1):73.
- NCT02724800

### **Broomfield2003**

- Broomfield NM, Espie CA. Initial Insomnia And Paradoxical Intention: An Experimental Investigation Of Putative Mechanisms Using Subjective And Actigraphic Measurement Of Sleep. *Behavioural and Cognitive Psychotherapy*. 2003;31(3):313-324.

### **Buysse2011**

- Buysse DJ, Germain A, Moul DE, et al. Efficacy of brief behavioral treatment for chronic insomnia in older adults [published correction appears in *JAMA Intern Med*. 2019 Aug 1;179(8):1152]. *Arch Intern Med*. 2011;171(10):887-895.
- Errors in Table Headings. *JAMA Intern Med*. 2019;179(8):1152. doi:10.1001/jamainternmed.2019.1927
- Germain A, Moul DE, Franzen PL, et al. Effects of a brief behavioral treatment for late-life insomnia: preliminary findings. *J Clin Sleep Med*. 2006;2(4):403-406.
- Troxel WM, Conrad TS, Germain A, Buysse DJ. Predictors of treatment response to brief behavioral treatment of insomnia (BBTI) in older adults. *J Clin Sleep Med*. 2013;9(12):1281-1289.
- Tyagi S, Resnick NM, Perera S, Monk TH, Hall MH, Buysse DJ. Behavioral treatment of insomnia: also effective for nocturia. *J Am Geriatr Soc*. 2014;62(1):54-60.
- Tyagi S, Resnick NM, Perera S, Monk TH, Hall MH, Buysse DJ. Behavioral treatment of chronic insomnia in older adults: does nocturia matter?. *Sleep*. 2014;37(4):681-687.
- Wilckens KA, Hall MH, Nebes RD, Monk TH, Buysse DJ. Changes in Cognitive Performance Are Associated with Changes in Sleep in Older Adults With Insomnia. *Behav Sleep Med*. 2016;14(3):295-310.
- NCT00177203

### **Cai2023**

- Cai ZZ, Lin R, Wang XX, Yan YJ, Li H. Effects of mindfulness in patients with mild cognitive impairment with insomnia: A double-blind randomized controlled trial. *Geriatr Nurs*. 2022;47:239-246. doi:10.1016/j.gerinurse.2022.08.001

### **Cape2016**

- Cape J, Leibowitz J, Whittington C, Espie CA, Pilling S. Group cognitive behavioural treatment for insomnia in primary care: a randomized controlled trial. *Psychol Med*. 2016;46(5):1015-1025.
- ISRCTN17064995

### **Carney2017**

- Carney CE, Edinger JD, Kuchibhatla M, et al. Cognitive Behavioral Insomnia Therapy for Those With Insomnia and Depression: A Randomized Controlled Clinical Trial. *Sleep*. 2017;40(4):zsx019.
- NCT0062079

**Carrera1980**

- Carrera RN, Elenewski JJ. Implosive therapy as a treatment for insomnia. *J Clin Psychol.* 1980;36(3):729-734.

**Casault2015**

- Casault L, Savard J, Ivers H, Savard MH. A randomized-controlled trial of an early minimal cognitive-behavioural therapy for insomnia comorbid with cancer. *Behav Res Ther.* 2015;67:45-54.

**Chakravorty2019**

- Chakravorty S, Morales KH, Arnedt JT, et al. Cognitive Behavioral Therapy for Insomnia in Alcohol-Dependent Veterans: A Randomized, Controlled Pilot Study. *Alcohol Clin Exp Res.* 2019;43(6):1244-1253.
- NCT01603381

**Chan2021**

- Chan CS, Wong CYF, Yu BYM, Hui VKY, Ho FYY, Cuijpers P. Treating depression with a smartphone-delivered self-help cognitive behavioral therapy for insomnia: a parallel-group randomized controlled trial. *Psychological Medicine.* 2021:1-15.
- Hui VK, Wong CY, Ma EK, Ho FY, Chan CS. Treating depression with a smartphone-delivered self-help cognitive behavioral therapy for insomnia: study protocol for a parallel group randomized controlled trial. *Trials.* 2020;21(1):843.
- NCT04228146

**Chao2021**

- Chao LL, Kanady JC, Crocker N, et al. Cognitive behavioral therapy for insomnia in veterans with gulf war illness: Results from a randomized controlled trial. *Life Sci.* 2021;279:119147.
- NCT02782780

**Chapoutot2020**

- Chapoutot M, Peter-Derex L, Schoendorff B, Faivre T, Bastuji H, Putois B. Telehealth-delivered CBT-I programme enhanced by acceptance and commitment therapy for insomnia and hypnotic dependence: A pilot randomized controlled trial. *J Sleep Res.* 2021;30(1):e13199.

**Cheng2019**

- Cheng P, Kalmbach DA, Tallent G, Joseph CL, Espie CA, Drake CL. Depression prevention via digital cognitive behavioral therapy for insomnia: a randomized controlled trial. *Sleep.* 2019;42(10):zsz150.
- Cheng P, Luik AI, Fellman-Couture C, et al. Efficacy of digital CBT for insomnia to reduce depression across demographic groups: a randomized trial. *Psychol Med.* 2019;49(3):491-500.

- Cheng P, Kalmbach DA, Castelan AC, Murugan N, Drake CL. Depression prevention in digital cognitive behavioral therapy for insomnia: Is rumination a mediator?. *J Affect Disord.* 2020;273:434-441.
- Cheng P, Casement MD, Kalmbach DA, Castelan AC, Drake CL. Digital cognitive behavioral therapy for insomnia promotes later health resilience during the coronavirus disease 19 (COVID-19) pandemic. *Sleep.* 2021;44(4):zsaa258.
- Cheng P, Casement MD, Kalmbach DA, Cuamatzi Castelan A, Drake CL. Self-efficacy in Insomnia Symptom Management after Digital CBT-I Mediates Insomnia Severity during the COVID-19 Pandemic. *Behav Sleep Med.* 2022;20(5):638-648.
- Cheng P, Kalmbach DA, Hsieh HF, Castelan AC, Sagong C, Drake CL. Improved resilience following digital cognitive behavioral therapy for insomnia protects against insomnia and depression one year later [published online ahead of print, 2022 Mar 8]. *Psychol Med.* 2022;1-11.
- NCT02988375

### **Christensen2016**

- Christensen H, Batterham PJ, Gosling JA, et al. Effectiveness of an online insomnia program (SHUTi) for prevention of depressive episodes (the GoodNight Study): a randomised controlled trial. *Lancet Psychiatry.* 2016;3(4):333-341.
- Gosling JA, Glozier N, Griffiths K, et al. The GoodNight study--online CBT for insomnia for the indicated prevention of depression: study protocol for a randomised controlled trial. *Trials.* 2014;15:56.
- Batterham PJ, Christensen H, Mackinnon AJ, et al. Trajectories of change and long-term outcomes in a randomised controlled trial of internet-based insomnia treatment to prevent depression. *BJPsych Open.* 2017;3(5):228-235.
- Gosling JA, Batterham P, Ritterband L, et al. Online insomnia treatment and the reduction of anxiety symptoms as a secondary outcome in a randomised controlled trial: The role of cognitive-behavioural factors. *Aust N Z J Psychiatry.* 2018;52(12):1183-1193.
- ACTRN12611000121965

### **Chun2023**

- Chung KF, Lee CT, Au CH, et al. Cognitive behavioural therapy for insomnia as an early intervention of mood disorders with comorbid insomnia: A randomized controlled trial [published online ahead of print, 2023 May 16]. *Early Interv Psychiatry.* 2023;10.1111/eip.13435. doi:10.1111/eip.13435
- NCT03000894

### **Craner2022**

- Craner JR, Flegge LG, Gabelman RB. Treatment of Insomnia within an Interdisciplinary Pain Rehabilitation Program: A Randomized Trial. *Int J Clin Health Psychol.* 2022;22(2):100295.

### **Currie2000**

- Currie SR, Wilson KG, Pontefract AJ, deLaplante L. Cognitive-behavioral treatment of insomnia secondary to chronic pain. *J Consult Clin Psychol*. 2000;68(3):407-416.
- Currie, SR. Cognitive-behavioural treatment of insomnia secondary to chronic pain. 2000. Dissertation

#### **Currie2004**

- Currie SR, Clark S, Hodgins DC, El-Guebaly N. Randomized controlled trial of brief cognitive-behavioural interventions for insomnia in recovering alcoholics. *Addiction*. 2004;99(9):1121-1132.

#### **Daren2012**

- Daren, Andrew Michael. Brief behavioral treatment of insomnia in patients with orofacial pain. 2012. Dissertation

#### **Dean2019**

- Dean GE, Weiss C, Jungquist CR, et al. Nurse-Delivered Brief Behavioral Treatment for Insomnia in Lung Cancer Survivors: A Pilot RCT. *Behav Sleep Med*. 2020;18(6):774-786.

#### **Dekker2020**

- Dekker K, Benjamins JS, Maksimovic T, et al. Combined Internet-Based Cognitive-Behavioral and Chronobiological Intervention for Insomnia: A Randomized Controlled Trial. *Psychother Psychosom*. 2020;89(2):117-118.
- Dekker K, Benjamins JS, Van Straten A, Hofman WF, Van Someren EJ. Effectiveness of internet-supported cognitive behavioral and chronobiological interventions and effect moderation by insomnia subtype: study protocol of a randomized controlled trial. *Trials*. 2015;16:292.
- NTR4010

#### **Dirksen2008**

- Dirksen SR, Epstein DR. Efficacy of an insomnia intervention on fatigue, mood and quality of life in breast cancer survivors. *J Adv Nurs*. 2008;61(6):664-675.

#### **Drake2019**

- Drake CL, Kalmbach DA, Arnedt JT, et al. Treating chronic insomnia in postmenopausal women: a randomized clinical trial comparing cognitive-behavioral therapy for insomnia, sleep restriction therapy, and sleep hygiene education. *Sleep*. 2019;42(2):zsy217.
- Kalmbach DA, Cheng P, Arnedt JT, et al. Treating insomnia improves depression, maladaptive thinking, and hyperarousal in postmenopausal women: comparing cognitive-behavioral therapy for insomnia (CBTI), sleep restriction therapy, and sleep hygiene education. *Sleep Med*. 2019;55:124-134.

- Kalmbach DA, Cheng P, Arnedt JT, et al. Improving Daytime Functioning, Work Performance, and Quality of Life in Postmenopausal Women With Insomnia: Comparing Cognitive Behavioral Therapy for Insomnia, Sleep Restriction Therapy, and Sleep Hygiene Education. *J Clin Sleep Med*. 2019;15(7):999-1010.
- Kalmbach DA, Cheng P, Roth T, Sagong C, Drake CL. Objective sleep disturbance is associated with poor response to cognitive and behavioral treatments for insomnia in postmenopausal women. *Sleep Med*. 2020;73:82-92.
- Cheng P, Kalmbach D, Fellman-Couture C, Arnedt JT, Cuamatzi-Castelan A, Drake CL. Risk of excessive sleepiness in sleep restriction therapy and cognitive behavioral therapy for insomnia: a randomized controlled trial. *J Clin Sleep Med*. 2020;16(2):193-198.
- NCT01933295

#### **Dyrberg2022**

- Dyrberg H, Bjarvatn B, Larsen ER. Cognitive Behavioral Therapy for Chronic Insomnia in Outpatients with Major Depression-A Randomised Controlled Trial. *J Clin Med*. 2022;11(19):5845.
- NCT02678702

#### **Edinger2001**

- Edinger JD, Wohlgemuth WK, Radtke RA, Marsh GR, Quillian RE. Cognitive behavioral therapy for treatment of chronic primary insomnia: a randomized controlled trial. *JAMA*. 2001;285(14):1856-1864.
- Edinger JD, Wohlgemuth WK, Radtke RA, Marsh GR, Quillian RE. Does cognitive-behavioral insomnia therapy alter dysfunctional beliefs about sleep? *Sleep*. 2001;24(5):591-599.
- Krystal AD, Edinger JD. Sleep EEG predictors and correlates of the response to cognitive behavioral therapy for insomnia. *Sleep*. 2010;33(5):669-677.
- Edinger JD, Carney CE, Wohlgemuth WK. Pretherapy cognitive dispositions and treatment outcome in cognitive behavior therapy for insomnia. *Behav Ther*. 2008;39(4):406-416.

#### **Edinger2003**

- Edinger JD, Sampson WS. A primary care "friendly" cognitive behavioral insomnia therapy. *Sleep*. 2003;26(2):177-182.

#### **Edinger2005**

- Edinger JD, Wohlgemuth WK, Krystal AD, Rice JR. Behavioral insomnia therapy for fibromyalgia patients: a randomized clinical trial. *Arch Intern Med*. 2005;165(21):2527-2535.
- NCT00000397

#### **Edinger2007**

- Edinger JD, Wohlgemuth WK, Radtke RA, Coffman CJ, Carney CE. Dose-response effects of cognitive-behavioral insomnia therapy: a randomized clinical trial. *Sleep*. 2007;30(2):203-212.



- Edinger JD, Carney CE, Wohlgenuth WK. Pretherapy cognitive dispositions and treatment outcome in cognitive behavior therapy for insomnia. *Behav Ther.* 2008;39(4):406-416.
- Bathgate CJ, Edinger JD, Krystal AD. Insomnia Patients With Objective Short Sleep Duration Have a Blunted Response to Cognitive Behavioral Therapy for Insomnia. *Sleep.* 2017;40(1):zsw012.

#### **Edinger2009**

- Edinger JD, Olsen MK, Stechuchak KM, et al. Cognitive behavioral therapy for patients with primary insomnia or insomnia associated predominantly with mixed psychiatric disorders: a randomized clinical trial. *Sleep.* 2009;32(4):499-510.
- NCT00105872

#### **EIRafihiferreira2021**

- El Rafihi-Ferreira R, Morin CM, Toscanini AC, et al. Acceptance and commitment therapy-based behavioral intervention for insomnia: a pilot randomized controlled trial. *Braz J Psychiatry.* 2021;43(5):504-509.
- RBR-7nc5wq

#### **EIRafihiferreira2022**

- El Rafihi-Ferreira R, Morin CM, Hasan R, Brasil IS, Zago Ribeiro JH Júnior, Cecília Toscanini A. A Pilot Randomized Controlled Trial (RCT) of Acceptance and Commitment Therapy Versus Cognitive Behavioral Therapy for Chronic Insomnia [published online ahead of print, 2022 May 10]. *Behav Sleep Med.* 2022;1-15.
- RBR-7nc5wq

#### **Epstein2007**

- Epstein DR, Dirksen SR. Randomized trial of a cognitive-behavioral intervention for insomnia in breast cancer survivors. *Oncol Nurs Forum.* 2007;34(5):E51-E59.

#### **Epstein2012**

- Epstein DR, Sidani S, Bootzin RR, Belyea MJ. Dismantling multicomponent behavioral treatment for insomnia in older adults: a randomized controlled trial. *Sleep.* 2012;35(6):797-805.
- NCT01154023

#### **Espie1989**

- Espie CA, Brooks DN, Lindsay WR. An evaluation of tailored psychological treatment of insomnia. *J Behav Ther Exp Psychiatry.* 1989;20(2):143-153.
- Espie, CA. A controlled comparative investigation of psychological treatments for chronic sleep-onset insomnia. 1987. Dissertation

### **Espie2001**

- Espie CA, Inglis SJ, Tessier S, Harvey L. The clinical effectiveness of cognitive behaviour therapy for chronic insomnia: implementation and evaluation of a sleep clinic in general medical practice. *Behav Res Ther.* 2001;39(1):45-60.

### **Espie2007**

- Espie CA, MacMahon KM, Kelly HL, et al. Randomized clinical effectiveness trial of nurse-administered small-group cognitive behavior therapy for persistent insomnia in general practice. *Sleep.* 2007;30(5):574-584.
- NCT00170417

### **Espie2008**

- Espie CA, Fleming L, Cassidy J, et al. Randomized controlled clinical effectiveness trial of cognitive behavior therapy compared with treatment as usual for persistent insomnia in patients with cancer. *J Clin Oncol.* 2008;26(28):4651-4658.
- Fleming L, Randell K, Harvey CJ, Espie CA. Does cognitive behaviour therapy for insomnia reduce clinical levels of fatigue, anxiety and depression in cancer patients? *Psychooncology.* 2014;23(6):679-684.

### **Espie2012**

- Espie CA, Kyle SD, Williams C, et al. A randomized, placebo-controlled trial of online cognitive behavioral therapy for chronic insomnia disorder delivered via an automated media-rich web application. *Sleep.* 2012;35(6):769-781.
- Espie CA, Kyle SD, Miller CB, Ong J, Hames P, Fleming L. Attribution, cognition and psychopathology in persistent insomnia disorder: outcome and mediation analysis from a randomized placebo-controlled trial of online cognitive behavioural therapy. *Sleep Med.* 2014;15(8):913-917.
- Henry AL, Miller CB, Emsley R, et al. Insomnia as a mediating therapeutic target for depressive symptoms: A sub-analysis of participant data from two large randomized controlled trials of a digital sleep intervention. *J Sleep Res.* 2021;30(1):e13140.
- ISRCTN44615689

### **Espie2019**

- Espie CA, Emsley R, Kyle SD, et al. Effect of Digital Cognitive Behavioral Therapy for Insomnia on Health, Psychological Well-being, and Sleep-Related Quality of Life: A Randomized Clinical Trial. *JAMA Psychiatry.* 2019;76(1):21-30.
- Luik AI, Marsden A, Emsley R, et al. Long-term benefits of digital cognitive behavioural therapy for insomnia: Follow-up report from a randomized clinical trial. *J Sleep Res.* 2020;29(4):e13018.

- Song Y, Kelly MR, Fung CH, et al. Change in Dysfunctional Sleep-Related Beliefs is Associated with Changes in Sleep and Other Health Outcomes Among Older Veterans With Insomnia: Findings From a Randomized Controlled Trial. *Ann Behav Med.* 2022;56(1):35-49.
- ISRCTN60530898

#### **Falloon2015**

- Falloon K, Elley CR, Fernando A 3rd, Lee AC, Arroll B. Simplified sleep restriction for insomnia in general practice: a randomised controlled trial. *Br J Gen Pract.* 2015;65(637):e508-e515.
- ACTRN12609000127202

#### **Farsani2021**

- Moradi Farsani H, Afshari P, Sadeghniaat Haghighi K, Gholamzadeh Jefreh M, Abedi P, Haghhighizadeh MH. The effect of group cognitive behavioural therapy for insomnia in postmenopausal women. *J Sleep Res.* 2021;30(5):e13345.
- IRCT20180918041065N1

#### **Felder2020**

- Felder JN, Epel ES, Neuhaus J, Krystal AD, Prather AA. Efficacy of Digital Cognitive Behavioral Therapy for the Treatment of Insomnia Symptoms Among Pregnant Women: A Randomized Clinical Trial [published correction appears in *JAMA Psychiatry.* 2020 Jul 1;77(7):768]. *JAMA Psychiatry.* 2020;77(5):484-492.
- Errors in Conflict of Interest Disclosures. *JAMA Psychiatry.* 2020;77(7):768.
- Felder JN, Epel ES, Neuhaus J, Krystal AD, Prather AA. Randomized controlled trial of digital cognitive behavior therapy for prenatal insomnia symptoms: effects on postpartum insomnia and mental health. *Sleep.* 2022;45(2):zsab280.
- NCT02805998

#### **Fernando2013**

- Fernando A 3rd, Arroll B, Falloon K. A double-blind randomised controlled study of a brief intervention of bedtime restriction for adult patients with primary insomnia. *J Prim Health Care.* 2013;5(1):5-10.

#### **Feuerstein2017**

- Feuerstein S, Hodges SE, Keenaghan B, Bessette A, Forselius E, Morgan PT. Computerized Cognitive Behavioral Therapy for Insomnia in a Community Health Setting. *J Clin Sleep Med.* 2017;13(2):267-274.

#### **Ford2022**

- Ford ME, Geurtsen GJ, Groet E, Rambaran Mishre RD, Van Bennekom CAM, Van Someren EJW. A blended eHealth intervention for insomnia following acquired brain injury: a randomised controlled trial. *J Sleep Res.* 2022;e13629.
- Ford ME, Geurtsen GJ, Groet E, Van Bennekom CAM, Van Someren EJW. A blended eHealth intervention for insomnia following acquired brain injury: study protocol for a randomized controlled trial. *Trials.* 2020;21(1):861.
- NL6895; NTR7082

#### **Fowler2009**

- Fowler, Margaret S. Treatment of late-life insomnia in female participants living in a rural community using a multi-component self-help intervention. 2009. *Dissertation.*

#### **Freeman2015**

- Freeman D, Waite F, Startup H, et al. Efficacy of cognitive behavioural therapy for sleep improvement in patients with persistent delusions and hallucinations (BEST): a prospective, assessor-blind, randomised controlled pilot trial. *Lancet Psychiatry.* 2015;2(11):975-983.
- Freeman D, Startup H, Myers E, et al. The effects of using cognitive behavioural therapy to improve sleep for patients with delusions and hallucinations (the BEST study): study protocol for a randomized controlled trial. *Trials.* 2013;14:214.
- Tsiachristas A, Waite F, Freeman D, Luengo-Fernandez R. Cost-effectiveness of cognitive-behavioural therapy for sleep disorder added to usual care in patients with schizophrenia: the BEST study. *BJPsych Open.* 2018;4(3):126-135.
- ISRCTN 33695128

#### **Freeman2017**

- Freeman D, Sheaves B, Goodwin GM, et al. The effects of improving sleep on mental health (OASIS): a randomised controlled trial with mediation analysis. *Lancet Psychiatry.* 2017;4(10):749-758.
- Freeman D, Sheaves B, Goodwin GM, et al. Effects of cognitive behavioural therapy for insomnia on the mental health of university students: study protocol for a randomized controlled trial. *Trials.* 2015;16:236.
- Henry AL, Miller CB, Emsley R, et al. Insomnia as a mediating therapeutic target for depressive symptoms: A sub-analysis of participant data from two large randomized controlled trials of a digital sleep intervention. *J Sleep Res.* 2021;30(1):e13140.
- Henry AL, Miller CB, Emsley R, et al. Insomnia as a mediating therapeutic target for depressive symptoms: A sub-analysis of participant data from two large randomized controlled trials of a digital sleep intervention. *J Sleep Res.* 2021;30(1):e13140.
- ISRCTN61272551

#### **Fucito2014**

- Fucito LM, Redeker NS, Ball SA, Toll BA, Ikomi JT, Carroll KM. Integrating a Behavioural Sleep Intervention into Smoking Cessation Treatment for Smokers with Insomnia: A Randomised Pilot Study. *J Smok Cessat.* 2014;9(1):31-38.

#### **Garcia2018**

- Garcia MC, Kozasa EH, Tufik S, Mello LEAM, Hachul H. The effects of mindfulness and relaxation training for insomnia (MRTI) on postmenopausal women: a pilot study. *Menopause.* 2018;25(9):992-1003.
- NCT01593436

#### **Garland2014**

- Garland SN, Carlson LE, Stephens AJ, Antle MC, Samuels C, Campbell TS. Mindfulness-based stress reduction compared with cognitive behavioral therapy for the treatment of insomnia comorbid with cancer: a randomized, partially blinded, noninferiority trial. *J Clin Oncol.* 2014;32(5):449-457.
- Garland SN, Rouleau CR, Campbell T, Samuels C, Carlson LE. The Comparative Impact of Mindfulness-Based Cancer Recovery (MBCR) and Cognitive Behavior Therapy for Insomnia (CBT-I) on Sleep and Mindfulness in Cancer Patients. *Explore (NY).* 2015;11(6):445-454.
- NCT01335776

#### **Gebara2019**

- Gebara MA, DiNapoli EA, Lederer LG, et al. Brief behavioral treatment for insomnia in older adults with late-life treatment-resistant depression and insomnia: a pilot study. *Sleep Biol Rhythms.* 2019;17(3):287-295.

#### **Gehrman2020**

- Gehrman P, Barilla H, Medvedeva E, et al. Randomized trial of telehealth delivery of cognitive-behavioral treatment for insomnia vs. in-person treatment in veterans with PTSD. *J Affect Disord.* 2020;1:100018.
- NCT01686438

#### **Gehrman2021**

- Gehrman P, Gunter P, Findley J, et al. Randomized Noninferiority Trial of Telehealth Delivery of Cognitive Behavioral Treatment of Insomnia Compared to In-Person Care. *J Clin Psychiatry.* 2021;82(5):20m13723.
- NCT03328585

#### **Germain2014**

- Germain A, Richardson R, Stocker R, et al. Treatment for insomnia in combat-exposed OEF/OIF/OND military veterans: preliminary randomized controlled trial. *Behav Res Ther.* 2014;61:78-88.
- NCT00840255

### **Glieselmann2019**

- Gieselmann A, Pietrowsky R. The effects of brief chat-based and face-to-face psychotherapy for insomnia: a randomized waiting list controlled trial. *Sleep Med.* 2019;61:63-72.
- DRKS00010522

### **Glozier2019**

- Cockayne NL, Christensen HM, Griffiths KM, et al. The Sleep Or Mood Novel Adjunctive therapy (SOMNA) trial: a study protocol for a randomised controlled trial evaluating an internet-delivered cognitive behavioural therapy program for insomnia on outcomes of standard treatment for depression in men. *BMC Psychiatry.* 2015;15:16.
- Glozier N, Christensen H, Griffiths KM, et al. Adjunctive Internet-delivered cognitive behavioural therapy for insomnia in men with depression: A randomised controlled trial. *Aust N Z J Psychiatry.* 2019;53(4):350-360.
- ACTRN12612000985886

### **Greeff1998**

- Greeff AP, Conradie WS. Use of progressive relaxation training for chronic alcoholics with insomnia. *Psychol Rep.* 1998;82(2):407-412.

### **Guarnaccia2023**

- Guarnaccia JB, Njike VY, Dutton A, et al. A pilot, randomized, placebo-controlled study of mindfulness meditation in treating insomnia in multiple sclerosis. *BMC Neurol.* 2023;23(1):263. Published 2023 Jul 11. doi:10.1186/s12883-023-03309-0
- NCT03949296

### **Hagatun2019**

- Hagatun S, Vedaa Ø, Nordgreen T, et al. The Short-Term Efficacy of an Unguided Internet-Based Cognitive-Behavioral Therapy for Insomnia: A Randomized Controlled Trial With a Six-Month Nonrandomized Follow-Up. *Behav Sleep Med.* 2019;17(2):137-155.
- Hagatun S, Vedaa Ø, Harvey AG, et al. Internet-delivered cognitive-behavioral therapy for insomnia and comorbid symptoms. *Internet Interv.* 2018;12:11-15.
- Lien M, Bredeli E, Sivertsen B, et al. Short and long-term effects of unguided internet-based cognitive behavioral therapy for chronic insomnia in morning and evening persons: a post-hoc analysis. *Chronobiol Int.* 2019;36(10):1384-1398.
- Vedaa Ø, Hagatun S, Kallestad H, et al. Long-Term Effects of an Unguided Online Cognitive Behavioral Therapy for Chronic Insomnia. *J Clin Sleep Med.* 2019;15(1):101-110.
- NCT02261272

### **Hall2022**

- Hall DL, Arditte Hall KA, Gorman MJ, et al. The Survivorship Sleep Program (SSP): A synchronous, virtual cognitive behavioral therapy for insomnia pilot program among cancer survivors. *Cancer*. 2022;128(7):1532-1544.
- NCT04566068

### **Ham2020**

- Ham OK, Lee BG, Choi E, Choi SJ. Efficacy of Cognitive Behavioral Treatment for Insomnia: A Randomized Controlled Trial. *West J Nurs Res*. 2020;42(12):1104-1112.

### **Harris2012**

- Harris J, Lack L, Kemp K, Wright H, Bootzin R. A randomized controlled trial of intensive sleep retraining (ISR): a brief conditioning treatment for chronic insomnia. *Sleep*. 2012;35(1):49-60.

### **Harris2019**

- Harris KM, Schiele SE, Emery CF. Pilot randomized trial of brief behavioral treatment for insomnia in patients with heart failure. *Heart Lung*. 2019;48(5):373-380.
- Harris, KM. Insomnia, cognitive impairment, and decision-making among patients with heart failure: A randomized study of brief behavioral treatment for insomnia. Doctoral dissertation, Ohio State University, 2018.
- NCT03636880

### **Harvey2014**

- Harvey AG, Bélanger L, Talbot L, et al. Comparative efficacy of behavior therapy, cognitive therapy, and cognitive behavior therapy for chronic insomnia: a randomized controlled trial. *J Consult Clin Psychol*. 2014;82(4):670-683.
- Eidelman P, Talbot L, Ivers H, Bélanger L, Morin CM, Harvey AG. Change in Dysfunctional Beliefs About Sleep in Behavior Therapy, Cognitive Therapy, and Cognitive-Behavioral Therapy for Insomnia. *Behav Ther*. 2016;47(1):102-115.
- Bélanger L, Harvey AG, Fortier-Brochu É, et al. Impact of comorbid anxiety and depressive disorders on treatment response to cognitive behavior therapy for insomnia. *J Consult Clin Psychol*. 2016;84(8):659-667.
- Harvey AG, Dong L, Bélanger L, Morin CM. Mediators and treatment matching in behavior therapy, cognitive therapy and cognitive behavior therapy for chronic insomnia. *J Consult Clin Psychol*. 2017;85(10):975-987.
- Dong L, Soehner AM, Bélanger L, Morin CM, Harvey AG. Treatment agreement, adherence, and outcome in cognitive behavioral treatments for insomnia. *J Consult Clin Psychol*. 2018;86(3):294-299.

- Lancee J, Harvey AG, Morin CM, Ivers H, van der Zweerde T, Blanken TF. Network Intervention Analyses of cognitive therapy and behavior therapy for insomnia: Symptom specific effects and process measures. *Behav Res Ther.* 2022;153:104100.
- NCT00869934

#### **Harvey2015**

- Harvey AG, Soehner AM, Kaplan KA, et al. Treating insomnia improves mood state, sleep, and functioning in bipolar disorder: a pilot randomized controlled trial. *J Consult Clin Psychol.* 2015;83(3):564-577.
- Lee JY, Harvey AG. Memory for therapy in bipolar disorder and comorbid insomnia. *J Consult Clin Psychol.* 2015;83(1):92-102.

#### **Ho2014**

- Ho FY, Chung KF, Yeung WF, Ng TH, Cheng SK. Weekly brief phone support in self-help cognitive behavioral therapy for insomnia disorder: Relevance to adherence and efficacy. *Behav Res Ther.* 2014;63:147-156.
- Yeung WF, Chung KF, Ho FY, Ho LM. Predictors of dropout from internet-based self-help cognitive behavioral therapy for insomnia. *Behav Res Ther.* 2015;73:19-24.
- Chung KF, Ho FY, Yeung WF. Psychometric Comparison of the Full and Abbreviated Versions of the Dysfunctional Beliefs and Attitudes about Sleep Scale. *J Clin Sleep Med.* 2016;12(6):821-828.
- NCT01719120

#### **Ho2021**

- Ho FY, Choi WT, Yeung WF, Lam HK, Lau WY, Chung KF. The efficacy of integrated cognitive behavioral therapy (CBT) and acupressure versus CBT for insomnia: a three-arm pilot randomized controlled trial. *Sleep Med.* 2021;87:158-167.
- NCT03291301

#### **Holmqvist2014**

- Holmqvist M, Vincent N, Walsh K. Web- vs. telehealth-based delivery of cognitive behavioral therapy for insomnia: a randomized controlled trial. *Sleep Med.* 2014;15(2):187-195.
- NCT01162655

#### **Horsch2017**

- Horsch CH, Lancee J, Griffioen-Both F, et al. Mobile Phone-Delivered Cognitive Behavioral Therapy for Insomnia: A Randomized Waitlist Controlled Trial. *J Med Internet Res.* 2017;19(4):e70.
- NTR5560



#### **Hou2014**

- Hou Y, Hu P, Liang Y, Mo Z. Effects of cognitive behavioral therapy on insomnia of maintenance hemodialysis patients. *Cell Biochem Biophys*. 2014;69(3):531-537.

#### **Jacob1993**

- Jacobs GD, Rosenberg PA, Friedman R, et al. Multifactor behavioral treatment of chronic sleep-onset insomnia using stimulus control and the relaxation response. A preliminary study. *Behav Modif*. 1993;17(4):498-509.

#### **Jacobs2004**

- Jacobs GD, Pace-Schott EF, Stickgold R, Otto MW. Cognitive behavior therapy and pharmacotherapy for insomnia: a randomized controlled trial and direct comparison. *Arch Intern Med*. 2004;164(17):1888-1896.
- NCT00005753

#### **JanssonFrojmark2012a**

- Jansson-Fröjmark M, Lind M, Sunnhed R. Don't worry, be constructive: a randomized controlled feasibility study comparing behaviour therapy singly and combined with constructive worry for insomnia. *Br J Clin Psychol*. 2012;51(2):142-157.

#### **JanssonFrojmark2012b**

- Jansson-Fröjmark M, Linton SJ, Flink IK, Granberg S, Danermark B, Norell-Clarke A. Cognitive-behavioral therapy for insomnia co-morbid with hearing impairment: a randomized controlled trial. *J Clin Psychol Med Settings*. 2012;19(2):224-234.

#### **Jarnefelt2020**

- Järnefelt H, Härmä M, Sallinen M, et al. Cognitive behavioural therapy interventions for insomnia among shift workers: RCT in an occupational health setting. *Int Arch Occup Environ Health*. 2020;93(5):535-550.
- NCT02523079

#### **Javaheri2020**

- Javaheri S, Reid M, Drerup M, Mehra R, Redline S. Reducing Coronary Heart Disease Risk Through Treatment of Insomnia Using Web-Based Cognitive Behavioral Therapy for Insomnia: A Methodological Approach. *Behav Sleep Med*. 2020;18(3):334-344.
- NCT02848859

#### **Jernelov2012**

- Jernelöv S, Lekander M, Blom K, et al. Efficacy of a behavioral self-help treatment with or without therapist guidance for co-morbid and primary insomnia--a randomized controlled trial. *BMC Psychiatry*. 2012;12:5.
- Jernelöv S, Blom K, Hentati Isacsson N, et al. Very long-term outcome of cognitive behavioral therapy for insomnia: one- and ten-year follow-up of a randomized controlled trial. *Cogn Behav Ther*. 2022;51(1):72-88.
- Blom K, Hentati Isacsson N, Forsell E, et al. An investigation and replication of sleep-related cognitions, acceptance and behaviours as predictors of short- and long-term outcome in cognitive behavioural therapy for insomnia. *J Sleep Res*. 2021;30(5):e13376.
- NCT01105052

#### **Johann2020**

- Johann AF, Hertenstein E, Feige B, et al. Cognitive behavioural therapy for insomnia does not appear to have a substantial impact on early markers of cardiovascular disease: A preliminary randomized controlled trial. *J Sleep Res*. 2020;29(5):e13102.

#### **Jungquist2010**

- Jungquist CR, O'Brien C, Matteson-Rusby S, et al. The efficacy of cognitive-behavioral therapy for insomnia in patients with chronic pain. *Sleep Med*. 2010;11(3):302-309.
- Jungquist CR, Tra Y, Smith MT, et al. The durability of cognitive behavioral therapy for insomnia in patients with chronic pain. *Sleep Disord*. 2012;2012:679648.

#### **Kaku2012**

- Kaku A, Nishinoue N, Takano T, et al. Randomized controlled trial on the effects of a combined sleep hygiene education and behavioral approach program on sleep quality in workers with insomnia. *Ind Health*. 2012;50(1):52-59.

#### **Kaldo2015**

- Kaldo V, Jernelöv S, Blom K, et al. Guided internet cognitive behavioral therapy for insomnia compared to a control treatment - A randomized trial. *Behav Res Ther*. 2015;71:90-100.
- Blom K, Jernelöv S, Rück C, Lindefors N, Kaldo V. Three-Year Follow-Up of Insomnia and Hypnotics after Controlled Internet Treatment for Insomnia. *Sleep*. 2016;39(6):1267-1274.
- Kraepelien, M., Blom, K., Jernelöv, S. et al. Weekly Self-Ratings of Treatment Involvement and Their Relation to Symptom Reduction in Internet Cognitive Behavioral Therapy for Insomnia. *Cogn Ther Res*. 2021;45:262–271.
- Blom K, Hentati Isacsson N, Forsell E, et al. An investigation and replication of sleep-related cognitions, acceptance and behaviours as predictors of short- and long-term outcome in cognitive behavioural therapy for insomnia. *J Sleep Res*. 2021;30(5):e13376.

- Blom K. Guided internet-based treatment for insomnia and depression. *Dissertation*. 2022.

#### **Kaldo2020**

- Kaldo V, Bothelius K, Blom K, et al. An open-ended primary-care group intervention for insomnia based on a self-help book - A randomized controlled trial and 4-year follow-up. *J Sleep Res*. 2020;29(1):e12881.

#### **Kallestad2021**

- Kallestad H, Scott J, Vedaa Ø, et al. Mode of delivery of Cognitive Behavioral Therapy for Insomnia: a randomized controlled non-inferiority trial of digital and face-to-face therapy. *Sleep*. 2021;44(12):zsab185.
- Kjørstad K, Sivertsen B, Vedaa Ø, et al. The Effect of Reducing Insomnia Severity on Work- and Activity-Related Impairment. *Behav Sleep Med*. 2021;19(4):505-515.
- Scott J, Vedaa Ø, Sivertsen B, Langsrud K, Kallestad H. Using network intervention analysis to explore associations between participant expectations of and difficulties with cognitive behavioural therapy for insomnia and clinical outcome: A proof of principle study. *J Psychiatr Res*. 2022;148:73-83.
- NCT02044263

#### **Kalmbach2020**

- Kalmbach DA, Cheng P, O'Brien LM, et al. A randomized controlled trial of digital cognitive behavioral therapy for insomnia in pregnant women. *Sleep Med*. 2020;72:82-92.
- Kalmbach DA, Cheng P, Roth T, et al. Examining Patient Feedback and the Role of Cognitive Arousal in Treatment Non-response to Digital Cognitive-behavioral Therapy for Insomnia during Pregnancy. *Behav Sleep Med*. 2022;20(2):143-163.
- NCT03596879

#### **Kapella2011**

- Kapella MC, Herdegen JJ, Perlis ML, et al. Cognitive behavioral therapy for insomnia comorbid with COPD is feasible with preliminary evidence of positive sleep and fatigue effects. *Int J Chron Obstruct Pulmon Dis*. 2011;6:625-635.
- NCT01072292

#### **Kapella2022**

- Kapella M, Steffen A, Prasad B, et al. Therapy for insomnia with chronic obstructive pulmonary disease: a randomized trial of components. *J Clin Sleep Med*. 2022;10.5664/jcsm.10210.
- Kapella MC, Herdegen JJ, Laghi F, Steffen AD, Carley DW. Efficacy and mechanisms of behavioral therapy components for insomnia coexisting with chronic obstructive pulmonary disease: study protocol for a randomized controlled trial. *Trials*. 2016;17(1):258.
- NCT01973647

**Kennet2021**

- Kennett L, Bei B, Jackson ML. A Randomized Controlled Trial to Examine the Feasibility and Preliminary Efficacy of a Digital Mindfulness-Based Therapy for Improving Insomnia Symptoms. *Mindfulness*. 2021;12(10):2460-2472.
- ACTRN12620000398909

**Krieger2019**

- Krieger T, Urech A, Duss SB, et al. A randomized controlled trial comparing guided internet-based multi-component treatment and internet-based guided sleep restriction treatment to care as usual in insomnia. *Sleep Med*. 2019;62:43-52.
- NCT03110263

**Kuhn2022**

- Kuhn E, Miller KE, Puran D, et al. A Pilot Randomized Controlled Trial of the Insomnia Coach Mobile App to Assess Its Feasibility, Acceptability, and Potential Efficacy. *Behav Ther*. 2022;53(3):440-457.

**Kyle2020**

- Kyle SD, Hurry MED, Emsley R, et al. The effects of digital cognitive behavioral therapy for insomnia on cognitive function: a randomized controlled trial. *Sleep*. 2020;43(9):zsaa034.
- ISRCTN89237370

**Lami2018**

- Lami, M.J., Martínez, M.P., Miró, E. et al. Efficacy of Combined Cognitive-Behavioral Therapy for Insomnia and Pain in Patients with Fibromyalgia: A Randomized Controlled Trial. *Cogn Ther Res*. 2018;42:63–79.

**Lancee2012**

- Lancee J, van den Bout J, van Straten A, Spoormaker VI. Internet-delivered or mailed self-help treatment for insomnia?: a randomized waiting-list controlled trial. *Behav Res Ther*. 2012;50(1):22-29.
- NCT00851188

**Lancee2013**

- Lancee J, van den Bout J, Sorbi MJ, van Straten A. Motivational support provided via email improves the effectiveness of internet-delivered self-help treatment for insomnia: a randomized trial. *Behav Res Ther*. 2013;51(12):797-805.
- Lancee J, Sorbi MJ, Eisma MC, van Straten A, van den Bout J. The effect of support on internet-delivered treatment for insomnia: does baseline depression severity matter?. *Behav Ther*. 2014;45(4):507-516.
- NCT01456637

### **Lancee2015**

- Lancee J, Eisma MC, van Straten A, Kamphuis JH. Sleep-Related Safety Behaviors and Dysfunctional Beliefs Mediate the Efficacy of Online CBT for Insomnia: A Randomized Controlled Trial. *Cogn Behav Ther.* 2015;44(5):406-422.
- NCT01955928

### **Lancee2016**

- Lancee J, van Straten A, Morina N, Kaldo V, Kamphuis JH. Guided Online or Face-to-Face Cognitive Behavioral Treatment for Insomnia: A Randomized Wait-List Controlled Trial. *Sleep.* 2016;39(1):183-191.
- Lancee J, Eftting M, van der Zweerde T, van Daal L, van Straten A, Kamphuis JH. Cognitive processes mediate the effects of insomnia treatment: evidence from a randomized wait-list controlled trial. *Sleep Med.* 2019;54:86-93.
- NCT01955850

### **Lappalainen2019**

- Lappalainen P, Langrial S, Oinas-Kukkonen H, Muotka J, Lappalainen R. ACT for sleep - Internet-delivered self-help ACT for sub-clinical and clinical insomnia: A randomized controlled trial. *Journal of Contextual Behavioral Science*, 2019;12:119–127.

### **Latocha2022**

- Latocha KM, Løppenthin KB, Østergaard M, et al. The effect of group-based cognitive behavioural therapy for insomnia in patients with rheumatoid arthritis: A randomised controlled trial [published online ahead of print, 2022 Aug 11]. *Rheumatology.* 2022;keac448.
- Latocha KM, Løppenthin KB, Østergaard M, et al. Cognitive behavioural therapy for insomnia in patients with rheumatoid arthritis: protocol for the randomised, single-blinded, parallel-group Sleep-RA trial. *Trials.* 2020;21(1):440.
- NCT03766100

### **Leerssen2022**

- Leerssen J, Lakbila-Kamal O, Dekkers LMS, et al. Treating Insomnia with High Risk of Depression Using Therapist-Guided Digital Cognitive, Behavioral, and Circadian Rhythm Support Interventions to Prevent Worsening of Depressive Symptoms: A Randomized Controlled Trial. *Psychother Psychosom.* 2022;91(3):168-179.
- Leerssen J, Foster-Dingley JC, Lakbila-Kamal O, et al. Internet-guided cognitive, behavioral and chronobiological interventions in depression-prone insomnia subtypes: protocol of a randomized controlled prevention trial. *BMC Psychiatry.* 2020;20(1):163.
- NL7359

**Lichstein2000**

- Lichstein KL, Wilson NM, Johnson CT. Psychological treatment of secondary insomnia. *Psychol Aging*. 2000;15(2):232-240.

**Lichstein2001**

- Lichstein KL, Riedel BW, Wilson NM, Lester KW, Aguillard RN. Relaxation and sleep compression for late-life insomnia: a placebo-controlled trial. *J Consult Clin Psychol*. 2001;69(2):227-239.

**Liu2022**

- Liu Q, Wang C, Wang Y, et al. Mindfulness-based stress reduction with acupressure for sleep quality in breast cancer patients with insomnia undergoing chemotherapy: A randomized controlled trial. *Eur J Oncol Nurs*. 2022;61:102219. doi:10.1016/j.ejon.2022.102219
- ChiCTR190002561

**Lopez2019**

- Lopez R, Evangelista E, Barateau L, et al. French Language Online Cognitive Behavioral Therapy for Insomnia Disorder: A Randomized Controlled Trial. *Front Neurol*. 2019;10:1273.
- NCT02539862

**Lorenz2019**

- Lorenz N, Heim E, Roetger A, Birrer E, Maercker A. Randomized Controlled Trial to Test the Efficacy of an Unguided Online Intervention with Automated Feedback for the Treatment of Insomnia. *Behav Cogn Psychother*. 2019;47(3):287-302.
- Heim E, Rötger A, Lorenz N, Maercker A. Working alliance with an avatar: How far can we go with internet interventions?. *Internet Interv*. 2018;11:41-46.
- NCT02629913

**Lovato2014**

- Lovato N, Lack L, Wright H, Kennaway DJ. Evaluation of a brief treatment program of cognitive behavior therapy for insomnia in older adults. *Sleep*. 2014;37(1):117-126.
- Lovato N, Micic G, Lack L. Sleep misestimation among older adults suffering from insomnia with short and normal objective sleep duration and the effects of cognitive behavior therapy. *Sleep*. 2021;44(5):zsaa250.
- ACTRN12620000883910

**Low2020**

- Low T, Conduit R, Varma P, Meaklim H, Jackson ML. Treating subclinical and clinical symptoms of insomnia with a mindfulness-based smartphone application: A pilot study. *Internet Interv.* 2020;21:100335.

#### **Maguen2021**

- Maguen S, Gloria R, Huggins J, et al. Brief behavioral treatment for insomnia improves psychosocial functioning in veterans: results from a randomized controlled trial. *Sleep.* 2021;44(3):zsaa205.
- Holder N, Kanady JC, Straus LD, et al. Reducing Barriers to Behavioral Treatments for Insomnia: A Qualitative Examination of Veterans' Perspectives of BBTI. *Behav Sleep Med.* 2022;20(1):37-49.
- Ranney RM, Gloria R, Metzler TJ, Huggins J, Neylan TC, Maguen S. Brief behavioral treatment for insomnia decreases trauma-related nightmare frequency in veterans. *J Clin Sleep Med.* 2022;18(7):1831-1839.
- NCT02571452

#### **Majd2020**

- Rajabi Majd N, Broström A, Ulander M, et al. Efficacy of a Theory-Based Cognitive Behavioral Technique App-Based Intervention for Patients With Insomnia: Randomized Controlled Trial. *J Med Internet Res.* 2020;22(4):e15841.
- NCT03605732

#### **Manber2008**

- Manber R, Edinger JD, Gress JL, San Pedro-Salcedo MG, Kuo TF, Kalista T. Cognitive behavioral therapy for insomnia enhances depression outcome in patients with comorbid major depressive disorder and insomnia. *Sleep.* 2008;31(4):489-495.
- NCT00149825

#### **Manber2016**

- Manber R, Buysse DJ, Edinger J, et al. Efficacy of Cognitive-Behavioral Therapy for Insomnia Combined With Antidepressant Pharmacotherapy in Patients With Comorbid Depression and Insomnia: A Randomized Controlled Trial. *J Clin Psychiatry.* 2016;77(10):e1316-e1323.
- Edinger JD, Manber R, Buysse DJ, et al. Are Patients with Childhood Onset of Insomnia and Depression More Difficult to Treat Than Are Those with Adult Onsets of These Disorders? A Report from the TRIAD Study. *J Clin Sleep Med.* 2017;13(2):205-213.
- Bei B, Asarnow LD, Krystal A, Edinger JD, Buysse DJ, Manber R. Treating insomnia in depression: Insomnia related factors predict long-term depression trajectories. *J Consult Clin Psychol.* 2018;86(3):282-293.

- Asarnow LD, Bei B, Krystal A, et al. Circadian Preference as a Moderator of Depression Outcome Following Cognitive Behavioral Therapy for Insomnia Plus Antidepressant Medications: A Report From the TRIAD Study. *J Clin Sleep Med*. 2019;15(4):573-580.
- NCT00767624

#### **Manber2019**

- Manber R, Bei B, Simpson N, et al. Cognitive Behavioral Therapy for Prenatal Insomnia: A Randomized Controlled Trial. *Obstet Gynecol*. 2019;133(5):911-919.

#### **Mao2018**

- Mao H, Wu J, Xu Y, Liu Y, Tang X. Effectiveness of sleep self-management group intervention in Chinese patients with insomnia disorder. *Perspect Psychiatr Care*. 2018;54(2):156-161.

#### **Marino2001**

- Marino, A. Treating chronic insomnia: A cognitive-behavioural group therapy approach. Dissertation. 2001.

#### **Maritinez2014**

- Martínez MP, Miró E, Sánchez AI, et al. Cognitive-behavioral therapy for insomnia and sleep hygiene in fibromyalgia: a randomized controlled trial. *J Behav Med*. 2014;37(4):683-697.

#### **Marks2023**

- Marks E, Hallsworth C, Vogt F, Klein H, McKenna L. Cognitive behavioural therapy for insomnia (CBTi) as a treatment for tinnitus-related insomnia: a randomised controlled trial. *Cogn Behav Ther*. 2023;52(2):91-109. doi:10.1080/16506073.2022.2084155
- NCT03386123

#### **Matthews2014**

- Matthews EE, Berger AM, Schmiege SJ, et al. Cognitive behavioral therapy for insomnia outcomes in women after primary breast cancer treatment: a randomized, controlled trial. *Oncol Nurs Forum*. 2014;41(3):241-253.

#### **McCrae2007**

- McCrae CS, McGovern R, Lukefahr R, Stripling AM. Research Evaluating Brief Behavioral Sleep Treatments for Rural Elderly (RESTORE): a preliminary examination of effectiveness. *Am J Geriatr Psychiatry*. 2007;15(11):979-982.

#### **McCrae2019**



- McCrae CS, Williams J, Roditi D, et al. Cognitive behavioral treatments for insomnia and pain in adults with comorbid chronic insomnia and fibromyalgia: clinical outcomes from the SPIN randomized controlled trial. *Sleep*. 2019;42(3):zsy234.
- Mundt JM, Crew EC, Krietsch K, et al. Measuring Treatment Outcomes in Comorbid Insomnia and Fibromyalgia: Concordance of Subjective and Objective Assessments. *J Clin Sleep Med*. 2016;12(2):215-223.
- McCrae CS, Mundt JM, Curtis AF, et al. Gray Matter Changes Following Cognitive Behavioral Therapy for Patients With Comorbid Fibromyalgia and Insomnia: A Pilot Study. *J Clin Sleep Med*. 2018;14(9):1595-1603.
- McCrae CS, Curtis AF, Miller MB, et al. Effect of cognitive behavioural therapy on sleep and opioid medication use in adults with fibromyalgia and insomnia. *J Sleep Res*. 2020;29(6):e13020.
- NCT02001077

### **McCrae2020**

- McCrae CS, Curtis AF, Williams JM, et al. Effects of Brief Behavioral Treatment for Insomnia on Daily Associations between Self-Reported Sleep and Objective Cognitive Performance in Older Adults. *Behav Sleep Med*. 2020;18(5):577-588.
- Chan WS, Williams J, Dautovich ND, et al. Night-to-Night Sleep Variability in Older Adults With Chronic Insomnia: Mediators and Moderators in a Randomized Controlled Trial of Brief Behavioral Therapy (BBT-I). *J Clin Sleep Med*. 2017;13(11):1243-1254.
- McCrae CS, Curtis AF, Nair N, et al. Impact of a brief behavioral treatment for insomnia (BBTi) on metacognition in older adults. *Sleep Med*. 2021;80:286-293.
- NCT02967185

### **McCurry2016**

- McCurry SM, Guthrie KA, Morin CM, et al. Telephone-Based Cognitive Behavioral Therapy for Insomnia in Perimenopausal and Postmenopausal Women With Vasomotor Symptoms: A MsFLASH Randomized Clinical Trial. *JAMA Intern Med*. 2016;176(7):913-920.
- Kauffman RP. Telephone-based CBT reduced insomnia severity more than menopause education in menopausal women. *Ann Intern Med*. 2016;165(6):JC30.
- NCT01936441

### **McCurry2021**

- McCurry SM, Zhu W, Von Korff M, et al. Effect of Telephone Cognitive Behavioral Therapy for Insomnia in Older Adults With Osteoarthritis Pain: A Randomized Clinical Trial. *JAMA Intern Med*. 2021;181(4):530-538.

- McCurry SM, Von Korff M, Morin CM, et al. Telephone interventions for co-morbid insomnia and osteoarthritis pain: The OsteoArthritis and Therapy for Sleep (OATS) randomized trial design. *Contemp Clin Trials*. 2019;87:105851.
- Yeung K, Zhu W, McCurry SM, et al. Cost-effectiveness of telephone cognitive behavioral therapy for osteoarthritis-related insomnia. *J Am Geriatr Soc*. 2022;70(1):188-199.
- Vitiello MV, Zhu W, Von Korff M, et al. Long-term improvements in sleep, pain, depression, and fatigue in older adults with comorbid osteoarthritis pain and insomnia. *Sleep*. 2022;45(2):zsab231.
- NCT02946957

#### **Means2000**

- Means MK, Lichstein KL, Epperson MT, Johnson CT. Relaxation therapy for insomnia: nighttime and day time effects. *Behav Res Ther*. 2000;38(7):665-678.

#### **Milby1993**

- Milby JB, Williams V, Hall JN, Khuder S, McGill T, Wooten V. Effectiveness of combined triazolam-behavioral therapy for primary insomnia. *Am J Psychiatry*. 1993;150(8):1259-1260.

#### **Miller2021**

- Miller MB, Deroche CB, Freeman LK, et al. Cognitive behavioral therapy for insomnia among young adults who are actively drinking: a randomized pilot trial. *Sleep*. 2021;44(2):zsaa171.
- Miller MB, Freeman L, Park CJ, et al. Insomnia treatment effects among young adult drinkers: Secondary outcomes of a randomized pilot trial. *Alcohol Clin Exp Res*. 2021;45(5):1136-1148.  
doi:10.1111/acer.14603
- Miller MB, Carpenter RW, Freeman LK, Curtis AF, Yurasek AM, McCrae CS. Cannabis use as a moderator of cognitive behavioral therapy for insomnia. *J Clin Sleep Med*. 2022;18(4):1047-1054.
- NCT03627832

#### **Miller2023**

- Miller MB, Carpenter RW, Freeman LK, et al. Effect of Cognitive Behavioral Therapy for Insomnia on Alcohol Treatment Outcomes Among US Veterans: A Randomized Clinical Trial [published online ahead of print, 2023 Jun 21]. *JAMA Psychiatry*. 2023;e231971. doi:10.1001/jamapsychiatry.2023.1971
- NCT03806491

#### **Mimeault1999**

- Mimeault V, Morin CM. Self-help treatment for insomnia: bibliotherapy with and without professional guidance. *J Consult Clin Psychol*. 1999;67(4):511-519.

#### **Miro2011**

- Miró E, Lupiáñez J, Martínez MP, et al. Cognitive-behavioral therapy for insomnia improves attentional function in fibromyalgia syndrome: a pilot, randomized controlled trial. *J Health Psychol.* 2011;16(5):770-782.

#### **Morawetz1989**

- Morawetz, D. Behavioral self-help treatment for insomnia: A controlled evaluation. *Behavior Therapy.* 1989;20(3):365-379.

#### **Morgan2012**

- Morgan K, Gregory P, Tomeny M, David BM, Gascoigne C. Self-help treatment for insomnia symptoms associated with chronic conditions in older adults: a randomized controlled trial. *J Am Geriatr Soc.* 2012;60(10):1803-1810.

#### **Morin1988**

- Morin CM, Azrin NH. Behavioral and cognitive treatments of geriatric insomnia. *J Consult Clin Psychol.* 1988;56(5):748-753.

#### **Morin1993**

- Morin CM, Kowatch RA, Barry T, Walton E. Cognitive-behavior therapy for late-life insomnia. *J Consult Clin Psychol.* 1993;61(1):137-146.

#### **Morin1999**

- Morin CM, Colecchi C, Stone J, Sood R, Brink D. Behavioral and pharmacological therapies for late-life insomnia: a randomized controlled trial. *JAMA.* 1999;281(11):991-999.
- Morin CM, Blais F, Savard J. Are changes in beliefs and attitudes about sleep related to sleep improvements in the treatment of insomnia?. *Behav Res Ther.* 2002;40(7):741-752.

#### **NCT00127790**

- Treatment of Insomnia Secondary to Chronic Pain

#### **NCT01011218**

- Management of Insomnia in Breast Cancer Patients

#### **NCT01987089**

- The Efficacy of CBT-I in Alcoholics & Its Effects on Remission & Relapse

#### **NCT02613364**

- Yoga, Survivorship Health Education, and Cognitive Behavioral Therapy in Reducing Insomnia in Cancer Survivors (YOCAS-II)

#### **NCT03964974**

- Reducing Cannabis Use for Sleep Among Adults Using Medical Cannabis (CannSleep)

#### **NorellClarke2015**

- Norell-Clarke A, Jansson-Fröjmark M, Tillfors M, Holländare F, Engström I. Group cognitive behavioural therapy for insomnia: Effects on sleep and depressive symptomatology in a sample with comorbidity. *Behav Res Ther.* 2015;74:80-93.
- Norell-Clarke A, Tillfors M, Jansson-Fröjmark M, Holländare F, Engström I. How Does Cognitive Behavioral Therapy for Insomnia Work? An Investigation of Cognitive Processes and Time in Bed as Outcomes and Mediators in a Sample With Insomnia and Depressive Symptomatology. *International Journal of Cognitive Therapy.* 2017;10(4):304-329.
- Norell-Clarke A, Tillfors M, Jansson-Fröjmark M, Holländare F, Engström I. Does Mid-Treatment Insomnia Severity Mediate between Cognitive Behavioural Therapy for Insomnia and Post-Treatment Depression? An Investigation in a Sample with Comorbid Insomnia and Depressive Symptomatology. *Behav Cogn Psychother.* 2018;46(6):726-737.

#### **Okajima2020**

- Okajima I, Akitomi J, Kajiyama I, Ishii M, Murakami H, Yamaguchi M. Effects of a Tailored Brief Behavioral Therapy Application on Insomnia Severity and Social Disabilities Among Workers With Insomnia in Japan: A Randomized Clinical Trial. *JAMA Netw Open.* 2020;3(4):e202775.

#### **Okajima2021**

- Okajima I, Tanizawa N, Harata M, et al. Can an E-Mail-Delivered CBT for Insomnia Validated in the West Be Effective in the East? A Randomized Controlled Trial. *Int J Environ Res Public Health.* 2021;19(1):186.
- Ubara A, Tanizawa N, Harata M, et al. How Does E-mail-Delivered Cognitive Behavioral Therapy Work for Young Adults (18-28 Years) with Insomnia? Mediators of Changes in Insomnia, Depression, Anxiety, and Stress. *Int J Environ Res Public Health.* 2022;19(8):4423.
- UMIN000043685

#### **Ong2018**

- Ong JC, Xia Y, Smith-Mason CE, Manber R. A randomized controlled trial of mindfulness meditation for chronic insomnia: Effects on daytime symptoms and cognitive-emotional arousal. *Mindfulness.* 2018;9(6):1702–1712.

- Ong JC, Hedeker D, Wyatt JK, Manber R. Examining the Variability of Sleep Patterns during Treatment for Chronic Insomnia: Application of a Location-Scale Mixed Model. *J Clin Sleep Med*. 2016;12(6):797-804.
- Goldstein MR, Turner AD, Dawson SC, et al. Increased high-frequency NREM EEG power associated with mindfulness-based interventions for chronic insomnia: Preliminary findings from spectral analysis. *J Psychosom Res*. 2019;120:12-19.
- NCT00768781

### **Ong2020**

- Ong JC, Crawford MR, Dawson SC, et al. A randomized controlled trial of CBT-I and PAP for obstructive sleep apnea and comorbid insomnia: main outcomes from the MATRICS study. *Sleep*. 2020;43(9):zsaa041.
- Crawford MR, Turner AD, Wyatt JK, Fogg LF, Ong JC. Evaluating the treatment of obstructive sleep apnea comorbid with insomnia disorder using an incomplete factorial design. *Contemp Clin Trials*. 2016;47:146-152.
- Tu AY, Crawford MR, Dawson SC, et al. A randomized controlled trial of cognitive behavioral therapy for insomnia and PAP for obstructive sleep apnea and comorbid insomnia: effects on nocturnal sleep and daytime performance. *J Clin Sleep Med*. 2022;18(3):789-800.
- NCT01785303

### **Oswald2022**

- Oswald LB, Morales-Cruz J, Eisel SL, et al. Pilot randomized controlled trial of eHealth cognitive-behavioral therapy for insomnia among Spanish-speaking breast cancer survivors. *J Behav Med*. 2022;45(3):503-508.
- NCT04101526

### **Padron2022**

- Padron A, McCrae CS, Robinson ME, et al. Impacts of Cognitive Behavioral Therapy for Insomnia and Pain on Sleep in Women with Gynecologic Malignancies: A Randomized Controlled Trial. *Behav Sleep Med*. 2022;20(4):460-476.
- NCT02609880

### **Palesh2018**

- Palesh O, Scheiber C, Kesler S, et al. Feasibility and acceptability of brief behavioral therapy for cancer-related insomnia: effects on insomnia and circadian rhythm during chemotherapy: a phase II randomised multicentre controlled trial. *Br J Cancer*. 2018;119(3):274-281.
- Palesh O, Scheiber C, Kesler S, et al. Secondary outcomes of a behavioral sleep intervention: A randomized clinical trial. *Health Psychol*. 2019;38(3):196-205.

- NCT02002533

#### **Palesh2020**

- Palesh O, Solomon N, Hofmeister E, et al. A novel approach to management of sleep-associated problems in patients with breast cancer (MOSAIC) during chemotherapy : A pilot study. *Sleep*. 2020;43(10):zsaa070.

#### **Pallesen2003**

- Pallesen S, Nordhus IH, Kvale G, et al. Behavioral treatment of insomnia in older adults: an open clinical trial comparing two interventions. *Behav Res Ther*. 2003;41(1):31-48.

#### **Patel2017**

- Patel S, Ojo O, Genc G, et al. A Computerized Cognitive behavioral therapy Randomized, Controlled, pilot trial for insomnia in Parkinson Disease (ACCORD-PD). *J Clin Mov Disord*. 2017;4:16.

#### **Perlis2004**

- Perlis ML, Smith MT, Orff H, et al. The effects of modafinil and cognitive behavior therapy on sleep continuity in patients with primary insomnia. *Sleep*. 2004;27(4):715-725.

#### **Perrault2022**

- Perrault AA, Pomares FB, Smith D, et al. Effects of cognitive behavioral therapy for insomnia on subjective and objective measures of sleep and cognition. *Sleep Med*. 2022;97:13-26.

- ISRCTN13983243

#### **Pigeon2017**

- Pigeon WR, Funderburk J, Bishop TM, Crean HF. Brief cognitive behavioral therapy for insomnia delivered to depressed veterans receiving primary care services: A pilot study. *J Affect Disord*. 2017;217:105-111.

#### **Pigeon2019**

- Pigeon WR, Funderburk JS, Cross W, Bishop TM, Crean HF. Brief CBT for insomnia delivered in primary care to patients endorsing suicidal ideation: a proof-of-concept randomized clinical trial. *Transl Behav Med*. 2019;9(6):1169-1177.

- Bishop TM, Crean HF, Funderburk JS, Pigeon WR. Initial Session Effects of Brief Cognitive Behavioral Therapy for Insomnia: A Secondary Analysis of A Small Randomized Pilot Trial. *Behav Sleep Med*. 2021;19(6):769-782.

- NCT02248675

### **Pigeon2022**

- Pigeon WR, Crean HF, Cerulli C, Gallegos AM, Bishop TM, Heffner KL. A Randomized Clinical Trial of Cognitive-Behavioral Therapy for Insomnia to Augment Posttraumatic Stress Disorder Treatment in Survivors of Interpersonal Violence. *Psychother Psychosom.* 2022;91(1):50-62.
- Pigeon WR, Heffner KL, Crean H, et al. Responding to the need for sleep among survivors of interpersonal violence: A randomized controlled trial of a cognitive-behavioral insomnia intervention followed by PTSD treatment. *Contemp Clin Trials.* 2015;45(Pt B):252-260.
- NCT01743339

### **Pillai2015**

- Pillai V, Anderson JR, Cheng P, et al. The Anxiolytic Effects of Cognitive Behavior Therapy for Insomnia: Preliminary Results from a Web-delivered Protocol. *J Sleep Med Disord.* 2015;2(2):1017.

### **Prados2020**

- Prados G, Miró E, Martínez MP, Sánchez AI, Lami MJ, Cáliz R. Combined cognitive-behavioral therapy for fibromyalgia: Effects on polysomnographic parameters and perceived sleep quality. *Int J Clin Health Psychol.* 2020;20(3):232-242.

### **Quintiliani2020**

- Quintiliani MI, Imperatori C, Testani E, et al. Usefulness of psychoeducational intervention in chronic insomnia: an actigraphic study. *J Ment Health.* 2020;29(1):20-26.

### **Redeker2015**

- Redeker NS, Jeon S, Andrews L, Cline J, Jacoby D, Mohsenin V. Feasibility and Efficacy of a Self-Management Intervention for Insomnia in Stable Heart Failure. *J Clin Sleep Med.* 2015;11(10):1109-1119.
- Redeker NS, Conley S, Anderson G, et al. Effects of Cognitive Behavioral Therapy for Insomnia on Sleep, Symptoms, Stress, and Autonomic Function Among Patients With Heart Failure. *Behav Sleep Med.* 2020;18(2):190-202.
- Redeker NS, Jeon S, Andrews L, Cline J, Mohsenin V, Jacoby D. Effects of Cognitive Behavioral Therapy for Insomnia on Sleep-Related Cognitions Among Patients With Stable Heart Failure. *Behav Sleep Med.* 2019;17(3):342-354.
- NCT02827799

### **Redeker2022**

- Redeker NS, Yaggi HK, Jacoby D, et al. Cognitive behavioral therapy for insomnia has sustained effects on insomnia, fatigue, and function among people with chronic heart failure and insomnia: the HeartSleep Study. *Sleep.* 2022;45(1):zsab252.

- Redeker NS, Knies AK, Hollenbeak C, et al. Cognitive behavioral therapy for insomnia in stable heart failure: Protocol for a randomized controlled trial. *Contemp Clin Trials*. 2017;55:16-23.
- Gaffey AE, Jeon S, Conley S, et al. Perceived Stress, Subjective, and Objective Symptoms of Disturbed Sleep in Men and Women with Stable Heart Failure. *Behav Sleep Med*. 2021;19(3):363-377.
- O'Connell M, Jeon S, Conley S, Linsky S, Redeker NS. Sleep, Stress, and Symptoms Among People With Heart Failure During the COVID-19 Pandemic. *J Cardiovasc Nurs*. 2022;10.1097/JCN.0000000000000906.
- NCT02660385

#### **Ritterband2009**

- Ritterband LM, Thorndike FP, Gonder-Frederick LA, et al. Efficacy of an Internet-based behavioral intervention for adults with insomnia. *Arch Gen Psychiatry*. 2009;66(7):692-698.
- Thorndike FP, Ritterband LM, Gonder-Frederick LA, Lord HR, Ingersoll KS, Morin CM. A randomized controlled trial of an internet intervention for adults with insomnia: effects on comorbid psychological and fatigue symptoms. *J Clin Psychol*. 2013;69(10):1078-1093.
- Shaffer KM, Hedeker D, Morin CM, Ingersoll K, Thorndike F, Ritterband LM. Intraindividual variability in sleep schedule: effects of an internet-based cognitive-behavioral therapy for insomnia program and its relation with symptom remission. *Sleep*. 2020;43(12):zsaa115.
- Shaffer KM, Finkelstein EA, Camacho F, Ingersoll KS, Thorndike F, Ritterband LM. Effects of an Internet-Based Cognitive Behavioral Therapy for Insomnia Program on Work Productivity: A Secondary Analysis. *Ann Behav Med*. 2021;55(6):592-599.
- NCT00328250

#### **Ritterband2012**

- Ritterband LM, Bailey ET, Thorndike FP, Lord HR, Farrell-Carnahan L, Baum LD. Initial evaluation of an Internet intervention to improve the sleep of cancer survivors with insomnia. *Psychooncology*. 2012;21(7):695-705.

#### **Ritterband2017**

- Ritterband LM, Thorndike FP, Ingersoll KS, et al. Effect of a Web-Based Cognitive Behavior Therapy for Insomnia Intervention With 1-Year Follow-up: A Randomized Clinical Trial. *JAMA Psychiatry*. 2017;74(1):68-75.
- Chow PI, Ingersoll KS, Thorndike FP, et al. Cognitive mechanisms of sleep outcomes in a randomized clinical trial of internet-based cognitive behavioral therapy for insomnia. *Sleep Med*. 2018;47:77-85.
- Chow PI, Gonzalez BD, Ingersoll KS, et al. A secondary analysis of the role of geography in engagement and outcomes in a clinical trial of an efficacious Internet intervention for insomnia. *Internet Interv*. 2019;18:100294.



- Shaffer KM, Camacho F, Lord HR, et al. Do treatment effects of a web-based cognitive behavioral therapy for insomnia intervention differ for users with and without pain interference? A secondary data analysis. *J Behav Med.* 2020;43(3):503-510.
- NCT01438697

#### **Robabeh2015**

- Robabeh S Md, Jafar MM Md, Sharareh H Md, Maryam HR Md, Masoumeh E Ma. The Effect of Cognitive Behavior Therapy in Insomnia due to Methadone Maintenance Therapy: A Randomized Clinical Trial. *Iran J Med Sci.* 2015;40(5):396-403.

#### **Roscoe2015**

- Roscoe JA, Garland SN, Heckler CE, et al. Randomized placebo-controlled trial of cognitive behavioral therapy and armodafinil for insomnia after cancer treatment. *J Clin Oncol.* 2015;33(2):165-171.
- Garland SN, Roscoe JA, Heckler CE, et al. Effects of armodafinil and cognitive behavior therapy for insomnia on sleep continuity and daytime sleepiness in cancer survivors. *Sleep Med.* 2016;20:18-24.
- Peoples AR, Garland SN, Perlis ML, et al. Effects of cognitive behavioral therapy for insomnia and armodafinil on quality of life in cancer survivors: a randomized placebo-controlled trial. *J Cancer Surviv.* 2017;11(3):401-409.
- Kamen C, Garland SN, Heckler CE, et al. Social Support, Insomnia, and Adherence to Cognitive Behavioral Therapy for Insomnia After Cancer Treatment. *Behav Sleep Med.* 2019;17(1):70-80.
- NCT01091974

#### **Rosen2000**

- Rosen RC, Lewin DS, Goldberg L, Woolfolk RL. Psychophysiological insomnia: combined effects of pharmacotherapy and relaxation-based treatments. *Sleep Med.* 2000;1(4):279-288.

#### **Rybarczyk2005**

- Rybarczyk B, Stepanski E, Fogg L, Lopez M, Barry P, Davis A. A placebo-controlled test of cognitive-behavioral therapy for comorbid insomnia in older adults. *J Consult Clin Psychol.* 2005;73(6):1164-1174.
- Lund HG, Rybarczyk BD, Perrin PB, Leszczyszyn D, Stepanski E. The discrepancy between subjective and objective measures of sleep in older adults receiving CBT for comorbid insomnia. *J Clin Psychol.* 2013;69(10):1108-1120.
- Vitiello MV, Rybarczyk B, Von Korff M, Stepanski EJ. Cognitive behavioral therapy for insomnia improves sleep and decreases pain in older adults with co-morbid insomnia and osteoarthritis. *J Clin Sleep Med.* 2009;5(4):355-362.

#### **Sadler2018**

- Sadler P, McLaren S, Klein B, Harvey J, Jenkins M. Cognitive behavior therapy for older adults with insomnia and depression: a randomized controlled trial in community mental health services. *Sleep*. 2018;41(8):10.1093/sleep/zsy104.
- Sadler P, McLaren S, Klein B, Jenkins M, Harvey J. Cognitive behaviour therapy for older adults experiencing insomnia and depression in a community mental health setting: Study protocol for a randomised controlled trial. *Trials*. 2015;16:538.
- Sadler P, McLaren S, Klein B, Jenkins M. Cognitive behaviour therapy for insomnia and depression: qualitative reflections from older adults who participated in a randomised controlled trial. *Aging Ment Health*. 2020;24(6):932-938.
- ACTRN12615000067572

### **Sandlund2017**

- Sandlund C, Hetta J, Nilsson GH, Ekstedt M, Westman J. Improving insomnia in primary care patients: A randomized controlled trial of nurse-led group treatment. *Int J Nurs Stud*. 2017;72:30-41.
- Sandlund C, Hetta J, Nilsson GH, Ekstedt M, Westman J. Impact of group treatment for insomnia on daytime symptomatology: Analyses from a randomized controlled trial in primary care. *Int J Nurs Stud*. 2018;85:126-135.
- NCT01731223

### **Sato2019**

- Sato D, Yoshinaga N, Nagai E, Nagai K, Shimizu E. Effectiveness of Internet-Delivered Computerized Cognitive Behavioral Therapy for Patients With Insomnia Who Remain Symptomatic Following Pharmacotherapy: Randomized Controlled Exploratory Trial. *J Med Internet Res*. 2019;21(4):e12686.
- Sato D, Yoshinaga N, Nagai E, Hanaoka H, Sato Y, Shimizu E. Randomised controlled trial on the effect of internet-delivered computerised cognitive-behavioural therapy on patients with insomnia who remain symptomatic following hypnotics: a study protocol. *BMJ Open*. 2018;8(1):e018220.
- JPRN-UMIN000021509

### **Sato2022**

- Sato D, Sekizawa Y, Sutoh C, et al. Effectiveness of Unguided Internet-Based Cognitive Behavioral Therapy and the Three Good Things Exercise for Insomnia: 3-Arm Randomized Controlled Trial. *J Med Internet Res*. 2022;24(2):e28747.
- JPRN-UMIN000034927

### **Savard2005**

- Savard J, Simard S, Ivers H, Morin CM. Randomized study on the efficacy of cognitive-behavioral therapy for insomnia secondary to breast cancer, part I: Sleep and psychological effects. *J Clin Oncol*. 2005;23(25):6083-6096.

- Savard J, Simard S, Ivers H, Morin CM. Randomized study on the efficacy of cognitive-behavioral therapy for insomnia secondary to breast cancer, part II: Immunologic effects. *J Clin Oncol*. 2005;23(25):6097-6106.

#### **Savard2014**

- Savard J, Ivers H, Savard MH, Morin CM. Is a video-based cognitive behavioral therapy for insomnia as efficacious as a professionally administered treatment in breast cancer? Results of a randomized controlled trial. *Sleep*. 2014;37(8):1305-1314.
- Savard J, Ivers H, Savard MH, Morin CM. Long-Term Effects of Two Formats of Cognitive Behavioral Therapy for Insomnia Comorbid with Breast Cancer. *Sleep*. 2016;39(4):813-823.
- Savard J, Savard MH, Ivers H. Moderators of Treatment Effects of a Video-Based Cognitive-Behavioral Therapy for Insomnia Comorbid With Cancer. *Behav Sleep Med*. 2018;16(3):294-309.
- Savard J, Ivers H, Morin CM, Lacroix G. Video cognitive-behavioral therapy for insomnia in cancer patients: A cost-effective alternative. *Psychooncology*. 2021;30(1):44-51.
- NCT00674830

#### **Schuffelen2023**

- Schuffelen J, Maurer LF, Lorenz N, Rötger A, Pietrowsky R, Giesemann A. The clinical effects of digital cognitive behavioral therapy for insomnia in a heterogenous study sample: Results from a randomized controlled trial [published online ahead of print, 2023 Jul 10]. *Sleep*. 2023;zsad184.  
doi:10.1093/sleep/zsad184
- DRKS00024477

#### **Sgoifo2017**

- Sgoifo A, Bignamini A, La Mantia L, et al. Integrated Imaginative Distention Therapy to Cope with Fatigue. DIMMI SI Study: The First Randomized Controlled Trial in Multiple Sclerosis. *Neurol Ther*. 2017;6(2):213-223.
- NCT02290990

#### **Sheaves2018**

- Sheaves B, Freeman D, Isham L, et al. Stabilising sleep for patients admitted at acute crisis to a psychiatric hospital (OWLS): an assessor-blind pilot randomised controlled trial. *Psychol Med*. 2018;48(10):1694-1704.
- ISRCTN15324584

#### **Shimamoto2022**

- Shimamoto T, Furihata R, Nakagami Y, et al. Providing Brief Personalized Therapies for Insomnia Among Workers Using a Sleep Prompt App: Randomized Controlled Trial. *J Med Internet Res*. 2022;24(7):e36862.
- UMIN000042263

### **Shin2023**

- Shin JW, Kim S, Shin YJ, Park B, Park S. Comparison of Acceptance and Commitment Therapy (ACT) and Cognitive Behavior Therapy (CBT) for Chronic Insomnia: A Pilot Randomized Controlled Trial. *Nat Sci Sleep*. 2023;15:523-531. Published 2023 Jul 5. doi:10.2147/NSS.S409981
- KCT0008296

### **Short2021**

- Short NA, Zvolensky MJ, Schmidt NB. A pilot randomized clinical trial of Brief Behavioral Treatment for Insomnia to reduce problematic cannabis use among trauma-exposed young adults. *J Subst Abuse Treat*. 2021;131:108537.

### **Siebmans2021**

- Siebmans S, Johansson P, Ulander M, Johansson L, Andersson G, Broström A. The effect of nurse-led Internet-based cognitive behavioural therapy for insomnia on patients with cardiovascular disease: A randomized controlled trial with 6-month follow-up. *Nurs Open*. 2021;8(4):1755-1768.
- NCT03938805

### **Siengsukon2020**

- Siengsukon CF, Alshehri M, Williams C, Drerup M, Lynch S. Feasibility and treatment effect of cognitive behavioral therapy for insomnia in individuals with multiple sclerosis: A pilot randomized controlled trial. *Mult Scler Relat Disord*. 2020;40:101958.
- Williams-Cooke C, LeSuer L, Drerup M, Siengsukon C. The Impact of Cognitive Behavioral Therapy for Insomnia on Sleep Log and Actigraphy Outcomes in People with Multiple Sclerosis: A Secondary Analysis. *Nat Sci Sleep*. 2021;13:1865-1874.
- NCT03216889

### **Siengsukon2021**

- Siengsukon CF, Beck ES Jr, Drerup M. Feasibility and Treatment Effect of a Web-Based Cognitive Behavioral Therapy for Insomnia Program in Individuals with Multiple Sclerosis: A Pilot Randomized Controlled Trial. *Int J MS Care*. 2021;23(3):107-113.
- NCT03783585

### **Simeit2004**

- Simeit R, Deck R, Conta-Marx B. Sleep management training for cancer patients with insomnia. *Support Care Cancer*. 2004;12(3):176-183.

### **Smith2015**

- Smith MT, Finan PH, Buenaver LF, et al. Cognitive-behavioral therapy for insomnia in knee osteoarthritis: a randomized, double-blind, active placebo-controlled clinical trial. *Arthritis Rheumatol*. 2015;67(5):1221-1233.
- Salwen JK, Smith MT, Finan PH. Mid-Treatment Sleep Duration Predicts Clinically Significant Knee Osteoarthritis Pain reduction at 6 months: Effects From a Behavioral Sleep Medicine Clinical Trial. *Sleep*. 2017;40(2):zsw064.
- Lerman SF, Finan PH, Smith MT, Haythornthwaite JA. Psychological interventions that target sleep reduce pain catastrophizing in knee osteoarthritis. *Pain*. 2017;158(11):2189-2195.
- NCT00592449

### **Smitherman2016**

- Smitherman TA, Walters AB, Davis RE, et al. Randomized Controlled Pilot Trial of Behavioral Insomnia Treatment for Chronic Migraine With Comorbid Insomnia. *Headache*. 2016;56(2):276-291.

### **Soeffing2008**

- Soeffing JP, Lichstein KL, Nau SD, et al. Psychological treatment of insomnia in hypnotic-dependant older adults. *Sleep Med*. 2008;9(2):165-171.

### **Song2020**

- Song ML, Park KM, Motamedi GK, Cho YW. Cognitive behavioral therapy for insomnia in restless legs syndrome patients. *Sleep Med*. 2020;74:227-234.

### **Speed2022**

- Speed TJ, Hanks L, Turner G, et al. A comparison of cognitive behavioral therapy for insomnia to standard of care in an outpatient substance use disorder clinic embedded within a therapeutic community: a RE-AIM framework evaluation. *Trials*. 2022 Nov;23(1):965.
- NCT03208855

### **Store2023**

- Støre SJ, Tillfors M, Wästlund E, Angelhoff C, Andersson G, Norell-Clarke A. The effects of a sleep robot intervention on sleep, depression and anxiety in adults with insomnia-A randomized waitlist-controlled trial. *J Sleep Res*. 2023;32(3):e13758. doi:10.1111/jsr.13758
- ISCRTN35134834

### **Strom2004**

- Ström L, Pettersson R, Andersson G. Internet-based treatment for insomnia: a controlled evaluation. *J Consult Clin Psychol.* 2004;72(1):113-120.

### **Sunnheld2020**

- Sunnhed R, Hesser H, Andersson G, et al. Comparing internet-delivered cognitive therapy and behavior therapy with telephone support for insomnia disorder: a randomized controlled trial. *Sleep.* 2020;43(2):zsz245.
- Blanken TF, Jansson-Fröjmark M, Sunnhed R, Lancee J. Symptom-specific effects of cognitive therapy and behavior therapy for insomnia: A network intervention analysis. *J Consult Clin Psychol.* 2021;89(4):364-370.
- NCT02984670

### **Sveen2021**

- Sveen J, Jernelöv S, Pohlkamp L, Kreicbergs U, Kaldo V. Feasibility and preliminary efficacy of guided internet-delivered cognitive behavioral therapy for insomnia after the loss of a child to cancer: Randomized controlled trial. *Internet Interv.* 2021;25:100409.
- NCT02886052

### **Sweetman2019**

- Sweetman A, Lack L, Catcheside PG, et al. Cognitive and behavioral therapy for insomnia increases the use of continuous positive airway pressure therapy in obstructive sleep apnea participants with comorbid insomnia: a randomized clinical trial. *Sleep.* 2019;42(12):zsz178.
- Sweetman A, McEvoy RD, Smith S, et al. The effect of cognitive and behavioral therapy for insomnia on week-to-week changes in sleepiness and sleep parameters in patients with comorbid insomnia and sleep apnea: a randomized controlled trial. *Sleep.* 2020;43(7):zsa002.
- Sweetman A, Lack L, McEvoy RD, et al. Cognitive behavioural therapy for insomnia reduces sleep apnoea severity: a randomised controlled trial. *ERJ Open Res.* 2020;6(2):00161-2020.
- Sweetman A, Lechat B, Catcheside PG, et al. Polysomnographic Predictors of Treatment Response to Cognitive Behavioral Therapy for Insomnia in Participants With Co-morbid Insomnia and Sleep Apnea: Secondary Analysis of a Randomized Controlled Trial. *Front Psychol.* 2021;12:676763.
- Sweetman A, Lack L, McEvoy RD, et al. Effect of depression, anxiety, and stress symptoms on response to cognitive behavioral therapy for insomnia in patients with comorbid insomnia and sleep apnea: a randomized controlled trial. *J Clin Sleep Med.* 2021;17(3):545-554.
- ACTRN12613001178730

### **Talbot2014**

- Talbot LS, Maguen S, Metzler TJ, et al. Cognitive behavioral therapy for insomnia in posttraumatic stress disorder: a randomized controlled trial. *Sleep*. 2014;37(2):327-341.
- Kanady JC, Talbot LS, Maguen S, et al. Cognitive Behavioral Therapy for Insomnia Reduces Fear of Sleep in Individuals With Posttraumatic Stress Disorder. *J Clin Sleep Med*. 2018;14(7):1193-1203.
- NCT00881647

#### **Taylor2014**

- Taylor DJ, Zimmerman MR, Gardner CE, et al. A pilot randomized controlled trial of the effects of cognitive-behavioral therapy for insomnia on sleep and daytime functioning in college students. *Behav Ther*. 2014;45(3):376-389.
- Zimmerman, MR. A randomized clinical trial of Cognitive-behavioral therapy for insomnia in a college student population. 2011. *Dissertation*.

#### **Taylor2017**

- Taylor DJ, Peterson AL, Pruiksma KE, et al. Internet and In-Person Cognitive Behavioral Therapy for Insomnia in Military Personnel: A Randomized Clinical Trial. *Sleep*. 2017;40(6):10.1093/sleep/zsx075.
- Pruiksma KE, Hale WJ, Mintz J, et al. Predictors of Cognitive Behavioral Therapy for Insomnia (CBTi) Outcomes in Active-Duty U.S. Army Personnel. *Behav Ther*. 2020;51(4):522-534.

#### **Taylor2018**

- Taylor DJ, Peterson AL, Pruiksma KE, et al. Impact of cognitive behavioral therapy for insomnia disorder on sleep and comorbid symptoms in military personnel: a randomized clinical trial. *Sleep*. 2018;41(6):10.1093/sleep/zsy069.
- NCT01549899

#### **Ustinov2013**

- Ustinov, Y. Treatment of insomnia in veterans with trauma-related disorders: A brief group cognitive-behavioral intervention. 2013. *Dissertation*.

#### **VanDerZweerde2019**

- van der Zweerde T, van Straten A, Efting M, Kyle SD, Lancee J. Does online insomnia treatment reduce depressive symptoms? A randomized controlled trial in individuals with both insomnia and depressive symptoms. *Psychol Med*. 2019;49(3):501-509.
- NTR6049

#### **VanDerZweerde2020**

- Van der Zweerde T, Lancee J, Slottje P, Bosmans JE, Van Someren EJW, van Straten A. Nurse-Guided Internet-Delivered Cognitive Behavioral Therapy for Insomnia in General Practice: Results from a Pragmatic Randomized Clinical Trial. *Psychother Psychosom.* 2020;89(3):174-184.
- van der Zweerde T, Lancee J, Slottje P, et al. Cost-effectiveness of i-Sleep, a guided online CBT intervention, for patients with insomnia in general practice: protocol of a pragmatic randomized controlled trial. *BMC Psychiatry.* 2016;16:85.
- NTR 5202

#### **VanStraten2014**

- van Straten A, Emmelkamp J, de Wit J, et al. Guided Internet-delivered cognitive behavioural treatment for insomnia: a randomized trial. *Psychol Med.* 2014;44(7):1521-1532.
- NTR2132

#### **Vedaa2020**

- Vedaa Ø, Kallestad H, Scott J, et al. Effects of digital cognitive behavioural therapy for insomnia on insomnia severity: a large-scale randomised controlled trial. *Lancet Digit Health.* 2020;2(8):e397-e406.
- Kallestad H, Vedaa Ø, Scott J, et al. Overcoming insomnia: protocol for a large-scale randomised controlled trial of online cognitive behaviour therapy for insomnia compared with online patient education about sleep. *BMJ Open.* 2018;8(8):e025152.
- Vestergaard CL, Vedaa Ø, Simpson MR, et al. The effect of sleep-wake intraindividual variability in digital cognitive behavioral therapy for insomnia: a mediation analysis of a large-scale RCT. *Sleep.* 2021;44(10):zsab118.
- Kjørstad K, Sivertsen B, Vedaa Ø, et al. The effects of digital CBT-I on work productivity and activity levels and the mediational role of insomnia symptoms: Data from a randomized controlled trial with 6-month follow-up. *Behav Res Ther.* 2022;153:104083.
- NCT02558647

#### **Verma2022**

- Verma S, Quin N, Astbury L, et al. Treating postpartum insomnia: a three arm randomised controlled trial of cognitive behavioural therapy and light dark therapy [published online ahead of print, 2022 Sep 9]. *Psychol Med.* 2022;1-11.
- Verma S, Rajaratnam SMW, Davey M, Wiley JF, Bei B. Cognitive Behavioural Therapy and Light Dark Therapy for Maternal Postpartum Insomnia Symptoms: Protocol of a Parallel-Group Randomised Controlled Efficacy Trial. *Front Glob Womens Health.* 2021;1:591677.
- ACTRN12618000842268

#### **Vincent2009**



- Vincent N, Lewycky S. Logging on for better sleep: RCT of the effectiveness of online treatment for insomnia. *Sleep*. 2009;32(6):807-815.
- Vincent N, Walsh K. Hyperarousal, sleep scheduling, and time awake in bed as mediators of outcome in computerized cognitive-behavioral therapy (cCBT) for insomnia. *Behav Res Ther*. 2013;51(3):161-166.
- Vincent N, Walsh K, Lewycky S. Sleep locus of control and computerized cognitive-behavioral therapy (cCBT). *Behav Res Ther*. 2010;48(8):779-783.

### **Vitiello2013**

- Vitiello MV, McCurry SM, Shortreed SM, et al. Cognitive-behavioral treatment for comorbid insomnia and osteoarthritis pain in primary care: the lifestyles randomized controlled trial. *J Am Geriatr Soc*. 2013;61(6):947-956.
- Von Korff M, Vitiello MV, McCurry SM, et al. Group interventions for co-morbid insomnia and osteoarthritis pain in primary care: the lifestyles cluster randomized trial design. *Contemp Clin Trials*. 2012;33(4):759-768.
- Vitiello MV, McCurry SM, Shortreed SM, et al. Short-term improvement in insomnia symptoms predicts long-term improvements in sleep, pain, and fatigue in older adults with comorbid osteoarthritis and insomnia. *Pain*. 2014;155(8):1547-1554.
- Balderson BH, McCurry SM, Vitiello MV, Shortreed SM, Rybarczyk BD, Keefe FJ, Korff MV. Information without Implementation: A Practical Example for Developing a Best Practice Education Control Group. *Behav Sleep Med*. 2016 Sep-Oct;14(5):514-27.
- Koffel E, Vitiello MV, McCurry SM, Rybarczyk B, Von Korff M. Predictors of Adherence to Psychological Treatment for Insomnia and Pain: Analysis from a Randomized Trial. *Clin J Pain*. 2018;34(4):375-382.
- Koffel E, Kuhn E, Petsoulis N, et al. A randomized controlled pilot study of CBT-I Coach: Feasibility, acceptability, and potential impact of a mobile phone application for patients in cognitive behavioral therapy for insomnia. *Health Informatics J*. 2018;24(1):3-13.
- NCT01142349

### **Wagley2013**

- Wagley JN, Rybarczyk B, Nay WT, Danish S, Lund HG. Effectiveness of abbreviated CBT for insomnia in psychiatric outpatients: sleep and depression outcomes. *J Clin Psychol*. 2013;69(10):1043-1055.
- Wagley, J Nile Efficacy of a brief intervention for insomnia among psychiatric outpatients. 2010. Dissertation.

### **Wang2016**

- Wang J, Wei Q, Wu X, Zhong Z, Li G. Brief behavioral treatment for patients with treatment-resistant insomnia. *Neuropsychiatr Dis Treat*. 2016;12:1967-1975.

### **Watanabe2011**

- Watanabe N, Furukawa TA, Shimodera S, et al. Brief behavioral therapy for refractory insomnia in residual depression: an assessor-blind, randomized controlled trial. *J Clin Psychiatry*. 2011;72(12):1651-1658.
- Shimodera S, Watanabe N, Furukawa TA, et al. Change in quality of life after brief behavioral therapy for insomnia in concurrent depression: analysis of the effects of a randomized controlled trial. *J Clin Sleep Med*. 2014;10(4):433-439.
- NCT00610259

### **Watanabe2023**

- Watanabe Y, Kuroki T, Ichikawa D, Ozone M, Uchimura N, Ueno T. Effect of smartphone-based cognitive behavioral therapy app on insomnia: a randomized, double-blind study. *Sleep*. 2023;46(3):zsac270. doi:10.1093/sleep/zsac270
- jRCT2032210071

### **Wilkund2022**

- Wiklund T, Molander P, Lindner P, Andersson G, Gerdl B, Dragioti E. Internet-Delivered Cognitive Behavioral Therapy for Insomnia Comorbid With Chronic Pain: Randomized Controlled Trial. *J Med Internet Res*. 2022;24(4):e29258.
- NCT03425942

### **Woldeamanuel2021**

- Woldeamanuel YW, Blayney DW, Jo B, et al. Headache outcomes of a sleep behavioral intervention in breast cancer survivors: Secondary analysis of a randomized clinical trial. *Cancer*. 2021;127(23):4492-4503.
- NCT02165839

### **Wong2016**

- Wong MY, Ree MJ, Lee CW. Enhancing CBT for Chronic Insomnia: A Randomised Clinical Trial of Additive Components of Mindfulness or Cognitive Therapy. *Clin Psychol Psychother*. 2016;23(5):377-385.
- Lee CW, Ree MJ, Wong MY. Effective Insomnia Treatments: Investigation of Processes in Mindfulness and Cognitive Therapy. *Behaviour Change*. 2018;35(2):71-90.

### **Wong2017**

- Wong SY, Zhang DX, Li CC, et al. Comparing the Effects of Mindfulness-Based Cognitive Therapy and Sleep Psycho-Education with Exercise on Chronic Insomnia: A Randomised Controlled Trial. *Psychother Psychosom*. 2017;86(4):241-253.

### **Wong2021**

- Wong KY, Chung KF, Au CH. Low-Intensity Cognitive Behavioral Therapy for Insomnia as the Entry of the Stepped-Care Model in the Community: A Randomized Controlled Trial. *Behav Sleep Med*. 2021;19(3):378-394.
- NCT03736694

#### **Wu2006**

- Wu R, Bao J, Zhang C, Deng J, Long C. Comparison of sleep condition and sleep-related psychological activity after cognitive-behavior and pharmacological therapy for chronic insomnia. *Psychother Psychosom*. 2006;75(4):220-228.

#### **Xing2020**

- Xing J, Wu X, Liu H, et al. Effects of Electroacupuncture Therapy and Cognitive Behavioral Therapy in Chronic Insomnia: A Randomized Controlled Study. *Evid Based Complement Alternat Med*. 2020:5630130.

#### **Yamamoto2016**

- Yamamoto M, Somemura H, Nakamura S, et al. Efficacy of sleep education program based on principles of cognitive behavioral therapy to alleviate workers' distress. *Sleep and biological rhythms*. 2016;14(2):211-219.

#### **Yang2022**

- Yang YY, Jun S. The Effects of Cognitive Behavioral Therapy for Insomnia among College Students with Irritable Bowel Syndrome: A Randomized Controlled Trial. *Int J Environ Res Public Health*. 2022;19(21):14174. Published 2022 Oct 29. doi:10.3390/ijerph192114174

#### **Yang2023**

- Yang CM, Lu YL, Lee HC, et al. Can adding personalized rule-based feedback improve the therapeutic effect of self-help digital cognitive behavioral therapy for insomnia in young adults?. *Sleep Med*. 2023;107:36-45. doi:10.1016/j.sleep.2023.04.012

#### **Zachariades2012**

- Zachariades, Fotini. A CBT self-management approach for insomnia among people with chronic pain: A randomized controlled trial. 2013. Dissertation.

#### **Zachariae2018**

- Zachariae R, Amidi A, Damholdt MF, et al. Internet-Delivered Cognitive-Behavioral Therapy for Insomnia in Breast Cancer Survivors: A Randomized Controlled Trial. *J Natl Cancer Inst*. 2018;110(8):880-887.
- NCT02444026

**Zakiei2021**

- Zakiei A, Khazaie H, Rostampour M, et al. Acceptance and Commitment Therapy (ACT) Improves Sleep Quality, Experiential Avoidance, and Emotion Regulation in Individuals with Insomnia-Results from a Randomized Interventional Study. *Life (Basel)*. 2021;11(2):133.

**Zhang 2015**

- Zhang JX, Liu XH, Xie XH, et al. Mindfulness-based stress reduction for chronic insomnia in adults older than 75 years: a randomized, controlled, single-blind clinical trial. *Explore*. 2015;11(3):180-185.

**Zhang2019**

- Zhang H, Li Y, Li M, Chen X. A randomized controlled trial of mindfulness-based stress reduction for insomnia secondary to cervical cancer: Sleep effects. *Appl Nurs Res*. 2019;48:52-57.
- Zhang H, Li Y, Li M, Chen X. RETRACTED: A randomized controlled trial of mindfulness-based stress reduction for insomnia secondary to cervical cancer: Effects on sleep. *Cancer Rep (Hoboken)*. 2019;2(5):e1190.
- ChiCTR1800018571
- We rated the overall risk of bias due to the existence of the retracted paper above.

**Zhang2023**

- Zhang C, Liu Y, Guo X, Liu Y, Shen Y, Ma J. Digital Cognitive Behavioral Therapy for Insomnia Using a Smartphone Application in China: A Pilot Randomized Clinical Trial. *JAMA Netw Open*. 2023;6(3):e234866. Published 2023 Mar 1. doi:10.1001/jamanetworkopen.2023.4866
- NCT04779372

**Zhao2020**

- Zhao Y, Liu JE, Lewis FM, et al. Effects of mindfulness-based cognitive therapy on breast cancer survivors with insomnia: A randomised controlled trial. *Eur J Cancer Care (Engl)*. 2020;29(5):e13259.

**Zhou2022a**

- Zhou ES, Ritterband LM, Bethea TN, Robles YP, Heeren TC, Rosenberg L. Effect of Culturally Tailored, Internet-Delivered Cognitive Behavioral Therapy for Insomnia in Black Women: A Randomized Clinical Trial. *JAMA Psychiatry*. 2022;79(6):538-549.
- NCT03613519

**Zhou2022b**

- Zhou K, Kong J, Wan Y, Zhang X, Liu X, Qu B, Wang B, Xue R. Positive impacts of e-aid cognitive behavioural therapy on the sleep quality and mood of nurses on site during the COVID-19 pandemic. *Sleep Breath*. 2022 Jan 8:1–5.

### eMethods 3. Examination of the imputation method

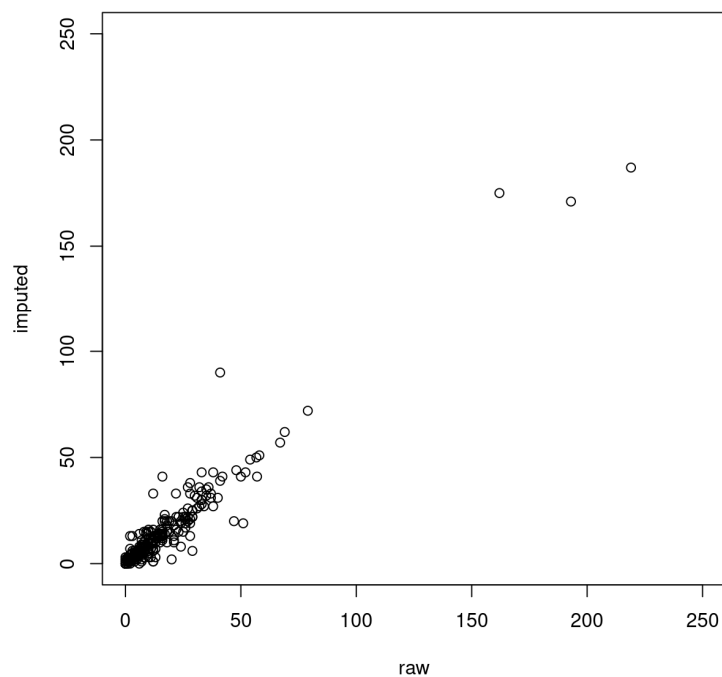

#### Single Score Intraclass Correlation

Model: twoway

Type : consistency

Subjects = 283

Raters = 2

ICC(C,1) = 0.956

F-Test, H0:  $r_0 = 0$  ; H1:  $r_0 > 0$

F(282,282) = 44.5 , p = 1.32e-152

95%-Confidence Interval for ICC Population Values:

0.945 < ICC < 0.965

## **eMethods 4. The revised Cochrane risk of bias**

### **4.1. Risk of Bias 2 interpretation**

We evaluated the risk of bias about the primary outcome, not the study quality, using the revised Cochrane risk-of-bias tool for randomized trials (RoB2). Here, we describe how we interpreted the signalling questions in each domain.

#### **Domain 1. Risk of bias arising from the randomization process**

1.1 Was the allocation sequence random?

1.2 Was the allocation sequence concealed until participants were enrolled and assigned to interventions?

We excluded studies where sequence generation was not clearly random, or where the allocation was clearly not concealed, were excluded.

1.3 Did baseline differences between intervention groups suggest a problem with the randomization process?

We evaluated if there were baseline differences in age, gender, and the primary outcome measure.

#### **Domain 2. Risk of bias due to deviations from intended interventions**

2.1. Were participants aware of their assigned intervention during the trial?

2.2. Were carers and people delivering the interventions aware of participants' assigned intervention during the trial?

In most cases, yes.

2.3. Were there deviations from the intended intervention that arose because of the trial context?

The term "trial context" refers to effects of recruitment and engagement activities on trial participants and when trial personnel undermine the implementation of the trial protocol in ways that would not happen outside the trial (e.g. daily practice). We expect non-adherence to the active treatment to occur outside the trials, too. We rated Yes only when deviations were more often in non-active arms, such as waiting list, treatment as usual or no treatment.

2.4 Were these deviations likely to have affected the outcome?

Yes.

2.5 Were these deviations from intended intervention balanced between groups?

If the proportions of deviations from intended intervention differed more than 10%, we rated No.

2.6 Was an appropriate analysis used to estimate the effect of assignment to intervention?

We used ITT or mITT in the primary analysis so we rated Yes.

#### **Domain 3. Risk of bias due to missing outcome data**

3.1 Were data for this outcome available for all, or nearly all, participants randomized?

In the guidance document of RoB2, it is stated that the proportion required for dichotomous outcomes depends on the risk of the event. As we expect the control event rate of 10-20% and the experimental event rate of 40-60%, we decided to use 10% as the threshold.

3.2 Is there evidence that the result was not biased by missing outcome data?

We rated yes when appropriate sensitivity analyses were conducted and they showed the result was not likely to be biased by missing outcome data.

3.3 Could missingness in the outcome depend on its true value?

Yes.

3.4 Is it likely that missingness in the outcome depended on its true value?

We rated yes when the proportions of missing data differed significantly (larger than 10%) between the arms or when the reasons for missing differed between the arms.

#### **Domain 4. Risk of bias in measurement of the outcome**

4.1 Was the method of measuring the outcome inappropriate?

Probably not.

4.2 Could measurement or ascertainment of the outcome have differed between intervention groups?

Probably not.

4.3 Were outcome assessors aware of the intervention received by study participants?

Yes.

4.4 Could assessment of the outcome have been influenced by knowledge of intervention received?

We rated no when more than two active comparators were used.

4.5 Is it likely that assessment of the outcome was influenced by knowledge of intervention received?

Probably not.

#### **Domain 5. Risk of bias in selection of the reported result**

5.1 Were the data that produced this result analyzed in accordance with a pre-specified analysis plan that was finalized before unblinded outcome data were available for analysis?

Is the numerical result being assessed likely to have been selected, on the basis of the results, from...

5.2. ... multiple eligible outcome measurements within the outcome domain?

5.3 ... multiple eligible analyses of the data?

We predefined in the protocol the hierarchy of outcome measures. We rated low risk of bias for the domain 5 when the trial reported the top priority outcome (ISI remission), or it reported ISI (continuous value) in a way that predefined in the statistical analysis plan. In most cases, details of statistical analysis plans were unavailable and we therefore rated some concerns.



## 4.2 The inter-rater reliability of the assessment of risk of bias

### Overall risk of bias

|      | Low | Some | High |                               |
|------|-----|------|------|-------------------------------|
| Low  | 3   | 11   | 2    | Percentage agreement<br>53.4% |
| Some | 16  | 59   | 32   | Weighed kappa<br>0.33         |
| High | 2   | 25   | 39   |                               |

### Domain 1. Risk of bias arising from the randomization process

|      | Low | Some | High |                               |
|------|-----|------|------|-------------------------------|
| Low  | 72  | 12   | 3    | Percentage agreement<br>74.1% |
| Some | 17  | 67   | 6    | Weighed kappa<br>0.55         |
| High | 1   | 10   | 1    |                               |

### Domain 2. Risk of bias due to deviations from intended interventions

|      | Low | Some | High |                               |
|------|-----|------|------|-------------------------------|
| Low  | 143 | 18   | 9    | Percentage agreement<br>77.8% |
| Some | 6   | 3    | 2    | Weighed kappa<br>0.13         |
| High | 6   | 1    | 1    |                               |

### Domain 3. Risk of bias due to missing outcome data

|      | Low | Some | High |                               |
|------|-----|------|------|-------------------------------|
| Low  | 70  | 19   | 17   | Percentage agreement<br>56.6% |
| Some | 15  | 14   | 5    | Weighed kappa<br>0.39         |
| High | 10  | 16   | 23   |                               |

### Domain 4. Risk of bias in measurement of the outcome

|      | Low | Some | High |                               |
|------|-----|------|------|-------------------------------|
| Low  | 56  | 28   | 1    | Percentage agreement<br>68.8% |
| Some | 26  | 73   | 1    | Weighed kappa<br>0.36         |
| High | 2   | 1    | 1    |                               |

### Domain 5. Risk of bias in selection of the reported result

|      | Low | Some | High |                               |
|------|-----|------|------|-------------------------------|
| Low  | 59  | 30   | 1    | Percentage agreement<br>63.0% |
| Some | 32  | 60   | 2    | Weighed kappa<br>0.31         |
| High | 1   | 4    | 0    |                               |

The overall agreement of the assessment was fair, which was not worse than the interrater reliability reported by systematic review experts.

- Minozzi S, Cinquini M, Gianola S, Gonzalez-Lorenzo M, Banzi R. The revised Cochrane risk of bias tool for randomized trials (RoB 2) showed low interrater reliability and challenges in its application. *J Clin Epidemiol.* 2020;126:37-44.

### 4.3. Risk of Bias 2 of each trial

| trial           | D1 | D2 | D3 | D4 | D5 | Overall |
|-----------------|----|----|----|----|----|---------|
| Abbasi2016      | S  | L  | L  | S  | S  | S       |
| Abdelaziz2021   | S  | L  | S  | S  | S  | H       |
| Ahorsu2020      | L  | L  | L  | S  | S  | S       |
| Alessi2016      | L  | L  | L  | L  | H  | H       |
| Alshehri2020    | L  | L  | L  | L  | S  | S       |
| Amra2022        | L  | H  | H  | S  | S  | H       |
| Arnedt2011      | S  | L  | H  | L  | L  | H       |
| Arnedt2021      | S  | L  | L  | L  | L  | S       |
| Arnedt2023      | L  | L  | L  | L  | L  | L       |
| Ashworth2015    | S  | L  | L  | S  | L  | S       |
| Ayabe2018       | L  | L  | L  | S  | L  | S       |
| Ballou2020      | L  | L  | H  | S  | S  | H       |
| Bastein2004     | S  | L  | L  | L  | S  | S       |
| Behera2023      | S  | L  | L  | L  | S  | S       |
| Bernstein2017   | S  | H  | H  | S  | S  | H       |
| Bothelius2013   | L  | L  | H  | S  | H  | H       |
| Bramoweth2020   | L  | L  | H  | L  | L  | H       |
| Broomfield2003  | S  | L  | S  | H  | S  | H       |
| Buysse2011      | S  | L  | L  | S  | S  | S       |
| Cai2022         | L  | L  | L  | S  | L  | S       |
| Cape2016        | L  | L  | S  | L  | L  | S       |
| Carney2017      | S  | L  | H  | L  | L  | H       |
| Carrera1980     | S  | L  | L  | S  | S  | S       |
| Casault2015     | L  | L  | H  | S  | L  | H       |
| Chakravorty2019 | L  | L  | L  | S  | L  | S       |
| Chan2021        | L  | L  | H  | S  | L  | H       |
| Chao2021        | L  | L  | S  | S  | L  | S       |

| trial                | D1 | D2 | D3 | D4 | D5 | Overall |
|----------------------|----|----|----|----|----|---------|
| Chapoutot2020        | L  | L  | L  | S  | S  | S       |
| Cheng2019            | L  | L  | H  | L  | L  | H       |
| Christensen2016      | L  | L  | L  | L  | L  | L       |
| Chung2023            | S  | L  | L  | S  | L  | S       |
| Craner2022           | L  | L  | H  | L  | L  | H       |
| Currie2000           | S  | L  | L  | S  | S  | S       |
| Currie2004           | S  | S  | S  | L  | S  | H       |
| Daren2012            | H  | L  | L  | L  | H  | H       |
| Dean2019             | S  | L  | L  | L  | S  | S       |
| Dekker2020           | L  | L  | L  | L  | S  | S       |
| Dirksen2008          | S  | L  | L  | S  | S  | S       |
| Drake2019            | L  | L  | L  | H  | L  | H       |
| Dyrberg2022          | L  | L  | H  | S  | L  | H       |
| Edinger2001          | S  | L  | L  | L  | S  | S       |
| Edinger2003          | S  | L  | H  | S  | S  | H       |
| Edinger2005          | S  | L  | H  | L  | S  | H       |
| Edinger2007          | L  | H  | H  | S  | S  | H       |
| Edinger2009          | S  | L  | L  | L  | L  | S       |
| ElRafahiFerreira2021 | L  | L  | H  | L  | S  | H       |
| ElRafahiFerreira2022 | L  | L  | L  | L  | L  | L       |
| Epstein2007          | S  | L  | S  | L  | S  | S       |
| Eptein2012           | S  | L  | S  | L  | L  | S       |
| Espie1989            | S  | L  | S  | L  | S  | S       |
| Espie2001            | S  | H  | H  | S  | S  | H       |
| Espie2007            | L  | L  | L  | S  | S  | S       |
| Espie2008            | L  | L  | S  | S  | S  | S       |
| Espie2012            | L  | L  | L  | L  | S  | S       |
| Espie2019            | L  | L  | L  | S  | L  | S       |
| Falloon2015          | L  | L  | L  | S  | S  | S       |
| Farsani2021          | L  | L  | L  | S  | S  | S       |
| Felder2020           | L  | L  | S  | S  | L  | S       |
| Fernando2013         | L  | L  | L  | L  | S  | S       |
| Feuerstein2017       | S  | L  | S  | L  | L  | S       |
| Ford2022             | L  | L  | L  | S  | L  | S       |
| Fowler2009           | L  | L  | L  | S  | S  | S       |
| Freeman2015          | L  | L  | L  | S  | L  | S       |
| Freeman2017          | L  | L  | L  | S  | L  | S       |

| trial                | D1 | D2 | D3 | D4 | D5 | Overall |
|----------------------|----|----|----|----|----|---------|
| Fucito2014           | H  | L  | S  | L  | S  | H       |
| Garcia2018           | L  | S  | S  | S  | L  | S       |
| Garland2014          | L  | L  | L  | L  | L  | L       |
| Gebara2019           | S  | L  | L  | S  | S  | S       |
| Gehrman2020          | L  | L  | L  | L  | S  | S       |
| Gehrman2021          | L  | L  | L  | L  | S  | S       |
| Germain2014          | S  | L  | S  | S  | L  | S       |
| Gieselmann2019       | S  | L  | S  | L  | S  | S       |
| Glozier2019          | L  | L  | L  | L  | L  | L       |
| Greeff1998           | S  | L  | L  | S  | S  | S       |
| Guarnaccia2023       | S  | L  | S  | S  | S  | H       |
| Hagatun2019          | S  | L  | L  | L  | L  | S       |
| Hall2022             | S  | L  | L  | L  | S  | S       |
| Ham2020              | S  | L  | H  | S  | S  | H       |
| Harris2012           | S  | L  | L  | L  | S  | S       |
| Harris2019           | S  | L  | L  | L  | S  | S       |
| Harvey2014           | L  | L  | L  | L  | L  | L       |
| Harvey2015           | L  | L  | S  | L  | L  | S       |
| Ho2014               | L  | L  | S  | S  | S  | S       |
| Ho2021               | L  | L  | S  | S  | L  | S       |
| Holmqvist2014        | S  | L  | L  | L  | S  | S       |
| Horsch2017           | L  | L  | H  | S  | L  | H       |
| Hou2014              | S  | H  | L  | S  | S  | H       |
| Jacobs1993           | S  | L  | L  | L  | S  | S       |
| Jacobs2004           | S  | L  | H  | L  | S  | H       |
| JanssonFrojmark2012a | L  | L  | L  | L  | L  | L       |
| JanssonFrojmark2012b | L  | L  | L  | S  | L  | S       |
| Jarnefelt2020        | L  | L  | H  | L  | S  | H       |
| Javaheri2020         | S  | L  | S  | S  | S  | H       |
| Jernelov2012         | S  | L  | L  | S  | L  | S       |
| Johann2020           | S  | L  | L  | S  | S  | S       |
| Jungquist2010        | S  | L  | L  | L  | S  | S       |
| Kaku2012             | S  | H  | L  | L  | S  | H       |
| Kaldo2015            | S  | L  | L  | L  | L  | S       |
| Kaldo2020            | S  | L  | H  | S  | L  | H       |
| Kallestad2021        | S  | L  | L  | L  | L  | S       |
| Kalmbach2020         | S  | L  | L  | L  | L  | S       |

| trial           | D1 | D2 | D3 | D4 | D5 | Overall |
|-----------------|----|----|----|----|----|---------|
| Kapella2011     | S  | L  | L  | L  | S  | S       |
| Kapella2022     | S  | L  | L  | L  | L  | S       |
| Kennet2021      | S  | L  | H  | S  | L  | H       |
| Krieger2019     | L  | L  | H  | S  | L  | H       |
| Kuhn2022        | L  | L  | L  | S  | S  | S       |
| Kyle2020        | L  | L  | H  | S  | L  | H       |
| Lami2018        | S  | L  | S  | L  | S  | S       |
| Lancee2012      | S  | L  | H  | S  | S  | H       |
| Lancee2013      | S  | L  | S  | L  | L  | S       |
| Lancee2015      | S  | L  | L  | S  | L  | S       |
| Lancee2016      | S  | L  | L  | S  | L  | S       |
| Lappalainen2019 | S  | S  | H  | S  | S  | H       |
| Latocha2022     | L  | H  | L  | L  | L  | H       |
| Leerssen2022    | L  | L  | L  | L  | S  | S       |
| Lichstein2000   | S  | H  | H  | S  | S  | H       |
| Lichstein2001   | S  | L  | H  | L  | S  | H       |
| Liu2022         | L  | L  | S  | S  | S  | S       |
| Lopez2019       | S  | L  | H  | L  | S  | H       |
| Lorenz2019      | S  | L  | L  | S  | L  | S       |
| Lovato2014      | S  | L  | L  | S  | L  | S       |
| Low2020         | S  | L  | L  | L  | S  | S       |
| Maguen2021      | L  | L  | L  | L  | L  | L       |
| Majd2020        | S  | L  | L  | L  | L  | S       |
| Manber2008      | L  | L  | L  | L  | L  | L       |
| Manber2016      | L  | L  | H  | L  | L  | H       |
| Manber2019      | L  | L  | L  | L  | L  | L       |
| Mao2018         | S  | L  | L  | L  | S  | S       |
| Marino2001      | S  | S  | H  | S  | L  | H       |
| Marks2023       | L  | L  | L  | L  | L  | L       |
| Martinez2014    | L  | L  | S  | S  | S  | S       |
| Matthews2014    | L  | L  | S  | L  | L  | S       |
| McCrae2007      | S  | L  | L  | S  | S  | S       |
| McCrae2019      | L  | L  | S  | S  | S  | S       |
| McCrae2020      | L  | L  | H  | S  | S  | H       |
| McCurry2016     | S  | L  | H  | L  | L  | H       |
| McCurry2021     | L  | L  | S  | L  | L  | S       |
| Means2000       | S  | L  | L  | S  | S  | S       |

| trial            | D1 | D2 | D3 | D4 | D5 | Overall |
|------------------|----|----|----|----|----|---------|
| Milby1993        | S  | L  | L  | L  | S  | S       |
| Miller2021       | S  | L  | H  | L  | L  | H       |
| Miller2023       | L  | L  | L  | L  | L  | L       |
| Mimeault1999     | S  | L  | H  | S  | L  | H       |
| Miro2011         | S  | L  | S  | S  | S  | H       |
| Morawetz1989     | S  | S  | H  | S  | S  | H       |
| Morgan2012       | H  | L  | H  | S  | L  | H       |
| Morin1988        | S  | L  | L  | S  | S  | S       |
| Morin1993        | S  | L  | L  | S  | S  | S       |
| Morin1999        | S  | L  | H  | S  | L  | H       |
| NCT00127790-1    | S  | L  | L  | S  | L  | S       |
| NCT01011218-2    | S  | S  | S  | L  | L  | S       |
| NCT01987089      | L  | L  | L  | L  | L  | L       |
| NCT02613364      | S  | L  | S  | L  | L  | S       |
| NCT03964974      | S  | S  | H  | L  | L  | H       |
| NorellClarke2015 | L  | L  | H  | L  | L  | H       |
| Okajima2020      | L  | L  | H  | S  | L  | H       |
| Okajima2021      | S  | L  | S  | S  | L  | S       |
| Ong2018          | L  | L  | H  | S  | L  | H       |
| Ong2020          | L  | L  | S  | S  | L  | S       |
| Oswald2022       | L  | L  | L  | S  | L  | S       |
| Padron2022       | S  | L  | H  | S  | S  | H       |
| Palesh2018       | S  | L  | H  | S  | L  | H       |
| Palesh2020       | S  | L  | L  | L  | L  | S       |
| Patel2017        | L  | L  | H  | S  | L  | H       |
| Perlis2004       | S  | L  | H  | L  | S  | H       |
| Perrault2022     | S  | L  | H  | S  | L  | H       |
| Pigeon2017       | S  | L  | S  | S  | L  | S       |
| Pigeon2019       | S  | L  | S  | S  | L  | S       |
| Pigeon2022       | L  | L  | H  | S  | L  | H       |
| Pillai2015       | S  | L  | H  | S  | L  | H       |
| Prados2020       | S  | L  | S  | S  | S  | H       |
| Quintiliani2020  | S  | L  | L  | S  | L  | S       |
| Redeker2015      | S  | L  | S  | L  | L  | S       |
| Redeker2022      | L  | L  | L  | L  | L  | L       |
| Ritterband2009   | S  | L  | L  | S  | L  | S       |
| Ritterband2012   | S  | L  | L  | S  | S  | S       |

| trial             | D1 | D2 | D3 | D4 | D5 | Overall |
|-------------------|----|----|----|----|----|---------|
| Ritterband2017    | L  | L  | L  | L  | L  | L       |
| Robabeh2015       | S  | L  | L  | L  | S  | S       |
| Roscoe2015        | L  | L  | H  | L  | S  | H       |
| Rosen2000         | S  | L  | H  | S  | S  | H       |
| Rybarczyk2005     | L  | L  | L  | L  | S  | S       |
| Sadler2018        | L  | L  | L  | L  | L  | L       |
| Sandlund2017      | L  | L  | S  | S  | S  | S       |
| Sato2019          | S  | L  | L  | S  | S  | S       |
| Sato2022          | S  | L  | H  | S  | S  | H       |
| Savard2005        | S  | L  | H  | S  | L  | H       |
| Savard2014        | L  | L  | H  | S  | S  | H       |
| Schuffelen2023    | L  | L  | L  | S  | L  | S       |
| Sgoifo2017        | L  | L  | L  | S  | S  | S       |
| Sheaves2018       | L  | L  | L  | L  | L  | L       |
| Shimamoto2022     | L  | L  | L  | S  | S  | S       |
| Shin2023          | L  | L  | H  | L  | L  | H       |
| Short2021         | S  | L  | S  | S  | S  | H       |
| Siebmnnns2021     | L  | L  | L  | S  | S  | S       |
| Siengsukon2020    | S  | L  | L  | L  | S  | S       |
| Siengsukon2021    | S  | L  | L  | L  | S  | S       |
| Simeit2004        | S  | L  | L  | L  | H  | H       |
| Smith2015         | S  | L  | L  | L  | S  | S       |
| Smitherman2016    | L  | L  | S  | L  | S  | S       |
| Soeffing2008      | S  | S  | L  | L  | H  | H       |
| Song2020          | S  | H  | H  | L  | S  | H       |
| Speed2022         | L  | L  | H  | L  | L  | H       |
| Store2022         | L  | L  | L  | S  | L  | S       |
| Strom2004         | S  | L  | H  | S  | S  | H       |
| Sunnheld2020      | S  | L  | L  | L  | L  | S       |
| Sveen2021         | L  | L  | S  | L  | L  | S       |
| Sweetman2019      | S  | L  | L  | S  | H  | H       |
| Talbot2014        | L  | L  | L  | S  | L  | S       |
| Taylor2014        | L  | L  | S  | S  | L  | S       |
| Taylor2017        | S  | L  | L  | L  | S  | S       |
| Taylor2018        | S  | L  | L  | S  | S  | S       |
| Ustinov2013       | S  | L  | H  | S  | H  | H       |
| VanDerZweerde2019 | L  | L  | S  | S  | S  | S       |

| trial             | D1 | D2 | D3 | D4 | D5 | Overall |
|-------------------|----|----|----|----|----|---------|
| VanDerZweerde2020 | L  | L  | S  | S  | L  | S       |
| VanStraten2014    | L  | L  | L  | S  | S  | S       |
| Vedaa2020         | L  | L  | S  | L  | L  | S       |
| Verma2022         | L  | L  | L  | S  | L  | S       |
| Vincent2009       | S  | L  | L  | S  | S  | S       |
| Vitiello2013      | S  | L  | L  | L  | L  | S       |
| Wagley2013        | S  | L  | L  | S  | S  | S       |
| Wang2016          | L  | L  | L  | L  | S  | S       |
| Watanabe2011      | L  | L  | L  | S  | L  | S       |
| Watanabe2023      | L  | L  | L  | L  | L  | L       |
| Wilkund2022       | L  | L  | S  | L  | S  | S       |
| Woldeamanuel2021  | L  | L  | L  | L  | L  | L       |
| Wong2016          | S  | L  | L  | L  | S  | S       |
| Wong2017          | L  | L  | L  | L  | L  | L       |
| Wong2021          | L  | L  | H  | L  | L  | H       |
| Wu2006            | S  | L  | S  | L  | S  | S       |
| Xing2020          | L  | L  | L  | L  | L  | L       |
| Yamamoto2016      | S  | L  | S  | S  | S  | H       |
| Yang2022          | S  | L  | L  | S  | S  | S       |
| Yang2023          | S  | L  | H  | S  | S  | H       |
| Zachariades2012   | S  | L  | H  | S  | S  | H       |
| Zachariae2018     | L  | L  | L  | S  | L  | S       |
| Zakiei2021        | S  | L  | S  | L  | S  | S       |
| Zhang2015         | S  | L  | L  | S  | S  | S       |
| Zhang2019         | S  | L  | L  | S  | S  | H       |
| Zhang2023         | S  | L  | L  | L  | S  | S       |
| Zhao2020          | L  | L  | L  | S  | L  | S       |
| Zhou2022a         | S  | L  | L  | L  | L  | S       |
| Zhou2022b         | S  | L  | S  | S  | S  | H       |

D1 = Risk of bias arising from the randomization process; D2 = Risk of bias due to deviations from intended interventions; D3 = Risk of bias due to missing outcome data; D4 = Risk of bias in measurement of the outcome; D5 = Risk of bias in selection of the reported result; H = high risk; L = low risk; S = some concern.

The overall risk of bias of the primary outcome for a study was judged “low” only when the study was judged to be at low risk of bias for ALL the five domains of potential biases arising from the randomization process, due to deviations from intended interventions, due to missing



outcome data, in measurement of the outcome or selection of reported results, “some concerns” when one to three domains were judged to have some concerns and none at high risk, and “high” when the study was judged to be at high risk in one or more domains or to have some concerns in four or more domains

## eMethods 5. Assessment of inconsistency for the primary outcome

Statistical heterogeneity of the treatment-level NMA was estimated to be  $\tau^2=0.23$ . The global, design-by-treatment test for inconsistency gave  $Q=38.08$ , with 32 degrees of freedom,  $p\text{-value}=0.21$ . The local approach to inconsistency (back-calculation method) gave the following results:

> # local

> netsplit(net\_nma) # here you can check which (and how many) loops show inconsistencies between direct and indirect TEs.

Separate indirect from direct evidence (SIDE) using back-calculation method

Random effects model:

| comparison | k  | prop | nma direct | indir. | RoR     | z      | p-value      |
|------------|----|------|------------|--------|---------|--------|--------------|
| BT:CBT     | 7  | 0.20 | 0.6593     | 0.5670 | 0.6840  | 0.8290 | -0.58 0.5597 |
| BT:CT      | 2  | 0.31 | 1.0018     | 1.3145 | 0.8848  | 1.4855 | 0.77 0.4408  |
| BT:NT      | 0  | 0    | 2.4198     | .      | 2.4198  | .      | .            |
| BT:PE      | 25 | 0.45 | 2.4972     | 3.4942 | 1.8979  | 1.8411 | 2.29 0.0219  |
| BT:PLB     | 0  | 0    | 3.7586     | .      | 3.7586  | .      | .            |
| BT:RT      | 4  | 0.31 | 1.9548     | 2.5841 | 1.7273  | 1.4961 | 0.84 0.3997  |
| BT:TAU     | 2  | 0.29 | 1.7778     | 1.5835 | 1.8640  | 0.8495 | -0.28 0.7803 |
| BT:WL      | 22 | 0.51 | 3.7827     | 3.0080 | 4.7980  | 0.6269 | -1.76 0.0790 |
| CBT:CT     | 6  | 0.37 | 1.5195     | 2.3620 | 1.1736  | 2.0126 | 1.51 0.1319  |
| CBT:NT     | 3  | 0.90 | 3.6704     | 3.1675 | 14.0191 | 0.2259 | -1.16 0.2443 |
| CBT:PE     | 76 | 0.86 | 3.7879     | 3.5367 | 5.8504  | 0.6045 | -2.05 0.0399 |
| CBT:PLB    | 3  | 0.58 | 5.7012     | 6.3044 | 4.9581  | 1.2715 | 0.28 0.7776  |
| CBT:RT     | 5  | 0.40 | 2.9651     | 3.7418 | 2.5379  | 1.4744 | 0.91 0.3616  |
| CBT:TAU    | 6  | 0.74 | 2.6966     | 2.9621 | 2.0562  | 1.4406 | 0.64 0.5238  |
| CBT:WL     | 67 | 0.79 | 5.7377     | 6.0149 | 4.8019  | 1.2526 | 0.92 0.3580  |
| CT:NT      | 1  | 0.13 | 2.4155     | 8.8000 | 1.9883  | 4.4259 | 1.16 0.2443  |
| CT:PE      | 3  | 0.17 | 2.4928     | 3.5629 | 2.3186  | 1.5367 | 0.70 0.4862  |
| CT:PLB     | 2  | 0.49 | 3.7519     | 3.3223 | 4.2244  | 0.7865 | -0.28 0.7776 |
| CT:RT      | 1  | 0.09 | 1.9513     | 1.2000 | 2.0492  | 0.5856 | -0.53 0.5968 |
| CT:TAU     | 0  | 0    | 1.7746     | .      | 1.7746  | .      | .            |
| CT:WL      | 5  | 0.25 | 3.7759     | 8.3082 | 2.8877  | 2.8771 | 1.98 0.0480  |
| NT:PE      | 0  | 0    | 1.0320     | .      | 1.0320  | .      | .            |
| NT:PLB     | 0  | 0    | 1.5533     | .      | 1.5533  | .      | .            |
| NT:RT      | 0  | 0    | 0.8078     | .      | 0.8078  | .      | .            |

|         |   |      |        |        |        |        |       |        |
|---------|---|------|--------|--------|--------|--------|-------|--------|
| NT:TAU  | 0 | 0    | 0.7347 | .      | 0.7347 | .      | .     | .      |
| NT:WL   | 0 | 0    | 1.5632 | .      | 1.5632 | .      | .     | .      |
| PLB:PE  | 0 | 0    | 0.6644 | .      | 0.6644 | .      | .     | .      |
| RT:PE   | 5 | 0.26 | 1.2775 | 1.9158 | 1.1083 | 1.7286 | 1.12  | 0.2633 |
| TAU:PE  | 1 | 0.05 | 1.4047 | 4.5000 | 1.3133 | 3.4264 | 1.07  | 0.2824 |
| WL:PE   | 3 | 0.03 | 0.6602 | 0.2327 | 0.6802 | 0.3422 | -1.43 | 0.1522 |
| PLB:RT  | 0 | 0    | 0.5201 | .      | 0.5201 | .      | .     | .      |
| PLB:TAU | 0 | 0    | 0.4730 | .      | 0.4730 | .      | .     | .      |
| PLB:WL  | 0 | 0    | 1.0064 | .      | 1.0064 | .      | .     | .      |
| RT:TAU  | 0 | 0    | 0.9095 | .      | 0.9095 | .      | .     | .      |
| RT:WL   | 5 | 0.21 | 1.9351 | 2.2117 | 1.8674 | 1.1844 | 0.32  | 0.7511 |
| TAU:WL  | 0 | 0    | 2.1278 | .      | 2.1278 | .      | .     | .      |

Legend:

comparison - Treatment comparison

k - Number of studies providing direct evidence

prop - Direct evidence proportion

nma - Estimated treatment effect (OR) in network meta-analysis

direct - Estimated treatment effect (OR) derived from direct evidence

indir. - Estimated treatment effect (OR) derived from indirect evidence

RoR - Ratio of Ratios (direct versus indirect)

z - z-value of test for disagreement (direct versus indirect)

p-value - p-value of test for disagreement (direct versus indirect)

**eTable 1. Components and delivery formats that are included in CBT**

|                        |                               | CBT       |
|------------------------|-------------------------------|-----------|
|                        |                               | n=210     |
|                        |                               | n (%)     |
|                        | Components                    |           |
| Educational components | Sleep hygiene education       | 198 (94)  |
|                        | Sleep diary                   | 192 (91)  |
| Cognitive components   | Cognitive restructuring       | 199 (95)  |
|                        | Third wave components         | 44 (21)   |
|                        | Constructive worry            | 21 (10)   |
| Behavioral components  | Sleep restriction             | 198 (94)  |
|                        | Stimulus control              | 194 (92)  |
|                        | Paradoxical intention         | 18 (9)    |
|                        | Relaxation                    | 139 (66)  |
| Others                 | Non-specific treatment effect | 210 (100) |
|                        | Waiting component             | 3 (1)     |
| Delivery methods       | Individual                    | 91 (43)   |
|                        | Group                         | 54 (26)   |
|                        | Face-to-face                  | 121 (58)  |
|                        | Online therapeutic guidance   | 31 (15)   |
|                        | Human encouragement           | 36 (17)   |
|                        | Automatic encouragement       | 30 (14)   |

## eTable 2. Characteristics of included trials

We found 206 two-arm trials; 26 three-arm trials; 7 four-arm trials; 1 five-arm trial; and 1 six-arm trial. We divided 5 four-arm trials into 2 two-armed trials each in the analysis so that concomitant treatments were equally distributed among arms. We divided a five-arm trial into two trials in the analysis because it reported different outcome measures for subgroups.

| trial         | Arm          | treatment | Year | Country      | Age_m | Age_sd | Age_n | F_n | Insomnia diagnosis | Comorbidities               | n   | r  |
|---------------|--------------|-----------|------|--------------|-------|--------|-------|-----|--------------------|-----------------------------|-----|----|
| Abbasi2016    | Intervention | CBT       | 2016 | Iran         | 35.3  | 5.3    | 36    | 36  | 2. informal_PSQI   | 3. phy_others               | 36  | 2  |
| Abbasi2016    | Control      | WL        | 2016 | Iran         | 33.2  | 8.9    | 36    | 36  | 2. informal_PSQI   | 3. phy_others               | 36  | 0  |
| Abdelaziz2021 | Study        | CBT       | 2021 | Saudi Arabia | 53.9  | 4.1    | 40    | 40  | 2. informal_ISI    | 3. phy_menopause            | 49  | 16 |
| Abdelaziz2021 | Control      | PE        | 2021 | Saudi Arabia | 52.2  | 4.3    | 40    | 40  | 2. informal_ISI    | 3. phy_menopause            | 49  | 6  |
| Ahorsu2020    | CBT-I        | CBT       | 2020 | Iran         | 38.4  | 13.5   | 160   | 97  | 2. informal_ISI    | 3. phy_others               | 160 | 9  |
| Ahorsu2020    | PE           | WL        | 2020 | Iran         | 38.0  | 9.9    | 160   | 90  | 2. informal_ISI    | 3. phy_others               | 160 | 2  |
| Alessi2016    | Individual   | CBT       | 2016 | USA          | 72.1  | 7.9    | 54    | 2   | 1. formal_ICSD     | 4. psy_phy_mixed            | 54  | 33 |
| Alessi2016    | Group        | CBT       | 2016 | USA          | 72.1  | 7.9    | 52    | 2   | 1. formal_ICSD     | 4. psy_phy_mixed            | 52  | 32 |
| Alessi2016    | Control      | PE        | 2016 | USA          | 72.4  | 7.3    | 53    | 1   | 1. formal_ICSD     | 4. psy_phy_mixed            | 53  | 21 |
| Alshehri2020  | CBT-I        | CBT       | 2020 | USA          | 61.9  | 6.5    | 14    | 10  | 2. informal_ISI    | 3. phy_diabetes             | 14  | 8  |
| Alshehri2020  | HE           | PE        | 2020 | USA          | 59.4  | 9.5    | 14    | 7   | 2. informal_ISI    | 3. phy_diabetes             | 14  | 2  |
| Amra2022      | Intervention | CBT       | 2022 | Iran         | 34.6  | 9.5    | 31    | 25  | 2. informal_ISI    | 4. psy_phy_mixed            | 32  | 18 |
| Amra2022      | Control      | NT        | 2022 | Iran         | 36.6  | 6.9    | 26    | 17  | 2. informal_ISI    | 4. psy_phy_mixed            | 32  | 4  |
| Arnedt2011    | CBTI-AD      | CBT       | 2011 | USA          | 46.2  | 8.9    | 9     | 3   | 2. informal_ISI    | 2. psy_substance_dependence | 9   | 5  |
| Arnedt2011    | BPT          | PE        | 2011 | USA          | 46.1  | 12.0   | 8     | 3   | 2. informal_ISI    | 2. psy_substance_dependence | 8   | 2  |
| Arnedt2021    | CBT-TM       | CBT       | 2021 | USA          | 43.7  | 17.4   | 33    | 23  | 1. formal_ICSD     | 4. psy_phy_mixed            | 33  | 14 |

| trial         | Arm          | treatment | Year | Country   | Age_m | Age_sd | Age_n | F_n | Insomnia diagnosis    | Comorbidities               | n  | r  |
|---------------|--------------|-----------|------|-----------|-------|--------|-------|-----|-----------------------|-----------------------------|----|----|
| Amedt2021     | CBT-F2F      | CBT       | 2021 | USA       | 50.9  | 14.5   | 32    | 23  | 1. formal_ICSD        | 4. psy_phy_mixed            | 32 | 16 |
| Amedt2023     | CBT-CB-TM    | CBT       | 2023 | USA       | 36.7  | 12.0   | 30    | 23  | 2. informal_ISI       | 2. psy_substance_dependence | 30 | 13 |
| Amedt2023     | SHE-TM       | PE        | 2023 | USA       | 38.7  | 13.7   | 27    | 20  | 2. informal_ISI       | 2. psy_substance_dependence | 27 | 4  |
| Ashworth2015  | CBT-I        | CBT       | 2015 | Australia | 37.1  | 12.8   | 21    | 13  | 1. formal_DSM         | 2. psy_MDD                  | 21 | 12 |
| Ashworth2015  | Self-help    | CBT       | 2015 | Australia | 36.4  | 13.8   | 20    | 12  | 1. formal_DSM         | 2. psy_MDD                  | 21 | 2  |
| Ayabe2018     | CBT-I + TAU  | BT        | 2018 | Japan     | 61.2  | 13.8   | 24    | 14  | 1. formal_DSM         | 0. primary_insomnia         | 24 | 6  |
| Ayabe2018     | TAU          | WL        | 2018 | Japan     | 58.5  | 16.6   | 27    | 16  | 1. formal_DSM         | 0. primary_insomnia         | 27 | 2  |
| Ballou2020    | BBT          | BT        | 2020 | USA       | 49.0  | 18.0   | 10    | 9   | 2. informal_ISI       | 3. phy_others               | 13 | 4  |
| Ballou2020    | Control      | WL        | 2020 | USA       | 49.0  | 18.0   | 12    | 10  | 2. informal_ISI       | 3. phy_others               | 12 | 0  |
| Bastein2004   | Group        | CBT       | 2004 | Canada    | 40.0  | 10.4   | 16    | 11  | 3. others             | 0. primary_insomnia         | 16 | 10 |
| Bastein2004   | Telephone    | CBT       | 2004 | Canada    | 41.6  | 9.5    | 14    | 7   | 3. others             | 0. primary_insomnia         | 14 | 4  |
| Bastein2004   | Individual   | CBT       | 2004 | Canada    | 43.8  | 10.0   | 15    | 11  | 3. others             | 0. primary_insomnia         | 15 | 7  |
| Behera2023    | HMBCT        | CBT       | 2023 | India     | 25    | 4.68   | 26    | 0   | 1. formal_Edinger2004 | 1. primary_secondary_mixed  | 26 | 16 |
| Behera2023    | Control      | BT        | 2023 | India     | 24    | 3.01   | 22    | 0   | 1. formal_Edinger2004 | 1. primary_secondary_mixed  | 22 | 0  |
| Bernstein2017 | Intervention | CBT       | 2017 | USA       | 54.9  | 13.0   | 43    | 38  | 1. formal_DSM         | 0. primary_insomnia         | 43 | 15 |
| Bernstein2017 | Control      | WL        | 2017 | USA       | 53.6  | 12.3   | 45    | 36  | 1. formal_DSM         | 0. primary_insomnia         | 45 | 2  |
| Bothelius2013 | CBTI         | CBT       | 2013 | Sweden    | 48.1  | 13.2   | 40    | 33  | 1. formal_Edinger2004 | 1. primary_secondary_mixed  | 40 | 12 |

| trial          | Arm              | treatment | Year | Country     | Age_m | Age_sd | Age_n | F_n | Insomnia diagnosis    | Comorbidities              | n   | r  |
|----------------|------------------|-----------|------|-------------|-------|--------|-------|-----|-----------------------|----------------------------|-----|----|
| Bothelius2013  | WL               | WL        | 2013 | Sweden      | 53.0  | 9.4    | 38    | 30  | 1. formal_Edinger2004 | 1. primary_secondary_mixed | 38  | 2  |
| Bramoweth2020  | BBTI             | BT        | 2020 | USA         | 56.8  | 13.7   | 31    | 2   | 1. formal_DSM         | 1. primary_secondary_mixed | 31  | 7  |
| Bramoweth2020  | CBTI             | CBT       | 2020 | USA         | 53.4  | 15.2   | 32    | 4   | 1. formal_DSM         | 1. primary_secondary_mixed | 32  | 4  |
| Broomfield2003 | PI               | BT        | 2003 | UK          | 26.0  | *      | 17    | 9   | 1. formal_ICSD        | 0. primary_insomnia        | 17  | 6  |
| Broomfield2003 | C                | PE        | 2003 | UK          | 24.4  | *      | 17    | 10  | 1. formal_ICSD        | 0. primary_insomnia        | 17  | 3  |
| Buysse2011     | BBTI             | BT        | 2011 | USA         | 72.5  | 6.6    | 39    | 26  | 1. formal_DSM         | 0. primary_insomnia        | 42  | 35 |
| Buysse2011     | IC               | WL        | 2011 | USA         | 70.8  | 7.8    | 40    | 28  | 1. formal_DSM         | 0. primary_insomnia        | 40  | 35 |
| Cai2022        | Mindfulness      | CT        | 2022 | China       | 80    | 8.0    | 38    | 25  | 2. informal_PSQI      | 2. psy_others              | 38  | 33 |
| Cai2022        | Health education | WL        | 2022 | China       | 80    | 10.8   | 37    | 31  | 2. informal_PSQI      | 2. psy_others              | 37  | 19 |
| Cape2016       | CBT-I            | CBT       | 2016 | UK          | 42.2  | 14.9   | 119   | 64  | 3. others             | 2. psy_mixed               | 119 | 48 |
| Cape2016       | TAU              | PE        | 2016 | UK          | 42.2  | 13.5   | 120   | 79  | 3. others             | 2. psy_mixed               | 120 | 35 |
| Carney2017     | CBT+AD           | CBT       | 2017 | Canada, USA | 45.0  | 9.4    | 36    | 20  | 1. formal_Edinger2004 | 2. psy_MDD                 | 36  | 8  |
| Carney2017     | AD+SH            | PE        | 2017 | Canada, USA | 40.1  | 11.4   | 35    | 22  | 1. formal_Edinger2004 | 2. psy_MDD                 | 35  | 2  |
| Carrera1980    | Ocean tape       | RT        | 1980 | USA         | *     | *      | *     | 5   | 3. others             | 0. primary_insomnia        | 16  | 5  |
| Carrera1980    | Wait-control     | WL        | 1980 | USA         | *     | *      | *     | 12  | 3. others             | 0. primary_insomnia        | 23  | 4  |
| Casault2015    | mCBT-I           | CBT       | 2015 | Canada      | 56.9  | 10.8   | 20    | 19  | 2. informal_ISI       | 3. phy_cancer              | 20  | 14 |
| Casault2015    | CTL              | WL        | 2015 | Canada      | 57.0  | 9.4    | 18    | 16  | 2. informal_ISI       | 3. phy_cancer              | 18  | 4  |

| trial           | Arm             | treatment | Year | Country   | Age_m | Age_sd | Age_n | F_n | Insomnia diagnosis | Comorbidities                  | n   | r   |
|-----------------|-----------------|-----------|------|-----------|-------|--------|-------|-----|--------------------|--------------------------------|-----|-----|
| Chakravorty2019 | CBT-I           | CBT       | 2019 | USA       | 52.0  | 7.0    | 11    | 0   | 2. informal_ISI    | 2.<br>psy_substance_dependence | 11  | 7   |
| Chakravorty2019 | MO              | PE        | 2019 | USA       | 56.0  | 6.0    | 11    | 0   | 2. informal_ISI    | 2.<br>psy_substance_dependence | 11  | 2   |
| Chan2021        | Tx              | CBT       | 2021 | Hong Kong | 27.3  | 7.3    | 167   | 109 | 1. formal_ICD      | 2. psy_MDD                     | 167 | 25  |
| Chan2021        | WL              | WL        | 2021 | Hong Kong | 27.3  | 7.2    | 153   | 124 | 1. formal_ICD      | 2. psy_MDD                     | 153 | 6   |
| Chao2021        | CBT-I           | CBT       | 2021 | USA       | 55.0  | 7.0    | 39    | 11  | 1. formal_DSM      | 2. psy_others                  | 39  | 12  |
| Chao2021        | Waitlist        | WL        | 2021 | USA       | 54.0  | 6.0    | 46    | 10  | 1. formal_DSM      | 2. psy_others                  | 46  | 1   |
| Chapoutot2020   | ACT-E-CBT       | CBT       | 2020 | France    | 48.0  | 10.0   | 15    | 12  | 1. formal_ICSD     | 2.<br>psy_substance_dependence | 16  | 4   |
| Chapoutot2020   | WLC             | WL        | 2020 | France    | 48.0  | 10.0   | 15    | 12  | 1. formal_ICSD     | 2.<br>psy_substance_dependence | 16  | 0   |
| Cheng2019       | dCBT-I          | CBT       | 2019 | USA       | 44.5  | 15.8   | 358   | 279 | 1. formal_DSM      | 1.<br>primary_secondary_mixed  | 946 | 193 |
| Cheng2019       | Sleep education | PE        | 2019 | USA       | 45.7  | 15.1   | 300   | 240 | 1. formal_DSM      | 1.<br>primary_secondary_mixed  | 439 | 42  |
| Christensen2016 | SHUTi           | CBT       | 2016 | Australia | 43.0  | 12.2   | 574   | 422 | 3. others          | 0. primary_insomnia            | 574 | 293 |
| Christensen2016 | HealthWatch     | PE        | 2016 | Australia | 42.5  | 12.2   | 575   | 423 | 3. others          | 0. primary_insomnia            | 575 | 123 |



| trial      | Arm                | treatment | Year | Country     | Age_m | Age_sd | Age_n | F_n | Insomnia diagnosis | Comorbidities               | n   | r  |
|------------|--------------------|-----------|------|-------------|-------|--------|-------|-----|--------------------|-----------------------------|-----|----|
| Chung2023  | mindfulness        | CT        | 2023 | Hong Kong   | 47.95 | 11.63  | 102   | 78  | 1. formal_DSM      | 2. psy_others               | 102 | 9  |
| Chung2023  | Health education   | WL        | 2023 | Hong Kong   | 45.63 | 11.75  | 98    | 66  | 1. formal_DSM      | 2. psy_others               | 98  | 9  |
| Craner2022 | IPRP-UC            | CBT       | 2022 | USA         | 48.8  | 16.7   | 24    | 20  | 2. informal_ISI    | 3. phy_others               | 24  | 7  |
| Craner2022 | IPRP+CBT-I         | CBT       | 2022 | USA         | 53.4  | 15.0   | 26    | 21  | 2. informal_ISI    | 3. phy_others               | 55  | 4  |
| Currie2000 | CBT                | CBT       | 2000 | Canada      | 45.0  | 8.0    | 32    | *   | 1. formal_DSM      | 4. psy_phy_mixed            | 32  | 7  |
| Currie2000 | WLC                | WL        | 2000 | Canada      | 45.0  | 8.0    | 28    | *   | 1. formal_DSM      | 4. psy_phy_mixed            | 28  | 1  |
| Currie2004 | Self-help manual   | CBT       | 2004 | Canada      | 43.3  | 10.9   | 20    | 6   | 1. formal_DSM      | 2. psy_substance_dependence | 20  | 3  |
| Currie2004 | Individual therapy | CBT       | 2004 | Canada      | 43.3  | 10.9   | 20    | 6   | 1. formal_DSM      | 2. psy_substance_dependence | 20  | 6  |
| Currie2004 | Wait-list          | WL        | 2004 | Canada      | 43.3  | 10.9   | 20    | 6   | 1. formal_DSM      | 2. psy_substance_dependence | 20  | 1  |
| Daren2012  | Intervention       | BT        | 2012 | USA         | 52.2  | 18.8   | 5     | 3   | 1. formal_DSM      | 4. psy_phy_mixed            | 5   | 3  |
| Daren2012  | Control            | PE        | 2012 | USA         | 52.2  | 18.8   | 4     | 2   | 1. formal_DSM      | 4. psy_phy_mixed            | 4   | 1  |
| Dean2019   | Experimental       | BT        | 2019 | USA         | 65.6  | 7.3    | 16    | 10  | 2. informal_ISI    | 3. phy_cancer               | 21  | 9  |
| Dean2019   | Control            | PE        | 2019 | USA         | 65.9  | 8.1    | 14    | 9   | 2. informal_ISI    | 3. phy_cancer               | 19  | 1  |
| Dekker2020 | ICBTI w 1-4        | CBT       | 2020 | Netherlands | 51.3  | 11.5   | 87    | 65  | 1. formal_DSM      | 1. primary_secondary_mixed  | 87  | 16 |
| Dekker2020 | ICBTI w 6-9        | WL        | 2020 | Netherlands | 50.6  | 11.0   | 88    | 73  | 1. formal_DSM      | 1. primary_secondary_mixed  | 88  | 3  |

| trial       | Arm                 | treatment | Year | Country | Age_m | Age_sd | Age_n | F_n | Insomnia diagnosis    | Comorbidities              | n  | r  |
|-------------|---------------------|-----------|------|---------|-------|--------|-------|-----|-----------------------|----------------------------|----|----|
| Dirksen2008 | CBT-I               | BT        | 2008 | USA     | 57.2  | 9.9    | 34    | 40  | 3. others             | 3. phy_cancer              | 40 | 3  |
| Dirksen2008 | CC                  | PE        | 2008 | USA     | 59.2  | 10.7   | 38    | 41  | 3. others             | 3. phy_cancer              | 41 | 2  |
| Drake2019   | SRT                 | BT        | 2019 | USA     | 56.8  | 5.4    | 50    | 50  | 1. formal_DSM         | 3. phy_menopause           | 52 | 19 |
| Drake2019   | CBTI                | CBT       | 2019 | USA     | 55.3  | 5.9    | 50    | 50  | 1. formal_DSM         | 3. phy_menopause           | 52 | 27 |
| Drake2019   | SHE                 | PE        | 2019 | USA     | 57.2  | 5.6    | 50    | 50  | 1. formal_DSM         | 3. phy_menopause           | 50 | 2  |
| Dyrberg2022 | CBT-I               | CBT       | 2022 | Denmark | 36.1  | *      | 22    | 14  | 1. formal_DSM         | 2. psy_MDD                 | 23 | 3  |
| Dyrberg2022 | TAU                 | WL        | 2022 | Denmark | 38.3  | *      | 19    | 14  | 1. formal_DSM         | 2. psy_MDD                 | 24 | 2  |
| Edinger2001 | CBT                 | CBT       | 2001 | USA     | 55.8  | 12.2   | 25    | 11  | 1. formal_DSM         | 0. primary_insomnia        | 25 | 16 |
| Edinger2001 | Placebo therapy     | PE        | 2001 | USA     | 55.7  | 9.5    | 25    | 13  | 1. formal_DSM         | 0. primary_insomnia        | 25 | 5  |
| Edinger2001 | Relaxation training | RT        | 2001 | USA     | 54.5  | 10.2   | 25    | 11  | 1. formal_DSM         | 0. primary_insomnia        | 25 | 8  |
| Edinger2003 | ACBT                | BT        | 2003 | USA     | 51.0  | 13.7   | 10    | 1   | 1. formal_DSM         | 0. primary_insomnia        | 10 | 2  |
| Edinger2003 | SHC                 | PE        | 2003 | USA     | 51.0  | 13.7   | 10    | 1   | 1. formal_DSM         | 0. primary_insomnia        | 10 | 0  |
| Edinger2005 | CBT                 | CBT       | 2005 | USA     | 50.1  | 6.9    | 18    | 17  | 1. formal_DSM         | 3. phy_fibromyalgia        | 18 | 10 |
| Edinger2005 | SH                  | PE        | 2005 | USA     | 46.5  | 9.0    | 18    | 17  | 1. formal_DSM         | 3. phy_fibromyalgia        | 18 | 13 |
| Edinger2005 | UC                  | WL        | 2005 | USA     | 48.3  | 9.1    | 11    | 11  | 1. formal_DSM         | 3. phy_fibromyalgia        | 11 | 2  |
| Edinger2007 | CBT combined        | BT        | 2007 | USA     | 55.9  | 10.0   | 75    | 39  | 1. formal_DSM         | 0. primary_insomnia        | 75 | 32 |
| Edinger2007 | WL                  | WL        | 2007 | USA     | 52.4  | 7.3    | 11    | 4   | 1. formal_DSM         | 0. primary_insomnia        | 11 | 0  |
| Edinger2009 | CBT                 | CBT       | 2009 | USA     | 54.4  | 13.9   | 41    | 6   | 1. formal_Edinger2004 | 1. primary_secondary_mixed | 41 | 19 |
| Edinger2009 | SH                  | PE        | 2009 | USA     | 54.0  | 13.7   | 40    | 5   | 1. formal_Edinger2004 | 1. primary_secondary_mixed | 40 | 10 |

| trial                | Arm                         | treatment | Year | Country | Age_m | Age_sd | Age_n | F_n | Insomnia diagnosis | Comorbidities              | n  | r  |
|----------------------|-----------------------------|-----------|------|---------|-------|--------|-------|-----|--------------------|----------------------------|----|----|
| EIRafahiFerreira2021 | ACT-BBI-I                   | CBT       | 2021 | Brazil  | 40.2  | 10.5   | 22    | 13  | 1. formal_DSM      | 1. primary_secondary_mixed | 22 | 5  |
| EIRafahiFerreira2021 | CBT-I                       | CBT       | 2021 | Brazil  | 40.2  | 10.5   | 23    | 14  | 1. formal_DSM      | 1. primary_secondary_mixed | 23 | 8  |
| EIRafahiFerreira2022 | CBT-I                       | CBT       | 2022 | Brazil  | 43.3  | 10.0   | 17    | 12  | 1. formal_DSM      | 1. primary_secondary_mixed | 18 | 10 |
| EIRafahiFerreira2022 | ACT-I                       | CT        | 2022 | Brazil  | 44.2  | 11.4   | 18    | 14  | 1. formal_DSM      | 1. primary_secondary_mixed | 19 | 4  |
| Epstein2007          | Multicomponent intervention | BT        | 2007 | USA     | 57.1  | 9.8    | 34    | 34  | 1. formal_DSM      | 3. phy_cancer              | 40 | 4  |
| Epstein2007          | Control                     | PE        | 2007 | USA     | 59.1  | 10.6   | 38    | 38  | 1. formal_DSM      | 3. phy_cancer              | 41 | 8  |
| Eptein2012           | SCT                         | BT        | 2012 | USA     | 71.0  | 8.3    | 44    | 31  | 3. others          | 0. primary_insomnia        | 44 | 11 |
| Eptein2012           | SRT                         | BT        | 2012 | USA     | 68.0  | 8.3    | 44    | 25  | 3. others          | 0. primary_insomnia        | 44 | 8  |
| Eptein2012           | MCI                         | BT        | 2012 | USA     | 67.2  | 6.6    | 41    | 27  | 3. others          | 0. primary_insomnia        | 41 | 16 |
| Eptein2012           | WLC                         | WL        | 2012 | USA     | 69.5  | 8.3    | 50    | 29  | 3. others          | 0. primary_insomnia        | 50 | 2  |
| Espie1989            | Paradoxical intention       | BT        | 1989 | UK      | 43.7  | 15.8   | 15    | 12  | 3. others          | 0. primary_insomnia        | 18 | 6  |
| Espie1989            | Stimulus control            | BT        | 1989 | UK      | 44.9  | 14.4   | 14    | 10  | 3. others          | 0. primary_insomnia        | 17 | 10 |
| Espie1989            | Placebo                     | PE        | 1989 | UK      | 42.4  | 15.3   | 14    | 10  | 3. others          | 0. primary_insomnia        | 17 | 2  |
| Espie1989            | Progressive relaxation      | RT        | 1989 | UK      | 48.1  | 10.6   | 14    | 7   | 3. others          | 0. primary_insomnia        | 17 | 1  |
| Espie1989            | No treatment                | WL        | 1989 | UK      | 45.3  | 20.9   | 13    | 8   | 3. others          | 0. primary_insomnia        | 16 | 1  |
| Espie2001            | CBT                         | CBT       | 2001 | UK      | 51.4  | 17.0   | 74    | 48  | 1. formal_ICSD     | 0. primary_insomnia        | 74 | 21 |
| Espie2001            | SMC                         | WL        | 2001 | UK      | 51.4  | 17.0   | 65    | 47  | 1. formal_ICSD     | 0. primary_insomnia        | 65 | 4  |

| trial          | Arm                | treatment | Year | Country     | Age_m | Age_sd | Age_n | F_n | Insomnia diagnosis    | Comorbidities              | n   | r   |
|----------------|--------------------|-----------|------|-------------|-------|--------|-------|-----|-----------------------|----------------------------|-----|-----|
| Espie2007      | CBT                | CBT       | 2007 | UK          | 54.4  | 15.4   | 107   | 72  | 1. formal_DSM         | 1. primary_secondary_mixed | 107 | 16  |
| Espie2007      | TAU                | PE        | 2007 | UK          | 54.1  | 14.4   | 94    | 65  | 1. formal_DSM         | 1. primary_secondary_mixed | 94  | 5   |
| Espie2008      | CBT                | CBT       | 2008 | UK          | 60.5  | 12.4   | 100   | 69  | 1. formal_DSM         | 3. phy_cancer              | 100 | 40  |
| Espie2008      | TAU                | PE        | 2008 | UK          | 58.0  | 11.9   | 50    | 34  | 1. formal_DSM         | 3. phy_cancer              | 50  | 13  |
| Espie2012      | CBT                | CBT       | 2012 | UK          | 50.7  | 13.8   | 55    | 40  | 1. formal_DSM         | 0. primary_insomnia        | 55  | 31  |
| Espie2012      | IRT                | WL        | 2012 | UK          | 47.3  | 13.0   | 55    | 42  | 1. formal_DSM         | 0. primary_insomnia        | 55  | 11  |
| Espie2012      | TAU                | WL        | 2012 | UK          | 49.1  | 13.7   | 54    | 38  | 1. formal_DSM         | 0. primary_insomnia        | 54  | 7   |
| Espie2019      | dCBT               | CBT       | 2019 | UK          | 48.4  | 13.9   | 853   | 654 | 1. formal_DSM         | 4. psy_phy_mixed           | 858 | 362 |
| Espie2019      | SHE                | PE        | 2019 | UK          | 47.7  | 13.6   | 858   | 675 | 1. formal_DSM         | 4. psy_phy_mixed           | 853 | 96  |
| Falloon2015    | SSR                | BT        | 2015 | NZ          | 55.4  | 12.7   | 46    | 39  | 1. formal_Edinger2004 | 0. primary_insomnia        | 46  | 19  |
| Falloon2015    | Control            | PE        | 2015 | NZ          | 51.8  | 13.4   | 51    | 36  | 1. formal_Edinger2004 | 0. primary_insomnia        | 51  | 8   |
| Farsani2021    | CBT-I              | CBT       | 2021 | Iran        | 51.4  | 3.0    | 22    | 22  | 1. formal_DSM         | 3. phy_menopause           | 23  | 12  |
| Farsani2021    | Control            | WL        | 2021 | Iran        | 52.4  | 3.5    | 23    | 23  | 1. formal_DSM         | 3. phy_menopause           | 23  | 0   |
| Felder2020     | digital CBTI       | CBT       | 2020 | USA         | 33.9  | 3.4    | 105   | 105 | 1. formal_DSM         | 3. phy_pregnancy_perinatal | 105 | 38  |
| Felder2020     | Standard treatment | WL        | 2020 | USA         | 33.2  | 4.0    | 103   | 103 | 1. formal_DSM         | 3. phy_pregnancy_perinatal | 103 | 26  |
| Fernando2013   | intervention       | BT        | 2013 | New Zealand | 58.0  | *      | 22    | 15  | 1. formal_DSM         | 0. primary_insomnia        | 22  | 16  |
| Fernando2013   | control            | PE        | 2013 | New Zealand | 53.0  | *      | 23    | 13  | 1. formal_DSM         | 0. primary_insomnia        | 23  | 8   |
| Feuerstein2017 | cb-CBT-I           | CBT       | 2017 | USA         | 48.0  | 10.0   | 16    | 9   | 2. informal_ISI       | 2. psy_mixed               | 18  | 1   |
| Feuerstein2017 | Sleep Diary        | PE        | 2017 | USA         | 50.0  | 10.0   | 18    | 10  | 2. informal_ISI       | 2. psy_mixed               | 16  | 0   |

| trial       | Arm           | treatment | Year | Country     | Age_m | Age_sd | Age_n | F_n  | Insomnia diagnosis | Comorbidities                  | n    | r   |
|-------------|---------------|-----------|------|-------------|-------|--------|-------|------|--------------------|--------------------------------|------|-----|
| Ford2022    | eCBT-I        | CBT       | 2022 | Netherlands | 53.0  | 14.0   | 27    | 15   | 1. formal_DSM      | 3. phy_others                  | 27   | 11  |
| Ford2022    | TAU           | WL        | 2022 | Netherlands | 56.0  | 16.0   | 25    | 17   | 1. formal_DSM      | 3. phy_others                  | 25   | 1   |
| Fowler2009  | CBT           | CBT       | 2009 | Canada      | 67.7  | 5.9    | 22    | 22   | 3. others          | 1. primary_secondary_mixed     | 24   | 9   |
| Fowler2009  | SC            | PE        | 2009 | Canada      | 68.2  | 5.1    | 23    | 23   | 3. others          | 1. primary_secondary_mixed     | 23   | 0   |
| Freeman2015 | CBT           | CBT       | 2015 | UK          | 39.6  | 11.6   | 24    | 8    | 2. informal_ISI    | psy_schizophrenia_or_psychosis | 24   | 8   |
| Freeman2015 | standard care | PE        | 2015 | UK          | 42.2  | 13.5   | 26    | 8    | 2. informal_ISI    | psy_schizophrenia_or_psychosis | 26   | 2   |
| Freeman2017 | Treatment     | CBT       | 2017 | UK          | 24.8  | 7.7    | 1891  | 1361 | 2. informal_SCI    | 1. primary_secondary_mixed     | 1891 | 271 |
| Freeman2017 | Contrl        | TAU       | 2017 | UK          | 24.6  | 7.6    | 1864  | 1315 | 2. informal_SCI    | 1. primary_secondary_mixed     | 1864 | 172 |
| Fucito2014  | CBT-I+SC      | CBT       | 2014 | USA         | 51.9  | 15.1   | 7     | 4    | 1. formal_DSM      | psy_substance_dependence       | 9    | 3   |
| Fucito2014  | SC            | PE        | 2014 | USA         | 51.2  | 10.7   | 10    | 5    | 1. formal_DSM      | psy_substance_dependence       | 10   | 2   |
| Garcia2018  | Intervention  | CBT       | 2018 | Brazil      | 55.2  | 6.1    | 19    | 19   | 1. formal_DSM      | 3. phy_menopause               | 21   | 18  |

| trial          | Arm                 | treatment | Year | Country   | Age_m | Age_sd | Age_n | F_n | Insomnia diagnosis | Comorbidities              | n  | r  |
|----------------|---------------------|-----------|------|-----------|-------|--------|-------|-----|--------------------|----------------------------|----|----|
| Garcia2018     | Control             | PLB       | 2018 | Brazil    | 56.7  | 4.0    | 11    | 11  | 1. formal_DSM      | 3. phy_menopause           | 14 | 0  |
| Garland2014    | CBT-I               | CBT       | 2014 | Canada    | 58.7  | 10.5   | 40    | 32  | 1. formal_DSM      | 3. phy_cancer              | 47 | 20 |
| Garland2014    | MBSR                | CBT       | 2014 | Canada    | 60.3  | 12.2   | 32    | 20  | 1. formal_DSM      | 3. phy_cancer              | 64 | 11 |
| Gebara2019     | Immediate BBTI      | BT        | 2019 | USA       | 64.0  | 2.5    | 6     | 2   | 1. formal_DSM      | 2. psy_MDD                 | 6  | 1  |
| Gebara2019     | Delayed BBTI        | WL        | 2019 | USA       | 66.2  | 5.4    | 5     | 1   | 1. formal_DSM      | 2. psy_MDD                 | 5  | 1  |
| Gehrman2020    | In Person           | CBT       | 2020 | USA       | 54.6  | 12.5   | 46    | 5   | 2. informal_ISI    | 2. psy_PTSD                | 47 | 4  |
| Gehrman2020    | Telehealth          | CBT       | 2020 | USA       | 55.6  | 12.1   | 49    | 4   | 2. informal_ISI    | 2. psy_PTSD                | 49 | 2  |
| Gehrman2021    | In-person           | CBT       | 2021 | USA       | 33.7  | 10.6   | 20    | 13  | 1. formal_DSM      | 1. primary_secondary_mixed | 20 | 16 |
| Gehrman2021    | Telehealth          | CBT       | 2021 | USA       | 33.1  | 10.0   | 21    | 13  | 1. formal_DSM      | 1. primary_secondary_mixed | 21 | 15 |
| Gehrman2021    | Waitlist            | WL        | 2021 | USA       | 31.2  | 8.7    | 19    | 13  | 1. formal_DSM      | 1. primary_secondary_mixed | 19 | 0  |
| Germain2014    | BBTI-MV             | BT        | 2014 | USA       | 40.9  | 12.0   | 20    | 5   | 1. formal_ICSD     | 1. primary_secondary_mixed | 20 | 9  |
| Germain2014    | Information Control | WL        | 2014 | USA       | 35.9  | 11.2   | 20    | 1   | 1. formal_ICSD     | 1. primary_secondary_mixed | 20 | 5  |
| Gieselmann2019 | F2F                 | BT        | 2019 | Germany   | 39.3  | 14.5   | 27    | 13  | 1. formal_DSM      | 0. primary_insomnia        | 28 | 7  |
| Gieselmann2019 | Chat                | BT        | 2019 | Germany   | 39.7  | 11.2   | 23    | 13  | 1. formal_DSM      | 0. primary_insomnia        | 23 | 12 |
| Gieselmann2019 | WL                  | WL        | 2019 | Germany   | 42.7  | 11.7   | 22    | 12  | 1. formal_DSM      | 0. primary_insomnia        | 22 | 2  |
| Glozier2019    | SHUTi               | CBT       | 2019 | Australia | 58.6  | 6.3    | 45    | 0   | 2. informal_ISI    | 2. psy_MDD                 | 45 | 14 |
| Glozier2019    | Control             | PE        | 2019 | Australia | 58.1  | 6.1    | 42    | 0   | 2. informal_ISI    | 2. psy_MDD                 | 42 | 6  |

| trial          | Arm               | treatment | Year | Country      | Age_m | Age_sd | Age_n | F_n | Insomnia diagnosis                        | Comorbidities                  | n  | r  |
|----------------|-------------------|-----------|------|--------------|-------|--------|-------|-----|-------------------------------------------|--------------------------------|----|----|
| Greeff1998     | Treatment         | RT        | 1998 | South Africa | 45.5  | 9.5    | 11    | 0   | 3. others                                 | 2.<br>psy_substance_dependence | 11 | 3  |
| Greeff1998     | Control           | WL        | 1998 | South Africa | 45.5  | 9.5    | 11    | 0   | 3. others                                 | 2.<br>psy_substance_dependence | 11 | 1  |
| Guarnaccia2023 | MBS-I             | CT        | 2023 | USA          | 50.8  | 10.1   | 24    | 20  | 2. informal_ISI                           | 3. phy_others                  | 27 | 6  |
| Guarnaccia2023 | SH                | PE        | 2023 | USA          | 50.9  | 10.8   | 26    | 21  | 2. informal_ISI                           | 3. phy_others                  | 26 | 1  |
| Hagatun2019    | SHUTi             | CBT       | 2019 | Norway       | 45.0  | 12.4   | 95    | 61  | 1. formal_DSM                             | 0. primary_insomnia            | 95 | 40 |
| Hagatun2019    | Patient education | PE        | 2019 | Norway       | 44.8  | 13.7   | 86    | 61  | 1. formal_DSM                             | 0. primary_insomnia            | 86 | 5  |
| Hall2022       | CBTI              | CBT       | 2022 | USA          | 51.2  | 17.1   | 20    | 18  | 1. formal_DSM                             | 1.<br>primary_secondary_mixed  | 20 | 8  |
| Hall2022       | EUC               | PE        | 2022 | USA          | 55.3  | 10.3   | 20    | 16  | 1. formal_DSM                             | 1.<br>primary_secondary_mixed  | 20 | 2  |
| Ham2020        | Experimental      | CBT       | 2020 | South Korea  | 53.8  | 6.6    | 24    | 28  | 2.<br>informal_other_self_reported_scales | 1.<br>primary_secondary_mixed  | 28 | 9  |
| Ham2020        | Control           | PE        | 2020 | South Korea  | 55.5  | 4.4    | 20    | 30  | 2.<br>informal_other_self_reported_scales | 1.<br>primary_secondary_mixed  | 30 | 1  |
| Harris2012-1   | ISR+SCT           | BT        | 2012 | Australia    | 36.9  | 11.5   | 20    | 17  | 3. others                                 | 0. primary_insomnia            | 20 | 7  |
| Harris2012-1   | ISR               | PE        | 2012 | Australia    | 38.5  | 13.3   | 19    | 11  | 3. others                                 | 0. primary_insomnia            | 19 | 2  |
| Harris2012-2   | SCT               | BT        | 2012 | USA          | 42.2  | 13.1   | 20    | 15  | 3. others                                 | 0. primary_insomnia            | 20 | 2  |
| Harris2012-2   | CONTROL           | PE        | 2012 | USA          | 43.8  | 13.8   | 20    | 13  | 3. others                                 | 0. primary_insomnia            | 20 | 0  |

| trial         | Arm              | treatment | Year | Country        | Age_m | Age_sd | Age_n | F_n | Insomnia diagnosis    | Comorbidities                 | n   | r  |
|---------------|------------------|-----------|------|----------------|-------|--------|-------|-----|-----------------------|-------------------------------|-----|----|
| Harris2019    | BI               | BT        | 2019 | USA            | 55.7  | 12.2   | 12    | 8   | 2. informal_ISI       | 3. phy_heart_failure          | 12  | 5  |
| Harris2019    | SMC              | PE        | 2019 | USA            | 55.6  | 10.8   | 11    | 8   | 2. informal_ISI       | 3. phy_heart_failure          | 11  | 1  |
| Harvey2014    | BT               | BT        | 2014 | USA,<br>Canada | 48.5  | 13.6   | 63    | 40  | 1. formal_DSM         | 4. psy_phy_mixed              | 63  | 22 |
| Harvey2014    | CBT              | CBT       | 2014 | USA,<br>Canada | 46.9  | 11.3   | 60    | 32  | 1. formal_DSM         | 4. psy_phy_mixed              | 60  | 33 |
| Harvey2014    | CT               | CT        | 2014 | USA,<br>Canada | 46.7  | 12.8   | 65    | 45  | 1. formal_DSM         | 4. psy_phy_mixed              | 65  | 18 |
| Harvey2015    | CBTI-BP          | CBT       | 2015 | USA            | 37.7  | 12.4   | 30    | 19  | 1. formal_DSM         | 2. psy_bipolar                | 30  | 17 |
| Harvey2015    | PE               | RT        | 2015 | USA            | 35.5  | 9.3    | 28    | 17  | 1. formal_DSM         | 2. psy_bipolar                | 28  | 3  |
| Ho2014        | SHS              | CBT       | 2014 | Hong<br>Kong   | 36.9  | 13.0   | 103   | 73  | 3. others             | 1.<br>primary_secondary_mixed | 103 | 16 |
| Ho2014        | SH               | CBT       | 2014 | Hong<br>Kong   | 38.6  | 11.8   | 104   | 70  | 3. others             | 1.<br>primary_secondary_mixed | 104 | 20 |
| Ho2014        | WL               | WL        | 2014 | Hong<br>Kong   | 39.9  | 12.7   | 105   | 79  | 3. others             | 1.<br>primary_secondary_mixed | 105 | 10 |
| Ho2021        | CBT              | CBT       | 2021 | Hong<br>Kong   | 43.1  | 14.3   | 13    | 11  | 2. informal_ISI       | 1.<br>primary_secondary_mixed | 13  | 3  |
| Ho2021        | WL               | WL        | 2021 | Hong<br>Kong   | 36.6  | 11.7   | 13    | 9   | 2. informal_ISI       | 1.<br>primary_secondary_mixed | 13  | 0  |
| Holmqvist2014 | Telehealth-based | CBT       | 2014 | Canada         | *     | *      | *     | 27  | 1. formal_Edinger2004 | 1.<br>primary_secondary_mixed | 34  | 18 |
| Holmqvist2014 | Web-based        | CBT       | 2014 | Canada         | *     | *      | *     | 28  | 1. formal_Edinger2004 | 1.<br>primary_secondary_mixed | 39  | 24 |



| trial                | Arm                     | treatment | Year | Country     | Age_m | Age_sd | Age_n | F_n | Insomnia diagnosis    | Comorbidities              | n  | r  |
|----------------------|-------------------------|-----------|------|-------------|-------|--------|-------|-----|-----------------------|----------------------------|----|----|
| Horsch2017           | App                     | BT        | 2017 | Netherlands | 39.0  | 13.0   | 79    | 45  | 1. formal_DSM         | 1. primary_secondary_mixed | 74 | 17 |
| Horsch2017           | WI                      | WL        | 2017 | Netherlands | 41.0  | 13.9   | 74    | 49  | 1. formal_DSM         | 1. primary_secondary_mixed | 79 | 6  |
| Hou2014              | Treatment               | BT        | 2014 | China       | 54.5  | 13.8   | 51    | 31  | 2. informal_PSQI      | 3. phy_others              | 52 | 0  |
| Hou2014              | Control                 | NT        | 2014 | China       | 52.4  | 14.5   | 47    | 25  | 2. informal_PSQI      | 3. phy_others              | 51 | 0  |
| Jacobs1993           | SC                      | BT        | 1993 | USA         | 36.7  | *      | 10    | 8   | 3. others             | 0. primary_insomnia        | 10 | 6  |
| Jacobs1993           | MF                      | BT        | 1993 | USA         | 36.7  | *      | 10    | 8   | 3. others             | 0. primary_insomnia        | 10 | 9  |
| Jacobs2004           | Combination             | CBT       | 2004 | USA         | 49.1  | 9.6    | 18    | 12  | 1. formal_DSM         | 0. primary_insomnia        | 18 | 6  |
| Jacobs2004           | Pharmacotherapy         | PE        | 2004 | USA         | 45.4  | 9.3    | 15    | 11  | 1. formal_DSM         | 0. primary_insomnia        | 15 | 2  |
| JanssonFrojmark2012a | BT                      | BT        | 2012 | Sweden      | 55.2  | 10.7   | 11    | 6   | 1. formal_Edinger2004 | 0. primary_insomnia        | 11 | 0  |
| JanssonFrojmark2012a | BT+CW                   | CBT       | 2012 | Sweden      | 57.8  | 14.7   | 10    | 5   | 1. formal_Edinger2004 | 0. primary_insomnia        | 11 | 0  |
| JanssonFrojmark2012b | CBT-I                   | CBT       | 2012 | Sweden      | 57.8  | 6.6    | 17    | 10  | 1. formal_DSM         | 3. phy_others              | 17 | 4  |
| JanssonFrojmark2012b | WLC                     | WL        | 2012 | Sweden      | 53.6  | 10.4   | 15    | 10  | 1. formal_DSM         | 3. phy_others              | 15 | 0  |
| Jarnefelt2020        | Group-based CBT-I       | CBT       | 2020 | Finland     | 45.0  | 10.4   | 26    | 18  | 1. formal_ICD         | 3. phy_others              | 30 | 5  |
| Jarnefelt2020        | Self-help-based CBT-I   | CBT       | 2020 | Finland     | 41.0  | 10.4   | 27    | 21  | 1. formal_ICD         | 3. phy_others              | 29 | 4  |
| Jarnefelt2020        | Sleep hygiene education | PE        | 2020 | Finland     | 47.0  | 10.4   | 22    | 17  | 1. formal_ICD         | 3. phy_others              | 24 | 5  |

| trial         | Arm                        | treatment | Year | Country | Age_m | Age_sd | Age_n | F_n | Insomnia diagnosis    | Comorbidities              | n   | r  |
|---------------|----------------------------|-----------|------|---------|-------|--------|-------|-----|-----------------------|----------------------------|-----|----|
| Javaheri2020  | Intervention               | CBT       | 2020 | USA     | 70.3  | 10.0   | 18    | 11  | 2. informal_ISI       | 3. phy_heart_failure       | 18  | 6  |
| Javaheri2020  | Control                    | PE        | 2020 | USA     | 72.9  | 9.2    | 16    | 14  | 2. informal_ISI       | 3. phy_heart_failure       | 16  | 3  |
| Jernelov2012  | Bibliotherapy with support | CBT       | 2012 | Sweden  | 50.8  | 11.8   | 44    | 33  | 1. formal_Edinger2004 | 1. primary_secondary_mixed | 44  | 27 |
| Jernelov2012  | Bibliotherapy              | CBT       | 2012 | Sweden  | 47.4  | 13.3   | 45    | 36  | 1. formal_Edinger2004 | 1. primary_secondary_mixed | 45  | 11 |
| Jernelov2012  | Wait list                  | WL        | 2012 | Sweden  | 45.4  | 16.0   | 44    | 40  | 1. formal_Edinger2004 | 1. primary_secondary_mixed | 44  | 1  |
| Johann2020    | Treatment                  | CBT       | 2020 | Germany | 40.8  | 14.0   | 23    | 14  | 1. formal_DSM         | 0. primary_insomnia        | 23  | 14 |
| Johann2020    | Control                    | WL        | 2020 | Germany | 41.2  | 15.1   | 23    | 15  | 1. formal_DSM         | 0. primary_insomnia        | 23  | 3  |
| Jungquist2010 | Treatment                  | CBT       | 2010 | USA     | 52.0  | 9.9    | 19    | 16  | 3. others             | 3. phy_others              | 19  | 15 |
| Jungquist2010 | Control                    | PE        | 2010 | USA     | 43.0  | 10.7   | 9     | 8   | 3. others             | 3. phy_others              | 9   | 2  |
| Kaku2012      | Intervention               | BT        | 2012 | Japan   | 35.6  | 9.8    | 82    | 9   | 2. informal_AIS       | 0. primary_insomnia        | 111 | 24 |
| Kaku2012      | Control                    | WL        | 2012 | Japan   | 37.0  | 10.2   | 69    | 12  | 2. informal_AIS       | 0. primary_insomnia        | 112 | 7  |
| Kaldo2015     | Control                    | CBT       | 2015 | Sweden  | 49.0  | 15.6   | 75    | 57  | 1. formal_Edinger2004 | 1. primary_secondary_mixed | 75  | 11 |
| Kaldo2015     | Treatment                  | CBT       | 2015 | Sweden  | 47.0  | 15.2   | 73    | 59  | 1. formal_Edinger2004 | 1. primary_secondary_mixed | 73  | 31 |
| Kaldo2020     | Selfhelp book-group        | CBT       | 2020 | Sweden  | 52.2  | 10.7   | 20    | 17  | 1. formal_Edinger2004 | 1. primary_secondary_mixed | 20  | 8  |
| Kaldo2020     | CAU                        | WL        | 2020 | Sweden  | 57.9  | 10.8   | 20    | 15  | 1. formal_Edinger2004 | 1. primary_secondary_mixed | 20  | 2  |
| Kallestad2021 | FtF CBT-I                  | CBT       | 2021 | Norway  | 41.3  | 12.5   | 52    | 41  | 1. formal_DSM         | 1. primary_secondary_mixed | 52  | 26 |

| trial         | Arm                 | treatment | Year | Country     | Age_m | Age_sd | Age_n | F_n | Insomnia diagnosis | Comorbidities              | n  | r  |
|---------------|---------------------|-----------|------|-------------|-------|--------|-------|-----|--------------------|----------------------------|----|----|
| Kallestad2021 | dCBT-I              | CBT       | 2021 | Norway      | 41.4  | 10.5   | 49    | 35  | 1. formal_DSM      | 1. primary_secondary_mixed | 49 | 8  |
| Kalmbach2020  | CBT-I               | CBT       | 2020 | USA         | 28.9  | 4.1    | 46    | 46  | 2. informal_ISI    | 3. phy_pregnancy_perinatal | 46 | 16 |
| Kalmbach2020  | Control             | PE        | 2020 | USA         | 29.2  | 4.1    | 45    | 45  | 2. informal_ISI    | 3. phy_pregnancy_perinatal | 45 | 8  |
| Kapella2011   | CBT-I               | CBT       | 2011 | USA         | 65.0  | 9.0    | 9     | 2   | 2. informal_ISI    | 3. phy_others              | 9  | 2  |
| Kapella2011   | WE                  | PE        | 2011 | USA         | 60.0  | 10.0   | 9     | 2   | 2. informal_ISI    | 3. phy_others              | 9  | 1  |
| Kapella2022   | CBT-I+AC or COPD-ED | CBT       | 2022 | USA         | 64.0  | 8.0    | 55    | 20  | 2. informal_ISI    | 3. phy_others              | 55 | 16 |
| Kapella2022   | AC+AC or COPD-ED    | PE        | 2022 | USA         | 65.0  | 9.0    | 54    | 20  | 2. informal_ISI    | 3. phy_others              | 54 | 6  |
| Kennet2021    | Intervention        | CBT       | 2021 | Australia   | 27.6  | 10.4   | 14    | 14  | 2. informal_ISI    | 0. primary_insomnia        | 18 | 9  |
| Kennet2021    | Waitlist            | WL        | 2021 | Australia   | 31.5  | 13.6   | 13    | 12  | 2. informal_ISI    | 0. primary_insomnia        | 14 | 1  |
| Krieger2019   | SRT                 | BT        | 2019 | Switzerland | 46.6  | 17.5   | 41    | 28  | 1. formal_ICSD     | 0. primary_insomnia        | 41 | 10 |
| Krieger2019   | MCT                 | CBT       | 2019 | Switzerland | 42.2  | 12.4   | 42    | 26  | 1. formal_ICSD     | 0. primary_insomnia        | 42 | 16 |
| Krieger2019   | CAU                 | WL        | 2019 | Switzerland | 45.2  | 12.4   | 21    | 17  | 1. formal_ICSD     | 0. primary_insomnia        | 21 | 1  |
| Kuhn2022      | Insomnia Coach      | CBT       | 2022 | USA         | 44.0  | 7.6    | 25    | 14  | 2. informal_ISI    | 1. primary_secondary_mixed | 25 | 3  |
| Kuhn2022      | Wait-list           | WL        | 2022 | USA         | 45.0  | 8.1    | 25    | 7   | 2. informal_ISI    | 1. primary_secondary_mixed | 25 | 1  |

| trial           | Arm            | treatment | Year | Country     | Age_m | Age_sd | Age_n | F_n | Insomnia diagnosis | Comorbidities              | n   | r   |
|-----------------|----------------|-----------|------|-------------|-------|--------|-------|-----|--------------------|----------------------------|-----|-----|
| Kyle2020        | dCBT           | CBT       | 2020 | UK          | 52.5  | 11.2   | 205   | 175 | 1. formal_DSM      | 1. primary_secondary_mixed | 205 | 42  |
| Kyle2020        | WLC            | WL        | 2020 | UK          | 52.4  | 11.7   | 205   | 180 | 1. formal_DSM      | 1. primary_secondary_mixed | 205 | 4   |
| Lami2018        | CBT-IP         | CBT       | 2018 | Spain       | 49.7  | 8.4    | 38    | 42  | 1. formal_DSM      | 3. phy_fibromyalgia        | 42  | 1   |
| Lami2018        | CBT-P          | PLB       | 2018 | Spain       | 49.4  | 6.4    | 34    | 42  | 1. formal_DSM      | 3. phy_fibromyalgia        | 42  | 1   |
| Lancee2012      | Electronic+Pen | CBT       | 2012 | Netherlands | 51.7  | 12.1   | 417   | 298 | 1. formal_DSM      | 1. primary_secondary_mixed | 422 | 162 |
| Lancee2012      | Waitlist       | WL        | 2012 | Netherlands | 51.9  | 12.2   | 200   | 136 | 1. formal_DSM      | 1. primary_secondary_mixed | 202 | 28  |
| Lancee2013      | No support     | CBT       | 2013 | Netherlands | 47.4  | 11.8   | 133   | 98  | 1. formal_DSM      | 1. primary_secondary_mixed | 133 | 25  |
| Lancee2013      | Support        | CBT       | 2013 | Netherlands | 49.3  | 13.2   | 129   | 99  | 1. formal_DSM      | 1. primary_secondary_mixed | 129 | 52  |
| Lancee2015      | CBT-I          | CBT       | 2015 | Netherlands | 47.5  | 14.4   | 36    | 30  | 1. formal_DSM      | 1. primary_secondary_mixed | 36  | 12  |
| Lancee2015      | Wait-list      | WL        | 2015 | Netherlands | 50.0  | 13.7   | 27    | 20  | 1. formal_DSM      | 1. primary_secondary_mixed | 27  | 3   |
| Lancee2016      | f2f            | CBT       | 2016 | Netherlands | 38.5  | 13.1   | 30    | 22  | 1. formal_DSM      | 1. primary_secondary_mixed | 30  | 22  |
| Lancee2016      | Online         | CBT       | 2016 | Netherlands | 41.2  | 14.1   | 30    | 26  | 1. formal_DSM      | 1. primary_secondary_mixed | 30  | 6   |
| Lancee2016      | WL             | WL        | 2016 | Netherlands | 45.1  | 13.7   | 30    | 25  | 1. formal_DSM      | 1. primary_secondary_mixed | 30  | 2   |
| Lappalainen2019 | iACT           | CBT       | 2019 | Finland     | 56.1  | 11.1   | 43    | 32  | 2. informal_ISI    | 0. primary_insomnia        | 43  | 37  |

| trial           | Arm                | treatment | Year | Country      | Age_m | Age_sd | Age_n | F_n | Insomnia diagnosis | Comorbidities       | n  | r  |
|-----------------|--------------------|-----------|------|--------------|-------|--------|-------|-----|--------------------|---------------------|----|----|
| Lappalainen2019 | WLC                | WL        | 2019 | Finland      | 50.8  | 15.3   | 40    | 21  | 2. informal_ISI    | 0. primary_insomnia | 43 | 26 |
| Latocha2022     | CBTI               | BT        | 2022 | Denmark      | 60.0  | 10.0   | 31    | 28  | 1. formal_ICSD     | 3. phy_others       | 31 | 11 |
| Latocha2022     | UC                 | PE        | 2022 | Denmark      | 57.0  | 11.0   | 31    | 27  | 1. formal_ICSD     | 3. phy_others       | 31 | 0  |
| Leerssen2022-1  | CBT-I              | CBT       | 2022 | Netherlands  | 47.4  | 13.3   | 31    | 23  | 1. formal_DSM      | 0. primary_insomnia | 31 | 9  |
| Leerssen2022-1  | NT                 | PE        | 2022 | Netherlands  | 47.9  | 12.2   | 35    | 25  | 1. formal_DSM      | 0. primary_insomnia | 35 | 2  |
| Leerssen2022-2  | CBT-I+CRS          | CBT       | 2022 | Netherlands  | 47.9  | 12.8   | 32    | 24  | 1. formal_DSM      | 0. primary_insomnia | 32 | 7  |
| Leerssen2022-2  | CRS                | PE        | 2022 | Netherlands  | 49.2  | 13.5   | 34    | 25  | 1. formal_DSM      | 0. primary_insomnia | 34 | 5  |
| Lichstein2000   | Treatment          | BT        | 2000 | USA          | 67.1  | 6.1    | 23    | 11  | 1. formal_ICSD     | 4. psy_phy_mixed    | 23 | 17 |
| Lichstein2000   | Control            | WL        | 2000 | USA          | 70.1  | 6.8    | 21    | 10  | 1. formal_ICSD     | 4. psy_phy_mixed    | 21 | 11 |
| Lichstein2001   | Placebo            | PE        | 2001 | USA          | 68.0  | 5.9    | 23    | 15  | 1. formal_ICSD     | 0. primary_insomnia | 29 | 15 |
| Lichstein2001   | Relaxation         | RT        | 2001 | USA          | 68.1  | 8.3    | 27    | 21  | 1. formal_ICSD     | 0. primary_insomnia | 30 | 19 |
| Liu2022-1       | Control            | NT        | 2022 | China        | 51.41 | 10.1   | 34    | 32  | 2. informal_PSQI   | 3. phy_cancer       | 34 | 1  |
| Liu2022-1       | MBSR               | CT        | 2022 | China        | 48.58 | 8.48   | 38    | 36  | 2. informal_PSQI   | 3. phy_cancer       | 38 | 8  |
| Liu2022-2       | Acupressure        | PLB       | 2022 | China        | 53.06 | 8.29   | 36    | 36  | 2. informal_PSQI   | 3. phy_cancer       | 36 | 9  |
| Liu2022-2       | MBSR + Acupressure | CT        | 2022 | China        | 52.67 | 8.19   | 39    | 39  | 2. informal_PSQI   | 3. phy_cancer       | 39 | 15 |
| Lopez2019       | eCBT-I             | CBT       | 2019 | France       | 46.0  | 14.9   | 23    | 19  | 1. formal_DSM      | 0. primary_insomnia | 23 | 4  |
| Lopez2019       | mPT                | PE        | 2019 | France       | 45.0  | 17.6   | 23    | 15  | 1. formal_DSM      | 0. primary_insomnia | 23 | 1  |
| Lorenz2019      | Treatment          | CBT       | 2019 | Switzerland, | 41.7  | 17.3   | 29    | 21  | 1. formal_DSM      | 0. primary_insomnia | 29 | 14 |

| trial      | Arm          | treatment | Year | Country                                        | Age_m | Age_sd | Age_n | F_n | Insomnia diagnosis | Comorbidities              | n   | r  |
|------------|--------------|-----------|------|------------------------------------------------|-------|--------|-------|-----|--------------------|----------------------------|-----|----|
| Lorenz2019 | Control      | WL        | 2019 | Austria, Germany Switzerland, Austria, Germany | 44.0  | 20.1   | 27    | 18  | 1. formal_DSM      | 0. primary_insomnia        | 27  | 3  |
| Lovato2014 | CBT-I        | CBT       | 2014 | Australia                                      | 64.0  | *      | 86    | 43  | 2. informal_PSQI   | 0. primary_insomnia        | 86  | 33 |
| Lovato2014 | Waitlist     | WL        | 2014 | Australia                                      | 64.0  | *      | 32    | 16  | 2. informal_PSQI   | 0. primary_insomnia        | 32  | 1  |
| Low2020    | Mindfulness  | CT        | 2020 | Australia                                      | 36.4  | 11.7   | 12    | 10  | 2. informal_ISI    | 0. primary_insomnia        | 12  | 6  |
| Low2020    | PMR          | RT        | 2020 | Australia                                      | 36.4  | 11.7   | 11    | 10  | 2. informal_ISI    | 0. primary_insomnia        | 11  | 5  |
| Maguen2021 | BBTI         | BT        | 2021 | USA                                            | 49.5  | 15.7   | 46    | 9   | 1. formal_DSM      | 1. primary_secondary_mixed | 46  | 21 |
| Maguen2021 | PMRT         | RT        | 2021 | USA                                            | 50.0  | 15.3   | 45    | 8   | 1. formal_DSM      | 1. primary_secondary_mixed | 45  | 8  |
| Majd2020   | CBTI         | CBT       | 2020 | Iran                                           | 36.2  | 5.9    | 156   | 84  | 1. formal_DSM      | 0. primary_insomnia        | 156 | 28 |
| Majd2020   | PE           | PE        | 2020 | Iran                                           | 35.3  | 5.8    | 156   | 90  | 1. formal_DSM      | 0. primary_insomnia        | 156 | 5  |
| Manber2008 | EsCIT+CBTI   | CBT       | 2008 | USA                                            | 49.5  | 13.6   | 15    | 8   | 1. formal_DSM      | 2. psy_MDD                 | 15  | 5  |
| Manber2008 | EsCIT+CTRL   | PE        | 2008 | USA                                            | 47.8  | 13.4   | 15    | 10  | 1. formal_DSM      | 2. psy_MDD                 | 15  | 1  |
| Manber2016 | CBTI         | CBT       | 2016 | USA                                            | 48.3  | 12.7   | 75    | 53  | 1. formal_DSM      | 2. psy_MDD                 | 75  | 31 |
| Manber2016 | CTRL         | PE        | 2016 | USA                                            | 45.0  | 12.3   | 75    | 57  | 1. formal_DSM      | 2. psy_MDD                 | 75  | 15 |
| Manber2019 | CBTI         | CBT       | 2019 | USA                                            | 33.4  | 5.2    | 89    | 96  | 1. formal_DSM      | 3. phy_pregnancy_perinatal | 96  | 57 |
| Manber2019 | CTRL         | PE        | 2019 | USA                                            | 32.6  | 4.9    | 90    | 98  | 1. formal_DSM      | 3. phy_pregnancy_perinatal | 98  | 47 |
| Mao2018    | Intervention | CBT       | 2018 | China                                          | 43.3  | 12.0   | 52    | 38  | 1. formal_DSM      | 0. primary_insomnia        | 52  | 4  |

| trial        | Arm         | treatment | Year | Country | Age_m | Age_sd | Age_n | F_n | Insomnia diagnosis                            | Comorbidities       | n   | r  |
|--------------|-------------|-----------|------|---------|-------|--------|-------|-----|-----------------------------------------------|---------------------|-----|----|
| Mao2018      | Control     | PE        | 2018 | China   | 42.5  | 9.9    | 52    | 36  | 1. formal_DSM                                 | 0. primary_insomnia | 52  | 1  |
| Marino2001   | CBTI        | CBT       | 2001 | Canada  | 41.5  | *      | 35    | 22  | 1. formal_ICSD                                | 0. primary_insomnia | 35  | 0  |
| Marino2001   | WL          | WL        | 2001 | Canada  | 41.5  | *      | 35    | 24  | 1. formal_ICSD                                | 0. primary_insomnia | 35  | 0  |
| Marks2023    | CBTI        | CBT       | 2023 | UK      | 54.0  | 12.59  | 33    | 14  | 2. informal_ISI                               | 3. phy_others       | 33  | 18 |
| Marks2023    | ABC         | RT        | 2023 | UK      | 52.5  | 14.44  | 34    | 18  | 2. informal_ISI                               | 3. phy_others       | 34  | 5  |
| Marks2023    | SSG         | PE        | 2023 | UK      | 51.0  | 10.37  | 35    | 17  | 2. informal_ISI                               | 3. phy_others       | 35  | 0  |
| Martinez2014 | CBT-I       | CBT       | 2014 | Spain   | 46.5  | 6.3    | 30    | 30  | 1. formal_DSM                                 | 3. phy_fibromyalgia | 32  | 2  |
| Martinez2014 | SH          | WL        | 2014 | Spain   | 48.7  | 7.3    | 29    | 29  | 1. formal_DSM<br>2.                           | 3. phy_fibromyalgia | 32  | 0  |
| Matthews2014 | CBTI        | CBT       | 2014 | USA     | 52.2  | 6.9    | 30    | 30  | informal_other_self_reported<br>_scales<br>2. | 3. phy_cancer       | 32  | 11 |
| Matthews2014 | BPT         | PE        | 2014 | USA     | 52.9  | 7.8    | 26    | 26  | informal_other_self_reported<br>_scales       | 3. phy_cancer       | 28  | 6  |
| McCrae2007   | MBT         | BT        | 2007 | USA     | 77.2  | 8.0    | 11    | 7   | 1. formal_DSM                                 | 0. primary_insomnia | 12  | 9  |
| McCrae2007   | SHE         | PE        | 2007 | USA     | 77.2  | 8.0    | 9     | 7   | 1. formal_DSM                                 | 0. primary_insomnia | 9   | 3  |
| McCrae2019   | CBT-I       | CBT       | 2019 | USA     | 54.1  | 11.0   | 39    | 39  | 3. others                                     | 3. phy_fibromyalgia | 39  | 28 |
| McCrae2019   | WLC         | WL        | 2019 | USA     | 52.3  | 11.2   | 37    | 37  | 3. others                                     | 3. phy_fibromyalgia | 37  | 12 |
| McCrae2020   | BBTi        | BT        | 2020 | USA     | 68.0  | 6.0    | 32    | 22  | 3. others                                     | 0. primary_insomnia | 32  | 9  |
| McCrae2020   | SMC         | PE        | 2020 | USA     | 71.0  | 9.1    | 30    | 20  | 3. others                                     | 0. primary_insomnia | 30  | 2  |
| McCurry2016  | CBT-I       | CBT       | 2016 | USA     | 55.0  | 3.5    | 53    | 53  | 2. informal_ISI                               | 3. phy_menopause    | 53  | 33 |
| McCurry2016  | MEC         | PE        | 2016 | USA     | 54.7  | 4.7    | 53    | 53  | 2. informal_ISI                               | 3. phy_menopause    | 53  | 10 |
| McCurry2021  | CBT-I       | CBT       | 2021 | USA     | 70.1  | 7.1    | 163   | 124 | 2. informal_ISI                               | 3. phy_others       | 163 | 79 |
| McCurry2021  | EOC         | PE        | 2021 | USA     | 70.4  | 6.5    | 164   | 120 | 2. informal_ISI                               | 3. phy_others       | 164 | 37 |
| Means2000    | Treated SWI | RT        | 2000 | USA     | 21.0  | 5.3    | 28    | 19  | 1. formal_ICSD                                | 0. primary_insomnia | 28  | 17 |

| trial        | Arm                                      | treatment | Year | Country | Age_m | Age_sd | Age_n | F_n | Insomnia diagnosis | Comorbidities               | n  | r  |
|--------------|------------------------------------------|-----------|------|---------|-------|--------|-------|-----|--------------------|-----------------------------|----|----|
| Means2000    | Untreated SWI                            | WL        | 2000 | USA     | 20.2  | 4.4    | 29    | 20  | 1. formal_ICSD     | 0. primary_insomnia         | 29 | 12 |
| Milby1993    | Triazolam plus behavioral therapy        | BT        | 1993 | USA     | 32.5  | 5.9    | 8     | 4   | 1. formal_DSM      | 0. primary_insomnia         | 8  | 2  |
| Milby1993    | Triazolam plus sleep-related information | PE        | 1993 | USA     | 32.5  | 5.9    | 7     | 4   | 1. formal_DSM      | 0. primary_insomnia         | 7  | 1  |
| Miller2021   | CBT-I                                    | CBT       | 2021 | USA     | 22.3  | 2.7    | 28    | 22  | 1. formal_DSM      | 2. psy_substance_dependence | 28 | 10 |
| Miller2021   | SE                                       | PE        | 2021 | USA     | 22.5  | 2.8    | 28    | 20  | 1. formal_DSM      | 2. psy_substance_dependence | 28 | 4  |
| Miller2023   | CBT-I                                    | CBT       | 2023 | USA     | 45.6  | 11.9   | 32    | 3   | 1. formal_DSM      | 2. psy_substance_dependence | 32 | 21 |
| Miller2023   | Sleep hygiene                            | PE        | 2023 | USA     | 46.9  | 11.9   | 35    | 3   | 1. formal_DSM      | 2. psy_substance_dependence | 35 | 10 |
| Mimeault1999 | BT                                       | CBT       | 1999 | Canada  | 49.8  | 13.3   | 18    | 10  | 1. formal_DSM      | 0. primary_insomnia         | 22 | 4  |
| Mimeault1999 | BTPC                                     | CBT       | 1999 | Canada  | 45.6  | 8.5    | 18    | 11  | 1. formal_DSM      | 0. primary_insomnia         | 18 | 5  |
| Mimeault1999 | WLC                                      | WL        | 1999 | Canada  | 56.9  | 13.4   | 18    | 11  | 1. formal_DSM      | 0. primary_insomnia         | 18 | 1  |
| Miro2011     | CBT                                      | CBT       | 2011 | Spain   | 43.9  | 6.1    | 16    | 22  | 1. formal_DSM      | 3. phy_fibromyalgia         | 22 | 2  |
| Miro2011     | SH                                       | WL        | 2011 | Spain   | 50.2  | 6.1    | 15    | 22  | 1. formal_DSM      | 3. phy_fibromyalgia         | 22 | 0  |



| trial               | Arm            | treatment | Year | Country   | Age_m | Age_sd | Age_n | F_n | Insomnia diagnosis | Comorbidities       | n   | r |
|---------------------|----------------|-----------|------|-----------|-------|--------|-------|-----|--------------------|---------------------|-----|---|
| Morawetz1989(SO L)  | Therapist      | BT        | 1989 | Australia | 44.0  | *      | 16    | *   | 3. others          | 0. primary_insomnia | 16  | 7 |
| Morawetz1989(SO L)  | Tape           | BT        | 1989 | Australia | 44.0  | *      | 16    | *   | 3. others          | 0. primary_insomnia | 16  | 8 |
| Morawetz1989(SO L)  | WL             | WL        | 1989 | Australia | 44.0  | *      | 18    | *   | 3. others          | 0. primary_insomnia | 18  | 4 |
| Morawetz1989(WA SO) | Tape           | BT        | 1989 | Australia | 44.0  | *      | 7     | *   | 3. others          | 0. primary_insomnia | 7   | 4 |
| Morawetz1989(WA SO) | WL             | WL        | 1989 | Australia | 44.0  | *      | 12    | *   | 3. others          | 0. primary_insomnia | 12  | 4 |
| Morgan2012          | Treatment      | CBT       | 2012 | UK        | 67.0  | 7.9    | 98    | 68  | 1. formal_DSM      | 3. phy_mixed        | 99  | 9 |
| Morgan2012          | TAU            | PE        | 2012 | UK        | 66.3  | 6.9    | 95    | 60  | 1. formal_DSM      | 3. phy_mixed        | 103 | 7 |
| Morin1988           | SC             | BT        | 1988 | USA       | 68.4  | 5.7    | 9     | 6   | 3. others          | 0. primary_insomnia | 9   | 3 |
| Morin1988           | IR             | PE        | 1988 | USA       | 67.5  | 4.9    | 8     | 6   | 3. others          | 0. primary_insomnia | 8   | 1 |
| Morin1988           | WL             | WL        | 1988 | USA       | 66.4  | 6.4    | 10    | 5   | 3. others          | 0. primary_insomnia | 10  | 1 |
| Morin1993           | CBT            | CBT       | 1993 | USA       | 67.1  | 5.3    | 12    | 9   | 1. formal_ICSD     | 0. primary_insomnia | 12  | 9 |
| Morin1993           | WLC            | WL        | 1993 | USA       | 67.1  | 5.3    | 12    | 9   | 1. formal_ICSD     | 0. primary_insomnia | 12  | 4 |
| Morin1999           | Combined       | CBT       | 1999 | USA       | 65.2  | 6.9    | 19    | 13  | 1. formal_DSM      | 0. primary_insomnia | 20  | 1 |
| Morin1999           | PCT            | PE        | 1999 | USA       | 64.1  | 6.4    | 17    | 9   | 1. formal_DSM      | 0. primary_insomnia | 20  | 0 |
| NCT00127790-1       | CBT-I          | CBT       | 2012 | USA       | 45.7  | 8.2    | 6     | 4   | 3. others          | 3. phy_others       | 6   | 4 |
| NCT00127790-1       | WL             | WL        | 2012 | USA       | 52.3  | 1.0    | 4     | 2   | 3. others          | 3. phy_others       | 4   | 0 |
| NCT00127790-2       | CBT-P          | CBT       | 2012 | USA       | 55.8  | 9.8    | 5     | 2   | 3. others          | 3. phy_others       | 5   | 0 |
| NCT00127790-2       | CBT-P/I        | CBT       | 2012 | USA       | 50.5  | 8.5    | 6     | 6   | 3. others          | 3. phy_others       | 6   | 5 |
| NCT01011218-1       | BBTI-Armodafil | BT        | 2018 | USA       | 49.1  | 10.5   | 9     | 9   | 2. informal_ISI    | 3. phy_cancer       | 9   | 2 |

| trial            | Arm                      | treatment | Year | Country | Age_m | Age_sd | Age_n | F_n | Insomnia diagnosis | Comorbidities                  | n   | r  |
|------------------|--------------------------|-----------|------|---------|-------|--------|-------|-----|--------------------|--------------------------------|-----|----|
| NCT01011218-1    | BP-Armodafil             | PE        | 2018 | USA     | 46.7  | 9.2    | 9     | 9   | 2. informal_ISI    | 3. phy_cancer                  | 9   | 3  |
| NCT01011218-2    | BBTI-without armodafil   | BT        | 2018 | USA     | 51.5  | 9.0    | 23    | 26  | 2. informal_ISI    | 3. phy_cancer                  | 26  | 12 |
| NCT01011218-2    | BP-without armodafil     | PE        | 2018 | USA     | 50.3  | 8.6    | 24    | 26  | 2. informal_ISI    | 3. phy_cancer                  | 26  | 7  |
| NCT01987089      | CBTI                     | CBT       | 2020 | USA     | 51.6  | 10.9   | 31    | 3   | 2. informal_ISI    | 2.<br>psy_substance_dependence | 31  | 12 |
| NCT01987089      | QDT                      | PE        | 2020 | USA     | 51.5  | 8.2    | 32    | 2   | 2. informal_ISI    | 2.<br>psy_substance_dependence | 32  | 9  |
| NCT02613364      | CBTI                     | CBT       | 2021 | USA     | 56.0  | *      | 238   | 216 | 1. formal_DSM      | 3. phy_cancer                  | 238 | 70 |
| NCT02613364      | Educational intervention | TAU       | 2021 | USA     | 57.0  | *      | 251   | 236 | 1. formal_DSM      | 3. phy_cancer                  | 251 | 23 |
| NCT03964974      | CBTI-CU                  | CBT       | 2022 | USA     | 36.7  | 12.0   | 30    | 23  | 2. informal_ISI    | 2.<br>psy_substance_dependence | 30  | 6  |
| NCT03964974      | SHE                      | PE        | 2022 | USA     | 38.7  | 13.7   | 27    | 20  | 2. informal_ISI    | 2.<br>psy_substance_dependence | 27  | 3  |
| NorellClarke2015 | CBT-I                    | CBT       | 2015 | Sweden  | 49.3  | 12.5   | 32    | 22  | 1. formal_DSM      | 2. psy_MDD                     | 32  | 13 |
| NorellClarke2015 | RT                       | RT        | 2015 | Sweden  | 53.7  | 12.4   | 32    | 27  | 1. formal_DSM      | 2. psy_MDD                     | 32  | 3  |
| Okajima2020      | tailored+standard BBTI   | BT        | 2020 | Japan   | 43.0  | 11.5   | 47    | 17  | 2. informal_ISI    | 0. primary_insomnia            | 47  | 10 |

| trial       | Arm             | treatment | Year | Country | Age_m | Age_sd | Age_n | F_n | Insomnia diagnosis                  | Comorbidities              | n  | r  |
|-------------|-----------------|-----------|------|---------|-------|--------|-------|-----|-------------------------------------|----------------------------|----|----|
| Okajima2020 | self-monitoring | WL        | 2020 | Japan   | 43.9  | 11.3   | 23    | 7   | 2. informal_ISI                     | 0. primary_insomnia        | 23 | 4  |
| Okajima2020 | waitig list     | WL        | 2020 | Japan   | 40.7  | 10.9   | 22    | 8   | 2. informal_ISI                     | 0. primary_insomnia        | 22 | 5  |
| Okajima2021 | REFRESH         | CBT       | 2022 | Japan   | 19.6  | 1.9    | 24    | 16  | 2. informal_ISI                     | 1. primary_secondary_mixed | 24 | 11 |
| Okajima2021 | Self-Monitoring | PE        | 2022 | Japan   | 19.6  | 1.9    | 24    | 16  | 2. informal_ISI                     | 1. primary_secondary_mixed | 24 | 0  |
| Ong2018     | MBTI            | CBT       | 2014 | USA     | 42.4  | *      | 15    | 12  | 1. formal_Edinger2004               | 0. primary_insomnia        | 19 | 5  |
| Ong2018     | MBSR            | CT        | 2014 | USA     | 41.9  | *      | 13    | 9   | 1. formal_Edinger2004               | 0. primary_insomnia        | 19 | 6  |
| Ong2018     | SMC             | WL        | 2014 | USA     | 45.4  | *      | 16    | 11  | 1. formal_Edinger2004               | 0. primary_insomnia        | 16 | 1  |
| Ong2020     | Arm B           | CBT       | 2020 | USA     | 53.2  | 11.1   | 39    | 25  | 1. formal_Edinger2004               | 3. phy_others              | 39 | 26 |
| Ong2020     | Arm C           | PE        | 2020 | USA     | 49.2  | 15.1   | 38    | 18  | 1. formal_Edinger2004               | 3. phy_others              | 39 | 15 |
| Oswald2022  | Intervention    | CBT       | 2022 | USA     | 56.9  | 8.9    | 15    | 15  | 2. informal_ISI                     | 3. phy_cancer              | 15 | 6  |
| Oswald2022  | Control         | WL        | 2022 | USA     | 60.0  | 9.6    | 15    | 15  | 2. informal_ISI                     | 3. phy_cancer              | 15 | 3  |
| Padron2022  | CBTi.p.         | CBT       | 2022 | USA     | 58.9  | 12.2   | 18    | 18  | 3. others                           | 3. phy_cancer              | 18 | 12 |
| Padron2022  | PE              | PE        | 2022 | USA     | 59.9  | 10.3   | 17    | 17  | 3. others                           | 3. phy_cancer              | 17 | 7  |
| Palesh2018  | BBT-CI          | BT        | 2018 | USA     | 50.9  | 7.9    | 34    | 34  | 2. informal_ISI                     | 3. phy_cancer              | 34 | 9  |
| Palesh2018  | HEAL            | TAU       | 2018 | USA     | 53.8  | 11.2   | 37    | 37  | 2. informal_ISI                     | 3. phy_cancer              | 37 | 4  |
| Palesh2020  | BBT-I           | BT        | 2020 | USA     | 50.9  | 9.3    | 35    | 37  | informal_other_self_reported_scales | 3. phy_cancer              | 36 | 16 |
| Palesh2020  | Sleep education | PE        | 2020 | USA     | 49.4  | 8.8    | 35    | 37  | informal_other_self_reported_scales | 3. phy_cancer              | 37 | 10 |
| Patel2017   | Case            | CBT       | 2017 | USA     | 63.1  | 6.8    | 14    | 3   | 2. informal_ISI                     | 3. phy_others              | 14 | 4  |

| trial           | Arm               | treatment | Year | Country | Age_m | Age_sd | Age_n | F_n | Insomnia diagnosis | Comorbidities                 | n   | r  |
|-----------------|-------------------|-----------|------|---------|-------|--------|-------|-----|--------------------|-------------------------------|-----|----|
| Patel2017       | Control           | PE        | 2017 | USA     | 64.7  | 9.5    | 14    | 9   | 2. informal_ISI    | 3. phy_others                 | 14  | 2  |
| Perlis2004      | M+CBT             | CBT       | 2004 | USA     | 35.0  | 11.7   | 10    | 8   | 1. formal_ICSD     | 0. primary_insomnia           | 10  | 9  |
| Perlis2004      | M+CC              | PE        | 2004 | USA     | 42.4  | 13.8   | 8     | 5   | 1. formal_ICSD     | 0. primary_insomnia           | 10  | 6  |
| Perrault2022    | TX                | CBT       | 2022 | Canada  | 48.8  | 17.0   | 33    | 25  | 1. formal_ICSD     | 1.<br>primary_secondary_mixed | 33  | 12 |
| Perrault2022    | WL                | WL        | 2022 | Canada  | 56.0  | 15.6   | 29    | 22  | 1. formal_ICSD     | 1.<br>primary_secondary_mixed | 29  | 1  |
| Pigeon2017      | CBT-I             | CBT       | 2017 | USA     | 56.9  | 10.0   | 13    | 1   | 2. informal_ISI    | 2. psy_MDD                    | 18  | 2  |
| Pigeon2017      | SH                | PE        | 2017 | USA     | 59.9  | 9.3    | 14    | 2   | 2. informal_ISI    | 2. psy_MDD                    | 18  | 2  |
| Pigeon2019      | CBTi              | CBT       | 2019 | USA     | 52.8  | 14.5   | 24    | 5   | 2. informal_ISI    | 2. psy_mixed                  | 27  | 11 |
| Pigeon2019      | TAU               | TAU       | 2019 | USA     | 56.8  | 11.0   | 26    | 5   | 2. informal_ISI    | 2. psy_mixed                  | 27  | 0  |
| Pigeon2022      | CBTI+CPT          | CBT       | 2021 | USA     | 34.2  | 10.8   | 56    | 54  | 2. informal_ISI    | 2. psy_PTSD                   | 56  | 8  |
| Pigeon2022      | Control+CPT       | PE        | 2021 | USA     | 36.8  | 10.9   | 54    | 53  | 2. informal_ISI    | 2. psy_PTSD                   | 54  | 1  |
| Pillai2015      | CBTI              | CBT       | 2015 | USA     | 53.2  | 12.2   | 13    | 12  | 1. formal_DSM      | 2. psy_anxiety                | 19  | 11 |
| Pillai2015      | IC                | PE        | 2015 | USA     | 44.0  | 13.2   | 9     | 8   | 1. formal_DSM      | 2. psy_anxiety                | 13  | 4  |
| Prados2020      | CBTI-C            | CBT       | 2020 | Spain   | 49.0  | 9.5    | 17    | 20  | 1. formal_DSM      | 3. phy_fibromyalgia           | 20  | 1  |
| Prados2020      | CBTI-P            | CBT       | 2020 | Spain   | 51.2  | 5.3    | 15    | 19  | 1. formal_DSM      | 3. phy_fibromyalgia           | 19  | 0  |
| Quintiliani2017 | PI+               | CT        | 2017 | Italy   | 64.4  | 12.9   | 19    | 10  | 1. formal_ICSD     | 0. primary_insomnia           | 20  | 5  |
| Quintiliani2017 | PI-               | PE        | 2017 | Italy   | 59.6  | 14.4   | 19    | 14  | 1. formal_ICSD     | 0. primary_insomnia           | 20  | 3  |
| Redeker2015     | CBTI              | CBT       | 2015 | USA     | 61.9  | 13.3   | 29    | 15  | 2. informal_ISI    | 3. phy_heart_failure          | 31  | 15 |
| Redeker2015     | Attention Control | WL        | 2015 | USA     | 55.2  | 16.2   | 19    | 10  | 2. informal_ISI    | 3. phy_heart_failure          | 21  | 6  |
| Redeker2022     | CBT-I             | CBT       | 2022 | USA     | 62.0  | 13.1   | 91    | 38  | 2. informal_ISI    | 3. phy_heart_failure          | 100 | 28 |
| Redeker2022     | Attention Control | PE        | 2022 | USA     | 64.1  | 12.6   | 84    | 37  | 2. informal_ISI    | 3. phy_heart_failure          | 89  | 17 |

| trial          | Arm               | treatment | Year | Country   | Age_m | Age_sd | Age_n | F_n | Insomnia diagnosis | Comorbidities                    | n   | r  |
|----------------|-------------------|-----------|------|-----------|-------|--------|-------|-----|--------------------|----------------------------------|-----|----|
| Ritterband2009 | SHUTi             | CBT       | 2009 | USA       | 44.7  | 10.6   | 22    | 18  | 1. formal_DSM      | 0. primary_insomnia              | 22  | 16 |
| Ritterband2009 | Wait-list         | WL        | 2009 | USA       | 45.1  | 11.7   | 22    | 16  | 1. formal_DSM      | 0. primary_insomnia              | 22  | 0  |
| Ritterband2012 | Internet          | CBT       | 2012 | USA       | 53.7  | 10.8   | 14    | 14  | 1. formal_DSM      | 3. phy_cancer                    | 14  | 6  |
| Ritterband2012 | Control           | WL        | 2012 | USA       | 59.6  | 12.3   | 14    | 10  | 1. formal_DSM      | 3. phy_cancer                    | 14  | 1  |
| Ritterband2017 | SHUTi             | CBT       | 2017 | USA       | 43.8  | 11.3   | 151   | 103 | 3. others          | 1. primary_secondary_mixed       | 151 | 54 |
| Ritterband2017 | Patient education | PE        | 2017 | USA       | 42.8  | 11.9   | 152   | 115 | 3. others          | 1. primary_secondary_mixed<br>2. | 152 | 16 |
| Robabeh2015    | CBT               | CBT       | 2015 | Iran      | 43.5  | 8.3    | 11    | 0   | 1. formal_DSM      | psy_substance_dependence<br>2.   | 11  | 7  |
| Robabeh2015    | BPT               | PE        | 2015 | Iran      | 44.7  | 7.8    | 11    | 0   | 1. formal_DSM      | psy_substance_dependence         | 11  | 3  |
| Roscoe2015-1   | CBTI+placebo      | CBT       | 2015 | USA       | 59.0  | 9.9    | 24    | 21  | 3. others          | 3. phy_cancer                    | 24  | 12 |
| Roscoe2015-1   | placebo           | PE        | 2015 | USA       | 52.0  | 11.5   | 25    | 18  | 3. others          | 3. phy_cancer                    | 25  | 5  |
| Roscoe2015-2   | CBTI+armodafil    | CBT       | 2015 | USA       | 56.0  | 10.2   | 23    | 22  | 3. others          | 3. phy_cancer                    | 23  | 14 |
| Roscoe2015-2   | armodafil         | PE        | 2015 | USA       | 57.0  | 7.4    | 24    | 23  | 3. others          | 3. phy_cancer                    | 24  | 3  |
| Rosen2000      | Education control | PE        | 2000 | USA       | 46.8  | 8.3    | 11    | 8   | 1. formal_ICSD     | 0. primary_insomnia              | 14  | 3  |
| Rosen2000      | M+G               | RT        | 2000 | USA       | 48.6  | 12.0   | 21    | 13  | 1. formal_ICSD     | 0. primary_insomnia              | 27  | 11 |
| Rybarczyk2005  | CBT               | CBT       | 2005 | USA       | 70.1  | 9.1    | 46    | 28  | 3. others          | 3. phy_mixed                     | 46  | 3  |
| Rybarczyk2005  | SMW               | CT        | 2005 | USA       | 67.7  | 7.9    | 46    | 34  | 3. others          | 3. phy_mixed                     | 46  | 1  |
| Sadler2018     | CBT-I             | CBT       | 2018 | Australia | 74.7  | 7.1    | 24    | 15  | 1. formal_DSM      | 2. psy_MDD                       | 24  | 7  |

| trial          | Arm          | treatment | Year | Country   | Age_m | Age_sd | Age_n | F_n | Insomnia diagnosis | Comorbidities                 | n   | r  |
|----------------|--------------|-----------|------|-----------|-------|--------|-------|-----|--------------------|-------------------------------|-----|----|
| Sadler2018     | PCG          | PE        | 2018 | Australia | 72.3  | 7.6    | 23    | 12  | 1. formal_DSM      | 2. psy_MDD                    | 23  | 1  |
| Sandlund2017   | Intervention | CBT       | 2017 | Sweden    | 55.0  | 17.1   | 90    | 64  | 3. others          | 1.<br>primary_secondary_mixed | 90  | 51 |
| Sandlund2017   | Control      | WL        | 2017 | Sweden    | 54.0  | 14.7   | 75    | 56  | 3. others          | 1.<br>primary_secondary_mixed | 75  | 10 |
| Sato2019       | ICBT+UC      | CBT       | 2019 | Japan     | 49.4  | 13.8   | 11    | 9   | 1. formal_DSM      | 1.<br>primary_secondary_mixed | 11  | 4  |
| Sato2019       | UC           | WL        | 2019 | Japan     | 50.5  | 8.8    | 12    | 9   | 1. formal_DSM      | 1.<br>primary_secondary_mixed | 12  | 0  |
| Sato2022       | ICBT         | CBT       | 2022 | Japan     | 49.8  | 11.1   | 79    | 32  | 2. informal_PSQI   | 1.<br>primary_secondary_mixed | 106 | 18 |
| Sato2022       | WLC          | WL        | 2022 | Japan     | 51.0  | 10.4   | 103   | 41  | 2. informal_PSQI   | 1.<br>primary_secondary_mixed | 103 | 12 |
| Savard2005     | CBT          | CBT       | 2005 | Canada    | 54.8  | 7.0    | 27    | 27  | 1. formal_DSM      | 3. phy_cancer                 | 28  | 16 |
| Savard2005     | WL           | WL        | 2005 | Canada    | 53.4  | 7.7    | 30    | 30  | 1. formal_DSM      | 3. phy_cancer                 | 30  | 3  |
| Savard2014     | PCBT-I       | CBT       | 2014 | Canada    | 52.6  | 8.9    | 81    | 81  | 2. informal_ISI    | 3. phy_cancer                 | 81  | 58 |
| Savard2014     | VCBT-I       | CBT       | 2014 | Canada    | 55.3  | 8.7    | 80    | 80  | 2. informal_ISI    | 3. phy_cancer                 | 80  | 35 |
| Savard2014     | CTL          | PE        | 2014 | Canada    | 55.4  | 8.8    | 81    | 81  | 2. informal_ISI    | 3. phy_cancer                 | 81  | 21 |
| Schuffelen2023 | dCBT-I       | CBT       | 2023 | Germany   | 44.27 | 14.25  | 118   | 82  | 1. formal_DSM      | 1.<br>primary_secondary_mixed | 118 | 48 |
| Schuffelen2023 | Control      | WL        | 2023 | Germany   | 43.20 | 13.57  | 120   | 79  | 1. formal_DSM      | 1.<br>primary_secondary_mixed | 120 | 2  |
| Sgoifo2017     | Exposed      | CBT       | 2017 | Italy     | *     | *      | *     | *   | 1. formal_ICSD     | 3. phy_others                 | 24  | 3  |
| Sgoifo2017     | Control      | WL        | 2017 | Italy     | *     | *      | *     | *   | 1. formal_ICSD     | 3. phy_others                 | 24  | 1  |
| Sheaves2018    | STAC         | CBT       | 2018 | UK        | 40.0  | 12.0   | 20    | 0   | 2. informal_ISI    | 2. psy_mixed                  | 20  | 8  |

| trial          | Arm          | treatment | Year | Country     | Age_m | Age_sd | Age_n | F_n | Insomnia diagnosis    | Comorbidities                 | n  | r  |
|----------------|--------------|-----------|------|-------------|-------|--------|-------|-----|-----------------------|-------------------------------|----|----|
| Sheaves2018    | standard     | TAU       | 2018 | UK          | 40.0  | 14.0   | 20    | 0   | 2. informal_ISI       | 2. psy_mixed                  | 20 | 4  |
| Shimamoto2022  | SPA          | BT        | 2022 | Japan       | 37.7  | 11.7   | 37    | 15  | 2. informal_ISI       | 1.<br>primary_secondary_mixed | 62 | 30 |
| Shimamoto2022  | Control      | WL        | 2022 | Japan       | 45.0  | 10.7   | 34    | 11  | 2. informal_ISI       | 1.<br>primary_secondary_mixed | 56 | 18 |
| Shin2023       | CBT-I        | CBT       | 2023 | South Korea | 59.33 | 7.43   | 12    | 10  | 1. formal_ICSD        | 0. primary_insomnia           | 15 | 5  |
| Shin2023       | ACT          | CT        | 2023 | South Korea | 60.00 | 8.81   | 14    | 8   | 1. formal_ICSD        | 0. primary_insomnia           | 15 | 4  |
| Short2021      | BBTI         | BT        | 2021 | USA         | 21.0  | 4.9    | 28    | 16  | 2. informal_ISI       | 2. psy_mixed                  | 28 | 9  |
| Short2021      | Control      | WL        | 2021 | USA         | 20.4  | 2.8    | 28    | 11  | 2. informal_ISI       | 2. psy_mixed                  | 28 | 4  |
| Siebmns2021    | Intervention | CBT       | 2021 | Sweden      | 72.5  | 9.5    | 24    | 7   | 1. formal_ICD         | 3. phy_others                 | 24 | 5  |
| Siebmns2021    | Control      | WL        | 2021 | Sweden      | 72.6  | 10.4   | 24    | 10  | 1. formal_ICD         | 3. phy_others                 | 24 | 1  |
| Siengsukon2020 | CBTI         | CBT       | 2020 | USA         | 51.1  | 7.9    | 10    | 9   | 2. informal_ISI       | 3. phy_others                 | 12 | 9  |
| Siengsukon2020 | BE           | PE        | 2020 | USA         | 50.4  | 12.4   | 10    | 8   | 2. informal_ISI       | 3. phy_others                 | 11 | 2  |
| Siengsukon2020 | AC           | TAU       | 2020 | USA         | 56.9  | 10.1   | 10    | 10  | 2. informal_ISI       | 3. phy_others                 | 10 | 5  |
| Siengsukon2021 | wCBT-I       | CBT       | 2021 | USA         | 50.1  | 11.8   | 10    | 10  | 2. informal_ISI       | 3. phy_others                 | 21 | 6  |
| Siengsukon2021 | wCBT-I+calls | CBT       | 2021 | USA         | 53.8  | 6.9    | 10    | 9   | 2. informal_ISI       | 3. phy_others                 | 20 | 3  |
| Simeit2004     | PMR          | CBT       | 2004 | Germany     | 60.2  | 9.2    | 80    | 56  | 1. formal_DSM         | 3. phy_cancer                 | 80 | 40 |
| Simeit2004     | C-group      | RT        | 2004 | Germany     | 57.6  | 10.9   | 78    | 59  | 1. formal_DSM         | 3. phy_cancer                 | 78 | 34 |
| Smith2015      | CBT-I        | CBT       | 2015 | USA         | 59.2  | 9.9    | 50    | 38  | 1. formal_Edinger2004 | 3. phy_others                 | 50 | 18 |
| Smith2015      | BD           | PE        | 2015 | USA         | 59.6  | 9.1    | 50    | 41  | 1. formal_Edinger2004 | 3. phy_others                 | 50 | 13 |
| Smitherman2016 | CBTi         | BT        | 2016 | USA         | 29.6  | 13.4   | 16    | 15  | 1. formal_ICSD        | 3. phy_others                 | 16 | 11 |
| Smitherman2016 | Control      | PE        | 2016 | USA         | 32.1  | 12.8   | 15    | 13  | 1. formal_ICSD        | 3. phy_others                 | 16 | 9  |

| trial        | Arm          | treatment | Year | Country     | Age_m | Age_sd | Age_n | F_n | Insomnia diagnosis                  | Comorbidities               | n  | r  |
|--------------|--------------|-----------|------|-------------|-------|--------|-------|-----|-------------------------------------|-----------------------------|----|----|
| Soeffing2008 | CBTI         | BT        | 2008 | USA         | 63.5  | 8.7    | 20    | 12  | 1. formal_ICSD                      | 1. primary_secondary_mixed  | 20 | 11 |
| Soeffing2008 | Placebo      | PE        | 2008 | USA         | 64.8  | 6.5    | 27    | 18  | 1. formal_ICSD                      | 1. primary_secondary_mixed  | 27 | 10 |
| Song2020     | CBTI         | CBT       | 2020 | South Korea | 54.8  | 10.3   | 12    | 8   | 1. formal_ICSD                      | 3. phy_others               | 14 | 2  |
| Song2020     | NonCBTI      | PE        | 2020 | South Korea | 57.0  | 5.4    | 13    | 10  | 1. formal_ICSD                      | 3. phy_others               | 26 | 0  |
| Speed2022    | gCBT-I       | CBT       | 2022 | USA         | 35.1  | 10.0   | 10    | 0   | informal_other_self_reported_scales | 2. psy_substance_dependence | 10 | 4  |
| Speed2022    | SOC          | PE        | 2022 | USA         | 45.6  | 14.1   | 11    | 0   | informal_other_self_reported_scales | 2. psy_substance_dependence | 11 | 1  |
| Store2022    | Intervention | RT        | 2022 | Sweden      | 50.05 | 13.23  | 22    | 19  | 1. formal_DSM                       | 0. primary_insomnia         | 22 | 1  |
| Store2022    | Waitlist     | WL        | 2022 | Sweden      | 47.77 | 12.60  | 22    | 16  | 1. formal_DSM                       | 0. primary_insomnia         | 22 | 0  |
| Strom2004    | Treatment    | CBT       | 2004 | Sweden      | 46.2  | 11.6   | 30    | 20  | 1. formal_DSM                       | 0. primary_insomnia         | 54 | 14 |
| Strom2004    | Waitlist     | WL        | 2004 | Sweden      | 43.9  | 11.4   | 51    | 32  | 1. formal_DSM                       | 0. primary_insomnia         | 55 | 23 |
| Sunnheld2020 | BT           | BT        | 2020 | Sweden      | 51.8  | 14.5   | 73    | 51  | 1. formal_DSM                       | 1. primary_secondary_mixed  | 73 | 29 |
| Sunnheld2020 | CT           | CT        | 2020 | Sweden      | 51.5  | 12.5   | 72    | 55  | 1. formal_DSM                       | 1. primary_secondary_mixed  | 72 | 25 |
| Sunnheld2020 | WL           | WL        | 2020 | Sweden      | 54.2  | 14.6   | 74    | 54  | 1. formal_DSM                       | 1. primary_secondary_mixed  | 74 | 2  |



| trial             | Arm            | treatment | Year | Country     | Age_m | Age_sd | Age_n | F_n | Insomnia diagnosis    | Comorbidities                 | n  | r  |
|-------------------|----------------|-----------|------|-------------|-------|--------|-------|-----|-----------------------|-------------------------------|----|----|
| Sveen2021         | Intervention   | CBT       | 2021 | Sweden      | 49.9  | 5.8    | 10    | 7   | 1. formal_DSM         | 1.<br>primary_secondary_mixed | 10 | 2  |
| Sveen2021         | Control        | CT        | 2021 | Sweden      | 45.6  | 5.5    | 11    | 7   | 1. formal_DSM         | 1.<br>primary_secondary_mixed | 11 | 1  |
| Sweetman2019      | CBTi           | CBT       | 2019 | Australia   | 59.1  | 9.9    | 72    | 40  | 1. formal_ICSD        | 3. phy_others                 | 72 | 12 |
| Sweetman2019      | Control        | WL        | 2019 | Australia   | 57.3  | 9.9    | 73    | 40  | 1. formal_ICSD        | 3. phy_others                 | 73 | 2  |
| Talbot2014        | CBT-I          | CBT       | 2014 | USA         | 37.1  | 10.4   | 29    | 22  | 1. formal_Edinger2004 | 2. psy_PTSD                   | 29 | 12 |
| Talbot2014        | Waitlist       | WL        | 2014 | USA         | 37.3  | 11.0   | 16    | 9   | 1. formal_Edinger2004 | 2. psy_PTSD                   | 16 | 0  |
| Taylor2014a       | CBTi           | CBT       | 2014 | USA         | 19.5  | 1.7    | 17    | 4   | 1. formal_DSM         | 0. primary_insomnia           | 17 | 11 |
| Taylor2014a       | WLC            | WL        | 2014 | USA         | 19.9  | 2.5    | 17    | 10  | 1. formal_DSM         | 0. primary_insomnia           | 17 | 2  |
| Taylor2017        | Internet CBTi  | CBT       | 2017 | USA         | 34.5  | 8.3    | 34    | 6   | 1. formal_DSM         | 1.<br>primary_secondary_mixed | 34 | 7  |
| Taylor2017        | In-person CBTi | CBT       | 2017 | USA         | 30.8  | 6.4    | 33    | 7   | 1. formal_DSM         | 1.<br>primary_secondary_mixed | 33 | 12 |
| Taylor2017        | Control        | PE        | 2017 | USA         | 32.8  | 8.1    | 33    | 4   | 1. formal_DSM         | 1.<br>primary_secondary_mixed | 33 | 3  |
| Taylor2018        | CBTi           | CBT       | 2018 | USA         | *     | *      | *     | *   | 1. formal_DSM         | 1.<br>primary_secondary_mixed | 42 | 18 |
| Taylor2018        | Control        | PE        | 2018 | USA         | *     | *      | *     | *   | 1. formal_DSM         | 1.<br>primary_secondary_mixed | 43 | 2  |
| Ustinov2014       | Treatment      | BT        | 2013 | USA         | 53.6  | 10.8   | 36    | *   | 1. formal_DSM         | 2. psy_mixed                  | 39 | 7  |
| Ustinov2014       | Waitlist       | WL        | 2013 | USA         | 53.6  | 10.8   | 29    | *   | 1. formal_DSM         | 2. psy_mixed                  | 31 | 2  |
| VanDerZweerde2019 | i-Sleep        | CBT       | 2019 | Netherlands | 44.6  | 13.1   | 52    | 43  | 1. formal_DSM         | 2. psy_MDD                    | 52 | 28 |

| trial             | Arm               | treatment | Year | Country     | Age_m | Age_sd | Age_n | F_n | Insomnia diagnosis    | Comorbidities              | n   | r   |
|-------------------|-------------------|-----------|------|-------------|-------|--------|-------|-----|-----------------------|----------------------------|-----|-----|
| VanDerZweerde2019 | Sdiary            | WL        | 2019 | Netherlands | 46.3  | 15.1   | 52    | 42  | 1. formal_DSM         | 2. psy_MDD                 | 52  | 4   |
| VanDerZweerde2020 | i-Sleep           | CBT       | 2020 | Netherlands | 51.7  | 15.8   | 69    | 43  | 1. formal_DSM         | 1. primary_secondary_mixed | 69  | 28  |
| VanDerZweerde2020 | CAU               | WL        | 2020 | Netherlands | 49.4  | 16.0   | 65    | 44  | 1. formal_DSM         | 1. primary_secondary_mixed | 65  | 2   |
| VanStraten2014    | Intervention      | CBT       | 2014 | Netherlands | 48.7  | 13.8   | 59    | 35  | 1. formal_DSM         | 1. primary_secondary_mixed | 59  | 29  |
| VanStraten2014    | Control           | WL        | 2014 | Netherlands | 50.1  | 11.9   | 59    | 48  | 1. formal_DSM         | 1. primary_secondary_mixed | 59  | 6   |
| Vedaa2020         | dCBT-I            | CBT       | 2020 | Norway      | 44.2  | 13.9   | 868   | 596 | 2. informal_ISI       | 1. primary_secondary_mixed | 868 | 219 |
| Vedaa2020         | patient education | PE        | 2020 | Norway      | 44.8  | 13.7   | 853   | 571 | 2. informal_ISI       | 1. primary_secondary_mixed | 853 | 41  |
| Verma2022         | CBTI              | CBT       | 2022 | Australia   | 32.9  | 5.0    | 39    | 39  | 2. informal_ISI       | 3. phy_others              | 39  | 23  |
| Verma2022         | TAU               | WL        | 2022 | Australia   | 31.4  | 3.8    | 39    | 39  | 2. informal_ISI       | 3. phy_others              | 39  | 6   |
| Vincent2009       | Treatment         | CBT       | 2009 | Canada      | *     | *      | *     | 40  | 1. formal_Edinger2004 | 1. primary_secondary_mixed | 59  | 11  |
| Vincent2009       | Control           | WL        | 2009 | Canada      | *     | *      | *     | 39  | 1. formal_Edinger2004 | 1. primary_secondary_mixed | 59  | 2   |
| Vitiello2013      | CBT-PI            | BT        | 2013 | USA         | 73.2  | 8.1    | 122   | 97  | 1. formal_Edinger2004 | 3. phy_others              | 122 | 52  |
| Vitiello2013      | CBT-P             | RT        | 2013 | USA         | 73.0  | 8.4    | 122   | 98  | 1. formal_Edinger2004 | 3. phy_others              | 122 | 45  |
| Wagley2013        | Treatment         | CBT       | 2013 | USA         | 43.6  | *      | 20    | 14  | 2. informal_PSQI      | 2. psy_mixed               | 21  | 2   |
| Wagley2013        | Waitlist          | WL        | 2013 | USA         | 48.2  | *      | 10    | 7   | 2. informal_PSQI      | 2. psy_mixed               | 10  | 0   |

| trial            | Arm           | treatment | Year | Country   | Age_m | Age_sd | Age_n | F_n | Insomnia diagnosis | Comorbidities                 | n   | r  |
|------------------|---------------|-----------|------|-----------|-------|--------|-------|-----|--------------------|-------------------------------|-----|----|
| Wang2016         | BBTI          | BT        | 2016 | China     | 42.7  | 8.8    | 40    | 22  | 3. others          | 1.<br>primary_secondary_mixed | 40  | 16 |
| Wang2016         | Sleep hygiene | PE        | 2016 | China     | 39.6  | 7.8    | 39    | 21  | 3. others          | 1.<br>primary_secondary_mixed | 39  | 2  |
| Watanabe2011     | BBTI+TAU      | BT        | 2011 | Japan     | 52.9  | 11.6   | 20    | 15  | 2. informal_ISI    | 2. psy_MDD                    | 20  | 8  |
| Watanabe2011     | TAU           | PE        | 2011 | Japan     | 47.8  | 10.1   | 17    | 8   | 2. informal_ISI    | 2. psy_MDD                    | 17  | 1  |
| Watanabe2023     | CBT-I App     | CBT       | 2023 | Japan     | 42.4  | 13.5   | 87    | 55  | 1. formal_ICSD     | 0. primary_insomnia           | 87  | 33 |
| Watanabe2023     | Sham App      | PLB       | 2023 | Japan     | 45.9  | 13.2   | 88    | 47  | 1. formal_ICSD     | 0. primary_insomnia           | 88  | 9  |
| Wilkund2022      | ICBT-i        | BT        | 2022 | Sweden    | 48.2  | 11.1   | 30    | 23  | 1. formal_DSM      | 3. phy_others                 | 30  | 5  |
| Wilkund2022      | AR            | RT        | 2022 | Sweden    | 50.6  | 13.6   | 24    | 22  | 1. formal_DSM      | 3. phy_others                 | 24  | 2  |
| Woldeamanuel2021 | CCT-CI        | BT        | 2020 | USA       | 51.1  | 11.5   | 73    | 73  | 2. informal_ISI    | 3. phy_cancer                 | 73  | 19 |
| Woldeamanuel2021 | HEAL          | TAU       | 2020 | USA       | 49.7  | 10.0   | 66    | 66  | 2. informal_ISI    | 3. phy_cancer                 | 66  | 16 |
| Wong2016         | CT            | CBT       | 2016 | Australia | 49.5  | 12.5   | 31    | *   | 3. others          | 0. primary_insomnia           | 31  | 21 |
| Wong2016         | MBT           | CBT       | 2016 | Australia | 49.5  | 12.5   | 26    | *   | 3. others          | 0. primary_insomnia           | 26  | 15 |
| Wong2017         | PEEC          | BT        | 2017 | China     | 56.6  | 9.7    | 105   | 78  | 1. formal_DSM      | 0. primary_insomnia           | 105 | 5  |
| Wong2017         | MBCT-I        | CBT       | 2017 | China     | 55.6  | 9.1    | 111   | 91  | 1. formal_DSM      | 0. primary_insomnia           | 111 | 4  |
| Wong2021         | CBTI Workshop | CBT       | 2021 | China     | 38.2  | 15.8   | 70    | 46  | 1. formal_DSM      | 1.<br>primary_secondary_mixed | 70  | 12 |
| Wong2021         | Selfhelp CBTI | CBT       | 2021 | China     | 36.9  | 14.7   | 70    | 44  | 1. formal_DSM      | 1.<br>primary_secondary_mixed | 70  | 7  |
| Wong2021         | SHE           | PE        | 2021 | China     | 39.6  | 16.3   | 70    | 55  | 1. formal_DSM      | 1.<br>primary_secondary_mixed | 70  | 10 |
| Wu2006           | Combined      | CBT       | 2006 | China     | 38.0  | 12.0   | 19    | 10  | 1. formal_DSM      | 0. primary_insomnia           | 19  | 9  |

| trial           | Arm          | treatment | Year | Country     | Age_m | Age_sd | Age_n | F_n | Insomnia diagnosis | Comorbidities              | n   | r  |
|-----------------|--------------|-----------|------|-------------|-------|--------|-------|-----|--------------------|----------------------------|-----|----|
| Wu2006          | PCT          | PE        | 2006 | China       | 38.0  | 12.0   | 20    | 11  | 1. formal_DSM      | 0. primary_insomnia        | 20  | 6  |
| Xing2020        | EA/CBT       | CBT       | 2020 | China       | 54.5  | 12.1   | 31    | 25  | 1. formal_DSM      | 1. primary_secondary_mixed | 31  | 13 |
| Xing2020        | EA           | TAU       | 2020 | China       | 56.3  | 9.0    | 31    | 28  | 1. formal_DSM      | 1. primary_secondary_mixed | 31  | 5  |
| Yamamoto2016    | Intervention | BT        | 2016 | Japan       | 38.0  | 9.1    | 65    | 6   | 2. informal_AIS    | 1. primary_secondary_mixed | 65  | 48 |
| Yamamoto2016    | Control      | WL        | 2016 | Japan       | 37.5  | 8.9    | 65    | 7   | 2. informal_AIS    | 1. primary_secondary_mixed | 65  | 47 |
| Yang2022        | CBT-I        | CBT       | 2022 | South Korea | 20.50 | 3.31   | 29    | 26  | 2. informal_ISI    | 3. phy_others              | 30  | 17 |
| Yang2022        | Control      | PE        | 2022 | South Korea | 20.42 | 2.31   | 30    | 26  | 2. informal_ISI    | 3. phy_others              | 30  | 3  |
| Yang2023        | Self-help    | CBT       | 2023 | Taiwan      | 22.6  | 2.7    | 31    | 23  | 2. informal_ISI    | 0. primary_insomnia        | 31  | 2  |
| Yang2023        | Feedback     | CBT       | 2023 | Taiwan      | 22.6  | 3.0    | 31    | 22  | 2. informal_ISI    | 0. primary_insomnia        | 31  | 6  |
| Yang2023        | Waitlist     | WL        | 2023 | Taiwan      | 22.0  | 1.6    | 30    | 22  | 2. informal_ISI    | 0. primary_insomnia        | 30  | 0  |
| Zachariades2012 | Intervention | CBT       | 2012 | Canada      | 48.0  | 10.2   | 23    | 15  | 1. formal_DSM      | 3. phy_others              | 23  | 1  |
| Zachariades2012 | Control      | WL        | 2012 | Canada      | 44.3  | 9.6    | 25    | 14  | 1. formal_DSM      | 3. phy_others              | 25  | 0  |
| Zachariae2018   | Intervention | CBT       | 2018 | Denmark     | 53.2  | 8.8    | 133   | 133 | 2. informal_PSQI   | 3. phy_cancer              | 133 | 71 |
| Zachariae2018   | Control      | WL        | 2018 | Denmark     | 52.9  | 8.9    | 122   | 122 | 2. informal_PSQI   | 3. phy_cancer              | 122 | 19 |
| Zakiei2021      | Intervention | CT        | 2021 | Iran        | 41.5  | 8.7    | 17    | 10  | 1. formal_DSM      | 1. primary_secondary_mixed | 20  | 10 |
| Zakiei2021      | Control      | PLB       | 2021 | Iran        | 41.5  | 7.5    | 18    | 12  | 1. formal_DSM      | 1. primary_secondary_mixed | 20  | 1  |

| trial     | Arm               | treatment | Year | Country | Age_m | Age_sd | Age_n | F_n | Insomnia diagnosis    | Comorbidities              | n   | r  |
|-----------|-------------------|-----------|------|---------|-------|--------|-------|-----|-----------------------|----------------------------|-----|----|
| Zhang2015 | MBSR              | CT        | 2015 | China   | 78.6  | 2.9    | 30    | 14  | 1. formal_DSM         | 1. primary_secondary_mixed | 30  | 5  |
| Zhang2015 | Wait-list         | WL        | 2015 | China   | 77.6  | 3.0    | 30    | 11  | 1. formal_DSM         | 1. primary_secondary_mixed | 30  | 1  |
| Zhang2019 | MBSR              | CT        | 2019 | China   | 57.8  | 11.1   | 35    | 35  | 1. formal_Edinger2004 | 3. phy_cancer              | 35  | 10 |
| Zhang2019 | UC                | PE        | 2019 | China   | 58.5  | 11.1   | 35    | 35  | 1. formal_Edinger2004 | 3. phy_cancer              | 35  | 3  |
| Zhang2023 | DCBT-I            | CBT       | 2023 | China   | 49.6  | 13.0   | 38    | 30  | 1. formal_ICSD        | 0. primary_insomnia        | 41  | 7  |
| Zhang2023 | Sleep education   | BT        | 2023 | China   | 50.6  | 14.1   | 39    | 26  | 1. formal_ICSD        | 0. primary_insomnia        | 41  | 3  |
| Zhao2020  | MBCT-I            | CT        | 2020 | China   | 52.8  | 6.5    | 68    | 68  | 1. formal_DSM         | 3. phy_cancer              | 68  | 2  |
| Zhao2020  | Waitlist          | WL        | 2020 | China   | 53.3  | 6.5    | 68    | 68  | 1. formal_DSM         | 3. phy_cancer              | 68  | 0  |
| Zhou2022a | BWHS+SHUTi-normal | CBT       | 2022 | USA     | 59.7  | 8.2    | 218   | 218 | 2. informal_ISI       | 1. primary_secondary_mixed | 218 | 65 |
| Zhou2022a | Control           | PE        | 2022 | USA     | 59.2  | 7.7    | 115   | 115 | 2. informal_ISI       | 1. primary_secondary_mixed | 115 | 5  |
| Zhou2022b | eCBT-I            | CBT       | 2022 | China   | 31.0  | 4.4    | 60    | 59  | 1. formal_ICSD        | 1. primary_secondary_mixed | 60  | 34 |
| Zhou2022b | Control           | NT        | 2022 | China   | 29.6  | 4.5    | 68    | 57  | 1. formal_ICSD        | 1. primary_secondary_mixed | 58  | 13 |

Arm = arm name as described in the study. treatment = the treatment group name as defined in this study. Age\_m = mean age (years). Age\_sd = standard deviation of age. Age\_n = number used for calculating the mean age. F\_n = number of females. n = number randomized. r = remission (imputed, if necessary)

### eTable 3. Evaluation of components

#### 3.1. Percentage agreement and kappa of components for each arm of included trials

|                                    | Percentage agreement | Kappa |
|------------------------------------|----------------------|-------|
| <b>Educational components</b>      |                      |       |
| Sleep hygiene education (se)       | 87.8%                | 0.74  |
| Sleep diary (sd)                   | 80.3%                | 0.43  |
| <b>Cognitive components</b>        |                      |       |
| Cognitive restructuring (cr)       | 92.3%                | 0.83  |
| Third wave components (th)         | 96.5%                | 0.76  |
| Constructive worry (cw)            | 96.9%                | 0.50  |
| <b>Behavioural components</b>      |                      |       |
| Sleep restriction (sr)             | 92.7%                | 0.85  |
| Stimulus control (sc)              | 92.5%                | 0.85  |
| Paradoxical intention (pi)         | 98.8%                | 0.79  |
| Relaxation (re)                    | 89.0%                | 0.74  |
| <b>Others</b>                      |                      |       |
| Non-specific treatment effect (ns) | 84.3%                | 0.58  |
| Waiting component (w)              | 94.4%                | 0.81  |
| Conventional drug treatment (dt)   | 73.1%                | 0.45  |
| <b>Delivery methods</b>            |                      |       |
| Individual (ind)                   | 81.1%                | 0.62  |
| Group (gp)                         | 93.7%                | 0.77  |
| Face-to-face (ff)                  | 88.8%                | 0.78  |
| Therapeutic guidance (tg)          | 94.6%                | 0.70  |
| Human encouragement (he)           | 93.7%                | 0.62  |
| Automated encouragement (ae)       | 93.4%                | 0.56  |

### 3.2. Components of the included trials

| Trial         | Arm          | Treatment | Year | se | sd | cr | th | cw | sr | sc | pi | re | ns | w | dt | ind | gp | ff | tg | he | ae |
|---------------|--------------|-----------|------|----|----|----|----|----|----|----|----|----|----|---|----|-----|----|----|----|----|----|
| Abbasi2016    | Intervention | CBT       | 2016 | 1  | 0  | 1  | 0  | 0  | 1  | 0  | 0  | 1  | 1  | 0 | 1  | 1   | 1  | 1  | 0  | 0  | 0  |
| Abbasi2016    | Control      | WL        | 2016 | 0  | 0  | 0  | 0  | 0  | 0  | 0  | 0  | 0  | 0  | 1 | 1  | 1   | 1  | 1  | 0  | 0  | 0  |
| Abdelaziz2021 | Study        | CBT       | 2021 | 1  | 1  | 1  | 1  | 1  | 1  | 1  | 0  | 1  | 1  | 0 | 0  | 0   | 0  | 0  | 1  | 1  | 0  |
| Abdelaziz2021 | Control      | PE        | 2021 | 0  | 1  | 0  | 0  | 0  | 0  | 0  | 0  | 0  | 0  | 0 | 0  | 0   | 0  | 0  | 0  | 0  | 0  |
| Ahorsu2020    | CBT-I        | CBT       | 2020 | 1  | 1  | 1  | 1  | 0  | 0  | 1  | 1  | 1  | 1  | 0 | 0  | 0   | 0  | 0  | 0  | 1  | 0  |
| Ahorsu2020    | PE           | WL        | 2020 | 1  | 1  | 0  | 0  | 0  | 0  | 0  | 0  | 0  | 1  | 1 | 0  | 0   | 0  | 0  | 0  | 0  | 0  |
| Alessi2016    | Individual   | CBT       | 2016 | 1  | 1  | 1  | 0  | 0  | 1  | 1  | 0  | 0  | 1  | 0 | 1  | 1   | 0  | 1  | 0  | 0  | 0  |
| Alessi2016    | Group        | CBT       | 2016 | 1  | 1  | 1  | 0  | 0  | 1  | 1  | 0  | 0  | 1  | 0 | 1  | 0   | 1  | 1  | 0  | 0  | 0  |
| Alessi2016    | Control      | PE        | 2016 | 1  | 1  | 0  | 0  | 0  | 0  | 0  | 0  | 0  | 1  | 0 | 1  | 0   | 1  | 1  | 0  | 0  | 0  |
| Alshehri2020  | CBT-I        | CBT       | 2020 | 1  | 1  | 1  | 1  | 0  | 1  | 1  | 0  | 1  | 1  | 0 | 1  | 1   | 0  | 1  | 0  | 0  | 0  |
| Alshehri2020  | HE           | PE        | 2020 | 1  | 1  | 0  | 0  | 0  | 0  | 0  | 0  | 0  | 1  | 0 | 1  | 1   | 0  | 1  | 0  | 0  | 0  |
| Amra2022      | Intervention | CBT       | 2022 | 1  | 1  | 1  | 0  | 0  | 1  | 1  | 0  | 0  | 1  | 0 | 1  | 0   | 1  | 1  | 0  | 0  | 0  |
| Amra2022      | Control      | NT        | 2022 | 0  | 0  | 0  | 0  | 0  | 0  | 0  | 0  | 0  | 0  | 0 | 1  | 0   | 0  | 0  | 0  | 0  | 0  |
| Arnedt2011    | CBTI-AD      | CBT       | 2011 | 1  | 1  | 1  | 0  | 0  | 1  | 1  | 0  | 0  | 1  | 0 | 1  | 1   | 0  | 1  | 0  | 0  | 0  |
| Arnedt2011    | BPT          | PE        | 2011 | 1  | 1  | 0  | 0  | 0  | 0  | 0  | 0  | 0  | 1  | 0 | 1  | 1   | 0  | 1  | 0  | 0  | 0  |
| Arnedt2021    | CBT-TM       | CBT       | 2021 | 1  | 1  | 1  | 0  | 1  | 1  | 1  | 0  | 1  | 1  | 0 | 1  | 1   | 0  | 0  | 0  | 0  | 0  |
| Arnedt2021    | CBT-F2F      | CBT       | 2021 | 1  | 1  | 1  | 0  | 1  | 1  | 1  | 0  | 1  | 1  | 0 | 1  | 1   | 0  | 1  | 0  | 0  | 0  |
| Arnedt2023    | CBT-CB-TM    | CBT       | 2023 | 1  | 1  | 1  | 0  | 1  | 1  | 1  | 0  | 1  | 1  | 0 | 1  | 1   | 0  | 0  | 0  | 0  | 0  |
| Arnedt2023    | SHE-TM       | PE        | 2023 | 1  | 1  | 0  | 0  | 0  | 0  | 0  | 0  | 0  | 1  | 0 | 1  | 1   | 0  | 0  | 0  | 0  | 0  |
| Ashworth2015  | CBT-I        | CBT       | 2015 | 1  | 1  | 1  | 1  | 1  | 1  | 1  | 1  | 1  | 1  | 0 | 0  | 1   | 0  | 1  | 0  | 0  | 0  |
| Ashworth2015  | Self-help    | CBT       | 2015 | 1  | 1  | 1  | 1  | 1  | 1  | 1  | 1  | 1  | 1  | 1 | 0  | 0   | 0  | 0  | 0  | 0  | 0  |

| Trial          | Arm              | Treatment | Year | se | sd | cr | th | cw | sr | sc | pi | re | ns | w | dt | ind | gp | ff | tg | he | ae |   |
|----------------|------------------|-----------|------|----|----|----|----|----|----|----|----|----|----|---|----|-----|----|----|----|----|----|---|
| Ayabe2018      | CBT-I + TAU      | BT        | 2018 | 1  | 1  | 0  | 0  | 0  | 1  | 1  | 0  | 1  | 1  | 0 | 1  | 1   | 0  | 1  | 0  | 0  | 0  | 0 |
| Ayabe2018      | TAU              | WL        | 2018 | 1  | 1  | 0  | 0  | 0  | 0  | 0  | 0  | 0  | 1  | 1 | 1  | 1   | 0  | 1  | 0  | 0  | 0  | 0 |
| Ballou2020     | BBT              | BT        | 2020 | 1  | 1  | 0  | 0  | 0  | 1  | 1  | 0  | 0  | 1  | 0 | 1  | 1   | 0  | 1  | 0  | 0  | 0  | 0 |
| Ballou2020     | Control          | WL        | 2020 | 0  | 1  | 0  | 0  | 0  | 0  | 0  | 0  | 0  | 1  | 1 | 1  | 1   | 0  | 1  | 0  | 0  | 0  | 0 |
| Bastein2004    | Group            | CBT       | 2004 | 1  | 1  | 1  | 0  | 0  | 1  | 1  | 0  | 0  | 1  | 0 | 0  | 0   | 1  | 1  | 0  | 0  | 0  | 0 |
| Bastein2004    | Telephone        | CBT       | 2004 | 1  | 1  | 1  | 0  | 0  | 1  | 1  | 0  | 0  | 1  | 0 | 0  | 1   | 0  | 0  | 0  | 0  | 0  | 0 |
| Bastein2004    | Individual       | CBT       | 2004 | 1  | 1  | 1  | 0  | 0  | 1  | 1  | 0  | 0  | 1  | 0 | 0  | 1   | 0  | 1  | 0  | 0  | 0  | 0 |
| Behera2023     | HMBCT            | CBT       | 2023 | 1  | 1  | 0  | 1  | 0  | 1  | 1  | 0  | 0  | 1  | 0 | 0  | 1   | 0  | 1  | 0  | 0  | 0  | 0 |
| Behera2023     | Control          | BT        | 2023 | 1  | 1  | 0  | 0  | 0  | 1  | 1  | 0  | 1  | 1  | 0 | 0  | 1   | 0  | 1  | 0  | 0  | 0  | 0 |
| Bernstein2017  | Intervention     | CBT       | 2017 | 1  | 1  | 1  | 1  | 0  | 1  | 1  | 0  | 1  | 1  | 0 | 1  | 0   | 0  | 0  | 0  | 0  | 0  | 1 |
| Bernstein2017  | Control          | WL        | 2017 | 0  | 0  | 0  | 0  | 0  | 0  | 0  | 0  | 0  | 0  | 1 | 1  | 0   | 0  | 0  | 0  | 0  | 0  | 0 |
| Bothelius2013  | CBTI             | CBT       | 2013 | 1  | 1  | 1  | 0  | 0  | 1  | 1  | 1  | 1  | 1  | 0 | 1  | 1   | 1  | 0  | 0  | 0  | 0  | 0 |
| Bothelius2013  | WL               | WL        | 2013 | 0  | 1  | 0  | 0  | 0  | 0  | 0  | 0  | 0  | 0  | 1 | 1  | 0   | 0  | 0  | 0  | 0  | 0  | 0 |
| Bramoweth2020  | BBTI             | BT        | 2020 | 1  | 1  | 0  | 0  | 0  | 1  | 1  | 0  | 0  | 1  | 0 | 1  | 1   | 0  | 1  | 0  | 0  | 0  | 0 |
| Bramoweth2020  | CBTI             | CBT       | 2020 | 1  | 1  | 1  | 0  | 0  | 1  | 1  | 0  | 1  | 1  | 0 | 1  | 1   | 0  | 1  | 0  | 0  | 0  | 0 |
| Broomfield2003 | PI               | BT        | 2003 | 0  | 1  | 0  | 0  | 0  | 0  | 0  | 1  | 0  | 1  | 0 | 0  | 1   | 0  | 1  | 0  | 0  | 0  | 0 |
| Broomfield2003 | C                | PE        | 2003 | 0  | 1  | 0  | 0  | 0  | 0  | 0  | 0  | 0  | 0  | 0 | 0  | 0   | 0  | 0  | 0  | 0  | 0  | 0 |
| Buyse2011      | BBTI             | BT        | 2011 | 1  | 1  | 0  | 0  | 0  | 1  | 1  | 0  | 0  | 1  | 0 | 1  | 1   | 0  | 1  | 0  | 0  | 0  | 0 |
| Buyse2011      | IC               | WL        | 2011 | 1  | 1  | 0  | 0  | 0  | 0  | 0  | 0  | 0  | 1  | 1 | 1  | 0   | 0  | 0  | 0  | 1  | 0  | 0 |
| Cai2022        | mindfulness      | CT        | 2022 | 0  | 0  | 0  | 1  | 0  | 0  | 0  | 0  | 0  | 1  | 0 | 1  | 1   | 0  | 1  | 0  | 0  | 0  | 0 |
| Cai2022        | Health education | WL        | 2022 | 1  | 0  | 0  | 0  | 0  | 0  | 0  | 0  | 0  | 1  | 1 | 1  | 1   | 0  | 1  | 0  | 0  | 0  | 0 |
| Cape2016       | CBT-I            | CBT       | 2016 | 1  | 0  | 1  | 0  | 0  | 1  | 1  | 0  | 1  | 1  | 0 | 1  | 0   | 1  | 1  | 0  | 0  | 0  | 0 |
| Cape2016       | TAU              | PE        | 2016 | 1  | 0  | 0  | 0  | 0  | 0  | 0  | 0  | 0  | 1  | 0 | 1  | 1   | 0  | 1  | 0  | 0  | 0  | 0 |
| Carney2017     | CBT+AD           | CBT       | 2017 | 1  | 1  | 1  | 0  | 0  | 1  | 1  | 0  | 0  | 1  | 0 | 0  | 1   | 0  | 1  | 0  | 0  | 0  | 0 |
| Carney2017     | AD+SH            | PE        | 2017 | 1  | 1  | 0  | 0  | 0  | 0  | 0  | 0  | 0  | 1  | 0 | 0  | 1   | 0  | 1  | 0  | 0  | 0  | 0 |
| Carrera1980    | Ocean tape       | RT        | 1980 | 0  | 0  | 0  | 0  | 0  | 0  | 0  | 0  | 1  | 1  | 0 | 0  | 0   | 0  | 0  | 0  | 0  | 0  | 0 |



| Trial           | Arm                | Treatment | Year | se | sd | cr | th | cw | sr | sc | pi | re | ns | w | dt | ind | gp | ff | tg | he | ae |
|-----------------|--------------------|-----------|------|----|----|----|----|----|----|----|----|----|----|---|----|-----|----|----|----|----|----|
| Carrera1980     | Wait-control       | WL        | 1980 | 0  | 0  | 0  | 0  | 0  | 0  | 0  | 0  | 0  | 0  | 1 | 0  | 0   | 0  | 0  | 0  | 0  | 0  |
| Casault2015     | mCBT-I             | CBT       | 2015 | 1  | 1  | 1  | 0  | 0  | 1  | 1  | 0  | 0  | 1  | 0 | 1  | 0   | 0  | 0  | 1  | 1  | 0  |
| Casault2015     | CTL                | WL        | 2015 | 0  | 1  | 0  | 0  | 0  | 0  | 0  | 0  | 0  | 0  | 1 | 1  | 0   | 0  | 0  | 0  | 0  | 0  |
| Chakravorty2019 | CBT-I              | CBT       | 2019 | 1  | 1  | 1  | 0  | 0  | 1  | 1  | 0  | 0  | 1  | 0 | 1  | 1   | 0  | 1  | 0  | 0  | 0  |
| Chakravorty2019 | MO                 | PE        | 2019 | 0  | 1  | 0  | 0  | 0  | 0  | 0  | 0  | 0  | 1  | 0 | 1  | 1   | 0  | 1  | 0  | 0  | 0  |
| Chan2021        | Tx                 | CBT       | 2021 | 1  | 1  | 1  | 0  | 1  | 1  | 1  | 0  | 1  | 1  | 0 | 0  | 0   | 0  | 0  | 0  | 0  | 1  |
| Chan2021        | WL                 | WL        | 2021 | 0  | 0  | 0  | 0  | 0  | 0  | 0  | 0  | 0  | 0  | 1 | 0  | 0   | 0  | 0  | 0  | 0  | 0  |
| Chao2021        | CBT-I              | CBT       | 2021 | 1  | 1  | 1  | 0  | 0  | 1  | 1  | 0  | 0  | 1  | 0 | 1  | 1   | 0  | 0  | 0  | 0  | 0  |
| Chao2021        | Waitlist           | WL        | 2021 | 0  | 1  | 0  | 0  | 0  | 0  | 0  | 0  | 0  | 0  | 1 | 1  | 0   | 0  | 0  | 0  | 1  | 0  |
| Chapoutot2020   | ACT-E-CBT          | CBT       | 2020 | 1  | 1  | 1  | 1  | 0  | 1  | 1  | 0  | 1  | 1  | 0 | 1  | 1   | 0  | 0  | 0  | 0  | 0  |
| Chapoutot2020   | WLC                | WL        | 2020 | 0  | 1  | 0  | 0  | 0  | 0  | 0  | 0  | 0  | 0  | 1 | 1  | 0   | 0  | 0  | 0  | 0  | 0  |
| Cheng2019       | dCBT-I             | CBT       | 2019 | 1  | 1  | 1  | 0  | 0  | 1  | 1  | 1  | 1  | 1  | 0 | 1  | 0   | 0  | 0  | 0  | 1  | 1  |
| Cheng2019       | Sleep education    | PE        | 2019 | 1  | 0  | 0  | 0  | 0  | 0  | 0  | 0  | 0  | 1  | 0 | 1  | 0   | 0  | 0  | 0  | 0  | 0  |
| Christensen2016 | SHUTi              | CBT       | 2016 | 1  | 1  | 1  | 0  | 0  | 1  | 1  | 0  | 0  | 1  | 0 | 1  | 0   | 0  | 0  | 0  | 0  | 1  |
| Christensen2016 | HealthWatch        | PE        | 2016 | 0  | 1  | 0  | 0  | 0  | 0  | 0  | 0  | 0  | 1  | 0 | 1  | 0   | 0  | 0  | 0  | 0  | 1  |
| Chung2023       | CBTI               | CBT       | 2023 | 1  | 1  | 1  | 0  | 0  | 1  | 1  | 0  | 1  | 1  | 0 | 1  | 0   | 1  | 1  | 0  | 0  | 0  |
| Chung2023       | No CBTI            | NT        | 2023 | 0  | 0  | 0  | 0  | 0  | 0  | 0  | 0  | 0  | 0  | 0 | 1  | 0   | 0  | 0  | 0  | 0  | 0  |
| Craner2022      | IPRP-UC            | CBT       | 2022 | 1  | 0  | 0  | 1  | 0  | 0  | 0  | 0  | 1  | 1  | 1 | 1  | 1   | 0  | 1  | 0  | 0  | 0  |
| Craner2022      | IPRP+CBT-I         | CBT       | 2022 | 1  | 1  | 1  | 1  | 0  | 1  | 1  | 0  | 1  | 1  | 0 | 1  | 1   | 1  | 1  | 0  | 0  | 0  |
| Currie2000      | CBT                | CBT       | 2000 | 1  | 1  | 1  | 0  | 0  | 1  | 1  | 0  | 1  | 1  | 0 | 1  | 0   | 1  | 1  | 0  | 0  | 0  |
| Currie2000      | WLC                | WL        | 2000 | 0  | 1  | 0  | 0  | 0  | 0  | 0  | 0  | 0  | 0  | 1 | 1  | 0   | 0  | 0  | 0  | 1  | 0  |
| Currie2004      | Self-help manual   | CBT       | 2004 | 1  | 1  | 1  | 0  | 0  | 1  | 1  | 0  | 1  | 1  | 0 | 1  | 0   | 0  | 0  | 1  | 1  | 0  |
| Currie2004      | Individual therapy | CBT       | 2004 | 1  | 1  | 1  | 0  | 0  | 1  | 1  | 0  | 1  | 1  | 0 | 1  | 1   | 0  | 1  | 0  | 0  | 0  |
| Currie2004      | Wait-list          | WL        | 2004 | 0  | 1  | 0  | 0  | 0  | 0  | 0  | 0  | 0  | 0  | 1 | 1  | 0   | 0  | 0  | 0  | 0  | 0  |
| Daren2012       | Intervention       | BT        | 2012 | 1  | 1  | 0  | 0  | 0  | 1  | 1  | 0  | 0  | 1  | 0 | 1  | 1   | 0  | 1  | 0  | 0  | 0  |
| Daren2012       | Control            | PE        | 2012 | 1  | 1  | 0  | 0  | 0  | 0  | 0  | 0  | 0  | 0  | 0 | 1  | 0   | 0  | 0  | 0  | 0  | 0  |

| Trial                | Arm                 | Treatment | Year | se | sd | cr | th | cw | sr | sc | pi | re | ns | w | dt | ind | gp | ff | tg | he | ae |
|----------------------|---------------------|-----------|------|----|----|----|----|----|----|----|----|----|----|---|----|-----|----|----|----|----|----|
| Dean2019             | Experimental        | BT        | 2019 | 1  | 1  | 0  | 0  | 0  | 1  | 1  | 0  | 0  | 1  | 0 | 1  | 1   | 0  | 1  | 0  | 0  | 0  |
| Dean2019             | Control             | PE        | 2019 | 0  | 1  | 0  | 0  | 0  | 0  | 0  | 0  | 0  | 1  | 0 | 1  | 1   | 0  | 1  | 0  | 0  | 0  |
| Dekker2020           | ICBTI w 1-4         | CBT       | 2020 | 1  | 1  | 1  | 0  | 0  | 1  | 1  | 0  | 1  | 1  | 0 | 0  | 0   | 0  | 0  | 1  | 1  | 0  |
| Dekker2020           | ICBTI w 6-9         | WL        | 2020 | 0  | 1  | 0  | 0  | 0  | 0  | 0  | 0  | 0  | 1  | 1 | 0  | 0   | 0  | 0  | 0  | 0  | 0  |
| Dirksen2008          | CBT-I               | BT        | 2008 | 1  | 1  | 0  | 0  | 0  | 1  | 1  | 0  | 0  | 1  | 0 | 1  | 1   | 1  | 1  | 0  | 0  | 0  |
| Dirksen2008          | CC                  | PE        | 2008 | 1  | 1  | 0  | 0  | 0  | 0  | 0  | 0  | 0  | 1  | 0 | 1  | 1   | 1  | 1  | 0  | 0  | 0  |
| Drake2019            | SRT                 | BT        | 2019 | 0  | 1  | 0  | 0  | 0  | 1  | 0  | 0  | 0  | 1  | 0 | 0  | 1   | 0  | 1  | 0  | 0  | 0  |
| Drake2019            | CBTI                | CBT       | 2019 | 1  | 1  | 1  | 0  | 0  | 1  | 1  | 0  | 1  | 1  | 0 | 0  | 1   | 0  | 1  | 0  | 0  | 0  |
| Drake2019            | SHE                 | PE        | 2019 | 1  | 1  | 0  | 0  | 0  | 0  | 0  | 0  | 0  | 1  | 0 | 0  | 0   | 0  | 0  | 0  | 0  | 0  |
| Dyrberg2022          | CBT-I               | CBT       | 2022 | 1  | 1  | 1  | 0  | 0  | 1  | 1  | 0  | 1  | 1  | 0 | 1  | 1   | 1  | 1  | 0  | 0  | 0  |
| Dyrberg2022          | TAU                 | WL        | 2022 | 1  | 1  | 0  | 0  | 0  | 0  | 0  | 0  | 0  | 1  | 1 | 1  | 1   | 0  | 1  | 0  | 0  | 0  |
| Edinger2001          | CBT                 | CBT       | 2001 | 1  | 1  | 1  | 0  | 0  | 1  | 1  | 0  | 0  | 1  | 0 | 0  | 1   | 0  | 1  | 0  | 0  | 0  |
| Edinger2001          | Placebo therapy     | PE        | 2001 | 0  | 1  | 0  | 0  | 0  | 0  | 0  | 0  | 0  | 1  | 0 | 0  | 1   | 0  | 1  | 0  | 0  | 0  |
| Edinger2001          | Relaxation training | RT        | 2001 | 0  | 1  | 0  | 0  | 0  | 0  | 0  | 0  | 1  | 1  | 0 | 0  | 1   | 0  | 1  | 0  | 0  | 0  |
| Edinger2003          | ACBT                | BT        | 2003 | 1  | 1  | 0  | 0  | 0  | 1  | 1  | 0  | 0  | 1  | 0 | 0  | 1   | 0  | 1  | 0  | 0  | 0  |
| Edinger2003          | SHC                 | PE        | 2003 | 1  | 1  | 0  | 0  | 0  | 0  | 0  | 0  | 0  | 1  | 0 | 0  | 1   | 0  | 1  | 0  | 0  | 0  |
| Edinger2005          | CBT                 | CBT       | 2005 | 1  | 1  | 1  | 0  | 0  | 1  | 1  | 0  | 0  | 1  | 0 | 1  | 1   | 0  | 1  | 0  | 0  | 0  |
| Edinger2005          | SH                  | PE        | 2005 | 1  | 1  | 0  | 0  | 0  | 0  | 0  | 0  | 0  | 1  | 0 | 1  | 1   | 0  | 1  | 0  | 0  | 0  |
| Edinger2005          | UC                  | WL        | 2005 | 0  | 1  | 0  | 0  | 0  | 0  | 0  | 0  | 0  | 0  | 1 | 1  | 1   | 0  | 1  | 0  | 0  | 0  |
| Edinger2007          | CBT combined        | BT        | 2007 | 1  | 1  | 0  | 0  | 0  | 1  | 1  | 0  | 0  | 1  | 0 | 0  | 1   | 0  | 1  | 0  | 0  | 0  |
| Edinger2007          | WL                  | WL        | 2007 | 0  | 1  | 0  | 0  | 0  | 0  | 0  | 0  | 0  | 0  | 1 | 0  | 0   | 0  | 0  | 0  | 0  | 0  |
| Edinger2009          | CBT                 | CBT       | 2009 | 1  | 1  | 1  | 0  | 0  | 1  | 1  | 0  | 0  | 1  | 0 | 1  | 1   | 0  | 1  | 0  | 0  | 0  |
| Edinger2009          | SH                  | PE        | 2009 | 1  | 1  | 0  | 0  | 0  | 0  | 0  | 0  | 0  | 1  | 0 | 1  | 1   | 0  | 1  | 0  | 0  | 0  |
| EIRafahiFerreira2021 | ACT-BBI-I           | CBT       | 2021 | 1  | 1  | 0  | 1  | 0  | 1  | 1  | 0  | 0  | 1  | 0 | 1  | 0   | 1  | 1  | 0  | 0  | 0  |
| EIRafahiFerreira2021 | CBT-I               | CBT       | 2021 | 1  | 1  | 1  | 0  | 0  | 1  | 1  | 0  | 0  | 1  | 0 | 1  | 0   | 1  | 1  | 0  | 0  | 0  |
| EIRafahiFerreira2022 | CBT-I               | CBT       | 2022 | 1  | 1  | 1  | 0  | 0  | 1  | 1  | 0  | 0  | 1  | 0 | 1  | 0   | 1  | 1  | 0  | 0  | 0  |

| Trial                | Arm                         | Treatment | Year | se | sd | cr | th | cw | sr | sc | pi | re | ns | w | dt | ind | gp | ff | tg | he | ae |
|----------------------|-----------------------------|-----------|------|----|----|----|----|----|----|----|----|----|----|---|----|-----|----|----|----|----|----|
| EIRafahiFerreira2022 | ACT-I                       | CT        | 2022 | 1  | 1  | 0  | 1  | 0  | 0  | 0  | 0  | 0  | 1  | 0 | 1  | 0   | 1  | 1  | 0  | 0  | 0  |
| Epstein2007          | Multicomponent intervention | BT        | 2007 | 1  | 1  | 0  | 0  | 0  | 1  | 1  | 0  | 0  | 1  | 0 | 1  | 1   | 1  | 1  | 0  | 0  | 0  |
| Epstein2007          | Control                     | PE        | 2007 | 1  | 1  | 0  | 0  | 0  | 0  | 0  | 0  | 0  | 1  | 0 | 1  | 1   | 1  | 1  | 0  | 0  | 0  |
| Eptein2012           | SCT                         | BT        | 2012 | 1  | 1  | 0  | 0  | 0  | 0  | 1  | 0  | 0  | 1  | 0 | 0  | 1   | 1  | 1  | 0  | 0  | 0  |
| Eptein2012           | SRT                         | BT        | 2012 | 1  | 1  | 0  | 0  | 0  | 1  | 0  | 0  | 0  | 1  | 0 | 0  | 1   | 1  | 1  | 0  | 0  | 0  |
| Eptein2012           | MCI                         | BT        | 2012 | 1  | 1  | 0  | 0  | 0  | 1  | 1  | 0  | 0  | 1  | 0 | 0  | 1   | 1  | 1  | 0  | 0  | 0  |
| Eptein2012           | WLC                         | WL        | 2012 | 0  | 1  | 0  | 0  | 0  | 0  | 0  | 0  | 0  | 0  | 1 | 0  | 0   | 0  | 0  | 0  | 0  | 0  |
| Espie1989            | Paradoxical intention       | BT        | 1989 | 0  | 1  | 0  | 0  | 0  | 0  | 0  | 1  | 0  | 1  | 0 | 1  | 1   | 0  | 1  | 0  | 0  | 0  |
| Espie1989            | Stimulus control            | BT        | 1989 | 0  | 1  | 0  | 0  | 0  | 0  | 1  | 0  | 0  | 1  | 0 | 1  | 1   | 0  | 1  | 0  | 0  | 0  |
| Espie1989            | Placebo                     | PE        | 1989 | 0  | 1  | 0  | 0  | 0  | 0  | 0  | 0  | 0  | 1  | 0 | 1  | 1   | 0  | 1  | 0  | 0  | 0  |
| Espie1989            | Progressive relaxation      | RT        | 1989 | 0  | 1  | 0  | 0  | 0  | 0  | 0  | 0  | 1  | 1  | 0 | 1  | 1   | 0  | 1  | 0  | 0  | 0  |
| Espie1989            | No treatment                | WL        | 1989 | 0  | 1  | 0  | 0  | 0  | 0  | 0  | 0  | 0  | 1  | 1 | 1  | 1   | 0  | 1  | 0  | 0  | 0  |
| Espie2001            | CBT                         | CBT       | 2001 | 1  | 1  | 1  | 0  | 0  | 1  | 1  | 0  | 1  | 1  | 0 | 1  | 0   | 1  | 1  | 0  | 0  | 0  |
| Espie2001            | SMC                         | WL        | 2001 | 0  | 1  | 0  | 0  | 0  | 0  | 0  | 0  | 0  | 1  | 1 | 1  | 0   | 0  | 0  | 0  | 0  | 0  |
| Espie2007            | CBT                         | CBT       | 2007 | 1  | 1  | 1  | 0  | 0  | 1  | 1  | 0  | 1  | 1  | 0 | 1  | 0   | 1  | 1  | 0  | 0  | 0  |
| Espie2007            | TAU                         | PE        | 2007 | 0  | 1  | 0  | 0  | 0  | 0  | 0  | 0  | 0  | 0  | 0 | 1  | 0   | 0  | 0  | 0  | 0  | 0  |
| Espie2008            | CBT                         | CBT       | 2008 | 1  | 1  | 1  | 0  | 0  | 1  | 1  | 0  | 1  | 1  | 0 | 1  | 0   | 1  | 1  | 0  | 0  | 0  |
| Espie2008            | TAU                         | PE        | 2008 | 0  | 1  | 0  | 0  | 0  | 0  | 0  | 0  | 0  | 0  | 0 | 1  | 0   | 0  | 0  | 0  | 0  | 0  |
| Espie2012            | CBT                         | CBT       | 2012 | 1  | 1  | 1  | 1  | 0  | 1  | 1  | 1  | 1  | 1  | 0 | 1  | 0   | 0  | 0  | 0  | 1  | 1  |
| Espie2012            | IRT                         | WL        | 2012 | 1  | 1  | 0  | 0  | 0  | 0  | 0  | 0  | 0  | 1  | 1 | 1  | 0   | 0  | 0  | 0  | 0  | 1  |
| Espie2012            | TAU                         | WL        | 2012 | 0  | 1  | 0  | 0  | 0  | 0  | 0  | 0  | 0  | 0  | 1 | 1  | 0   | 0  | 0  | 0  | 0  | 1  |
| Espie2019            | dCBT                        | CBT       | 2019 | 1  | 1  | 1  | 1  | 0  | 1  | 1  | 1  | 1  | 1  | 0 | 1  | 0   | 0  | 0  | 0  | 1  | 1  |
| Espie2019            | SHE                         | PE        | 2019 | 1  | 0  | 0  | 0  | 0  | 0  | 0  | 0  | 0  | 1  | 0 | 1  | 0   | 0  | 0  | 0  | 0  | 0  |
| Falloon2015          | SSR                         | BT        | 2015 | 1  | 1  | 0  | 0  | 0  | 1  | 0  | 0  | 0  | 1  | 0 | 0  | 1   | 0  | 1  | 0  | 0  | 0  |
| Falloon2015          | Control                     | PE        | 2015 | 1  | 1  | 0  | 0  | 0  | 0  | 0  | 0  | 0  | 1  | 0 | 0  | 1   | 0  | 1  | 0  | 0  | 0  |
| Farsani2021          | CBT-I                       | CBT       | 2021 | 1  | 1  | 1  | 0  | 0  | 1  | 1  | 0  | 1  | 1  | 0 | 0  | 0   | 1  | 1  | 0  | 0  | 0  |

| Trial          | Arm                | Treatment | Year | se | sd | cr | th | cw | sr | sc | pi | re | ns | w | dt | ind | gp | ff | tg | he | ae |   |
|----------------|--------------------|-----------|------|----|----|----|----|----|----|----|----|----|----|---|----|-----|----|----|----|----|----|---|
| Farsani2021    | Control            | WL        | 2021 | 0  | 1  | 0  | 0  | 0  | 0  | 0  | 0  | 0  | 0  | 1 | 0  | 0   | 0  | 0  | 0  | 0  | 0  | 0 |
| Felder2020     | digital CBTI       | CBT       | 2020 | 1  | 1  | 1  | 0  | 0  | 1  | 1  | 0  | 1  | 1  | 0 | 1  | 0   | 0  | 0  | 0  | 1  | 1  | 1 |
| Felder2020     | Standard treatment | WL        | 2020 | 0  | 1  | 0  | 0  | 0  | 0  | 0  | 0  | 0  | 0  | 1 | 1  | 0   | 0  | 0  | 0  | 0  | 0  | 0 |
| Fernando2013   | intervention       | BT        | 2013 | 1  | 1  | 0  | 0  | 0  | 1  | 0  | 0  | 0  | 1  | 0 | 0  | 1   | 0  | 1  | 0  | 0  | 0  | 0 |
| Fernando2013   | control            | PE        | 2013 | 1  | 1  | 0  | 0  | 0  | 0  | 0  | 0  | 0  | 1  | 0 | 0  | 1   | 0  | 1  | 0  | 0  | 0  | 0 |
| Feuerstein2017 | cb-CBT-I           | CBT       | 2017 | 1  | 1  | 1  | 1  | 0  | 1  | 1  | 0  | 1  | 1  | 0 | 1  | 0   | 0  | 0  | 0  | 1  | 0  | 0 |
| Feuerstein2017 | Sleep Diary        | PE        | 2017 | 0  | 1  | 0  | 0  | 0  | 0  | 0  | 0  | 0  | 1  | 0 | 1  | 0   | 0  | 0  | 0  | 1  | 0  | 0 |
| Ford2022       | eCBT-I             | CBT       | 2022 | 1  | 1  | 1  | 1  | 0  | 1  | 1  | 0  | 1  | 1  | 0 | 1  | 1   | 0  | 1  | 1  | 1  | 1  | 0 |
| Ford2022       | TAU                | WL        | 2022 | 0  | 1  | 0  | 0  | 0  | 0  | 0  | 0  | 0  | 1  | 1 | 1  | 1   | 0  | 1  | 0  | 0  | 0  | 0 |
| Fowler2009     | CBT                | CBT       | 2009 | 1  | 1  | 1  | 0  | 1  | 1  | 1  | 0  | 0  | 1  | 0 | 1  | 0   | 0  | 0  | 1  | 1  | 0  | 0 |
| Fowler2009     | SC                 | PE        | 2009 | 0  | 1  | 0  | 0  | 0  | 0  | 0  | 0  | 0  | 0  | 0 | 1  | 0   | 0  | 0  | 0  | 0  | 0  | 0 |
| Freeman2015    | CBT                | CBT       | 2015 | 1  | 1  | 1  | 0  | 0  | 0  | 1  | 0  | 1  | 1  | 0 | 1  | 1   | 0  | 1  | 0  | 0  | 0  | 0 |
| Freeman2015    | standard care      | PE        | 2015 | 0  | 1  | 0  | 0  | 0  | 0  | 0  | 0  | 0  | 0  | 0 | 1  | 0   | 0  | 0  | 0  | 0  | 0  | 0 |
| Freeman2017    | Treatment          | CBT       | 2017 | 1  | 1  | 1  | 1  | 0  | 1  | 1  | 1  | 1  | 1  | 0 | 1  | 0   | 0  | 0  | 0  | 1  | 1  | 1 |
| Freeman2017    | Contrl             | TAU       | 2017 | 0  | 0  | 0  | 0  | 0  | 0  | 0  | 0  | 0  | 0  | 0 | 1  | 0   | 0  | 0  | 0  | 0  | 0  | 0 |
| Fucito2014     | CBT-I+SC           | CBT       | 2014 | 1  | 1  | 1  | 0  | 0  | 1  | 1  | 0  | 1  | 1  | 0 | 0  | 1   | 0  | 1  | 0  | 0  | 0  | 0 |
| Fucito2014     | SC                 | PE        | 2014 | 1  | 1  | 0  | 0  | 0  | 0  | 0  | 0  | 0  | 1  | 0 | 0  | 1   | 0  | 1  | 0  | 0  | 0  | 0 |
| Garcia2018     | Intervention       | CBT       | 2018 | 0  | 0  | 0  | 1  | 0  | 0  | 0  | 0  | 1  | 1  | 0 | 0  | 1   | 0  | 1  | 0  | 0  | 0  | 0 |
| Garcia2018     | Control            | PLB       | 2018 | 0  | 0  | 0  | 0  | 0  | 0  | 0  | 0  | 0  | 1  | 0 | 0  | 1   | 0  | 1  | 0  | 0  | 0  | 0 |
| Garland2014    | CBT-I              | CBT       | 2014 | 0  | 1  | 1  | 0  | 0  | 1  | 1  | 0  | 1  | 1  | 0 | 1  | 0   | 1  | 1  | 0  | 0  | 0  | 0 |
| Garland2014    | MBSR               | CBT       | 2014 | 0  | 1  | 0  | 1  | 0  | 0  | 0  | 0  | 1  | 1  | 0 | 1  | 0   | 1  | 1  | 0  | 0  | 0  | 0 |
| Gebara2019     | Immediate BBTI     | BT        | 2019 | 0  | 1  | 0  | 0  | 0  | 1  | 1  | 0  | 0  | 1  | 0 | 1  | 1   | 0  | 1  | 0  | 0  | 0  | 0 |
| Gebara2019     | Delayed BBTI       | WL        | 2019 | 0  | 0  | 0  | 0  | 0  | 0  | 0  | 0  | 0  | 0  | 1 | 1  | 0   | 0  | 0  | 0  | 0  | 0  | 0 |
| Gehrman2020    | In Person          | CBT       | 2020 | 1  | 1  | 1  | 0  | 0  | 1  | 1  | 0  | 1  | 1  | 0 | 1  | 0   | 1  | 1  | 0  | 0  | 0  | 0 |
| Gehrman2020    | Telehealth         | CBT       | 2020 | 1  | 1  | 1  | 0  | 0  | 1  | 1  | 0  | 1  | 1  | 0 | 1  | 0   | 1  | 0  | 0  | 0  | 0  | 0 |
| Gehrman2021    | In-person          | CBT       | 2021 | 1  | 1  | 1  | 0  | 0  | 1  | 1  | 0  | 1  | 1  | 0 | 0  | 1   | 0  | 1  | 0  | 0  | 0  | 0 |

| Trial          | Arm                 | Treatment | Year | se | sd | cr | th | cw | sr | sc | pi | re | ns | w | dt | ind | gp | ff | tg | he | ae |   |
|----------------|---------------------|-----------|------|----|----|----|----|----|----|----|----|----|----|---|----|-----|----|----|----|----|----|---|
| Gehrman2021    | Telehealth          | CBT       | 2021 | 1  | 1  | 1  | 0  | 0  | 1  | 1  | 0  | 1  | 1  | 0 | 0  | 1   | 0  | 0  | 0  | 0  | 0  | 0 |
| Gehrman2021    | Waitlist            | WL        | 2021 | 0  | 0  | 0  | 0  | 0  | 0  | 0  | 0  | 0  | 0  | 1 | 0  | 0   | 0  | 0  | 0  | 0  | 0  | 0 |
| Germain2014    | BBTI-MV             | BT        | 2014 | 1  | 1  | 0  | 0  | 0  | 1  | 1  | 0  | 0  | 1  | 0 | 1  | 1   | 0  | 1  | 0  | 0  | 0  | 0 |
| Germain2014    | Information Control | WL        | 2014 | 1  | 1  | 0  | 0  | 0  | 0  | 0  | 0  | 0  | 1  | 1 | 1  | 1   | 0  | 1  | 0  | 0  | 0  | 0 |
| Giesermann2019 | F2F                 | BT        | 2019 | 1  | 1  | 0  | 0  | 0  | 1  | 0  | 0  | 0  | 1  | 0 | 1  | 1   | 0  | 1  | 0  | 0  | 0  | 0 |
| Giesermann2019 | Chat                | BT        | 2019 | 1  | 1  | 0  | 0  | 0  | 1  | 0  | 0  | 0  | 1  | 0 | 1  | 1   | 0  | 0  | 0  | 0  | 0  | 0 |
| Giesermann2019 | WL                  | WL        | 2019 | 0  | 1  | 0  | 0  | 0  | 0  | 0  | 0  | 0  | 0  | 1 | 1  | 0   | 0  | 0  | 0  | 0  | 0  | 0 |
| Glozier2019    | SHUTi               | CBT       | 2019 | 1  | 1  | 1  | 0  | 0  | 1  | 1  | 0  | 0  | 1  | 0 | 1  | 0   | 0  | 0  | 0  | 0  | 0  | 1 |
| Glozier2019    | Control             | PE        | 2019 | 1  | 1  | 0  | 0  | 0  | 0  | 0  | 0  | 0  | 1  | 0 | 1  | 0   | 0  | 0  | 0  | 0  | 0  | 0 |
| Greeff1998     | Treatment           | RT        | 1998 | 0  | 1  | 0  | 0  | 0  | 0  | 0  | 0  | 1  | 1  | 0 | 0  | 1   | 0  | 1  | 0  | 0  | 0  | 0 |
| Greeff1998     | Control             | WL        | 1998 | 0  | 1  | 0  | 0  | 0  | 0  | 0  | 0  | 0  | 0  | 1 | 0  | 0   | 0  | 0  | 0  | 0  | 0  | 0 |
| Guarnaccia2023 | MBS-I               | CT        | 2023 | 0  | 0  | 0  | 1  | 0  | 0  | 0  | 0  | 0  | 1  | 0 | 1  | 0   | 1  | 1  | 0  | 0  | 0  | 0 |
| Guarnaccia2023 | SH                  | PE        | 2023 | 1  | 1  | 0  | 0  | 0  | 0  | 0  | 0  | 0  | 1  | 0 | 1  | 0   | 1  | 1  | 0  | 0  | 0  | 0 |
| Hagatun2019    | SHUTi               | CBT       | 2019 | 1  | 1  | 1  | 0  | 0  | 1  | 1  | 0  | 0  | 1  | 0 | 0  | 0   | 0  | 0  | 0  | 0  | 0  | 1 |
| Hagatun2019    | Patient education   | PE        | 2019 | 1  | 1  | 0  | 0  | 0  | 0  | 0  | 0  | 0  | 1  | 0 | 0  | 0   | 0  | 0  | 0  | 0  | 0  | 0 |
| Hall2022       | CBTI                | CBT       | 2022 | 1  | 1  | 1  | 0  | 1  | 1  | 1  | 0  | 1  | 1  | 0 | 1  | 1   | 0  | 1  | 0  | 0  | 0  | 0 |
| Hall2022       | EUC                 | PE        | 2022 | 1  | 1  | 0  | 0  | 0  | 0  | 0  | 0  | 0  | 1  | 0 | 1  | 0   | 0  | 0  | 0  | 0  | 0  | 0 |
| Ham2020        | Experimental        | CBT       | 2020 | 1  | 1  | 1  | 0  | 0  | 1  | 1  | 0  | 1  | 1  | 0 | 0  | 1   | 1  | 1  | 0  | 0  | 0  | 0 |
| Ham2020        | Control             | PE        | 2020 | 1  | 0  | 0  | 0  | 0  | 0  | 0  | 0  | 0  | 1  | 0 | 0  | 0   | 1  | 1  | 0  | 0  | 0  | 0 |
| Harris2012-1   | ISR+SCT             | BT        | 2012 | 1  | 1  | 0  | 0  | 0  | 0  | 1  | 0  | 0  | 1  | 0 | 0  | 1   | 0  | 1  | 0  | 0  | 0  | 0 |
| Harris2012-1   | ISR                 | PE        | 2012 | 1  | 1  | 0  | 0  | 0  | 0  | 0  | 0  | 0  | 1  | 0 | 0  | 1   | 0  | 1  | 0  | 0  | 0  | 0 |
| Harris2012-2   | SCT                 | BT        | 2012 | 1  | 1  | 0  | 0  | 0  | 0  | 1  | 0  | 0  | 1  | 0 | 0  | 1   | 0  | 1  | 0  | 0  | 0  | 0 |
| Harris2012-2   | CONTROL             | PE        | 2012 | 1  | 1  | 0  | 0  | 0  | 0  | 0  | 0  | 0  | 1  | 0 | 0  | 1   | 0  | 1  | 0  | 0  | 0  | 0 |
| Harris2019     | BI                  | BT        | 2019 | 1  | 1  | 0  | 0  | 0  | 1  | 1  | 0  | 0  | 1  | 0 | 0  | 1   | 0  | 1  | 0  | 0  | 0  | 0 |
| Harris2019     | SMC                 | PE        | 2019 | 0  | 1  | 0  | 0  | 0  | 0  | 0  | 0  | 0  | 0  | 0 | 0  | 0   | 0  | 0  | 0  | 0  | 0  | 0 |
| Harvey2014     | BT                  | BT        | 2014 | 0  | 1  | 0  | 0  | 0  | 1  | 1  | 0  | 0  | 1  | 0 | 1  | 1   | 0  | 1  | 0  | 0  | 0  | 0 |

| Trial                | Arm                     | Treatment | Year | se | sd | cr | th | cw | sr | sc | pi | re | ns | w | dt | ind | gp | ff | tg | he | ae |
|----------------------|-------------------------|-----------|------|----|----|----|----|----|----|----|----|----|----|---|----|-----|----|----|----|----|----|
| Harvey2014           | CBT                     | CBT       | 2014 | 0  | 1  | 1  | 0  | 0  | 1  | 1  | 0  | 0  | 1  | 0 | 1  | 1   | 0  | 1  | 0  | 0  | 0  |
| Harvey2014           | CT                      | CT        | 2014 | 0  | 1  | 1  | 0  | 0  | 0  | 0  | 0  | 0  | 1  | 0 | 1  | 1   | 0  | 1  | 0  | 0  | 0  |
| Harvey2015           | CBTI-BP                 | CBT       | 2015 | 1  | 1  | 1  | 0  | 0  | 1  | 1  | 0  | 0  | 1  | 0 | 1  | 1   | 0  | 1  | 0  | 0  | 0  |
| Harvey2015           | PE                      | RT        | 2015 | 0  | 1  | 0  | 0  | 0  | 0  | 0  | 0  | 1  | 1  | 0 | 1  | 1   | 0  | 1  | 0  | 0  | 0  |
| Ho2014               | SHS                     | CBT       | 2014 | 1  | 1  | 1  | 0  | 0  | 1  | 1  | 0  | 1  | 1  | 0 | 1  | 1   | 0  | 0  | 1  | 1  | 0  |
| Ho2014               | SH                      | CBT       | 2014 | 1  | 1  | 1  | 0  | 0  | 1  | 1  | 0  | 1  | 1  | 0 | 1  | 0   | 0  | 0  | 0  | 0  | 0  |
| Ho2014               | WL                      | WL        | 2014 | 0  | 1  | 0  | 0  | 0  | 0  | 0  | 0  | 0  | 0  | 1 | 1  | 0   | 0  | 0  | 0  | 0  | 0  |
| Ho2021               | CBT                     | CBT       | 2021 | 1  | 1  | 1  | 0  | 1  | 1  | 1  | 0  | 1  | 1  | 0 | 0  | 0   | 1  | 1  | 0  | 0  | 0  |
| Ho2021               | WL                      | WL        | 2021 | 0  | 0  | 0  | 0  | 0  | 0  | 0  | 0  | 0  | 0  | 1 | 0  | 0   | 0  | 0  | 0  | 0  | 0  |
| Holmqvist2014        | Telehealth-based        | CBT       | 2014 | 1  | 1  | 1  | 1  | 0  | 1  | 1  | 0  | 1  | 1  | 0 | 0  | 0   | 1  | 0  | 0  | 0  | 0  |
| Holmqvist2014        | Web-based               | CBT       | 2014 | 1  | 1  | 1  | 1  | 0  | 1  | 1  | 0  | 1  | 1  | 0 | 0  | 0   | 0  | 0  | 0  | 0  | 0  |
| Horsch2017           | App                     | BT        | 2017 | 1  | 1  | 0  | 0  | 0  | 1  | 1  | 0  | 1  | 1  | 0 | 1  | 0   | 0  | 0  | 0  | 0  | 1  |
| Horsch2017           | WI                      | WL        | 2017 | 0  | 1  | 0  | 0  | 0  | 0  | 0  | 0  | 0  | 0  | 1 | 1  | 0   | 0  | 0  | 0  | 0  | 0  |
| Hou2014              | Treatment               | BT        | 2014 | 0  | 0  | 0  | 0  | 0  | 1  | 1  | 0  | 1  | 1  | 0 | 1  | 0   | 1  | 1  | 0  | 0  | 0  |
| Hou2014              | Control                 | NT        | 2014 | 0  | 0  | 0  | 0  | 0  | 0  | 0  | 0  | 0  | 0  | 0 | 1  | 0   | 0  | 0  | 0  | 0  | 0  |
| Jacobs1993           | SC                      | BT        | 1993 | 0  | 1  | 0  | 0  | 0  | 0  | 1  | 0  | 0  | 1  | 0 | 0  | 1   | 0  | 1  | 0  | 0  | 0  |
| Jacobs1993           | MF                      | BT        | 1993 | 0  | 1  | 0  | 0  | 0  | 0  | 1  | 0  | 1  | 1  | 0 | 0  | 1   | 0  | 1  | 0  | 0  | 0  |
| Jacobs2004           | Combination             | CBT       | 2004 | 1  | 1  | 1  | 0  | 0  | 1  | 1  | 0  | 1  | 1  | 0 | 1  | 1   | 0  | 1  | 0  | 0  | 0  |
| Jacobs2004           | Pharmacotherapy         | PE        | 2004 | 1  | 1  | 0  | 0  | 0  | 0  | 0  | 0  | 0  | 1  | 0 | 1  | 1   | 0  | 1  | 0  | 0  | 0  |
| JanssonFrojmark2012a | BT                      | BT        | 2012 | 0  | 1  | 0  | 0  | 0  | 1  | 1  | 0  | 0  | 1  | 0 | 1  | 1   | 0  | 1  | 0  | 0  | 0  |
| JanssonFrojmark2012a | BT+CW                   | CBT       | 2012 | 0  | 1  | 0  | 0  | 1  | 1  | 1  | 0  | 0  | 1  | 0 | 1  | 1   | 0  | 1  | 0  | 0  | 0  |
| JanssonFrojmark2012b | CBT-I                   | CBT       | 2012 | 1  | 1  | 1  | 0  | 1  | 1  | 1  | 0  | 1  | 1  | 0 | 0  | 1   | 0  | 1  | 0  | 0  | 0  |
| JanssonFrojmark2012b | WLC                     | WL        | 2012 | 0  | 1  | 0  | 0  | 0  | 0  | 0  | 0  | 0  | 0  | 1 | 0  | 0   | 0  | 0  | 0  | 0  | 0  |
| Jarnefelt2020        | Group-based CBT-I       | CBT       | 2020 | 1  | 1  | 1  | 1  | 1  | 1  | 1  | 0  | 1  | 1  | 0 | 1  | 0   | 1  | 1  | 0  | 0  | 0  |
| Jarnefelt2020        | Self-help-based CBT-I   | CBT       | 2020 | 1  | 1  | 1  | 1  | 1  | 1  | 1  | 0  | 1  | 1  | 0 | 1  | 0   | 0  | 0  | 1  | 0  | 0  |
| Jarnefelt2020        | Sleep hygiene education | PE        | 2020 | 1  | 1  | 0  | 0  | 0  | 0  | 0  | 0  | 0  | 1  | 0 | 1  | 0   | 0  | 0  | 0  | 0  | 0  |

| Trial         | Arm                        | Treatment | Year | se | sd | cr | th | cw | sr | sc | pi | re | ns | w | dt | ind | gp | ff | tg | he | ae |   |
|---------------|----------------------------|-----------|------|----|----|----|----|----|----|----|----|----|----|---|----|-----|----|----|----|----|----|---|
| Javaheri2020  | Intervention               | CBT       | 2020 | 1  | 1  | 1  | 0  | 0  | 1  | 1  | 0  | 1  | 1  | 0 | 1  | 0   | 0  | 0  | 0  | 0  | 0  | 1 |
| Javaheri2020  | Control                    | PE        | 2020 | 0  | 1  | 0  | 0  | 0  | 0  | 0  | 0  | 0  | 1  | 0 | 1  | 0   | 0  | 0  | 0  | 0  | 0  | 0 |
| Jernelov2012  | Bibliotherapy with support | CBT       | 2012 | 1  | 1  | 1  | 0  | 0  | 1  | 1  | 0  | 1  | 1  | 0 | 1  | 0   | 0  | 0  | 1  | 1  | 0  | 0 |
| Jernelov2012  | Bibliotherapy              | CBT       | 2012 | 1  | 1  | 1  | 0  | 0  | 1  | 1  | 0  | 1  | 1  | 0 | 1  | 0   | 0  | 0  | 0  | 0  | 0  | 0 |
| Jernelov2012  | Wait list                  | WL        | 2012 | 0  | 1  | 0  | 0  | 0  | 0  | 0  | 0  | 0  | 0  | 1 | 1  | 0   | 0  | 0  | 0  | 0  | 0  | 0 |
| Johann2020    | Treatment                  | CBT       | 2020 | 1  | 1  | 1  | 0  | 1  | 1  | 1  | 1  | 1  | 1  | 0 | 0  | 1   | 0  | 1  | 0  | 0  | 0  | 0 |
| Johann2020    | Control                    | WL        | 2020 | 0  | 1  | 0  | 0  | 0  | 0  | 0  | 0  | 0  | 0  | 1 | 0  | 0   | 0  | 0  | 0  | 0  | 0  | 0 |
| Jungquist2010 | Treatment                  | CBT       | 2010 | 1  | 1  | 1  | 0  | 0  | 1  | 1  | 0  | 0  | 1  | 0 | 0  | 1   | 0  | 1  | 0  | 0  | 0  | 0 |
| Jungquist2010 | Control                    | PE        | 2010 | 0  | 1  | 0  | 0  | 0  | 0  | 0  | 0  | 0  | 1  | 0 | 0  | 1   | 0  | 1  | 0  | 0  | 0  | 0 |
| Kaku2012      | Intervention               | BT        | 2012 | 1  | 0  | 0  | 0  | 0  | 1  | 1  | 0  | 1  | 1  | 0 | 0  | 1   | 0  | 1  | 0  | 0  | 0  | 0 |
| Kaku2012      | Control                    | WL        | 2012 | 0  | 0  | 0  | 0  | 0  | 0  | 0  | 0  | 0  | 0  | 1 | 0  | 0   | 0  | 0  | 0  | 0  | 0  | 0 |
| Kaldo2015     | Control                    | CBT       | 2015 | 1  | 1  | 0  | 1  | 0  | 0  | 0  | 0  | 1  | 1  | 0 | 1  | 0   | 0  | 0  | 0  | 0  | 0  | 1 |
| Kaldo2015     | Treatment                  | CBT       | 2015 | 1  | 1  | 1  | 0  | 0  | 1  | 1  | 0  | 0  | 1  | 0 | 1  | 0   | 0  | 0  | 1  | 0  | 1  | 1 |
| Kaldo2020     | Selfhelp book-group        | CBT       | 2020 | 1  | 1  | 1  | 1  | 0  | 1  | 1  | 0  | 1  | 1  | 0 | 1  | 0   | 1  | 1  | 1  | 1  | 1  | 0 |
| Kaldo2020     | CAU                        | WL        | 2020 | 0  | 1  | 0  | 0  | 0  | 0  | 0  | 0  | 0  | 0  | 1 | 1  | 0   | 0  | 0  | 0  | 0  | 0  | 0 |
| Kallestad2021 | FtF CBT-I                  | CBT       | 2021 | 1  | 1  | 1  | 0  | 0  | 1  | 1  | 0  | 0  | 1  | 0 | 1  | 1   | 0  | 1  | 0  | 0  | 0  | 0 |
| Kallestad2021 | dCBT-I                     | CBT       | 2021 | 1  | 1  | 1  | 0  | 0  | 1  | 1  | 0  | 0  | 1  | 0 | 1  | 0   | 0  | 0  | 0  | 0  | 0  | 0 |
| Kalmbach2020  | CBT-I                      | CBT       | 2020 | 1  | 0  | 1  | 0  | 0  | 1  | 1  | 1  | 1  | 1  | 0 | 0  | 0   | 0  | 0  | 0  | 0  | 0  | 0 |
| Kalmbach2020  | Control                    | PE        | 2020 | 1  | 0  | 0  | 0  | 0  | 0  | 0  | 0  | 0  | 1  | 0 | 0  | 0   | 0  | 0  | 0  | 0  | 0  | 1 |
| Kapella2011   | CBT-I                      | CBT       | 2011 | 1  | 1  | 1  | 0  | 0  | 1  | 1  | 0  | 1  | 1  | 0 | 0  | 1   | 0  | 1  | 0  | 0  | 0  | 0 |
| Kapella2011   | WE                         | PE        | 2011 | 0  | 1  | 0  | 0  | 0  | 0  | 0  | 0  | 0  | 1  | 0 | 0  | 1   | 0  | 1  | 0  | 0  | 0  | 0 |
| Kapella2022   | CBT-I+AC or COPD-ED        | CBT       | 2022 | 1  | 1  | 1  | 0  | 0  | 1  | 1  | 0  | 1  | 1  | 0 | 0  | 1   | 0  | 1  | 0  | 0  | 0  | 0 |
| Kapella2022   | AC+AC or COPD-ED           | PE        | 2022 | 0  | 1  | 0  | 0  | 0  | 0  | 0  | 0  | 0  | 1  | 0 | 0  | 1   | 0  | 1  | 0  | 0  | 0  | 0 |
| Kennet2021    | Intervention               | CBT       | 2021 | 1  | 0  | 1  | 1  | 0  | 1  | 1  | 0  | 1  | 1  | 0 | 0  | 0   | 0  | 0  | 0  | 0  | 0  | 1 |
| Kennet2021    | Waitlist                   | WL        | 2021 | 0  | 0  | 0  | 0  | 0  | 0  | 0  | 0  | 0  | 0  | 1 | 0  | 0   | 0  | 0  | 0  | 0  | 0  | 0 |
| Krieger2019   | SRT                        | BT        | 2019 | 1  | 1  | 0  | 0  | 0  | 1  | 0  | 0  | 0  | 1  | 0 | 1  | 0   | 0  | 0  | 1  | 1  | 0  | 0 |

| Trial           | Arm            | Treatment | Year | se | sd | cr | th | cw | sr | sc | pi | re | ns | w | dt | ind | gp | ff | tg | he | ae |
|-----------------|----------------|-----------|------|----|----|----|----|----|----|----|----|----|----|---|----|-----|----|----|----|----|----|
| Krieger2019     | MCT            | CBT       | 2019 | 1  | 1  | 1  | 0  | 0  | 1  | 0  | 0  | 1  | 1  | 0 | 1  | 0   | 0  | 0  | 1  | 1  | 0  |
| Krieger2019     | CAU            | WL        | 2019 | 0  | 0  | 0  | 0  | 0  | 0  | 0  | 0  | 0  | 0  | 1 | 1  | 0   | 0  | 0  | 0  | 0  | 0  |
| Kuhn2022        | Insomnia Coach | CBT       | 2022 | 1  | 1  | 1  | 0  | 0  | 1  | 1  | 0  | 1  | 1  | 0 | 1  | 0   | 0  | 0  | 0  | 0  | 0  |
| Kuhn2022        | Wait-list      | WL        | 2022 | 0  | 1  | 0  | 0  | 0  | 0  | 0  | 0  | 0  | 0  | 1 | 1  | 0   | 0  | 0  | 0  | 0  | 0  |
| Kyle2020        | dCBT           | CBT       | 2020 | 1  | 1  | 1  | 1  | 0  | 1  | 1  | 1  | 1  | 1  | 0 | 1  | 0   | 0  | 0  | 0  | 0  | 1  |
| Kyle2020        | WLC            | WL        | 2020 | 0  | 0  | 0  | 0  | 0  | 0  | 0  | 0  | 0  | 0  | 1 | 1  | 0   | 0  | 0  | 0  | 0  | 0  |
| Lami2018        | CBT-IP         | CBT       | 2018 | 1  | 0  | 1  | 0  | 0  | 1  | 1  | 0  | 1  | 1  | 0 | 1  | 0   | 1  | 1  | 0  | 0  | 0  |
| Lami2018        | CBT-P          | PLB       | 2018 | 0  | 0  | 0  | 0  | 0  | 0  | 0  | 0  | 0  | 1  | 0 | 1  | 0   | 1  | 1  | 0  | 0  | 0  |
| Lancee2012      | Electronic+Pen | CBT       | 2012 | 1  | 1  | 1  | 0  | 0  | 1  | 1  | 1  | 1  | 1  | 0 | 1  | 0   | 0  | 0  | 0  | 0  | 0  |
| Lancee2012      | Waitlist       | WL        | 2012 | 0  | 1  | 0  | 0  | 0  | 0  | 0  | 0  | 0  | 0  | 1 | 1  | 0   | 0  | 0  | 0  | 0  | 0  |
| Lancee2013      | No support     | CBT       | 2013 | 1  | 1  | 1  | 0  | 0  | 1  | 1  | 1  | 1  | 1  | 0 | 1  | 0   | 0  | 0  | 0  | 0  | 0  |
| Lancee2013      | Support        | CBT       | 2013 | 1  | 1  | 1  | 0  | 0  | 1  | 1  | 1  | 1  | 1  | 0 | 1  | 0   | 0  | 0  | 1  | 1  | 0  |
| Lancee2015      | CBT-I          | CBT       | 2015 | 1  | 1  | 1  | 0  | 0  | 1  | 1  | 0  | 1  | 1  | 0 | 1  | 0   | 0  | 0  | 1  | 1  | 0  |
| Lancee2015      | Wait-list      | WL        | 2015 | 0  | 1  | 0  | 0  | 0  | 0  | 0  | 0  | 0  | 0  | 1 | 1  | 0   | 0  | 0  | 0  | 0  | 0  |
| Lancee2016      | f2f            | CBT       | 2016 | 1  | 1  | 1  | 0  | 0  | 1  | 1  | 0  | 1  | 1  | 0 | 1  | 1   | 0  | 1  | 0  | 0  | 0  |
| Lancee2016      | Online         | CBT       | 2016 | 1  | 1  | 1  | 0  | 0  | 1  | 1  | 0  | 1  | 1  | 0 | 1  | 0   | 0  | 0  | 1  | 0  | 0  |
| Lancee2016      | WL             | WL        | 2016 | 0  | 1  | 0  | 0  | 0  | 0  | 0  | 0  | 0  | 0  | 1 | 1  | 0   | 0  | 0  | 0  | 0  | 0  |
| Lappalainen2019 | iACT           | CBT       | 2019 | 1  | 1  | 0  | 1  | 0  | 0  | 1  | 0  | 0  | 1  | 0 | 1  | 0   | 0  | 0  | 0  | 0  | 1  |
| Lappalainen2019 | WLC            | WL        | 2019 | 0  | 1  | 0  | 0  | 0  | 0  | 0  | 0  | 0  | 0  | 1 | 1  | 0   | 0  | 0  | 0  | 0  | 0  |
| Latocha2022     | CBTI           | BT        | 2022 | 1  | 1  | 0  | 0  | 0  | 1  | 1  | 0  | 1  | 1  | 0 | 0  | 0   | 1  | 1  | 0  | 0  | 0  |
| Latocha2022     | UC             | PE        | 2022 | 0  | 1  | 0  | 0  | 0  | 0  | 0  | 0  | 0  | 0  | 0 | 0  | 0   | 0  | 0  | 0  | 0  | 0  |
| Leerssen2022-1  | CBT-I          | CBT       | 2022 | 1  | 1  | 1  | 0  | 0  | 1  | 1  | 0  | 1  | 1  | 0 | 1  | 0   | 0  | 0  | 1  | 1  | 0  |
| Leerssen2022-1  | NT             | PE        | 2022 | 0  | 1  | 0  | 0  | 0  | 0  | 0  | 0  | 0  | 0  | 0 | 1  | 0   | 0  | 0  | 0  | 0  | 0  |
| Leerssen2022-2  | CBT-I+CRS      | CBT       | 2022 | 1  | 1  | 1  | 0  | 0  | 1  | 1  | 0  | 1  | 1  | 0 | 1  | 0   | 0  | 0  | 1  | 1  | 0  |
| Leerssen2022-2  | CRS            | PE        | 2022 | 0  | 1  | 0  | 0  | 0  | 0  | 0  | 0  | 0  | 1  | 0 | 1  | 0   | 0  | 0  | 1  | 1  | 0  |
| Lichstein2000   | Treatment      | BT        | 2000 | 1  | 1  | 0  | 0  | 0  | 0  | 1  | 0  | 1  | 1  | 0 | 0  | 1   | 0  | 1  | 0  | 0  | 0  |



| Trial         | Arm                | Treatment | Year | se | sd | cr | th | cw | sr | sc | pi | re | ns | w | dt | ind | gp | ff | tg | he | ae |
|---------------|--------------------|-----------|------|----|----|----|----|----|----|----|----|----|----|---|----|-----|----|----|----|----|----|
| Lichstein2000 | Control            | WL        | 2000 | 0  | 1  | 0  | 0  | 0  | 0  | 0  | 0  | 0  | 0  | 1 | 0  | 0   | 0  | 0  | 0  | 0  | 0  |
| Lichstein2001 | Placebo            | PE        | 2001 | 1  | 1  | 0  | 0  | 0  | 0  | 0  | 0  | 0  | 1  | 0 | 0  | 1   | 0  | 1  | 0  | 0  | 0  |
| Lichstein2001 | Relaxation         | RT        | 2001 | 1  | 1  | 0  | 0  | 0  | 0  | 0  | 0  | 1  | 1  | 0 | 0  | 1   | 0  | 1  | 0  | 0  | 0  |
| Liu2022-1     | Control            | NT        | 2022 | 0  | 0  | 0  | 0  | 0  | 0  | 0  | 0  | 0  | 0  | 0 | 0  | 0   | 0  | 0  | 0  | 0  | 0  |
| Liu2022-1     | MBSR               | CT        | 2022 | 0  | 0  | 0  | 1  | 0  | 0  | 0  | 0  | 0  | 1  | 0 | 0  | 0   | 1  | 1  | 0  | 0  | 0  |
| Liu2022-2     | Acupressure        | PLB       | 2022 | 0  | 0  | 0  | 0  | 0  | 0  | 0  | 0  | 0  | 1  | 0 | 0  | 0   | 0  | 0  | 0  | 0  | 0  |
| Liu2022-2     | MBSR + Acupressure | CT        | 2022 | 0  | 0  | 0  | 1  | 0  | 0  | 0  | 0  | 0  | 1  | 0 | 0  | 0   | 1  | 1  | 0  | 0  | 0  |
| Lopez2019     | eCBT-I             | CBT       | 2019 | 1  | 1  | 1  | 1  | 0  | 1  | 1  | 0  | 1  | 1  | 0 | 1  | 1   | 0  | 0  | 0  | 0  | 0  |
| Lopez2019     | mPT                | PE        | 2019 | 1  | 1  | 0  | 0  | 0  | 0  | 0  | 0  | 0  | 1  | 0 | 1  | 1   | 0  | 1  | 0  | 0  | 0  |
| Lorenz2019    | Treatment          | CBT       | 2019 | 1  | 1  | 1  | 0  | 0  | 1  | 1  | 0  | 1  | 1  | 0 | 1  | 0   | 0  | 0  | 0  | 0  | 1  |
| Lorenz2019    | Control            | WL        | 2019 | 0  | 0  | 0  | 0  | 0  | 0  | 0  | 0  | 0  | 0  | 1 | 1  | 0   | 0  | 0  | 0  | 0  | 0  |
| Lovato2014    | CBT-I              | CBT       | 2014 | 1  | 1  | 1  | 0  | 0  | 1  | 0  | 0  | 0  | 1  | 0 | 0  | 0   | 1  | 1  | 0  | 0  | 0  |
| Lovato2014    | Waitlist           | WL        | 2014 | 0  | 1  | 0  | 0  | 0  | 0  | 0  | 0  | 0  | 0  | 1 | 0  | 0   | 0  | 0  | 0  | 0  | 0  |
| Low2020       | Mindfulness        | CT        | 2020 | 0  | 1  | 0  | 1  | 0  | 0  | 0  | 0  | 0  | 1  | 0 | 1  | 0   | 0  | 0  | 0  | 0  | 0  |
| Low2020       | PMR                | RT        | 2020 | 0  | 1  | 0  | 0  | 0  | 0  | 0  | 0  | 1  | 1  | 0 | 1  | 0   | 0  | 0  | 0  | 0  | 0  |
| Maguen2021    | BBTI               | BT        | 2021 | 1  | 1  | 0  | 0  | 0  | 1  | 1  | 0  | 0  | 1  | 0 | 1  | 1   | 0  | 1  | 0  | 0  | 0  |
| Maguen2021    | PMRT               | RT        | 2021 | 0  | 1  | 0  | 0  | 0  | 0  | 0  | 0  | 1  | 1  | 0 | 1  | 1   | 0  | 1  | 0  | 0  | 0  |
| Majd2020      | CBTI               | CBT       | 2020 | 1  | 1  | 1  | 1  | 0  | 1  | 0  | 1  | 1  | 1  | 0 | 0  | 0   | 0  | 0  | 0  | 0  | 1  |
| Majd2020      | PE                 | PE        | 2020 | 1  | 0  | 0  | 0  | 0  | 0  | 0  | 0  | 0  | 1  | 0 | 0  | 0   | 0  | 0  | 0  | 0  | 1  |
| Manber2008    | EsCIT+CBTI         | CBT       | 2008 | 1  | 1  | 1  | 0  | 0  | 1  | 1  | 0  | 1  | 1  | 0 | 0  | 1   | 0  | 1  | 0  | 0  | 0  |
| Manber2008    | EsCIT+CTRL         | PE        | 2008 | 1  | 1  | 0  | 0  | 0  | 0  | 0  | 0  | 0  | 1  | 0 | 0  | 1   | 0  | 1  | 0  | 0  | 0  |
| Manber2016    | CBTI               | CBT       | 2016 | 1  | 0  | 1  | 0  | 0  | 1  | 1  | 0  | 1  | 1  | 0 | 0  | 1   | 0  | 1  | 0  | 0  | 0  |
| Manber2016    | CTRL               | PE        | 2016 | 1  | 0  | 0  | 0  | 0  | 0  | 0  | 0  | 0  | 1  | 0 | 0  | 1   | 0  | 1  | 0  | 0  | 0  |
| Manber2019    | CBTI               | CBT       | 2019 | 1  | 1  | 1  | 0  | 0  | 1  | 1  | 0  | 1  | 1  | 0 | 0  | 1   | 0  | 1  | 0  | 0  | 0  |
| Manber2019    | CTRL               | PE        | 2019 | 1  | 1  | 0  | 0  | 0  | 0  | 0  | 0  | 0  | 1  | 0 | 0  | 1   | 0  | 1  | 0  | 0  | 0  |
| Mao2018       | Intervention       | CBT       | 2018 | 1  | 1  | 1  | 0  | 0  | 1  | 1  | 0  | 1  | 1  | 0 | 1  | 0   | 1  | 1  | 0  | 0  | 0  |

| Trial        | Arm                                      | Treatment | Year | se | sd | cr | th | cw | sr | sc | pi | re | ns | w | dt | ind | gp | ff | tg | he | ae |
|--------------|------------------------------------------|-----------|------|----|----|----|----|----|----|----|----|----|----|---|----|-----|----|----|----|----|----|
| Mao2018      | Control                                  | PE        | 2018 | 1  | 1  | 0  | 0  | 0  | 0  | 0  | 0  | 0  | 1  | 0 | 1  | 0   | 1  | 1  | 0  | 0  | 0  |
| Marino2001   | CBTI                                     | CBT       | 2001 | 1  | 1  | 1  | 0  | 0  | 1  | 1  | 0  | 1  | 1  | 0 | 0  | 0   | 1  | 1  | 0  | 0  | 0  |
| Marino2001   | WL                                       | WL        | 2001 | 0  | 1  | 0  | 0  | 0  | 0  | 0  | 0  | 0  | 0  | 1 | 0  | 0   | 0  | 0  | 0  | 0  | 0  |
| Marks2023    | CBTI                                     | CBT       | 2023 | 1  | 1  | 1  | 0  | 0  | 1  | 1  | 1  | 1  | 1  | 0 | 1  | 0   | 1  | 1  | 0  | 0  | 0  |
| Marks2023    | ABC                                      | RT        | 2023 | 1  | 1  | 0  | 0  | 0  | 0  | 0  | 0  | 1  | 1  | 0 | 1  | 0   | 1  | 1  | 0  | 0  | 0  |
| Marks2023    | SSG                                      | PE        | 2023 | 0  | 1  | 0  | 0  | 0  | 0  | 0  | 0  | 0  | 1  | 0 | 1  | 0   | 1  | 1  | 0  | 0  | 0  |
| Martinez2014 | CBT-I                                    | CBT       | 2014 | 1  | 1  | 1  | 0  | 0  | 1  | 1  | 0  | 1  | 1  | 0 | 1  | 1   | 0  | 1  | 0  | 0  | 0  |
| Martinez2014 | SH                                       | WL        | 2014 | 1  | 1  | 0  | 0  | 0  | 0  | 0  | 0  | 0  | 1  | 1 | 1  | 1   | 0  | 1  | 0  | 0  | 0  |
| Matthews2014 | CBTI                                     | CBT       | 2014 | 1  | 1  | 1  | 0  | 0  | 1  | 1  | 0  | 0  | 1  | 0 | 1  | 1   | 0  | 1  | 0  | 0  | 0  |
| Matthews2014 | BPT                                      | PE        | 2014 | 0  | 1  | 0  | 0  | 0  | 0  | 0  | 0  | 0  | 1  | 0 | 1  | 1   | 0  | 1  | 0  | 0  | 0  |
| McCrae2007   | MBT                                      | BT        | 2007 | 0  | 1  | 0  | 0  | 0  | 1  | 1  | 0  | 1  | 1  | 0 | 0  | 1   | 0  | 1  | 0  | 0  | 0  |
| McCrae2007   | SHE                                      | PE        | 2007 | 1  | 1  | 0  | 0  | 0  | 0  | 0  | 0  | 0  | 1  | 0 | 0  | 1   | 0  | 1  | 0  | 0  | 0  |
| McCrae2019   | CBT-I                                    | CBT       | 2019 | 1  | 1  | 1  | 0  | 0  | 1  | 1  | 0  | 1  | 1  | 0 | 1  | 1   | 0  | 1  | 0  | 0  | 0  |
| McCrae2019   | WLC                                      | WL        | 2019 | 0  | 1  | 0  | 0  | 0  | 0  | 0  | 0  | 0  | 0  | 1 | 1  | 0   | 0  | 0  | 0  | 0  | 0  |
| McCrae2020   | BBTi                                     | BT        | 2020 | 1  | 1  | 0  | 0  | 0  | 1  | 1  | 0  | 1  | 1  | 0 | 1  | 1   | 0  | 1  | 0  | 0  | 0  |
| McCrae2020   | SMC                                      | PE        | 2020 | 0  | 1  | 0  | 0  | 0  | 0  | 0  | 0  | 0  | 1  | 0 | 1  | 1   | 0  | 1  | 0  | 0  | 0  |
| McCurry2016  | CBT-I                                    | CBT       | 2016 | 1  | 1  | 1  | 0  | 1  | 1  | 1  | 0  | 0  | 1  | 0 | 0  | 1   | 0  | 0  | 0  | 0  | 0  |
| McCurry2016  | MEC                                      | PE        | 2016 | 1  | 1  | 0  | 0  | 0  | 0  | 0  | 0  | 0  | 1  | 0 | 0  | 1   | 0  | 0  | 0  | 0  | 0  |
| McCurry2021  | CBT-I                                    | CBT       | 2021 | 1  | 1  | 1  | 1  | 1  | 1  | 1  | 0  | 0  | 1  | 0 | 1  | 1   | 0  | 0  | 0  | 0  | 0  |
| McCurry2021  | EOC                                      | PE        | 2021 | 1  | 1  | 0  | 0  | 0  | 0  | 0  | 0  | 0  | 1  | 0 | 1  | 1   | 0  | 0  | 0  | 0  | 0  |
| Means2000    | Treated SWI                              | RT        | 2000 | 0  | 1  | 0  | 0  | 0  | 0  | 0  | 0  | 1  | 1  | 0 | 0  | 1   | 0  | 1  | 0  | 0  | 0  |
| Means2000    | Untreated SWI                            | WL        | 2000 | 0  | 1  | 0  | 0  | 0  | 0  | 0  | 0  | 0  | 0  | 1 | 0  | 0   | 0  | 0  | 0  | 0  | 0  |
| Milby1993    | Triazolam plus behavioral therapy        | BT        | 1993 | 0  | 1  | 0  | 0  | 0  | 0  | 1  | 0  | 1  | 1  | 0 | 1  | 1   | 0  | 1  | 0  | 0  | 0  |
| Milby1993    | Triazolam plus sleep-related information | PE        | 1993 | 0  | 1  | 0  | 0  | 0  | 0  | 0  | 0  | 0  | 1  | 0 | 1  | 1   | 0  | 1  | 0  | 0  | 0  |
| Miller2021   | CBT-I                                    | CBT       | 2021 | 1  | 1  | 1  | 0  | 0  | 1  | 1  | 0  | 1  | 1  | 0 | 1  | 1   | 0  | 1  | 0  | 0  | 0  |

| Trial              | Arm           | Treatment | Year | se | sd | cr | th | cw | sr | sc | pi | re | ns | w | dt | ind | gp | ff | tg | he | ae |
|--------------------|---------------|-----------|------|----|----|----|----|----|----|----|----|----|----|---|----|-----|----|----|----|----|----|
| Miller2021         | SE            | PE        | 2021 | 1  | 1  | 0  | 0  | 0  | 0  | 0  | 0  | 0  | 1  | 0 | 1  | 1   | 0  | 1  | 0  | 0  | 0  |
| Miller2023         | CBT-I         | CBT       | 2023 | 1  | 1  | 1  | 0  | 0  | 1  | 1  | 0  | 1  | 1  | 0 | 1  | 1   | 0  | 1  | 0  | 0  | 0  |
| Miller2023         | Sleep hygiene | PE        | 2023 | 1  | 1  | 0  | 0  | 0  | 0  | 0  | 0  | 0  | 1  | 0 | 1  | 1   | 0  | 1  | 0  | 0  | 0  |
| Mimeault1999       | BT            | CBT       | 1999 | 1  | 1  | 1  | 0  | 0  | 1  | 1  | 0  | 0  | 1  | 0 | 1  | 0   | 0  | 0  | 0  | 0  | 0  |
| Mimeault1999       | BTPC          | CBT       | 1999 | 1  | 1  | 1  | 0  | 0  | 1  | 1  | 0  | 0  | 1  | 0 | 1  | 0   | 0  | 0  | 1  | 1  | 0  |
| Mimeault1999       | WLC           | WL        | 1999 | 0  | 1  | 0  | 0  | 0  | 0  | 0  | 0  | 0  | 0  | 1 | 1  | 0   | 0  | 0  | 0  | 0  | 0  |
| Miro2011           | CBT           | CBT       | 2011 | 1  | 1  | 1  | 0  | 0  | 1  | 1  | 0  | 1  | 1  | 0 | 1  | 0   | 1  | 1  | 0  | 0  | 0  |
| Miro2011           | SH            | WL        | 2011 | 1  | 0  | 0  | 0  | 0  | 0  | 0  | 0  | 0  | 1  | 1 | 1  | 0   | 1  | 1  | 0  | 0  | 0  |
| Morawetz1989(SOL)  | Therapist     | BT        | 1989 | 0  | 1  | 0  | 0  | 0  | 0  | 1  | 0  | 1  | 1  | 0 | 0  | 0   | 1  | 1  | 0  | 0  | 0  |
| Morawetz1989(SOL)  | Tape          | BT        | 1989 | 0  | 1  | 0  | 0  | 0  | 0  | 1  | 0  | 1  | 1  | 0 | 0  | 0   | 0  | 0  | 0  | 0  | 0  |
| Morawetz1989(SOL)  | WL            | WL        | 1989 | 0  | 1  | 0  | 0  | 0  | 0  | 0  | 0  | 0  | 0  | 1 | 0  | 0   | 0  | 0  | 0  | 0  | 0  |
| Morawetz1989(WASO) | Tape          | BT        | 1989 | 0  | 1  | 0  | 0  | 0  | 0  | 1  | 0  | 1  | 1  | 0 | 0  | 0   | 0  | 0  | 0  | 0  | 0  |
| Morawetz1989(WASO) | WL            | WL        | 1989 | 0  | 1  | 0  | 0  | 0  | 0  | 0  | 0  | 0  | 0  | 1 | 0  | 0   | 0  | 0  | 0  | 0  | 0  |
| Morgan2012         | Treatment     | CBT       | 2012 | 1  | 1  | 1  | 0  | 0  | 1  | 1  | 0  | 0  | 1  | 0 | 1  | 1   | 0  | 0  | 1  | 1  | 0  |
| Morgan2012         | TAU           | PE        | 2012 | 1  | 0  | 0  | 0  | 0  | 0  | 0  | 0  | 0  | 1  | 0 | 1  | 1   | 0  | 0  | 0  | 0  | 0  |
| Morin1988          | SC            | BT        | 1988 | 0  | 1  | 0  | 0  | 0  | 0  | 1  | 0  | 0  | 1  | 0 | 1  | 0   | 1  | 1  | 0  | 0  | 0  |
| Morin1988          | IR            | PE        | 1988 | 0  | 1  | 0  | 0  | 0  | 0  | 0  | 0  | 0  | 1  | 0 | 1  | 0   | 1  | 1  | 0  | 0  | 0  |
| Morin1988          | WL            | WL        | 1988 | 0  | 1  | 0  | 0  | 0  | 0  | 0  | 0  | 0  | 0  | 1 | 1  | 0   | 0  | 0  | 0  | 0  | 0  |
| Morin1993          | CBT           | CBT       | 1993 | 1  | 1  | 1  | 0  | 0  | 1  | 1  | 0  | 0  | 1  | 0 | 0  | 0   | 1  | 1  | 0  | 0  | 0  |
| Morin1993          | WLC           | WL        | 1993 | 0  | 1  | 0  | 0  | 0  | 0  | 0  | 0  | 0  | 0  | 1 | 0  | 0   | 0  | 0  | 0  | 0  | 0  |
| Morin1999          | Combined      | CBT       | 1999 | 1  | 1  | 1  | 0  | 0  | 1  | 1  | 0  | 0  | 1  | 0 | 1  | 1   | 1  | 1  | 0  | 0  | 0  |
| Morin1999          | PCT           | PE        | 1999 | 0  | 1  | 0  | 0  | 0  | 0  | 0  | 0  | 0  | 1  | 0 | 1  | 1   | 0  | 1  | 0  | 0  | 0  |
| NCT00127790-1      | CBT-I         | CBT       | 2012 | 1  | 0  | 1  | 0  | 0  | 1  | 1  | 0  | 1  | 1  | 0 | 1  | 1   | 0  | 1  | 0  | 0  | 0  |
| NCT00127790-1      | WL            | WL        | 2012 | 0  | 0  | 0  | 0  | 0  | 0  | 0  | 0  | 0  | 0  | 1 | 1  | 0   | 0  | 0  | 0  | 0  | 0  |
| NCT00127790-2      | CBT-P         | CBT       | 2012 | 0  | 0  | 1  | 0  | 0  | 0  | 0  | 0  | 1  | 1  | 0 | 1  | 1   | 0  | 1  | 0  | 0  | 0  |
| NCT00127790-2      | CBT-P/I       | CBT       | 2012 | 1  | 0  | 1  | 0  | 0  | 1  | 1  | 0  | 1  | 1  | 0 | 1  | 1   | 0  | 1  | 0  | 0  | 0  |

| Trial            | Arm                      | Treatment | Year | se | sd | cr | th | cw | sr | sc | pi | re | ns | w | dt | ind | gp | ff | tg | he | ae |
|------------------|--------------------------|-----------|------|----|----|----|----|----|----|----|----|----|----|---|----|-----|----|----|----|----|----|
| NCT01011218-1    | BBTI-Armodafil           | BT        | 2018 | 1  | 1  | 0  | 0  | 0  | 1  | 1  | 0  | 0  | 1  | 0 | 0  | 1   | 0  | 1  | 0  | 0  | 0  |
| NCT01011218-1    | BP-Armodafil             | PE        | 2018 | 1  | 0  | 0  | 0  | 0  | 0  | 0  | 0  | 0  | 1  | 0 | 0  | 0   | 0  | 0  | 0  | 0  | 0  |
| NCT01011218-2    | BBTI-without armodafil   | BT        | 2018 | 1  | 1  | 0  | 0  | 0  | 1  | 1  | 0  | 0  | 1  | 0 | 0  | 1   | 0  | 1  | 0  | 0  | 0  |
| NCT01011218-2    | BP-withou armodafil      | PE        | 2018 | 1  | 0  | 0  | 0  | 0  | 0  | 0  | 0  | 0  | 1  | 0 | 0  | 0   | 0  | 0  | 0  | 0  | 0  |
| NCT01987089      | CBTI                     | CBT       | 2020 | 1  | 1  | 1  | 0  | 0  | 1  | 1  | 0  | 0  | 1  | 0 | 0  | 1   | 0  | 1  | 0  | 0  | 0  |
| NCT01987089      | QDT                      | PE        | 2020 | 0  | 1  | 0  | 0  | 0  | 0  | 0  | 0  | 0  | 1  | 0 | 0  | 1   | 0  | 1  | 0  | 0  | 0  |
| NCT02613364      | CBTI                     | CBT       | 2021 | 1  | 0  | 1  | 0  | 0  | 1  | 1  | 0  | 0  | 1  | 0 | 1  | 1   | 0  | 1  | 0  | 0  | 0  |
| NCT02613364      | Educational intervention | TAU       | 2021 | 0  | 0  | 0  | 0  | 0  | 0  | 0  | 0  | 0  | 1  | 0 | 1  | 1   | 0  | 1  | 0  | 0  | 0  |
| NCT03964974      | CBTI-CU                  | CBT       | 2022 | 1  | 1  | 1  | 0  | 0  | 1  | 1  | 0  | 1  | 1  | 0 | 0  | 1   | 0  | 1  | 0  | 0  | 0  |
| NCT03964974      | SHE                      | PE        | 2022 | 1  | 0  | 0  | 0  | 0  | 0  | 0  | 0  | 0  | 1  | 0 | 0  | 1   | 0  | 1  | 0  | 0  | 0  |
| NorellClarke2015 | CBT-I                    | CBT       | 2015 | 1  | 1  | 1  | 0  | 1  | 1  | 1  | 0  | 0  | 1  | 0 | 1  | 0   | 1  | 1  | 0  | 0  | 0  |
| NorellClarke2015 | RT                       | RT        | 2015 | 0  | 1  | 0  | 0  | 0  | 0  | 0  | 0  | 1  | 1  | 0 | 1  | 0   | 1  | 1  | 0  | 0  | 0  |
| Okajima2020      | tailored+standard BBTI   | BT        | 2020 | 1  | 1  | 0  | 0  | 0  | 1  | 1  | 0  | 1  | 1  | 0 | 0  | 0   | 0  | 0  | 1  | 0  | 1  |
| Okajima2020      | self-monitoring          | WL        | 2020 | 0  | 1  | 0  | 0  | 0  | 0  | 0  | 0  | 0  | 0  | 1 | 0  | 0   | 0  | 0  | 0  | 0  | 0  |
| Okajima2020      | waitig list              | WL        | 2020 | 0  | 0  | 0  | 0  | 0  | 0  | 0  | 0  | 0  | 0  | 1 | 0  | 0   | 0  | 0  | 0  | 0  | 0  |
| Okajima2021      | REFRESH                  | CBT       | 2022 | 0  | 1  | 1  | 1  | 0  | 1  | 1  | 0  | 1  | 1  | 0 | 0  | 0   | 0  | 0  | 1  | 1  | 0  |
| Okajima2021      | Self-Monitoring          | PE        | 2022 | 0  | 1  | 0  | 0  | 0  | 0  | 0  | 0  | 0  | 1  | 0 | 0  | 0   | 0  | 0  | 1  | 1  | 0  |
| Ong2018          | MBTI                     | CBT       | 2014 | 0  | 1  | 0  | 1  | 0  | 1  | 1  | 0  | 0  | 1  | 0 | 0  | 0   | 1  | 1  | 0  | 0  | 0  |
| Ong2018          | MBSR                     | CT        | 2014 | 0  | 1  | 0  | 1  | 0  | 0  | 0  | 0  | 0  | 1  | 0 | 0  | 0   | 1  | 1  | 0  | 0  | 0  |
| Ong2018          | SMC                      | WL        | 2014 | 0  | 1  | 0  | 0  | 0  | 0  | 0  | 0  | 0  | 0  | 1 | 0  | 0   | 0  | 0  | 0  | 0  | 0  |
| Ong2020          | Arm B                    | CBT       | 2020 | 1  | 1  | 1  | 0  | 0  | 1  | 1  | 0  | 0  | 1  | 0 | 0  | 1   | 0  | 1  | 0  | 0  | 0  |
| Ong2020          | Arm C                    | PE        | 2020 | 0  | 1  | 0  | 0  | 0  | 0  | 0  | 0  | 0  | 1  | 0 | 0  | 1   | 0  | 1  | 0  | 0  | 0  |
| Oswald2022       | Intervention             | CBT       | 2022 | 1  | 1  | 1  | 0  | 0  | 1  | 1  | 0  | 0  | 1  | 0 | 1  | 0   | 1  | 1  | 0  | 0  | 0  |
| Oswald2022       | Control                  | WL        | 2022 | 0  | 0  | 0  | 0  | 0  | 0  | 0  | 0  | 0  | 0  | 1 | 1  | 0   | 0  | 0  | 0  | 0  | 0  |
| Padron2022       | CBTi.p.                  | CBT       | 2022 | 1  | 1  | 1  | 1  | 0  | 1  | 1  | 0  | 1  | 1  | 0 | 1  | 1   | 0  | 1  | 0  | 0  | 0  |
| Padron2022       | PE                       | PE        | 2022 | 0  | 1  | 0  | 0  | 0  | 0  | 0  | 0  | 0  | 1  | 0 | 1  | 1   | 0  | 1  | 0  | 0  | 0  |

| Trial           | Arm               | Treatment | Year | se | sd | cr | th | cw | sr | sc | pi | re | ns | w | dt | ind | gp | ff | tg | he | ae |
|-----------------|-------------------|-----------|------|----|----|----|----|----|----|----|----|----|----|---|----|-----|----|----|----|----|----|
| Palesh2018      | BBT-CI            | BT        | 2018 | 1  | 0  | 0  | 0  | 0  | 1  | 1  | 0  | 0  | 1  | 0 | 1  | 1   | 0  | 1  | 0  | 0  | 0  |
| Palesh2018      | HEAL              | TAU       | 2018 | 0  | 0  | 0  | 0  | 0  | 0  | 0  | 0  | 0  | 1  | 0 | 1  | 1   | 0  | 1  | 0  | 0  | 0  |
| Palesh2020      | BBT-I             | BT        | 2020 | 1  | 0  | 0  | 0  | 0  | 1  | 1  | 0  | 0  | 1  | 0 | 0  | 1   | 0  | 1  | 0  | 0  | 0  |
| Palesh2020      | Sleep education   | PE        | 2020 | 1  | 0  | 0  | 0  | 0  | 0  | 0  | 0  | 0  | 0  | 0 | 0  | 0   | 0  | 0  | 0  | 0  | 0  |
| Patel2017       | Case              | CBT       | 2017 | 0  | 1  | 0  | 1  | 0  | 1  | 1  | 0  | 1  | 0  | 0 | 0  | 0   | 0  | 0  | 0  | 1  | 1  |
| Patel2017       | Control           | PE        | 2017 | 1  | 0  | 0  | 0  | 0  | 0  | 0  | 0  | 0  | 0  | 0 | 0  | 0   | 0  | 0  | 0  | 1  | 0  |
| Perlis2004      | M+CBT             | CBT       | 2004 | 1  | 1  | 1  | 0  | 0  | 1  | 1  | 0  | 0  | 1  | 0 | 1  | 1   | 0  | 1  | 0  | 0  | 0  |
| Perlis2004      | M+CC              | PE        | 2004 | 0  | 1  | 0  | 0  | 0  | 0  | 0  | 0  | 0  | 1  | 0 | 1  | 1   | 0  | 1  | 0  | 0  | 0  |
| Perrault2022    | TX                | CBT       | 2022 | 1  | 1  | 1  | 0  | 0  | 1  | 1  | 0  | 1  | 1  | 0 | 0  | 0   | 1  | 1  | 0  | 0  | 0  |
| Perrault2022    | WL                | WL        | 2022 | 0  | 1  | 0  | 0  | 0  | 0  | 0  | 0  | 0  | 0  | 1 | 0  | 0   | 0  | 0  | 0  | 0  | 0  |
| Pigeon2017      | CBT-I             | CBT       | 2017 | 1  | 1  | 1  | 0  | 0  | 1  | 1  | 0  | 1  | 1  | 0 | 0  | 1   | 0  | 1  | 0  | 0  | 0  |
| Pigeon2017      | SH                | PE        | 2017 | 1  | 1  | 0  | 0  | 0  | 0  | 0  | 0  | 0  | 1  | 0 | 0  | 1   | 0  | 1  | 0  | 0  | 0  |
| Pigeon2019      | CBTi              | CBT       | 2019 | 1  | 1  | 1  | 0  | 0  | 1  | 1  | 0  | 0  | 1  | 0 | 1  | 1   | 0  | 1  | 0  | 0  | 0  |
| Pigeon2019      | TAU               | TAU       | 2019 | 0  | 0  | 0  | 0  | 0  | 0  | 0  | 0  | 0  | 1  | 0 | 1  | 1   | 0  | 1  | 0  | 0  | 0  |
| Pigeon2022      | CBTI+CPT          | CBT       | 2021 | 1  | 1  | 1  | 0  | 0  | 1  | 1  | 0  | 0  | 1  | 0 | 0  | 1   | 0  | 1  | 0  | 0  | 0  |
| Pigeon2022      | Control+CPT       | PE        | 2021 | 0  | 1  | 0  | 0  | 0  | 0  | 0  | 0  | 0  | 1  | 0 | 0  | 1   | 0  | 0  | 0  | 0  | 0  |
| Pillai2015      | CBTI              | CBT       | 2015 | 1  | 1  | 1  | 1  | 0  | 1  | 1  | 1  | 1  | 1  | 0 | 0  | 0   | 0  | 0  | 0  | 0  | 1  |
| Pillai2015      | IC                | PE        | 2015 | 1  | 1  | 0  | 0  | 0  | 0  | 0  | 0  | 0  | 0  | 0 | 0  | 0   | 0  | 0  | 0  | 0  | 0  |
| Prados2020      | CBTI-C            | CBT       | 2020 | 1  | 1  | 1  | 0  | 0  | 1  | 1  | 0  | 1  | 1  | 0 | 1  | 0   | 1  | 1  | 0  | 0  | 0  |
| Prados2020      | CBTI-P            | CBT       | 2020 | 0  | 0  | 1  | 0  | 0  | 0  | 0  | 0  | 1  | 1  | 0 | 1  | 0   | 1  | 1  | 0  | 0  | 0  |
| Quintiliani2017 | PI+               | CT        | 2017 | 0  | 1  | 1  | 0  | 0  | 0  | 0  | 0  | 0  | 1  | 0 | 0  | 1   | 0  | 1  | 0  | 0  | 0  |
| Quintiliani2017 | PI-               | PE        | 2017 | 0  | 1  | 0  | 0  | 0  | 0  | 0  | 0  | 0  | 0  | 0 | 0  | 0   | 0  | 0  | 0  | 0  | 0  |
| Redeker2015     | CBTI              | CBT       | 2015 | 1  | 1  | 1  | 0  | 0  | 1  | 1  | 0  | 1  | 1  | 1 | 1  | 0   | 1  | 1  | 0  | 0  | 0  |
| Redeker2015     | Attention Control | WL        | 2015 | 1  | 1  | 0  | 0  | 0  | 0  | 0  | 0  | 0  | 1  | 1 | 1  | 0   | 1  | 1  | 0  | 0  | 0  |
| Redeker2022     | CBT-I             | CBT       | 2022 | 1  | 1  | 1  | 0  | 0  | 1  | 1  | 0  | 1  | 1  | 0 | 1  | 1   | 1  | 1  | 0  | 0  | 0  |
| Redeker2022     | Attention Control | PE        | 2022 | 1  | 1  | 0  | 0  | 0  | 0  | 0  | 0  | 0  | 1  | 0 | 1  | 1   | 1  | 1  | 0  | 0  | 0  |

| Trial          | Arm               | Treatment | Year | se | sd | cr | th | cw | sr | sc | pi | re | ns | w | dt | ind | gp | ff | tg | he | ae |   |
|----------------|-------------------|-----------|------|----|----|----|----|----|----|----|----|----|----|---|----|-----|----|----|----|----|----|---|
| Ritterband2009 | SHUTi             | CBT       | 2009 | 1  | 1  | 1  | 0  | 0  | 1  | 1  | 0  | 0  | 1  | 0 | 1  | 0   | 0  | 0  | 0  | 0  | 0  | 1 |
| Ritterband2009 | Wait-list         | WL        | 2009 | 0  | 1  | 0  | 0  | 0  | 0  | 0  | 0  | 0  | 0  | 1 | 1  | 0   | 0  | 0  | 0  | 0  | 0  | 0 |
| Ritterband2012 | Internet          | CBT       | 2012 | 1  | 1  | 1  | 0  | 0  | 1  | 1  | 0  | 0  | 1  | 0 | 1  | 0   | 0  | 0  | 0  | 0  | 0  | 1 |
| Ritterband2012 | Control           | WL        | 2012 | 0  | 1  | 0  | 0  | 0  | 0  | 0  | 0  | 0  | 1  | 1 | 1  | 0   | 0  | 0  | 0  | 0  | 0  | 0 |
| Ritterband2017 | SHUTi             | CBT       | 2017 | 1  | 1  | 1  | 0  | 0  | 1  | 1  | 0  | 0  | 1  | 0 | 1  | 0   | 0  | 0  | 0  | 0  | 0  | 1 |
| Ritterband2017 | Patient education | PE        | 2017 | 1  | 0  | 0  | 0  | 0  | 0  | 0  | 0  | 0  | 0  | 0 | 1  | 0   | 0  | 0  | 0  | 0  | 0  | 0 |
| Robabeh2015    | CBT               | CBT       | 2015 | 1  | 0  | 1  | 0  | 0  | 1  | 1  | 0  | 0  | 1  | 0 | 1  | 1   | 0  | 1  | 0  | 0  | 0  | 0 |
| Robabeh2015    | BPT               | PE        | 2015 | 0  | 1  | 0  | 0  | 0  | 0  | 0  | 0  | 0  | 1  | 0 | 1  | 1   | 0  | 1  | 0  | 0  | 0  | 0 |
| Roscoe2015-1   | CBTI+placebo      | CBT       | 2015 | 1  | 1  | 1  | 0  | 0  | 1  | 1  | 0  | 0  | 1  | 0 | 0  | 1   | 0  | 1  | 0  | 0  | 0  | 0 |
| Roscoe2015-1   | placebo           | PE        | 2015 | 1  | 0  | 0  | 0  | 0  | 0  | 0  | 0  | 0  | 1  | 0 | 0  | 1   | 0  | 1  | 0  | 0  | 0  | 0 |
| Roscoe2015-2   | CBTI+armodafil    | CBT       | 2015 | 1  | 1  | 1  | 0  | 0  | 1  | 1  | 0  | 0  | 1  | 0 | 0  | 1   | 0  | 1  | 0  | 0  | 0  | 0 |
| Roscoe2015-2   | armodafil         | PE        | 2015 | 1  | 0  | 0  | 0  | 0  | 0  | 0  | 0  | 0  | 1  | 0 | 0  | 1   | 0  | 1  | 0  | 0  | 0  | 0 |
| Rosen2000      | Education control | PE        | 2000 | 0  | 1  | 0  | 0  | 0  | 0  | 0  | 0  | 0  | 1  | 0 | 1  | 0   | 1  | 1  | 0  | 0  | 0  | 0 |
| Rosen2000      | M+G               | RT        | 2000 | 0  | 1  | 0  | 0  | 0  | 0  | 0  | 0  | 1  | 1  | 0 | 1  | 0   | 1  | 1  | 0  | 0  | 0  | 0 |
| Rybarczyk2005  | CBT               | CBT       | 2005 | 1  | 1  | 1  | 0  | 0  | 1  | 1  | 0  | 1  | 1  | 0 | 1  | 0   | 1  | 1  | 0  | 0  | 0  | 0 |
| Rybarczyk2005  | SMW               | CT        | 2005 | 0  | 1  | 0  | 1  | 0  | 0  | 0  | 0  | 0  | 1  | 1 | 1  | 0   | 1  | 1  | 0  | 0  | 0  | 0 |
| Sadler2018     | CBT-I             | CBT       | 2018 | 1  | 1  | 1  | 0  | 0  | 1  | 1  | 0  | 1  | 1  | 0 | 1  | 0   | 1  | 1  | 0  | 0  | 0  | 0 |
| Sadler2018     | PCG               | PE        | 2018 | 1  | 1  | 0  | 0  | 0  | 0  | 0  | 0  | 0  | 1  | 0 | 1  | 0   | 1  | 1  | 0  | 0  | 0  | 0 |
| Sandlund2017   | Intervention      | CBT       | 2017 | 1  | 1  | 1  | 0  | 1  | 1  | 1  | 1  | 1  | 1  | 0 | 1  | 0   | 1  | 1  | 0  | 0  | 0  | 0 |
| Sandlund2017   | Control           | WL        | 2017 | 0  | 1  | 0  | 0  | 0  | 0  | 0  | 0  | 0  | 0  | 1 | 1  | 0   | 0  | 0  | 0  | 0  | 0  | 0 |
| Sato2019       | ICBT+UC           | CBT       | 2019 | 1  | 1  | 1  | 0  | 0  | 1  | 1  | 0  | 1  | 1  | 0 | 1  | 0   | 0  | 0  | 0  | 0  | 1  | 0 |
| Sato2019       | UC                | WL        | 2019 | 1  | 1  | 0  | 0  | 0  | 0  | 0  | 0  | 0  | 1  | 1 | 1  | 0   | 0  | 0  | 0  | 0  | 0  | 0 |
| Sato2022       | ICBT              | CBT       | 2022 | 0  | 1  | 1  | 0  | 0  | 1  | 1  | 0  | 0  | 1  | 0 | 0  | 0   | 0  | 0  | 0  | 0  | 0  | 0 |
| Sato2022       | WLC               | WL        | 2022 | 0  | 0  | 0  | 0  | 0  | 0  | 0  | 0  | 0  | 0  | 1 | 0  | 0   | 0  | 0  | 0  | 0  | 0  | 0 |
| Savard2005     | CBT               | CBT       | 2005 | 1  | 1  | 1  | 0  | 0  | 1  | 1  | 0  | 0  | 1  | 0 | 1  | 0   | 1  | 1  | 0  | 0  | 0  | 0 |
| Savard2005     | WL                | WL        | 2005 | 0  | 1  | 0  | 0  | 0  | 0  | 0  | 0  | 0  | 0  | 1 | 1  | 0   | 0  | 0  | 0  | 0  | 0  | 0 |

| Trial          | Arm          | Treatment | Year | se | sd | cr | th | cw | sr | sc | pi | re | ns | w | dt | ind | gp | ff | tg | he | ae |
|----------------|--------------|-----------|------|----|----|----|----|----|----|----|----|----|----|---|----|-----|----|----|----|----|----|
| Savard2014     | PCBT-I       | CBT       | 2014 | 1  | 1  | 1  | 0  | 0  | 1  | 1  | 0  | 0  | 1  | 0 | 1  | 1   | 0  | 1  | 0  | 0  | 0  |
| Savard2014     | VCBT-I       | CBT       | 2014 | 1  | 1  | 1  | 0  | 0  | 1  | 1  | 0  | 0  | 1  | 0 | 1  | 0   | 0  | 0  | 1  | 0  | 0  |
| Savard2014     | CTL          | PE        | 2014 | 0  | 1  | 0  | 0  | 0  | 0  | 0  | 0  | 0  | 0  | 0 | 1  | 0   | 0  | 0  | 0  | 0  | 0  |
| Schuffelen2023 | dCBT-I       | CBT       | 2023 | 1  | 1  | 1  | 0  | 0  | 1  | 1  | 0  | 1  | 1  | 0 | 1  | 0   | 0  | 0  | 0  | 0  | 0  |
| Schuffelen2023 | Control      | WL        | 2023 | 0  | 1  | 0  | 0  | 0  | 0  | 0  | 0  | 0  | 0  | 1 | 1  | 0   | 0  | 0  | 0  | 0  | 0  |
| Sgoifo2017     | Exposed      | CBT       | 2017 | 0  | 0  | 0  | 1  | 0  | 0  | 0  | 0  | 1  | 1  | 0 | 1  | 0   | 1  | 1  | 0  | 0  | 0  |
| Sgoifo2017     | Control      | WL        | 2017 | 0  | 0  | 0  | 0  | 0  | 0  | 0  | 0  | 0  | 0  | 1 | 1  | 0   | 0  | 0  | 0  | 0  | 0  |
| Sheaves2018    | STAC         | CBT       | 2018 | 1  | 0  | 1  | 0  | 0  | 1  | 1  | 0  | 0  | 1  | 0 | 1  | 1   | 0  | 1  | 0  | 0  | 0  |
| Sheaves2018    | standard     | TAU       | 2018 | 0  | 0  | 0  | 0  | 0  | 0  | 0  | 0  | 0  | 1  | 0 | 1  | 1   | 0  | 1  | 0  | 0  | 0  |
| Shimamoto2022  | SPA          | BT        | 2022 | 1  | 1  | 0  | 0  | 0  | 1  | 1  | 0  | 0  | 1  | 0 | 1  | 0   | 0  | 0  | 0  | 0  | 1  |
| Shimamoto2022  | Control      | WL        | 2022 | 0  | 0  | 0  | 0  | 0  | 0  | 0  | 0  | 0  | 0  | 1 | 1  | 0   | 0  | 0  | 0  | 0  | 0  |
| Shin2023       | CBT-I        | CBT       | 2023 | 1  | 1  | 1  | 0  | 0  | 1  | 1  | 0  | 1  | 1  | 0 | 0  | 1   | 0  | 1  | 0  | 0  | 0  |
| Shin2023       | ACT          | CT        | 2023 | 1  | 1  | 0  | 1  | 0  | 0  | 0  | 0  | 0  | 1  | 0 | 0  | 1   | 0  | 1  | 0  | 0  | 0  |
| Short2021      | BBTI         | BT        | 2021 | 1  | 1  | 0  | 0  | 0  | 1  | 1  | 0  | 0  | 1  | 0 | 0  | 1   | 0  | 1  | 0  | 0  | 0  |
| Short2021      | Control      | WL        | 2021 | 0  | 1  | 0  | 0  | 0  | 0  | 0  | 0  | 0  | 0  | 1 | 0  | 0   | 0  | 0  | 0  | 0  | 0  |
| Siebmns2021    | Intervention | CBT       | 2021 | 1  | 1  | 1  | 0  | 0  | 1  | 1  | 0  | 1  | 1  | 0 | 1  | 0   | 0  | 0  | 1  | 1  | 0  |
| Siebmns2021    | Control      | WL        | 2021 | 1  | 1  | 0  | 0  | 0  | 0  | 0  | 0  | 0  | 1  | 1 | 1  | 0   | 0  | 0  | 0  | 0  | 0  |
| Siengsukon2020 | CBTI         | CBT       | 2020 | 1  | 1  | 1  | 1  | 0  | 1  | 1  | 0  | 1  | 1  | 0 | 1  | 1   | 0  | 1  | 0  | 0  | 0  |
| Siengsukon2020 | BE           | PE        | 2020 | 1  | 0  | 0  | 0  | 0  | 0  | 0  | 0  | 0  | 1  | 0 | 1  | 1   | 0  | 1  | 0  | 0  | 0  |
| Siengsukon2020 | AC           | TAU       | 2020 | 0  | 0  | 0  | 0  | 0  | 0  | 0  | 0  | 0  | 1  | 0 | 1  | 1   | 0  | 1  | 0  | 0  | 0  |
| Siengsukon2021 | wCBT-I       | CBT       | 2021 | 1  | 1  | 1  | 1  | 0  | 1  | 1  | 0  | 1  | 1  | 0 | 1  | 0   | 0  | 0  | 0  | 0  | 1  |
| Siengsukon2021 | wCBT-I+calls | CBT       | 2021 | 1  | 1  | 1  | 1  | 0  | 1  | 1  | 0  | 1  | 1  | 0 | 1  | 0   | 0  | 0  | 1  | 1  | 1  |
| Simeit2004     | PMR          | CBT       | 2004 | 1  | 0  | 1  | 0  | 0  | 0  | 1  | 0  | 1  | 1  | 0 | 1  | 0   | 1  | 1  | 0  | 0  | 0  |
| Simeit2004     | C-group      | RT        | 2004 | 0  | 0  | 0  | 0  | 0  | 0  | 0  | 0  | 1  | 1  | 0 | 1  | 0   | 1  | 1  | 0  | 0  | 0  |
| Smith2015      | CBT-I        | CBT       | 2015 | 1  | 1  | 1  | 0  | 0  | 1  | 1  | 0  | 0  | 1  | 0 | 0  | 1   | 0  | 1  | 0  | 0  | 0  |
| Smith2015      | BD           | PE        | 2015 | 0  | 1  | 0  | 0  | 0  | 0  | 0  | 0  | 0  | 1  | 0 | 0  | 1   | 0  | 1  | 0  | 0  | 0  |

| Trial          | Arm            | Treatment | Year | se | sd | cr | th | cw | sr | sc | pi | re | ns | w | dt | ind | gp | ff | tg | he | ae |
|----------------|----------------|-----------|------|----|----|----|----|----|----|----|----|----|----|---|----|-----|----|----|----|----|----|
| Smitherman2016 | CBTi           | BT        | 2016 | 1  | 1  | 0  | 0  | 0  | 1  | 1  | 0  | 0  | 1  | 0 | 1  | 1   | 0  | 1  | 0  | 0  | 0  |
| Smitherman2016 | Control        | PE        | 2016 | 0  | 1  | 0  | 0  | 0  | 0  | 0  | 0  | 0  | 1  | 0 | 1  | 1   | 0  | 1  | 0  | 0  | 0  |
| Soeffing2008   | CBTi           | BT        | 2008 | 1  | 1  | 0  | 0  | 0  | 0  | 1  | 0  | 1  | 1  | 0 | 1  | 1   | 0  | 1  | 0  | 0  | 0  |
| Soeffing2008   | Placebo        | PE        | 2008 | 0  | 1  | 0  | 0  | 0  | 0  | 0  | 0  | 0  | 1  | 0 | 1  | 1   | 0  | 1  | 0  | 0  | 0  |
| Song2020       | CBTi           | CBT       | 2020 | 1  | 1  | 1  | 0  | 0  | 1  | 1  | 0  | 1  | 1  | 0 | 1  | 1   | 0  | 1  | 0  | 0  | 0  |
| Song2020       | NonCBTi        | PE        | 2020 | 1  | 1  | 0  | 0  | 0  | 0  | 0  | 0  | 0  | 1  | 0 | 1  | 1   | 0  | 1  | 0  | 0  | 0  |
| Speed2022      | gCBT-I         | CBT       | 2022 | 1  | 1  | 1  | 0  | 0  | 1  | 1  | 0  | 0  | 1  | 0 | 0  | 0   | 1  | 1  | 0  | 0  | 0  |
| Speed2022      | SOC            | PE        | 2022 | 0  | 1  | 0  | 0  | 0  | 0  | 0  | 0  | 0  | 1  | 0 | 0  | 1   | 1  | 1  | 0  | 0  | 0  |
| Strom2004      | Treatment      | CBT       | 2004 | 1  | 1  | 1  | 0  | 0  | 1  | 1  | 0  | 1  | 1  | 0 | 1  | 0   | 0  | 0  | 0  | 0  | 1  |
| Strom2004      | Waitlist       | WL        | 2004 | 0  | 1  | 0  | 0  | 0  | 0  | 0  | 0  | 0  | 0  | 1 | 1  | 0   | 0  | 0  | 0  | 0  | 0  |
| Store2022      | Intervention   | RT        | 2022 | 0  | 1  | 0  | 0  | 0  | 0  | 0  | 0  | 1  | 1  | 0 | 1  | 0   | 0  | 0  | 0  | 0  | 0  |
| Store2022      | Waitlist       | WL        | 2022 | 0  | 1  | 0  | 0  | 0  | 0  | 0  | 0  | 0  | 0  | 1 | 1  | 0   | 0  | 0  | 0  | 0  | 0  |
| Sunnheld2020   | BT             | BT        | 2020 | 1  | 1  | 0  | 0  | 0  | 1  | 1  | 0  | 0  | 1  | 0 | 1  | 0   | 0  | 0  | 1  | 1  | 1  |
| Sunnheld2020   | CT             | CT        | 2020 | 0  | 1  | 1  | 0  | 0  | 0  | 0  | 0  | 0  | 1  | 0 | 1  | 0   | 0  | 0  | 1  | 1  | 1  |
| Sunnheld2020   | WL             | WL        | 2020 | 0  | 1  | 0  | 0  | 0  | 0  | 0  | 0  | 0  | 0  | 1 | 1  | 0   | 0  | 0  | 0  | 0  | 1  |
| Sveen2021      | Intervention   | CBT       | 2021 | 1  | 1  | 1  | 0  | 0  | 1  | 1  | 0  | 1  | 1  | 0 | 1  | 0   | 0  | 0  | 1  | 1  | 0  |
| Sveen2021      | Control        | CT        | 2021 | 1  | 0  | 0  | 1  | 0  | 0  | 0  | 0  | 0  | 1  | 0 | 1  | 0   | 0  | 0  | 0  | 0  | 0  |
| Sweetman2019   | CBTi           | CBT       | 2019 | 1  | 1  | 1  | 0  | 0  | 1  | 0  | 0  | 0  | 1  | 0 | 1  | 1   | 1  | 1  | 0  | 0  | 0  |
| Sweetman2019   | Control        | WL        | 2019 | 0  | 1  | 0  | 0  | 0  | 0  | 0  | 0  | 0  | 0  | 1 | 1  | 0   | 0  | 0  | 0  | 0  | 0  |
| Talbot2014     | CBT-I          | CBT       | 2014 | 1  | 1  | 1  | 0  | 0  | 1  | 1  | 0  | 0  | 1  | 0 | 0  | 1   | 0  | 1  | 0  | 0  | 0  |
| Talbot2014     | Waitlist       | WL        | 2014 | 0  | 1  | 0  | 0  | 0  | 0  | 0  | 0  | 0  | 0  | 1 | 0  | 0   | 0  | 0  | 0  | 1  | 0  |
| Taylor2014a    | CBTi           | CBT       | 2014 | 1  | 1  | 1  | 0  | 0  | 1  | 1  | 0  | 1  | 1  | 0 | 0  | 1   | 0  | 1  | 0  | 0  | 0  |
| Taylor2014a    | WLC            | WL        | 2014 | 0  | 1  | 0  | 0  | 0  | 0  | 0  | 0  | 0  | 0  | 1 | 0  | 0   | 0  | 0  | 0  | 0  | 0  |
| Taylor2017     | Internet CBTi  | CBT       | 2017 | 1  | 1  | 1  | 0  | 0  | 1  | 1  | 0  | 1  | 1  | 0 | 1  | 0   | 0  | 0  | 0  | 0  | 1  |
| Taylor2017     | In-person CBTi | CBT       | 2017 | 1  | 1  | 1  | 0  | 0  | 1  | 1  | 0  | 1  | 1  | 0 | 1  | 1   | 0  | 1  | 0  | 0  | 0  |
| Taylor2017     | Control        | PE        | 2017 | 0  | 1  | 0  | 0  | 0  | 0  | 0  | 0  | 0  | 0  | 0 | 1  | 1   | 0  | 1  | 0  | 0  | 0  |



| Trial             | Arm               | Treatment | Year | se | sd | cr | th | cw | sr | sc | pi | re | ns | w | dt | ind | gp | ff | tg | he | ae |
|-------------------|-------------------|-----------|------|----|----|----|----|----|----|----|----|----|----|---|----|-----|----|----|----|----|----|
| Taylor2018        | CBTI              | CBT       | 2018 | 1  | 1  | 1  | 0  | 0  | 1  | 1  | 0  | 1  | 1  | 0 | 1  | 1   | 0  | 1  | 0  | 0  | 0  |
| Taylor2018        | Control           | PE        | 2018 | 0  | 1  | 0  | 0  | 0  | 0  | 0  | 0  | 0  | 0  | 0 | 1  | 1   | 0  | 1  | 0  | 0  | 0  |
| Ustinov2014       | Treatment         | BT        | 2013 | 1  | 1  | 0  | 0  | 0  | 0  | 1  | 0  | 1  | 1  | 0 | 1  | 0   | 1  | 1  | 0  | 0  | 0  |
| Ustinov2014       | Waitlist          | WL        | 2013 | 0  | 1  | 0  | 0  | 0  | 0  | 0  | 0  | 0  | 0  | 1 | 1  | 0   | 0  | 0  | 0  | 0  | 0  |
| VanDerZweerde2019 | i-Sleep           | CBT       | 2019 | 1  | 1  | 1  | 0  | 0  | 1  | 1  | 0  | 1  | 1  | 0 | 1  | 0   | 0  | 0  | 1  | 1  | 0  |
| VanDerZweerde2019 | Sdiary            | WL        | 2019 | 0  | 1  | 0  | 0  | 0  | 0  | 0  | 0  | 0  | 0  | 1 | 1  | 0   | 0  | 0  | 0  | 0  | 0  |
| VanDerZweerde2020 | i-Sleep           | CBT       | 2020 | 1  | 1  | 1  | 0  | 0  | 1  | 1  | 0  | 1  | 1  | 0 | 1  | 0   | 0  | 0  | 1  | 1  | 0  |
| VanDerZweerde2020 | CAU               | WL        | 2020 | 0  | 1  | 0  | 0  | 0  | 0  | 0  | 0  | 0  | 0  | 1 | 1  | 0   | 0  | 0  | 0  | 0  | 0  |
| VanStraten2014    | Intervention      | CBT       | 2014 | 1  | 1  | 1  | 0  | 0  | 1  | 1  | 0  | 1  | 1  | 0 | 1  | 0   | 0  | 0  | 1  | 1  | 0  |
| VanStraten2014    | Control           | WL        | 2014 | 0  | 1  | 0  | 0  | 0  | 0  | 0  | 0  | 0  | 0  | 1 | 1  | 0   | 0  | 0  | 0  | 0  | 0  |
| Vedaa2020         | dCBT-I            | CBT       | 2020 | 1  | 1  | 1  | 0  | 0  | 1  | 1  | 0  | 0  | 1  | 0 | 1  | 0   | 0  | 0  | 0  | 0  | 1  |
| Vedaa2020         | patient education | PE        | 2020 | 1  | 1  | 0  | 0  | 0  | 0  | 0  | 0  | 0  | 1  | 0 | 1  | 0   | 0  | 0  | 0  | 0  | 0  |
| Verma2022         | CBTI              | CBT       | 2022 | 1  | 1  | 1  | 0  | 0  | 0  | 1  | 0  | 1  | 1  | 0 | 0  | 0   | 0  | 0  | 1  | 1  | 0  |
| Verma2022         | TAU               | WL        | 2022 | 0  | 1  | 0  | 0  | 0  | 0  | 0  | 0  | 0  | 0  | 1 | 0  | 0   | 0  | 0  | 0  | 0  | 0  |
| Vincent2009       | Treatment         | CBT       | 2009 | 1  | 1  | 1  | 0  | 0  | 1  | 1  | 0  | 1  | 1  | 0 | 1  | 0   | 0  | 0  | 0  | 0  | 0  |
| Vincent2009       | Control           | WL        | 2009 | 0  | 1  | 0  | 0  | 0  | 0  | 0  | 0  | 0  | 0  | 1 | 1  | 0   | 0  | 0  | 0  | 0  | 0  |
| Vitiello2013      | CBT-PI            | BT        | 2013 | 1  | 1  | 0  | 0  | 0  | 1  | 1  | 0  | 1  | 1  | 0 | 1  | 0   | 1  | 1  | 0  | 0  | 0  |
| Vitiello2013      | CBT-P             | RT        | 2013 | 0  | 0  | 0  | 0  | 0  | 0  | 0  | 0  | 1  | 1  | 0 | 1  | 0   | 1  | 1  | 0  | 0  | 0  |
| Wagley2013        | Treatment         | CBT       | 2013 | 1  | 0  | 1  | 0  | 0  | 1  | 1  | 0  | 0  | 1  | 0 | 1  | 1   | 0  | 1  | 0  | 0  | 0  |
| Wagley2013        | Waitlist          | WL        | 2013 | 0  | 0  | 0  | 0  | 0  | 0  | 0  | 0  | 0  | 0  | 1 | 1  | 0   | 0  | 0  | 0  | 0  | 0  |
| Wang2016          | BBTI              | BT        | 2016 | 1  | 1  | 0  | 0  | 0  | 1  | 1  | 0  | 0  | 1  | 0 | 1  | 1   | 0  | 1  | 0  | 0  | 0  |
| Wang2016          | Sleep hygiene     | PE        | 2016 | 1  | 1  | 0  | 0  | 0  | 0  | 0  | 0  | 0  | 1  | 0 | 1  | 1   | 0  | 1  | 0  | 0  | 0  |
| Watanabe2011      | BBTI+TAU          | BT        | 2011 | 1  | 1  | 0  | 0  | 0  | 1  | 1  | 0  | 0  | 1  | 0 | 1  | 1   | 0  | 1  | 0  | 0  | 0  |
| Watanabe2011      | TAU               | PE        | 2011 | 1  | 0  | 0  | 0  | 0  | 0  | 0  | 0  | 0  | 1  | 0 | 1  | 1   | 0  | 1  | 0  | 0  | 0  |
| Watanabe2023      | CBT-I App         | CBT       | 2023 | 1  | 1  | 1  | 0  | 0  | 1  | 1  | 0  | 1  | 1  | 0 | 0  | 0   | 0  | 0  | 0  | 0  | 0  |
| Watanabe2023      | Sham App          | PLB       | 2023 | 0  | 0  | 0  | 0  | 0  | 0  | 0  | 0  | 0  | 1  | 0 | 0  | 0   | 0  | 0  | 0  | 0  | 0  |

| Trial            | Arm           | Treatment | Year | se | sd | cr | th | cw | sr | sc | pi | re | ns | w | dt | ind | gp | ff | tg | he | ae |
|------------------|---------------|-----------|------|----|----|----|----|----|----|----|----|----|----|---|----|-----|----|----|----|----|----|
| Wilkund2022      | ICBT-i        | BT        | 2022 | 1  | 1  | 0  | 0  | 0  | 1  | 1  | 0  | 0  | 1  | 0 | 1  | 0   | 0  | 0  | 1  | 1  | 0  |
| Wilkund2022      | AR            | RT        | 2022 | 0  | 1  | 0  | 0  | 0  | 0  | 0  | 0  | 1  | 1  | 0 | 1  | 0   | 0  | 0  | 1  | 1  | 0  |
| Woldeamanuel2021 | CCT-CI        | BT        | 2020 | 1  | 0  | 0  | 0  | 0  | 1  | 1  | 0  | 0  | 1  | 0 | 1  | 1   | 0  | 1  | 0  | 0  | 0  |
| Woldeamanuel2021 | HEAL          | TAU       | 2020 | 0  | 0  | 0  | 0  | 0  | 0  | 0  | 0  | 0  | 1  | 0 | 1  | 1   | 0  | 1  | 0  | 0  | 0  |
| Wong2016         | CT            | CBT       | 2016 | 1  | 1  | 1  | 0  | 1  | 1  | 0  | 0  | 0  | 1  | 0 | 0  | 1   | 0  | 1  | 0  | 0  | 0  |
| Wong2016         | MBT           | CBT       | 2016 | 1  | 1  | 1  | 1  | 1  | 1  | 0  | 0  | 0  | 1  | 0 | 0  | 1   | 0  | 1  | 0  | 0  | 0  |
| Wong2017         | PEEC          | BT        | 2017 | 1  | 1  | 0  | 0  | 0  | 0  | 1  | 0  | 0  | 1  | 0 | 1  | 0   | 1  | 1  | 0  | 0  | 0  |
| Wong2017         | MBCT-I        | CBT       | 2017 | 1  | 1  | 1  | 1  | 0  | 1  | 1  | 0  | 0  | 1  | 0 | 1  | 0   | 1  | 1  | 0  | 0  | 0  |
| Wong2021         | CBTI Workshop | CBT       | 2021 | 1  | 1  | 1  | 0  | 0  | 1  | 1  | 0  | 1  | 1  | 0 | 1  | 0   | 1  | 1  | 0  | 0  | 0  |
| Wong2021         | Selfhelp CBTI | CBT       | 2021 | 1  | 1  | 1  | 0  | 0  | 1  | 1  | 0  | 1  | 1  | 0 | 1  | 0   | 0  | 0  | 0  | 0  | 0  |
| Wong2021         | SHE           | PE        | 2021 | 1  | 1  | 0  | 0  | 0  | 0  | 0  | 0  | 0  | 1  | 0 | 1  | 0   | 1  | 1  | 0  | 0  | 0  |
| Wu2006           | Combined      | CBT       | 2006 | 1  | 1  | 1  | 0  | 0  | 1  | 1  | 0  | 0  | 1  | 0 | 1  | 1   | 0  | 1  | 0  | 0  | 0  |
| Wu2006           | PCT           | PE        | 2006 | 0  | 1  | 0  | 0  | 0  | 0  | 0  | 0  | 0  | 1  | 0 | 1  | 1   | 0  | 1  | 0  | 0  | 0  |
| Xing2020         | EA/CBT        | CBT       | 2020 | 1  | 1  | 1  | 1  | 0  | 1  | 1  | 0  | 1  | 1  | 0 | 1  | 1   | 1  | 1  | 0  | 0  | 0  |
| Xing2020         | EA            | TAU       | 2020 | 0  | 0  | 0  | 0  | 0  | 0  | 0  | 0  | 0  | 1  | 0 | 1  | 1   | 0  | 1  | 0  | 0  | 0  |
| Yamamoto2016     | Intervention  | BT        | 2016 | 1  | 0  | 0  | 0  | 0  | 1  | 1  | 0  | 1  | 1  | 0 | 0  | 1   | 1  | 1  | 0  | 0  | 0  |
| Yamamoto2016     | Control       | WL        | 2016 | 0  | 0  | 0  | 0  | 0  | 0  | 0  | 0  | 0  | 0  | 1 | 0  | 0   | 0  | 0  | 0  | 0  | 0  |
| Yang2022         | CBT-I         | CBT       | 2022 | 1  | 1  | 1  | 0  | 0  | 1  | 1  | 0  | 1  | 1  | 0 | 0  | 0   | 1  | 1  | 0  | 0  | 0  |
| Yang2022         | Control       | PE        | 2022 | 0  | 1  | 0  | 0  | 0  | 0  | 0  | 0  | 0  | 0  | 0 | 0  | 0   | 0  | 0  | 0  | 0  | 0  |
| Yang2023         | Self-help     | CBT       | 2023 | 1  | 1  | 1  | 1  | 0  | 1  | 0  | 0  | 1  | 1  | 0 | 1  | 0   | 0  | 0  | 0  | 0  | 0  |
| Yang2023         | Feedback      | CBT       | 2023 | 1  | 1  | 1  | 1  | 0  | 1  | 0  | 0  | 1  | 1  | 0 | 1  | 0   | 0  | 0  | 1  | 1  | 0  |
| Yang2023         | Waitlist      | WL        | 2023 | 0  | 0  | 0  | 0  | 0  | 0  | 0  | 0  | 0  | 0  | 1 | 1  | 0   | 0  | 0  | 0  | 0  | 0  |
| Zachariades2012  | Intervention  | CBT       | 2012 | 1  | 1  | 1  | 0  | 0  | 1  | 1  | 0  | 1  | 1  | 0 | 1  | 0   | 0  | 0  | 1  | 1  | 0  |
| Zachariades2012  | Control       | WL        | 2012 | 0  | 1  | 0  | 0  | 0  | 0  | 0  | 0  | 0  | 0  | 1 | 1  | 0   | 0  | 0  | 0  | 0  | 0  |
| Zachariae2018    | Intervention  | CBT       | 2018 | 1  | 1  | 1  | 0  | 0  | 1  | 1  | 0  | 0  | 1  | 0 | 1  | 0   | 0  | 0  | 0  | 0  | 1  |
| Zachariae2018    | Control       | WL        | 2018 | 0  | 1  | 0  | 0  | 0  | 0  | 0  | 0  | 0  | 0  | 1 | 1  | 0   | 0  | 0  | 0  | 0  | 0  |

| Trial      | Arm                     | Treatment | Year | se | sd | cr | th | cw | sr | sc | pi | re | ns | w | dt | ind | gp | ff | tg | he | ae |
|------------|-------------------------|-----------|------|----|----|----|----|----|----|----|----|----|----|---|----|-----|----|----|----|----|----|
| Zakiei2021 | Intervention            | CT        | 2021 | 0  | 1  | 0  | 1  | 0  | 0  | 0  | 0  | 0  | 1  | 0 | 0  | 0   | 1  | 1  | 0  | 0  | 0  |
| Zakiei2021 | Control                 | PLB       | 2021 | 0  | 0  | 0  | 0  | 0  | 0  | 0  | 0  | 0  | 1  | 0 | 0  | 0   | 1  | 1  | 0  | 0  | 0  |
| Zhang2015  | MBSR                    | CT        | 2015 | 0  | 0  | 0  | 1  | 0  | 0  | 0  | 0  | 0  | 1  | 0 | 1  | 0   | 1  | 1  | 0  | 0  | 0  |
| Zhang2015  | Wait-list               | WL        | 2015 | 0  | 0  | 0  | 0  | 0  | 0  | 0  | 0  | 0  | 0  | 1 | 1  | 0   | 0  | 0  | 0  | 0  | 0  |
| Zhang2019  | MBSR                    | CT        | 2019 | 0  | 1  | 0  | 1  | 0  | 0  | 0  | 0  | 0  | 1  | 0 | 1  | 0   | 1  | 1  | 0  | 0  | 0  |
| Zhang2019  | UC                      | PE        | 2019 | 0  | 1  | 0  | 0  | 0  | 0  | 0  | 0  | 0  | 0  | 0 | 1  | 0   | 0  | 0  | 0  | 0  | 0  |
| Zhang2023  | DCBT-I                  | CBT       | 2023 | 1  | 1  | 1  | 0  | 0  | 1  | 1  | 0  | 1  | 1  | 0 | 1  | 0   | 0  | 0  | 0  | 0  | 0  |
| Zhang2023  | Sleep education         | BT        | 2023 | 1  | 1  | 0  | 0  | 0  | 0  | 1  | 0  | 0  | 1  | 0 | 1  | 0   | 0  | 0  | 0  | 0  | 0  |
| Zhao2020   | MBCT-I                  | CT        | 2020 | 1  | 0  | 1  | 1  | 0  | 0  | 0  | 0  | 0  | 1  | 0 | 1  | 0   | 1  | 1  | 0  | 0  | 0  |
| Zhao2020   | Waitlist                | WL        | 2020 | 0  | 0  | 0  | 0  | 0  | 0  | 0  | 0  | 0  | 0  | 1 | 1  | 0   | 0  | 0  | 0  | 0  | 0  |
| Zhou2022a  | SHUTi-BWHS+SHUTi-normal | CBT       | 2022 | 1  | 1  | 1  | 0  | 0  | 1  | 1  | 0  | 0  | 1  | 0 | 1  | 0   | 0  | 0  | 0  | 0  | 1  |
| Zhou2022a  | Control                 | PE        | 2022 | 1  | 1  | 0  | 0  | 0  | 0  | 0  | 0  | 0  | 1  | 0 | 1  | 0   | 0  | 0  | 0  | 0  | 0  |
| Zhou2022b  | eCBT-I                  | CBT       | 2022 | 1  | 1  | 1  | 0  | 0  | 1  | 1  | 0  | 1  | 1  | 0 | 0  | 1   | 0  | 0  | 1  | 1  | 0  |
| Zhou2022b  | Control                 | NT        | 2022 | 0  | 0  | 0  | 0  | 0  | 0  | 0  | 0  | 0  | 0  | 0 | 0  | 0   | 0  | 0  | 0  | 0  | 0  |

### 3.3. Observed combinations of components and delivery formats

|                                    | se  | sd  | cr  | th | cw | sr  | sc  | pi | re  | ns  | w   | ind | gp  | ff  | tg | he | ae |
|------------------------------------|-----|-----|-----|----|----|-----|-----|----|-----|-----|-----|-----|-----|-----|----|----|----|
| Sleep hygiene education (se)       | 324 | 283 | 194 | 42 | 20 | 231 | 229 | 18 | 145 | 320 | 15  | 167 | 73  | 202 | 34 | 39 | 36 |
| Sleep diary (sd)                   |     | 433 | 187 | 47 | 21 | 226 | 231 | 19 | 154 | 359 | 76  | 193 | 80  | 236 | 39 | 48 | 38 |
| Cognitive restructuring (cr)       |     |     | 203 | 35 | 20 | 193 | 188 | 18 | 133 | 203 | 2   | 89  | 51  | 116 | 32 | 36 | 28 |
| Third wave components (th)         |     |     |     | 58 | 7  | 37  | 35  | 9  | 37  | 58  | 3   | 16  | 20  | 30  | 7  | 12 | 13 |
| Constructive worry (cw)            |     |     |     |    | 21 | 21  | 19  | 4  | 14  | 21  | 1   | 12  | 4   | 12  | 3  | 2  | 1  |
| Sleep restriction (sr)             |     |     |     |    |    | 244 | 228 | 17 | 139 | 244 | 2   | 124 | 58  | 152 | 34 | 37 | 32 |
| Stimulus control (sc)              |     |     |     |    |    |     | 249 | 17 | 146 | 249 | 2   | 124 | 60  | 157 | 32 | 36 | 32 |
| Paradoxical intention (pi)         |     |     |     |    |    |     |     | 20 | 18  | 18  | 1   | 5   | 3   | 6   | 1  | 6  | 7  |
| Relaxation (re)                    |     |     |     |    |    |     |     |    | 174 | 174 | 3   | 69  | 49  | 100 | 27 | 33 | 21 |
| Non-specific treatment effect (ns) |     |     |     |    |    |     |     |    |     | 423 | 22  | 224 | 99  | 283 | 39 | 46 | 39 |
| Waiting component (w)              |     |     |     |    |    |     |     |    |     |     | 102 | 11  | 5   | 15  | 0  | 0  | 3  |
| Individual (ind)                   |     |     |     |    |    |     |     |    |     |     |     | 228 | 20  | 209 | 4  | 4  | 0  |
| Group (gp)                         |     |     |     |    |    |     |     |    |     |     |     |     | 100 | 97  | 1  | 1  | 0  |
| Face-to-face (ff)                  |     |     |     |    |    |     |     |    |     |     |     |     |     | 287 | 2  | 2  | 0  |
| Online therapeutic guidance (tg)   |     |     |     |    |    |     |     |    |     |     |     |     |     |     | 39 | 34 | 5  |
| Human encouragement (he)           |     |     |     |    |    |     |     |    |     |     |     |     |     |     |    | 49 | 9  |
| Automatic encouragement (ae)       |     |     |     |    |    |     |     |    |     |     |     |     |     |     |    |    | 41 |

The diagonal cells indicate the total number of arms that contained the component in question. The cells in the upper-right corner shows the number of arms that contained the combinations of components shown in the column and the raw.

**eTable 4. League table for treatment-level network meta-analysis**

|                         |                        |                        |                        |                        |                         |                         |                         |                         |
|-------------------------|------------------------|------------------------|------------------------|------------------------|-------------------------|-------------------------|-------------------------|-------------------------|
| CBT                     | 1.76<br>(1.00 to 3.10) | 2.36<br>(1.15 to 4.87) | 2.96<br>(1.68 to 5.23) | 3.74<br>(1.96 to 7.14) | 3.17<br>(1.44 to 6.97)  | 3.54<br>(2.96 to 4.22)  | 6.30<br>(2.14 to 18.54) | 6.01<br>(4.83 to 7.49)  |
| 1.52<br>(1.18 to 1.95)  | BT                     | 1.31<br>(0.57 to 3.03) | 1.58<br>(0.60 to 4.16) | 2.58<br>(1.18 to 5.64) | .                       | 3.49<br>(2.37 to 5.15)  | .                       | 3.01<br>(2.09 to 4.33)  |
| 1.52<br>(0.98 to 2.36)  | 1.00<br>(0.63 to 1.60) | CT                     | .                      | 1.20<br>(0.18 to 7.94) | 8.80<br>(0.85 to 90.84) | 3.56<br>(1.18 to 10.73) | 3.32<br>(1.01 to 10.88) | 8.31<br>(3.36 to 20.53) |
| 2.70<br>(1.65 to 4.40)  | 1.78<br>(1.06 to 2.99) | 1.77<br>(0.93 to 3.40) | TAU                    | .                      | .                       | 4.50<br>(0.51 to 39.94) | .                       | .                       |
| 2.97<br>(1.97 to 4.46)  | 1.95<br>(1.27 to 3.01) | 1.95<br>(1.10 to 3.46) | 1.10<br>(0.59 to 2.06) | RT                     | .                       | 1.92<br>(0.84 to 4.37)  | .                       | 2.21<br>(0.87 to 5.60)  |
| 3.67<br>(1.74 to 7.75)  | 2.42<br>(1.10 to 5.31) | 2.42<br>(1.04 to 5.62) | 1.36<br>(0.56 to 3.33) | 1.24<br>(0.53 to 2.90) | NT                      | .                       | .                       | .                       |
| 3.79<br>(3.21 to 4.47)  | 2.50<br>(1.93 to 3.24) | 2.49<br>(1.59 to 3.92) | 1.40<br>(0.84 to 2.34) | 1.28<br>(0.84 to 1.95) | 1.03<br>(0.48 to 2.22)  | PE                      | .                       | 4.30<br>(1.01 to 18.27) |
| 5.70<br>(2.51 to 12.97) | 3.76<br>(1.61 to 8.79) | 3.75<br>(1.63 to 8.63) | 2.11<br>(0.81 to 5.50) | 1.92<br>(0.77 to 4.78) | 1.55<br>(0.52 to 4.68)  | 1.51<br>(0.65 to 3.47)  | PLB                     | .                       |
| 5.74<br>(4.72 to 6.98)  | 3.78<br>(2.92 to 4.91) | 3.78<br>(2.39 to 5.96) | 2.13<br>(1.27 to 3.58) | 1.94<br>(1.26 to 2.96) | 1.56<br>(0.72 to 3.38)  | 1.51<br>(1.19 to 1.93)  | 1.01<br>(0.43 to 2.33)  | WL                      |

Odds ratio (95%CI) of remission at post-treatment of the upper-left-defined treatment against down-right-defined treatment.

BT = behavioral therapy; CBT = cognitive behavioral therapy; CT = cognitive therapy; NT = no treatment; PE = psychoeducation; PLB = attention placebo; RT = relaxation therapy; TAU = treatment as usual; WL = waiting list.

**eTable 5. CINeMA**

Within-study bias: We used the majority RoB2 assessment.

Reporting bias: Low.

Indirectness: No concerns.

Imprecision, heterogeneity, incoherence: We used OR=1.5 as the clinically meaningful threshold.

| Comparison | N  | Within-study bias | Reporting bias | Indirectness | Imprecision    | Heterogeneity  | Incoherence   | Confidence rating | Reason(s) for downgrading                             |
|------------|----|-------------------|----------------|--------------|----------------|----------------|---------------|-------------------|-------------------------------------------------------|
| BT:CBT     | 8  | Some concerns     | Low risk       | No concerns  | No concerns    | Major concerns | No concerns   | Low               | ["Within-study bias", "Heterogeneity"]                |
| BT:CT      | 2  | Some concerns     | Low risk       | No concerns  | Major concerns | No concerns    | No concerns   | Low               | ["Within-study bias", "Imprecision"]                  |
| BT:NT      | 1  | Some concerns     | Low risk       | No concerns  | Some concerns  | Some concerns  | No concerns   | Moderate          | ["Within-study bias", "Imprecision", "Heterogeneity"] |
| BT:PE      | 25 | Some concerns     | Low risk       | No concerns  | No concerns    | Some concerns  | Some concerns | Moderate          | ["Within-study bias", "Heterogeneity", "Incoherence"] |
| BT:RT      | 4  | Some concerns     | Low risk       | No concerns  | No concerns    | Some concerns  | No concerns   | Moderate          | ["Within-study bias", "Heterogeneity"]                |
| BT:TAU     | 2  | Some concerns     | Low risk       | No concerns  | No concerns    | Major concerns | No concerns   | Low               | ["Within-study bias", "Heterogeneity"]                |
| BT:WL      | 22 | Some concerns     | Low risk       | No concerns  | No concerns    | No concerns    | No concerns   | Moderate          | ["Within-study bias"]                                 |
| CBT:CT     | 6  | Some concerns     | Low risk       | No concerns  | Some concerns  | Some concerns  | No concerns   | Moderate          | ["Within-study bias", "Imprecision", "Heterogeneity"] |
| CBT:NT     | 2  | Some concerns     | Low risk       | No concerns  | No concerns    | Some concerns  | No concerns   | Moderate          | ["Within-study bias", "Heterogeneity"]                |
| CBT:PE     | 76 | Some concerns     | Low risk       | No concerns  | No concerns    | No concerns    | No concerns   | Moderate          | ["Within-study bias"]                                 |
| CBT:PLB    | 3  | Some concerns     | Low risk       | No concerns  | No concerns    | No concerns    | No concerns   | Moderate          | ["Within-study bias"]                                 |
| CBT:RT     | 5  | Some concerns     | Low risk       | No concerns  | No concerns    | No concerns    | No concerns   | Moderate          | ["Within-study bias"]                                 |
| CBT:TAU    | 6  | Some concerns     | Low risk       | No concerns  | No concerns    | Some concerns  | No concerns   | Moderate          | ["Within-study bias", "Heterogeneity"]                |
| CBT:WL     | 68 | Some concerns     | Low risk       | No concerns  | No concerns    | No concerns    | No concerns   | Moderate          | ["Within-study bias"]                                 |
| CT:NT      | 1  | Some concerns     | Low risk       | No concerns  | Some concerns  | Some concerns  | No concerns   | Moderate          | ["Within-study bias", "Imprecision", "Heterogeneity"] |

|         |   |               |          |             |                |                |             |          |                                                       |
|---------|---|---------------|----------|-------------|----------------|----------------|-------------|----------|-------------------------------------------------------|
| CT:PE   | 3 | Some concerns | Low risk | No concerns | No concerns    | Some concerns  | No concerns | Moderate | ["Within-study bias", "Heterogeneity"]                |
| CT:PLB  | 2 | Some concerns | Low risk | No concerns | No concerns    | No concerns    | No concerns | Moderate | ["Within-study bias"]                                 |
| CT:RT   | 1 | Some concerns | Low risk | No concerns | No concerns    | Major concerns | No concerns | Low      | ["Within-study bias", "Heterogeneity"]                |
| CT:WL   | 5 | Some concerns | Low risk | No concerns | No concerns    | No concerns    | No concerns | Moderate | ["Within-study bias"]                                 |
| PE:RT   | 5 | Some concerns | Low risk | No concerns | Some concerns  | Some concerns  | No concerns | Moderate | ["Within-study bias", "Imprecision", "Heterogeneity"] |
| PE:TAU  | 1 | Some concerns | Low risk | No concerns | Some concerns  | Some concerns  | No concerns | Moderate | ["Within-study bias", "Imprecision", "Heterogeneity"] |
| PE:WL   | 3 | Some concerns | Low risk | No concerns | No concerns    | Major concerns | No concerns | Low      | ["Within-study bias", "Heterogeneity"]                |
| RT:WL   | 5 | Some concerns | Low risk | No concerns | No concerns    | Some concerns  | No concerns | Moderate | ["Within-study bias", "Heterogeneity"]                |
| BT:PLB  | 0 | Some concerns | Low risk | No concerns | No concerns    | No concerns    | No concerns | Very low | No direct evidence                                    |
| CT:TAU  | 0 | Some concerns | Low risk | No concerns | Some concerns  | Some concerns  | No concerns | Very low | No direct evidence                                    |
| NT:PE   | 0 | Some concerns | Low risk | No concerns | Major concerns | No concerns    | No concerns | Very low | No direct evidence                                    |
| NT:PLB  | 0 | Some concerns | Low risk | No concerns | Major concerns | No concerns    | No concerns | Very low | No direct evidence                                    |
| NT:RT   | 0 | Some concerns | Low risk | No concerns | Major concerns | No concerns    | No concerns | Very low | No direct evidence                                    |
| NT:TAU  | 0 | Some concerns | Low risk | No concerns | Major concerns | No concerns    | No concerns | Very low | No direct evidence                                    |
| NT:WL   | 0 | Some concerns | Low risk | No concerns | Some concerns  | Some concerns  | No concerns | Very low | No direct evidence                                    |
| PE:PLB  | 0 | Some concerns | Low risk | No concerns | Major concerns | No concerns    | No concerns | Very low | No direct evidence                                    |
| PLB:RT  | 0 | Some concerns | Low risk | No concerns | Some concerns  | Some concerns  | No concerns | Very low | No direct evidence                                    |
| PLB:TAU | 0 | Some concerns | Low risk | No concerns | Some concerns  | Some concerns  | No concerns | Very low | No direct evidence                                    |
| PLB:WL  | 0 | Some concerns | Low risk | No concerns | Major concerns | No concerns    | No concerns | Very low | No direct evidence                                    |
| RT:TAU  | 0 | Some concerns | Low risk | No concerns | Major concerns | No concerns    | No concerns | Very low | No direct evidence                                    |
| TAU:WL  | 0 | Some concerns | Low risk | No concerns | No concerns    | Some concerns  | No concerns | Very low | No direct evidence                                    |

eTable 6. PRISMA-NMA

| Section/Topic       | Item # | Checklist Item                                                                                                                                                                                                                                                                                                                                                                                                                                                                                                                                                                                                                                                                                                                                                                          | Reported on Page # |
|---------------------|--------|-----------------------------------------------------------------------------------------------------------------------------------------------------------------------------------------------------------------------------------------------------------------------------------------------------------------------------------------------------------------------------------------------------------------------------------------------------------------------------------------------------------------------------------------------------------------------------------------------------------------------------------------------------------------------------------------------------------------------------------------------------------------------------------------|--------------------|
| <b>TITLE</b>        |        |                                                                                                                                                                                                                                                                                                                                                                                                                                                                                                                                                                                                                                                                                                                                                                                         |                    |
| Title               | 1      | Identify the report as a systematic review <i>incorporating a network meta-analysis (or related form of meta-analysis)</i> .                                                                                                                                                                                                                                                                                                                                                                                                                                                                                                                                                                                                                                                            | P1                 |
| <b>ABSTRACT</b>     |        |                                                                                                                                                                                                                                                                                                                                                                                                                                                                                                                                                                                                                                                                                                                                                                                         |                    |
| Structured summary  | 2      | Provide a structured summary including, as applicable:<br><b>Background:</b> main objectives<br><b>Methods:</b> data sources; study eligibility criteria, participants, and interventions; study appraisal; and <i>synthesis methods, such as network meta-analysis</i> .<br><b>Results:</b> number of studies and participants identified; summary estimates with corresponding confidence/credible intervals; <i>treatment rankings may also be discussed. Authors may choose to summarize pairwise comparisons against a chosen treatment included in their analyses for brevity.</i><br><b>Discussion/Conclusions:</b> limitations; conclusions and implications of findings.<br><b>Other:</b> primary source of funding; systematic review registration number with registry name. | P5                 |
| <b>INTRODUCTION</b> |        |                                                                                                                                                                                                                                                                                                                                                                                                                                                                                                                                                                                                                                                                                                                                                                                         |                    |
| Rationale           | 3      | Describe the rationale for the review in the context of what is already known, <i>including mention of why a network meta-analysis has been conducted.</i>                                                                                                                                                                                                                                                                                                                                                                                                                                                                                                                                                                                                                              | P6                 |
| Objectives          | 4      | Provide an explicit statement of questions being addressed, with reference to participants, interventions, comparisons, outcomes, and study design (PICOS).                                                                                                                                                                                                                                                                                                                                                                                                                                                                                                                                                                                                                             | P6-7               |
| <b>METHODS</b>      |        |                                                                                                                                                                                                                                                                                                                                                                                                                                                                                                                                                                                                                                                                                                                                                                                         |                    |



|                                        |           |                                                                                                                                                                                                                                                                                                                                                                                   |                   |
|----------------------------------------|-----------|-----------------------------------------------------------------------------------------------------------------------------------------------------------------------------------------------------------------------------------------------------------------------------------------------------------------------------------------------------------------------------------|-------------------|
| Protocol and registration              | 5         | Indicate whether a review protocol exists and if and where it can be accessed (e.g., Web address); and, if available, provide registration information, including registration number.                                                                                                                                                                                            | P6, appendix      |
| Eligibility criteria                   | 6         | Specify study characteristics (e.g., PICOS, length of follow-up) and report characteristics (e.g., years considered, language, publication status) used as criteria for eligibility, giving rationale. <i>Clearly describe eligible treatments included in the treatment network, and note whether any have been clustered or merged into the same node (with justification).</i> | P6-7              |
| Information sources                    | 7         | Describe all information sources (e.g., databases with dates of coverage, contact with study authors to identify additional studies) in the search and date last searched.                                                                                                                                                                                                        | P7                |
| Search                                 | 8         | Present full electronic search strategy for at least one database, including any limits used, such that it could be repeated.                                                                                                                                                                                                                                                     | Appendix          |
| Study selection                        | 9         | State the process for selecting studies (i.e., screening, eligibility, included in systematic review, and, if applicable, included in the meta-analysis).                                                                                                                                                                                                                         | P8, Appendix      |
| Data collection process                | 10        | Describe method of data extraction from reports (e.g., piloted forms, independently, in duplicate) and any processes for obtaining and confirming data from investigators.                                                                                                                                                                                                        | P7                |
| Data items                             | 11        | List and define all variables for which data were sought (e.g., PICOS, funding sources) and any assumptions and simplifications made.                                                                                                                                                                                                                                             | Appendix          |
| <b>Geometry of the network</b>         | <b>S1</b> | Describe methods used to explore the geometry of the treatment network under study and potential biases related to it. This should include how the evidence base has been graphically summarized for presentation, and what characteristics were compiled and used to describe the evidence base to readers.                                                                      | Figure1, Appendix |
| Risk of bias within individual studies | 12        | Describe methods used for assessing risk of bias of individual studies (including specification of whether this was done at the study or outcome level), and how this information is to be used in any data synthesis.                                                                                                                                                            | P8-9, Appendix    |
| Summary measures                       | 13        | State the principal summary measures (e.g., risk ratio, difference in means). <i>Also describe the use of additional summary measures assessed, such as treatment rankings and surface under the cumulative ranking curve (SUCRA) values, as well as modified approaches used to present summary findings from meta-analyses.</i>                                                 | P9                |

|                                          |           |                                                                                                                                                                                                                                                                                                                                                                                                                                                   |          |
|------------------------------------------|-----------|---------------------------------------------------------------------------------------------------------------------------------------------------------------------------------------------------------------------------------------------------------------------------------------------------------------------------------------------------------------------------------------------------------------------------------------------------|----------|
| Planned methods of analysis              | 14        | Describe the methods of handling data and combining results of studies for each network meta-analysis. This should include, but not be limited to: <ul style="list-style-type: none"> <li>• <i>Handling of multi-arm trials;</i></li> <li>• <i>Selection of variance structure;</i></li> <li>• <i>Selection of prior distributions in Bayesian analyses; and</i></li> <li>• <i>Assessment of model fit.</i></li> </ul>                            | P9       |
| <b>Assessment of Inconsistency</b>       | <b>S2</b> | Describe the statistical methods used to evaluate the agreement of direct and indirect evidence in the treatment network(s) studied. Describe efforts taken to address its presence when found.                                                                                                                                                                                                                                                   | P9       |
| Risk of bias across studies              | 15        | Specify any assessment of risk of bias that may affect the cumulative evidence (e.g., publication bias, selective reporting within studies).                                                                                                                                                                                                                                                                                                      | P8       |
| Additional analyses                      | 16        | Describe methods of additional analyses if done, indicating which were pre-specified. This may include, but not be limited to, the following: <ul style="list-style-type: none"> <li>• Sensitivity or subgroup analyses;</li> <li>• Meta-regression analyses;</li> <li>• <i>Alternative formulations of the treatment network; and</i></li> <li>• <i>Use of alternative prior distributions for Bayesian analyses (if applicable).</i></li> </ul> | P9       |
| <b>RESULTS†</b>                          |           |                                                                                                                                                                                                                                                                                                                                                                                                                                                   |          |
| Study selection                          | 17        | Give numbers of studies screened, assessed for eligibility, and included in the review, with reasons for exclusions at each stage, ideally with a flow diagram.                                                                                                                                                                                                                                                                                   | Appendix |
| <b>Presentation of network structure</b> | <b>S3</b> | Provide a network graph of the included studies to enable visualization of the geometry of the treatment network.                                                                                                                                                                                                                                                                                                                                 | Figure1  |

|                                      |           |                                                                                                                                                                                                                                                                                                                                                                                                                                                              |                            |
|--------------------------------------|-----------|--------------------------------------------------------------------------------------------------------------------------------------------------------------------------------------------------------------------------------------------------------------------------------------------------------------------------------------------------------------------------------------------------------------------------------------------------------------|----------------------------|
| <b>Summary of network geometry</b>   | <b>S4</b> | Provide a brief overview of characteristics of the treatment network. This may include commentary on the abundance of trials and randomized patients for the different interventions and pairwise comparisons in the network, gaps of evidence in the treatment network, and potential biases reflected by the network structure.                                                                                                                            | P9-10, Figure1             |
| Study characteristics                | 18        | For each study, present characteristics for which data were extracted (e.g., study size, PICOS, follow-up period) and provide the citations.                                                                                                                                                                                                                                                                                                                 | Appendix                   |
| Risk of bias within studies          | 19        | Present data on risk of bias of each study and, if available, any outcome level assessment.                                                                                                                                                                                                                                                                                                                                                                  | Appendix                   |
| Results of individual studies        | 20        | For all outcomes considered (benefits or harms), present, for each study: 1) simple summary data for each intervention group, and 2) effect estimates and confidence intervals. <i>Modified approaches may be needed to deal with information from larger networks.</i>                                                                                                                                                                                      | <b>Appendix</b>            |
| Synthesis of results                 | 21        | Present results of each meta-analysis done, including confidence/credible intervals. <i>In larger networks, authors may focus on comparisons versus a particular comparator (e.g. placebo or standard care), with full findings presented in an appendix. League tables and forest plots may be considered to summarize pairwise comparisons.</i> If additional summary measures were explored (such as treatment rankings), these should also be presented. | Figure2, Figure3, Appendix |
| <b>Exploration for inconsistency</b> | <b>S5</b> | Describe results from investigations of inconsistency. This may include such information as measures of model fit to compare consistency and inconsistency models, <i>P</i> values from statistical tests, or summary of inconsistency estimates from different parts of the treatment network.                                                                                                                                                              | Appendix                   |
| Risk of bias across studies          | 22        | Present results of any assessment of risk of bias across studies for the evidence base being studied.                                                                                                                                                                                                                                                                                                                                                        | Appendix<br>CINeMA         |
| Results of additional analyses       | 23        | Give results of additional analyses, if done (e.g., sensitivity or subgroup analyses, meta-regression analyses, <i>alternative network geometries studied, alternative choice of prior distributions for Bayesian analyses,</i> and so forth).                                                                                                                                                                                                               | Appendix                   |
| <b>DISCUSSION</b>                    |           |                                                                                                                                                                                                                                                                                                                                                                                                                                                              |                            |
| Summary of evidence                  | 24        | Summarize the main findings, including the strength of evidence for each main outcome; consider their relevance to key groups (e.g., healthcare providers, users, and policy-makers).                                                                                                                                                                                                                                                                        | P11-13                     |

|                |    |                                                                                                                                                                                                                                                                                                                                                                                                                                |          |
|----------------|----|--------------------------------------------------------------------------------------------------------------------------------------------------------------------------------------------------------------------------------------------------------------------------------------------------------------------------------------------------------------------------------------------------------------------------------|----------|
| Limitations    | 25 | Discuss limitations at study and outcome level (e.g., risk of bias), and at review level (e.g., incomplete retrieval of identified research, reporting bias). <i>Comment on the validity of the assumptions, such as transitivity and consistency. Comment on any concerns regarding network geometry (e.g., avoidance of certain comparisons).</i>                                                                            | P12-13   |
| Conclusions    | 26 | Provide a general interpretation of the results in the context of other evidence, and implications for future research.                                                                                                                                                                                                                                                                                                        | P13      |
| <b>FUNDING</b> |    |                                                                                                                                                                                                                                                                                                                                                                                                                                |          |
| Funding        | 27 | Describe sources of funding for the systematic review and other support (e.g., supply of data); role of funders for the systematic review. This should also include information regarding whether funding has been received from manufacturers of treatments in the network and/or whether some of the authors are content experts with professional conflicts of interest that could affect use of treatments in the network. | <b>Y</b> |

eFigure 1. Screening process and results

1.1. Flow diagram 2022 initial review

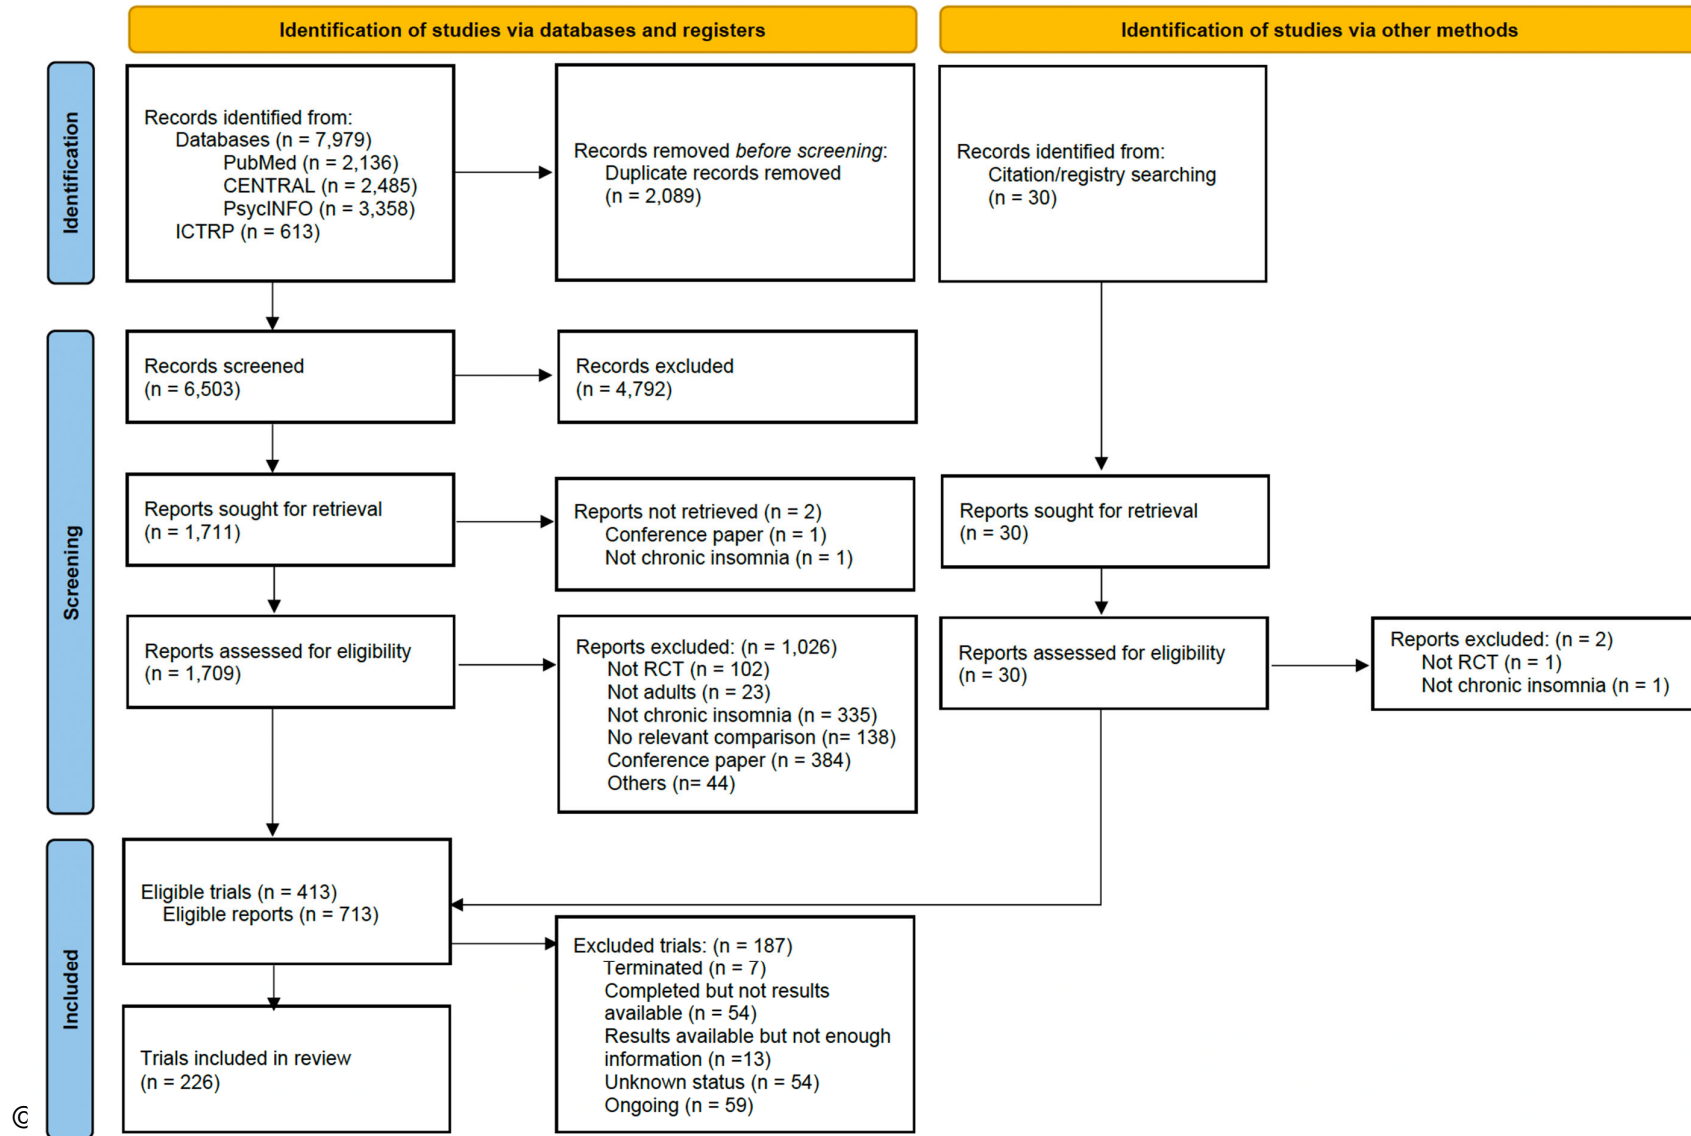

## 1.2. Flow diagram 2023 update

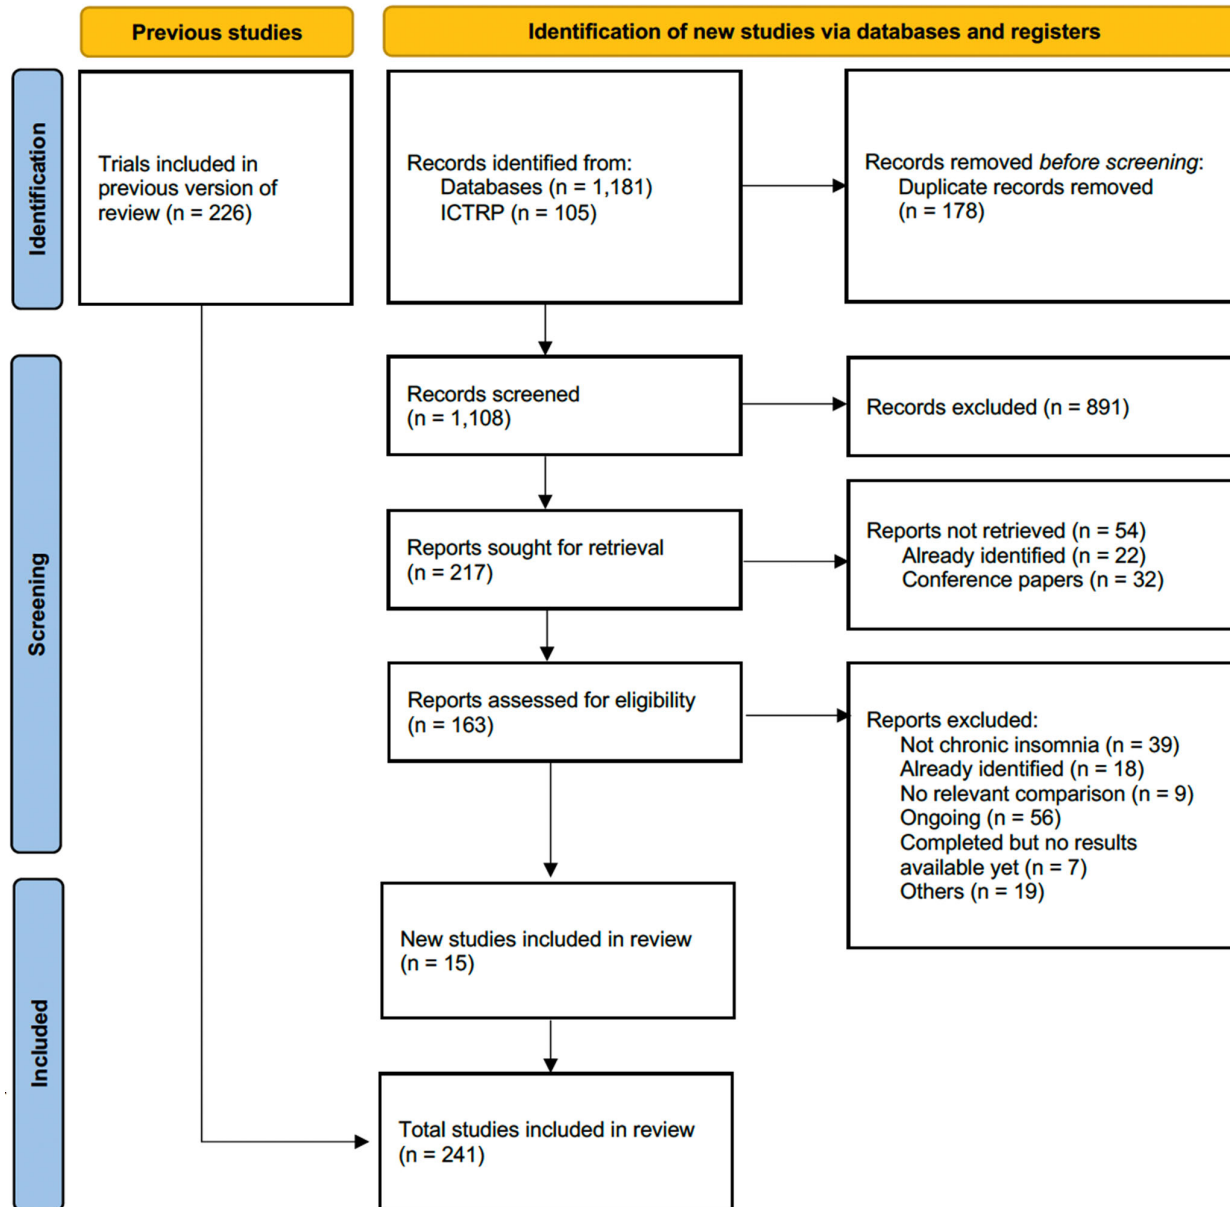

eFigure 2. Assessment of transitivity

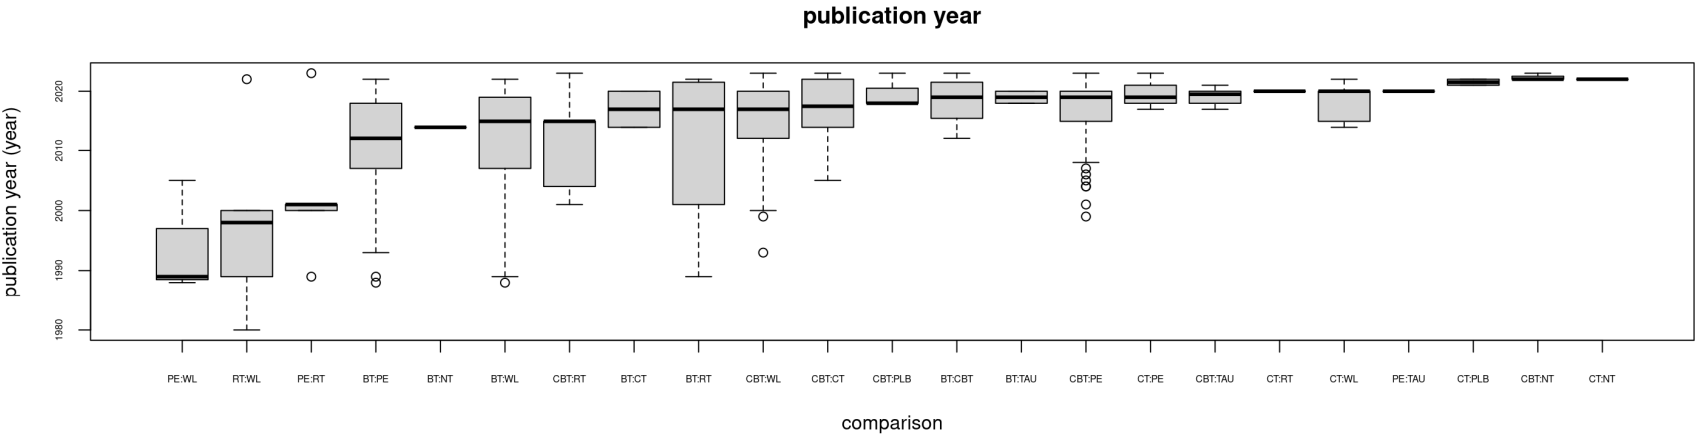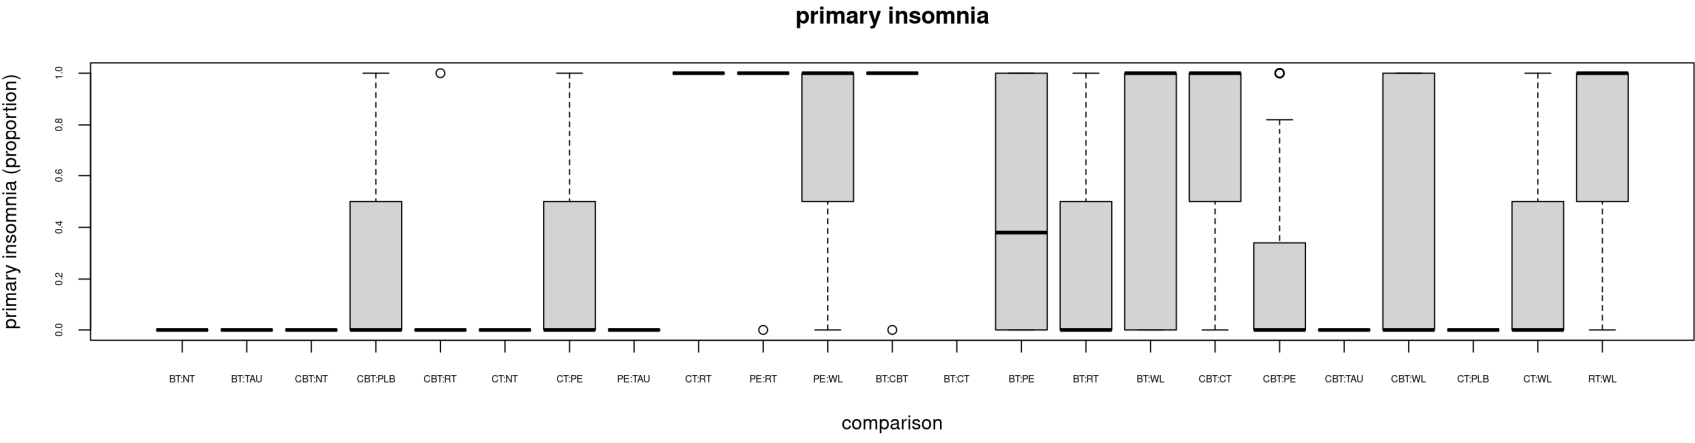

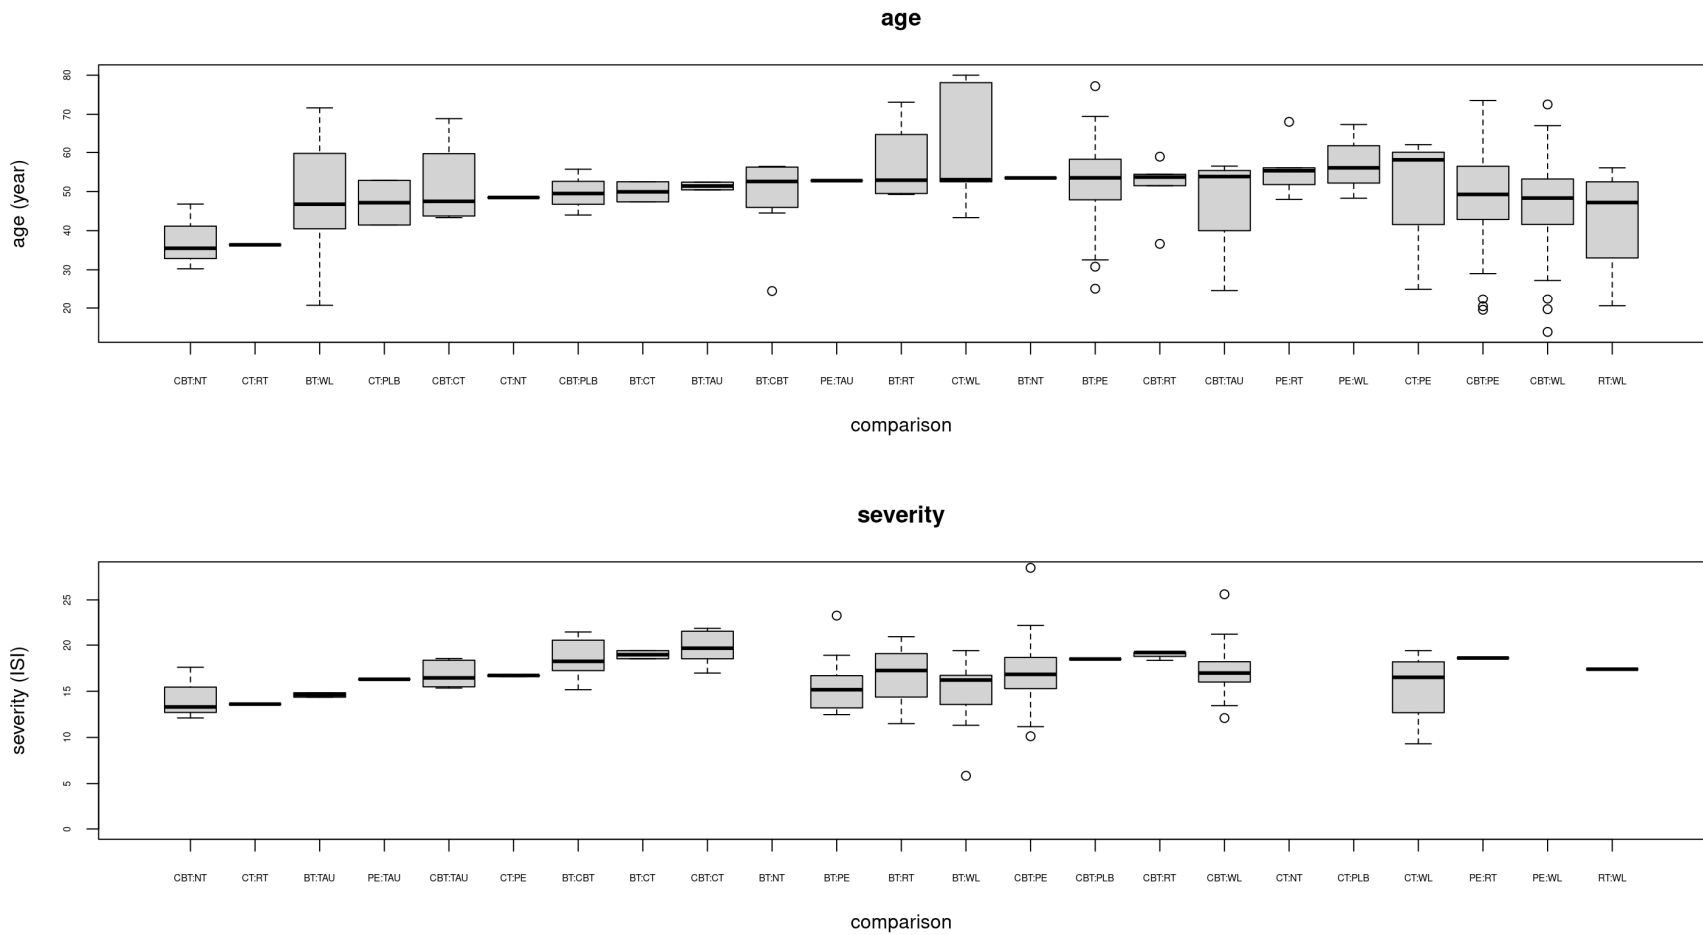

BT = behavioral therapy; CBT = cognitive behavioral therapy; CT = cognitive therapy; ISI = insomnia severity index; NT = no treatment; PE = psychoeducation; PLB = attention placebo; RT = relaxation therapy; TAU = treatment as usual; WL = waiting list.



**eFigure 3. Prediction intervals**

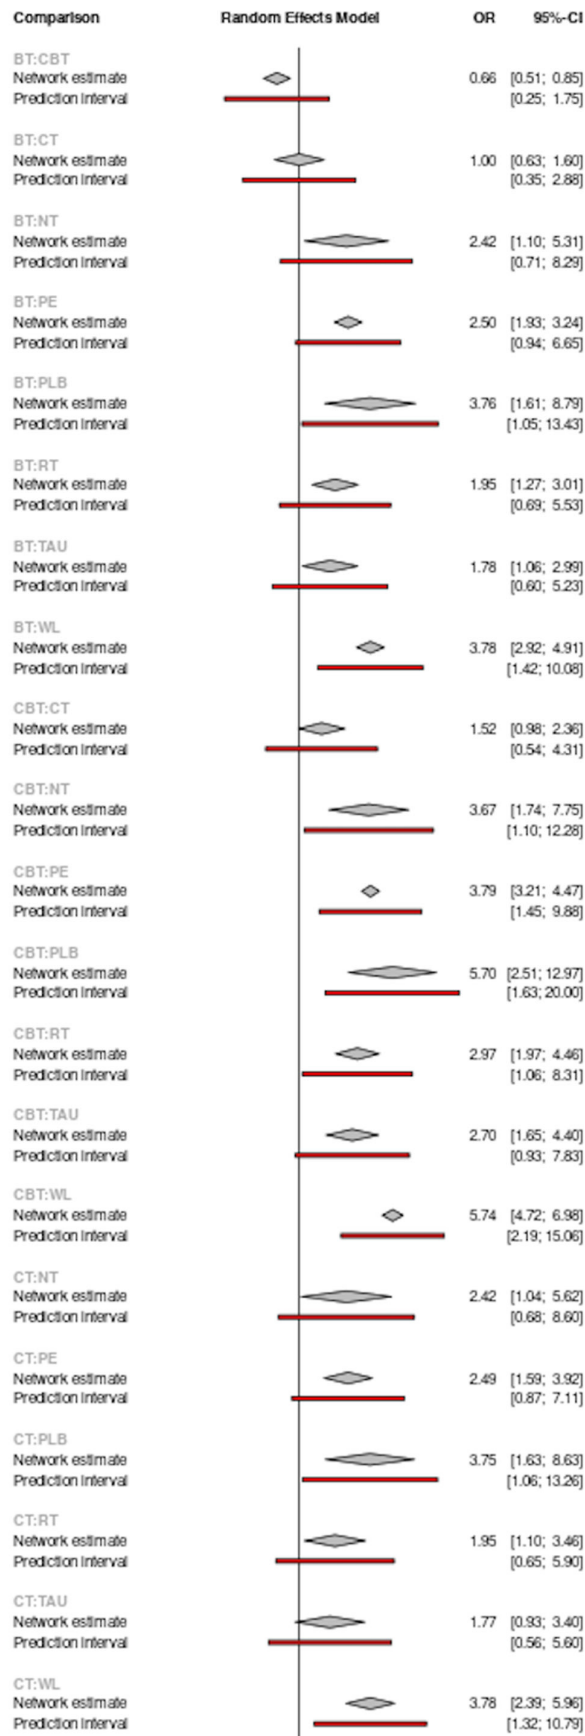

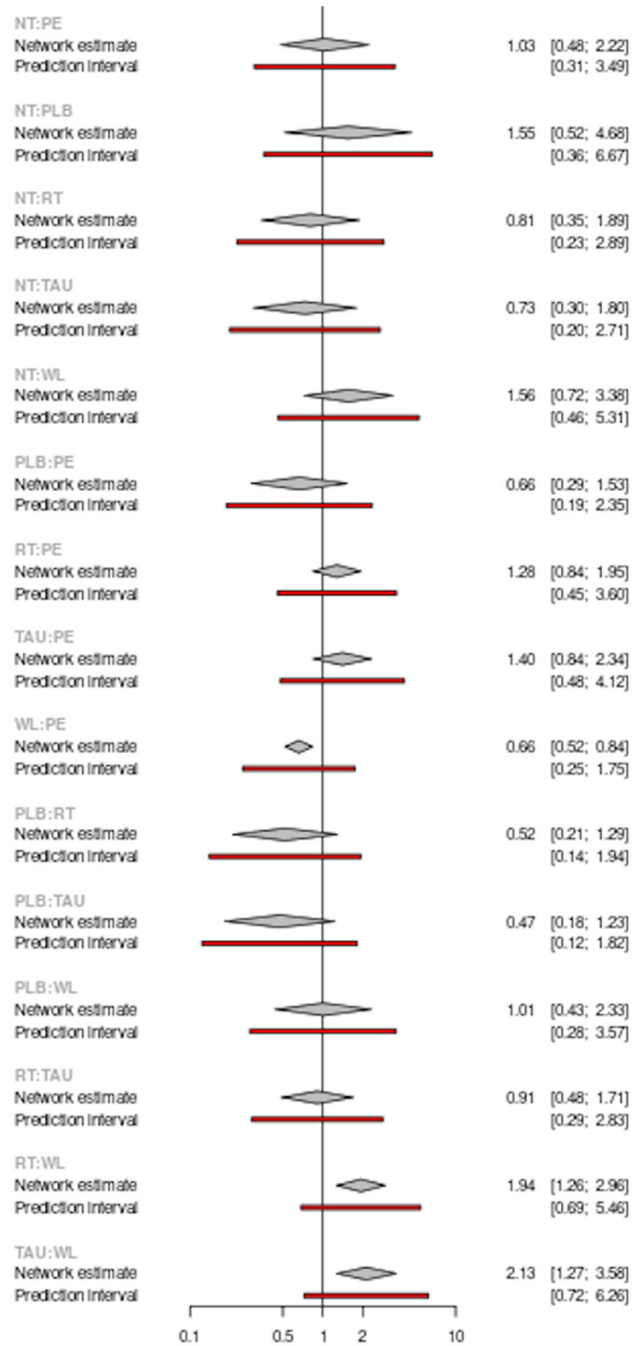

eFigure 4. Assessment of publication bias and small study effects

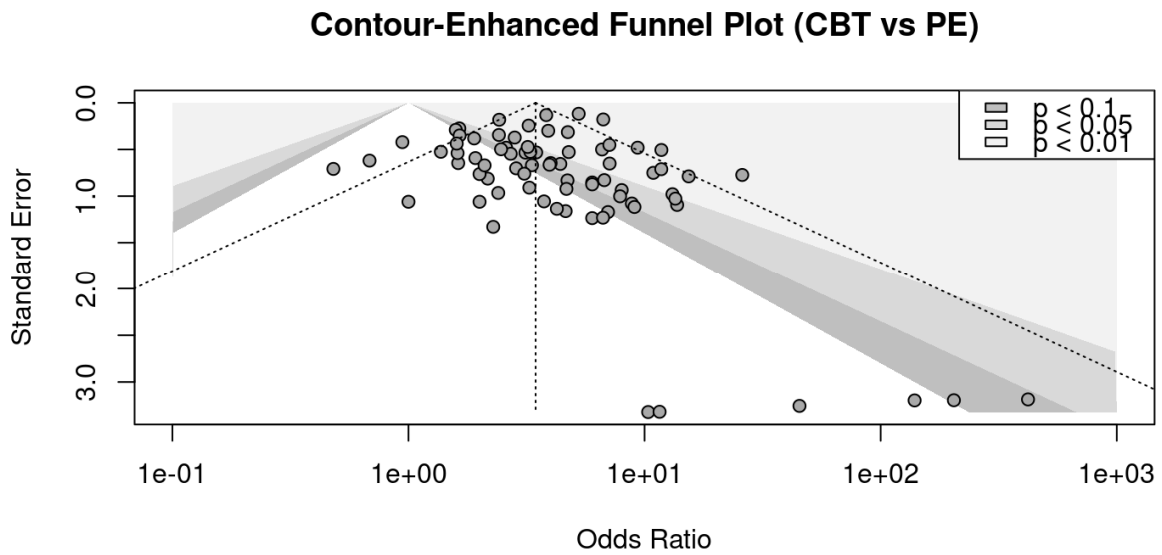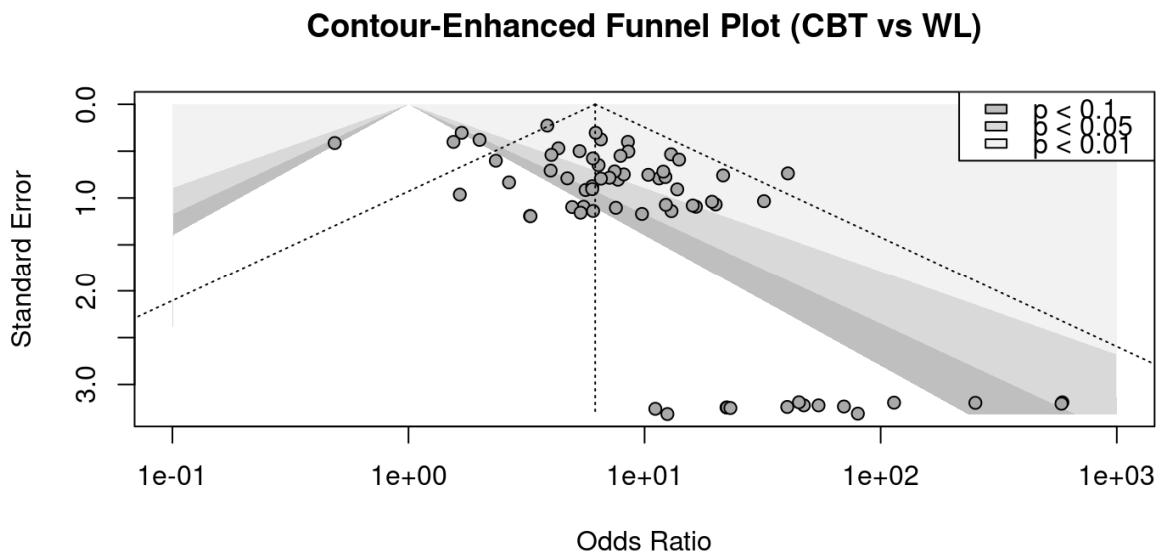

**Contour-Enhanced Funnel Plot (BT vs PE)**

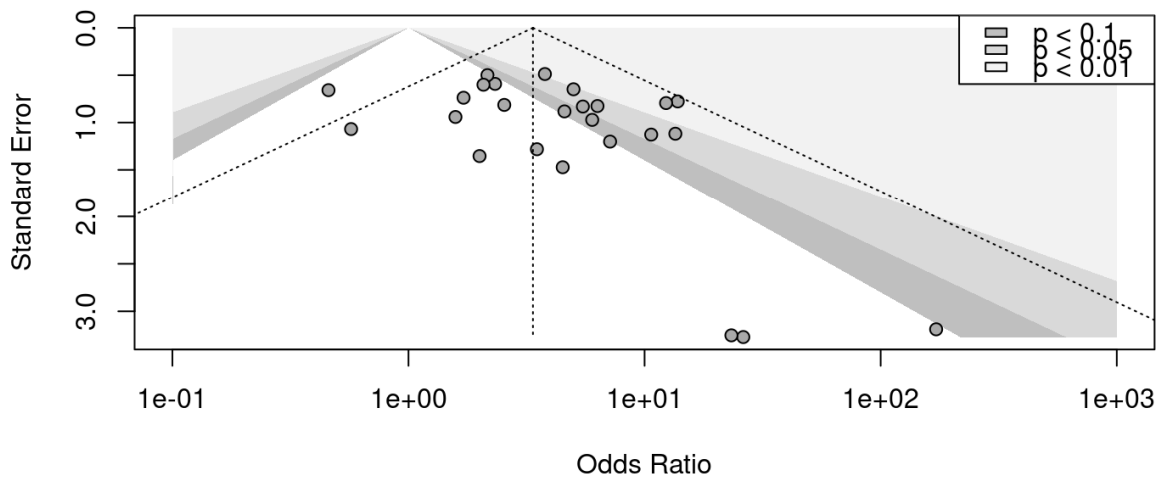

**Contour-Enhanced Funnel Plot (BT vs WL)**

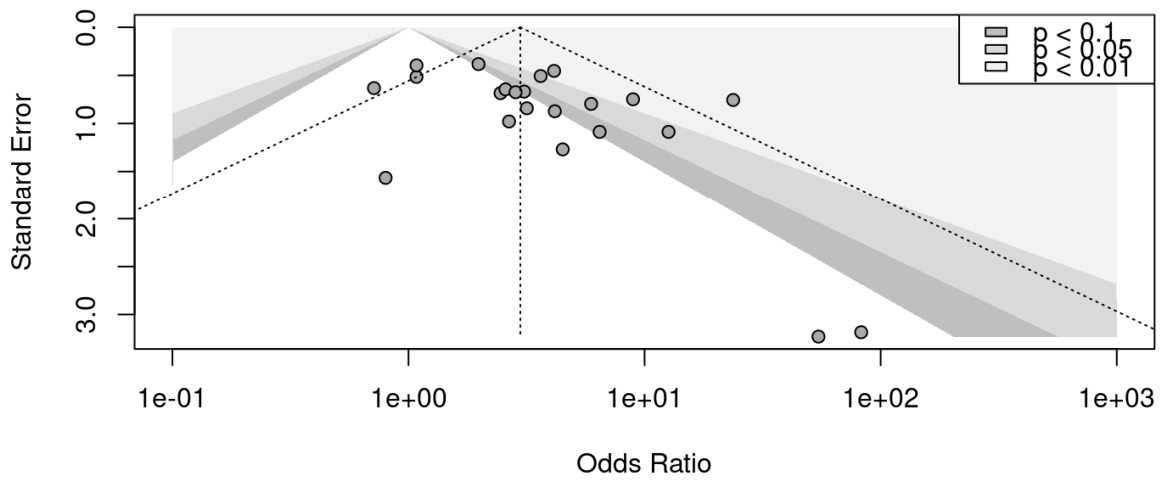

eFigure 5. Network diagram

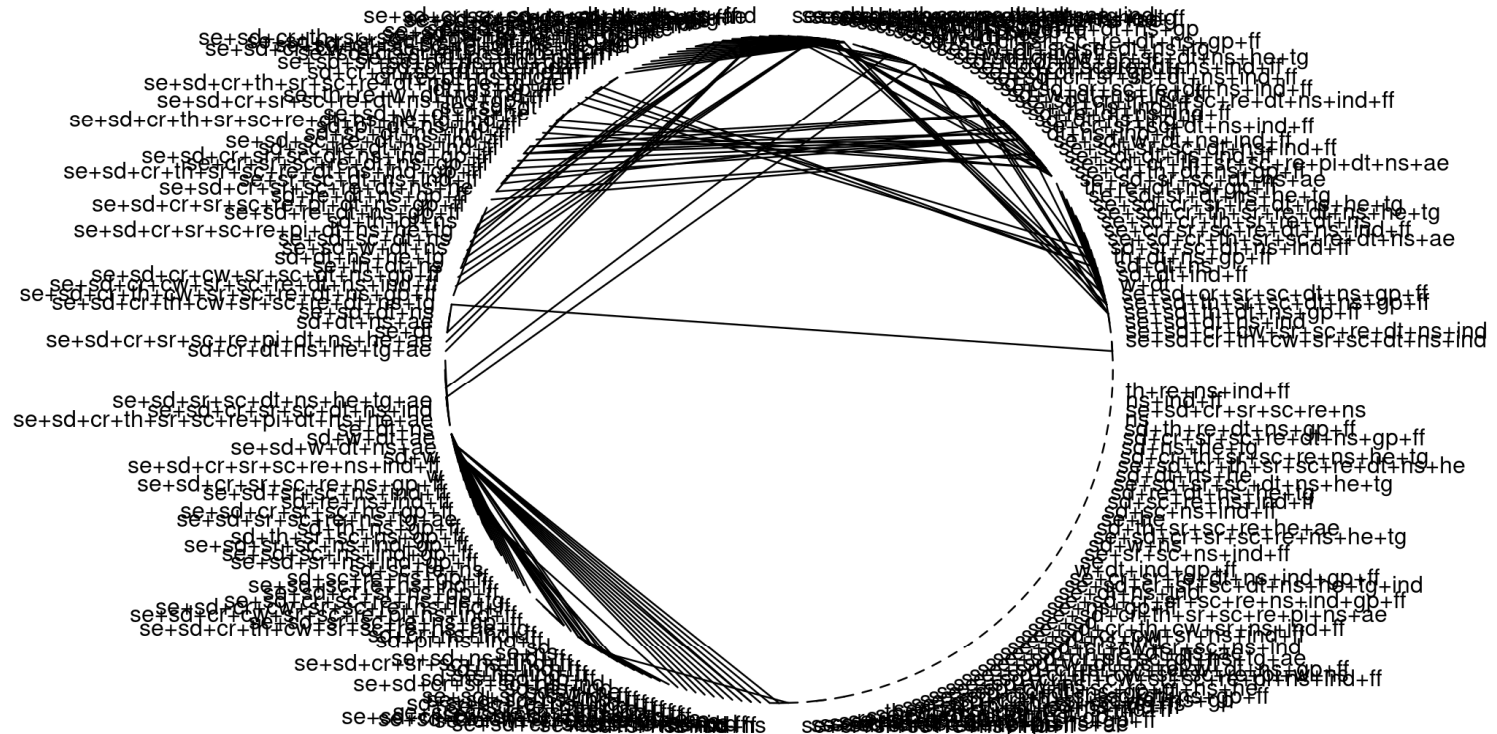

### eFigure 6. The colouring scheme of the results

We used the procedure previously described in the so-called 'Kilim plot' to visualize the results.

• Seo M, Furukawa TA, Veroniki AA, et al. The Kilim plot: A tool for visualizing network meta-analysis results for multiple outcomes. *Res Synth Methods*. 2021;12(1):86-95. doi:10.1002/jrsm.1428

|                      | Beneficial | Harmful |
|----------------------|------------|---------|
| $p > 0.10$           |            |         |
| $0.05 < p \leq 0.10$ |            |         |
| $0.10 < p \leq 0.05$ |            |         |
| $p \leq 0.01$        |            |         |

**eFigure 7. Sensitivity analyses**  
**7.1. Pre-specified and post-hoc sensitivity analyses**

|                               | S1                    | S2                                         | S3                                            | S4                          | S5                   | S6                                   | S7                       | S8                     | S9                      |
|-------------------------------|-----------------------|--------------------------------------------|-----------------------------------------------|-----------------------------|----------------------|--------------------------------------|--------------------------|------------------------|-------------------------|
|                               | Formal diagnosis only | Excluding trials focusing on comorbidities | Excluding trials with high dropout rate (20%) | Excluding high risk of bias | ISI only             | Excluding delivery method components | Using continuous outcome | Excluding small trials | Excluding inactive arms |
|                               | k=145                 | k=117                                      | k=179                                         | k=160                       | k=179                | k=238                                | k=246                    | k=232                  | k=166                   |
|                               | $\tau^2=0.33$         | $\tau^2=0.49$                              | $\tau^2=0.29$                                 | $\tau^2=0.34$               | $\tau^2=0.31$        | $\tau^2=0.34$                        | $\tau^2=0.16$            | $\tau^2=0.34$          | $\tau^2=0.32$           |
|                               | iOR (95%CI)           | iOR (95%CI)                                | iOR (95%CI)                                   | iOR (95%CI)                 | iOR (95%CI)          | iOR (95%CI)                          | iSMD (95%CI)             | iOR (95%CI)            | iOR (95%CI)             |
| <b>Educational components</b> |                       |                                            |                                               |                             |                      |                                      |                          |                        |                         |
| Sleep hygiene education       | 1.18<br>(0.79; 1.76)  | 0.93<br>(0.58; 1.49)                       | 0.90<br>(0.66; 1.23)                          | 0.87<br>(0.61; 1.23)        | 0.97<br>(0.70; 1.33) | 0.98<br>(0.75; 1.28)                 | 0.01<br>(-0.13; 0.16)    | 1.01<br>(0.76; 1.33)   | 0.97<br>(0.71; 1.33)    |
| Sleep diary                   | 1.00<br>(0.62; 1.62)  | 1.00<br>(0.58; 1.73)                       | 1.12<br>(0.75; 1.67)                          | 0.89<br>(0.56; 1.42)        | 0.71<br>(0.50; 1.02) | 0.77<br>(0.56; 1.05)                 | 0.03<br>(-0.14; 0.20)    | 0.86<br>(0.62; 1.19)   | 0.78<br>(0.52; 1.17)    |
| <b>Cognitive components</b>   |                       |                                            |                                               |                             |                      |                                      |                          |                        |                         |
| Cognitive restructuring       | 1.55<br>(1.10; 2.17)  | 1.65<br>(1.08; 2.54)                       | 1.73<br>(1.28; 2.33)                          | 1.78<br>(1.24; 2.54)        | 1.97<br>(1.47; 2.65) | 1.62<br>(1.24; 2.12)                 | -0.28<br>(-0.43; -0.13)  | 1.69<br>(1.28; 2.23)   | 1.43<br>(1.04; 1.96)    |
| Third wave components         | 1.44<br>(0.95; 2.20)  | 1.46<br>(0.90; 2.37)                       | 1.48<br>(1.04; 2.10)                          | 1.56<br>(1.04; 2.35)        | 1.41<br>(1.01; 1.98) | 1.47<br>(1.09; 1.99)                 | -0.22<br>(-0.38; -0.06)  | 1.49<br>(1.09; 2.02)   | 1.31<br>(0.90; 1.90)    |
| Constructive worry            | 0.70<br>(0.32; 1.53)  | 1.40<br>(0.46; 4.25)                       | 0.82<br>(0.46; 1.49)                          | 0.96<br>(0.47; 1.97)        | 0.79<br>(0.48; 1.32) | 0.98<br>(0.59; 1.64)                 | -0.15<br>(-0.42; 0.13)   | 0.91<br>(0.55; 1.52)   | 0.87<br>(0.45; 1.66)    |
| <b>Behavioral components</b>  |                       |                                            |                                               |                             |                      |                                      |                          |                        |                         |
| Sleep restriction             | 1.96<br>(1.19; 3.23)  | 1.52<br>(0.90; 2.57)                       | 1.42<br>(0.99; 2.04)                          | 1.38<br>(0.88; 2.16)        | 1.62<br>(1.04; 2.54) | 1.52<br>(1.07; 2.17)                 | -0.21<br>(-0.40; -0.01)  | 1.50<br>(1.04; 2.16)   | 1.55<br>(1.01; 2.37)    |
| Stimulus control              | 0.95<br>(0.55; 1.64)  | 1.83<br>(1.13; 2.97)                       | 1.45<br>(1.00; 2.11)                          | 1.71<br>(1.10; 2.68)        | 1.29<br>(0.81; 2.05) | 1.47<br>(1.03; 2.10)                 | -0.25<br>(-0.43; -0.07)  | 1.39<br>(0.96; 2.02)   | 1.62<br>(1.04; 2.54)    |
| Paradoxical intention         | 1.02<br>(0.56; 1.86)  | 0.81<br>(0.43; 1.55)                       | 1.16<br>(0.68; 2.00)                          | 1.03<br>(0.57; 1.85)        | 1.13<br>(0.66; 1.91) | 1.10<br>(0.72; 1.67)                 | -0.09<br>(-0.34; 0.17)   | 1.06<br>(0.68; 1.65)   | 1.02<br>(0.55; 1.89)    |
| Relaxation                    | 0.85<br>(0.63; 1.15)  | 0.76<br>(0.54; 1.08)                       | 0.80<br>(0.61; 1.03)                          | 0.79<br>(0.58; 1.09)        | 0.73<br>(0.56; 0.96) | 0.82<br>(0.65; 1.03)                 | 0.12<br>(0.00; 0.24)     | 0.80<br>(0.63; 1.01)   | 0.87<br>(0.66; 1.14)    |
| <b>Others</b>                 |                       |                                            |                                               |                             |                      |                                      |                          |                        |                         |
| Non-specific treatment effect | 1.18<br>(0.71; 1.95)  | 1.24<br>(0.69; 2.20)                       | 1.19<br>(0.77; 1.85)                          | 1.15<br>(0.71; 1.88)        | 1.17<br>(0.75; 1.83) | 1.41<br>(1.01; 1.98)                 | -0.21<br>(-0.40; -0.02)  | 1.17<br>(0.80; 1.71)   | 0.96<br>(0.59; 1.56)    |
| Waiting component             | 0.58<br>(0.38; 0.90)  | 0.73<br>(0.43; 1.24)                       | 0.56<br>(0.38; 0.81)                          | 0.53<br>(0.35; 0.79)        | 0.56<br>(0.38; 0.81) | 0.65<br>(0.47; 0.89)                 | 0.18<br>(0.02; 0.34)     | 0.64<br>(0.46; 0.88)   | 1.57<br>(0.44; 5.63)    |
| <b>Delivery methods</b>       |                       |                                            |                                               |                             |                      |                                      |                          |                        |                         |
| Individual                    | 1.60<br>(0.89; 2.87)  | 0.98<br>(0.55; 1.75)                       | 1.14<br>(0.67; 1.94)                          | 1.09<br>(0.61; 1.95)        | 0.88<br>(0.56; 1.39) | -                                    | 0.08<br>(-0.15; 0.30)    | 0.99<br>(0.65; 1.52)   | 1.25<br>(0.71; 2.19)    |
| Group                         | 0.90<br>(0.50; 1.59)  | 0.85<br>(0.45; 1.61)                       | 0.92<br>(0.53; 1.59)                          | 0.82<br>(0.43; 1.56)        | 0.62<br>(0.38; 1.01) | -                                    | 0.10<br>(-0.13; 0.33)    | 0.70<br>(0.45; 1.10)   | 0.81<br>(0.45; 1.48)    |
| Face-to-face                  | 1.32<br>(0.77; 2.27)  | 1.66<br>(0.90; 3.08)                       | 1.62<br>(0.96; 2.73)                          | 1.47<br>(0.84; 2.57)        | 2.34<br>(1.46; 3.75) | -                                    | -0.36<br>(-0.58; -0.14)  | 1.88<br>(1.22; 2.91)   | 1.88<br>(1.12; 3.16)    |
| Online therapeutic guidance   | 1.07<br>(0.56; 2.03)  | 0.87<br>(0.41; 1.85)                       | 0.83<br>(0.49; 1.41)                          | 1.50<br>(0.74; 3.05)        | 1.09<br>(0.64; 1.86) | -                                    | 0.09<br>(-0.19; 0.37)    | 1.00<br>(0.61; 1.64)   | 0.99<br>(0.51; 1.93)    |
| Human encouragement           | 1.39<br>(0.80; 2.43)  | 1.77<br>(0.87; 3.59)                       | 1.87<br>(1.10; 3.18)                          | 0.95<br>(0.50; 1.78)        | 1.11<br>(0.66; 1.87) | -                                    | -0.17<br>(-0.42; 0.07)   | 1.30<br>(0.82; 2.06)   | 1.21<br>(0.59; 2.48)    |
| Automated encouragement       | 0.83<br>(0.46; 1.48)  | 0.77<br>(0.44; 1.34)                       | 0.80<br>(0.48; 1.31)                          | 0.95<br>(0.57; 1.58)        | 0.98<br>(0.65; 1.47) | -                                    | 0.09<br>(-0.12; 0.30)    | 0.89<br>(0.61; 1.29)   | 1.20<br>(0.72; 2.01)    |

1) excluding studies without formal diagnosis of chronic insomnia disorder; 2) excluding studies on patients with comorbidities (both physical and psychological); 3) excluding studies with overall dropout rate >20%; and 4) excluding studies at high overall risk of bias. We conducted the following post-hoc sensitivity analyses: 5) focusing on trials that reported the Insomnia Severity Index; 6) assuming no effect of delivery format components; 7) treating insomnia severity as a continuous outcome; 8) excluding arms with less than 10 participants.



## **7.2. NMA and cNMA using risk difference in comparison with odds ratio**

### **7.2.1. NMA using OR and RD**

CBT was the most efficacious followed by BT and CT in bringing about remission according to the two NMAs. The heterogeneity ( $I^2$ ) was greater in the NMA using RD than that using OR (78.6% (95%CI: 75.8% to 81.0%) vs 43.2% (33.6% to 51.5%)).

#NMA (OR)

Number of studies: k = 229

Number of pairwise comparisons: m = 254

Number of treatments: n = 9

Number of designs: d = 29

Quantifying heterogeneity / inconsistency:

$\tau^2 = 0.2298$ ;  $\tau = 0.4794$ ;  $I^2 = 43.2\%$  [33.6%; 51.5%]

Tests of heterogeneity (within designs) and inconsistency (between designs):

|                 | Q      | d.f. | p-value  |
|-----------------|--------|------|----------|
| Total           | 410.41 | 233  | < 0.0001 |
| Within designs  | 355.80 | 201  | < 0.0001 |
| Between designs | 54.61  | 32   | 0.0076   |

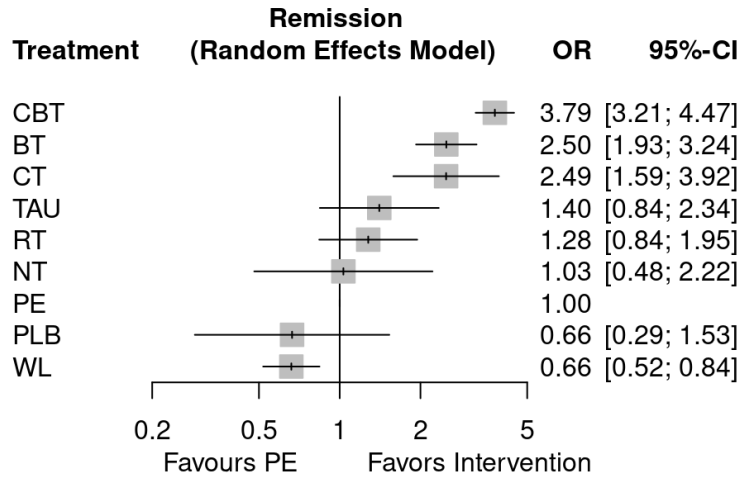

#NMA (RD)

Number of studies: k = 232

Number of pairwise comparisons: m = 257

Number of treatments: n = 9

Number of designs: d = 30

Quantifying heterogeneity / inconsistency:

$\tau^2 = 0.0161$ ;  $\tau = 0.1269$ ;  $I^2 = 78.6\%$  [75.8%; 81.0%]

Tests of heterogeneity (within designs) and inconsistency (between designs):

|                 | Q       | d.f. | p-value  |
|-----------------|---------|------|----------|
| Total           | 1100.80 | 236  | < 0.0001 |
| Within designs  | 975.49  | 203  | < 0.0001 |
| Between designs | 125.31  | 33   | < 0.0001 |

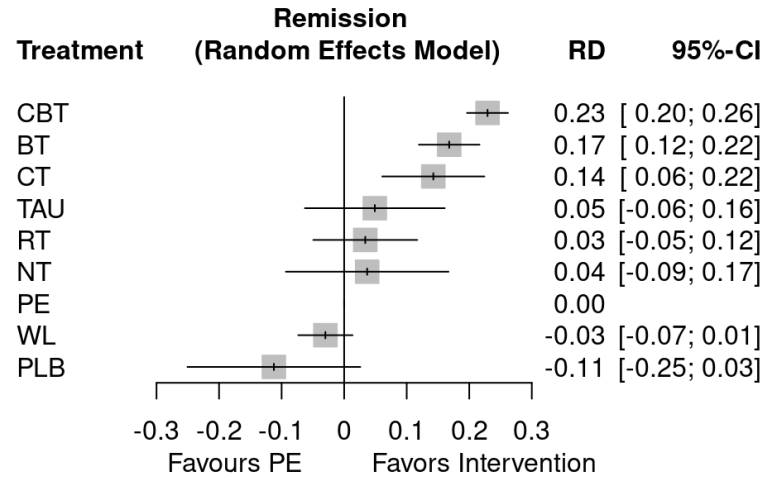

### 7.2.2. cNMA using OR and RD

We converted the iOR into RDs assuming the average observed event rate (23%) of all included trials (cRD). The 95% confidence intervals of cRD overlapped largely with those of iRDs. Also the heterogeneity ( $I^2$ ) was greater in the cNMA using RD than that using OR (79.6% (95%CI: 77.2% to 81.8%) vs 50.0% (42.3% to 56.7%)).

|                               | iOR (95%CI)          | cRD (95%CI)             | iRD (95%CI)             |
|-------------------------------|----------------------|-------------------------|-------------------------|
| <b>Educational components</b> |                      |                         |                         |
| Sleep hygiene education       | 1.01<br>(0.77; 1.32) | 0.00<br>(-0.04; 0.05)   | 0.01<br>(-0.04; 0.06)   |
| Sleep diary                   | 0.81<br>(0.59; 1.12) | -0.04<br>(-0.08; 0.02)  | -0.03<br>(-0.08; 0.03)  |
| <b>Cognitive components</b>   |                      |                         |                         |
| Cognitive restructuring       | 1.68<br>(1.28; 2.2)  | 0.10<br>(0.05; 0.17)    | 0.06<br>(0.01; 0.12)    |
| Third wave components         | 1.49<br>(1.10; 2.03) | 0.08<br>(0.02; 0.15)    | 0.08<br>(0.03; 0.13)    |
| Constructive worry            | 0.91<br>(0.55; 1.51) | -0.02<br>(-0.09; 0.08)  | -0.00<br>(-0.10; 0.09)  |
| <b>Behavioral components</b>  |                      |                         |                         |
| Sleep restriction             | 1.49<br>(1.04; 2.13) | 0.08<br>(0.01; 0.16)    | 0.05<br>(-0.02; 0.12)   |
| Stimulus control              | 1.43<br>(1.00; 2.05) | 0.07<br>(0; 0.15)       | 0.11<br>(0.04; 0.17)    |
| Paradoxical intention         | 1.06<br>(0.68; 1.65) | 0.01<br>(-0.06; 0.10)   | 0.01<br>(-0.08; 0.10)   |
| Relaxation                    | 0.81<br>(0.64; 1.02) | -0.04<br>(-0.07; 0.00)  | -0.05<br>(-0.10; -0.01) |
| <b>Others</b>                 |                      |                         |                         |
| Non-specific treatment effect | 1.17<br>(0.81; 1.71) | 0.03<br>(-0.04; 0.11)   | 0.05<br>(-0.02; 0.11)   |
| Waiting component             | 0.64<br>(0.47; 0.89) | -0.07<br>(-0.11; -0.02) | -0.02<br>(-0.08; 0.03)  |
| <b>Delivery methods</b>       |                      |                         |                         |
| Individual                    | 0.98<br>(0.64; 1.49) | 0.00<br>(-0.07; 0.08)   | 0.02<br>(-0.05; 0.10)   |
| Group                         | 0.71<br>(0.46; 1.11) | -0.06<br>(-0.11; 0.02)  | -0.09<br>(-0.17; -0.01) |
| Face-to-face                  | 1.83<br>(1.19; 2.81) | 0.12<br>(0.03; 0.23)    | 0.09<br>(0.02; 0.17)    |
| Online therapeutic guidance   | 0.99<br>(0.61; 1.62) | 0.00<br>(-0.08; 0.10)   | -0.03<br>(-0.13; 0.06)  |
| Human encouragement           | 1.30<br>(0.83; 2.06) | 0.05<br>(-0.03; 0.15)   | 0.06<br>(-0.03; 0.15)   |
| Automated encouragement       | 0.89<br>(0.61; 1.29) | -0.02<br>(-0.08; 0.05)  | -0.03<br>(-0.10; 0.05)  |

iOR = incremental odds ratio according to cNMA. cRD = risk difference converted from iOR assuming a control event rate of 23%. iRD = incremental risk difference according to cNMA

### 7.3. Bayesian model to examine the effects of two-way interactions

As sensitivity analyses, we fitted a series of Bayesian component network meta-analysis models. More specifically, we first used a Bayesian additive model equivalent to the frequentist model used in the primary analysis but with a binomial likelihood (Bayesian additive model in the table below). We used uninformative prior distributions for all model parameters except for heterogeneity ( $\tau$ ). For  $\tau$ , we used an informative prior based on Turner et al (2015), where we used the predictive distribution for mental health indicators, for the comparison between non-pharmacological interventions. The model was proposed by Welton et al (2009). We fitted the model using Markov Chain Monte Carlo (MCMC), with 4 chains, 5000 iterations each, after 500 iterations burn-in.

Second, we extended this model to include all two-way interactions between all components (All interactions in the table below). We used a Bayesian variable selection method called Stochastic Search Variable Selection (SSVS), which also shrinks (penalizes) the interaction terms. This model has been recently proposed by Efthimiou et al (2022). The model includes an indicator variable  $I_{p,q}$  for the combination between components p and q. This indicator can take values 0 or 1, and controls whether the interaction between the components is included in the model in each iteration of the MCMC. Effectively, when  $I_{p,q} = 0$  the interaction term is absent from the model, and when  $I_{p,q} = 1$  it is included. The prior of  $I_{p,q}$  reflects the prior probability for the interaction to be included in the model. We assigned a Bernoulli prior with probability 0.5 to all interaction terms; this choice makes all interactions a priori equally probable. This is similar to model V in Efthimiou et al (2022).

Finally, we further refined the model by only allowing interactions between active components (se, sd, cr, th, sr, sc, re, ff) (Selected interactions in the table below). We assigned a Bernoulli prior with probability 0.8 to all two-way interaction terms between these components and set all other interactions to zero.

|                               | Bayesian additive model | All interactions model | Selected interactions model |
|-------------------------------|-------------------------|------------------------|-----------------------------|
|                               | iOR [95% CrI]           | iOR [95% CrI]          | iOR [95% CrI]               |
| <b>Educational components</b> |                         |                        |                             |
| Sleep hygiene education       | 1.09[ 0.81; 1.51]       | 1.05[ 0.62; 1.84]      | 1.11[ 0.68; 1.75]           |
| Sleep diary                   | 0.86[ 0.59; 1.25]       | 0.83[ 0.53; 1.29]      | 0.78[ 0.52; 1.19]           |
| <b>Cognitive components</b>   |                         |                        |                             |
| Cognitive restructuring       | 1.73[ 1.26; 2.38]       | 1.68[ 0.84; 3.80]      | 1.81[ 0.83; 3.93]           |
| Third wave components         | 1.83[ 1.28; 2.60]       | 3.64[ 1.49;11.67]      | 3.96[ 1.78;10.23]           |
| Constructive worry            | 1.44[ 0.72; 2.96]       | 1.49[ 0.29; 8.16]      | 1.65[ 0.80; 3.36]           |
| <b>Behavioral components</b>  |                         |                        |                             |
| Sleep restriction             | 1.58[ 1.04; 2.41]       | 1.84[ 0.93; 4.04]      | 1.84[ 0.75; 5.12]           |
| Stimulus control              | 1.47[ 0.96; 2.26]       | 1.38[ 0.54; 2.77]      | 1.44[ 0.62; 3.28]           |
| Paradoxical intention         | 0.96[ 0.56; 1.63]       | 1.20[ 0.45; 3.97]      | 1.23[ 0.72; 2.13]           |
| Relaxation                    | 0.83[ 0.64; 1.07]       | 1.08[ 0.61; 2.53]      | 1.22[ 0.68; 2.40]           |
| <b>Others</b>                 |                         |                        |                             |
| Non-specific treatment effect | 0.60[ 0.41; 0.85]       | 0.62[ 0.38; 0.96]      | 0.63[ 0.44; 0.90]           |
| Waiting component             | 1.20[ 0.78; 1.86]       | 1.14[ 0.64; 1.86]      | 1.22[ 0.77; 1.93]           |
| <b>Delivery methods</b>       |                         |                        |                             |

|                             |                   |                   |                   |
|-----------------------------|-------------------|-------------------|-------------------|
| Individual                  | 1.01[ 0.62; 1.64] | 1.04[ 0.49; 2.35] | 1.10[ 0.68; 1.77] |
| Group                       | 0.66[ 0.39; 1.11] | 0.68[ 0.24; 1.80] | 0.69[ 0.42; 1.17] |
| Face-to-face                | 1.88[ 1.13; 3.08] | 1.29[ 0.48; 2.86] | 1.03[ 0.43; 2.16] |
| Online therapeutic guidance | 0.94[ 0.52; 1.68] | 0.88[ 0.28; 2.51] | 0.99[ 0.56; 1.76] |
| Human encouragement         | 1.27[ 0.75; 2.16] | 1.41[ 0.54; 3.45] | 1.39[ 0.83; 2.32] |
| Automated encouragement     | 0.77[ 0.49; 1.19] | 0.84[ 0.38; 1.91] | 0.88[ 0.55; 1.41] |
| <b>tau</b>                  | 0.60[ 0.43; 0.83] | 0.46[ 0.28; 0.72] | 0.51[ 0.34; 0.72] |

The following scatter plot shows the relationship between estimates for indicator variables and interaction coefficients for the “All interactions” model.

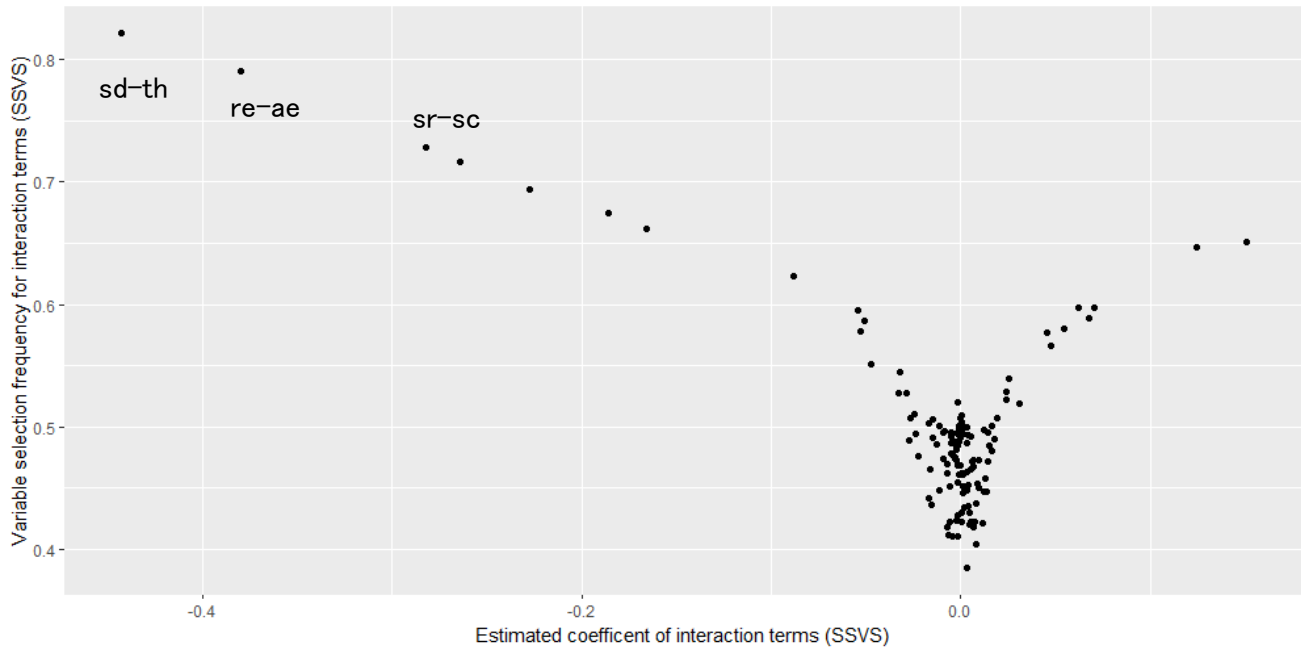

The scatterplot for the “Selected interactions” model is as follows:

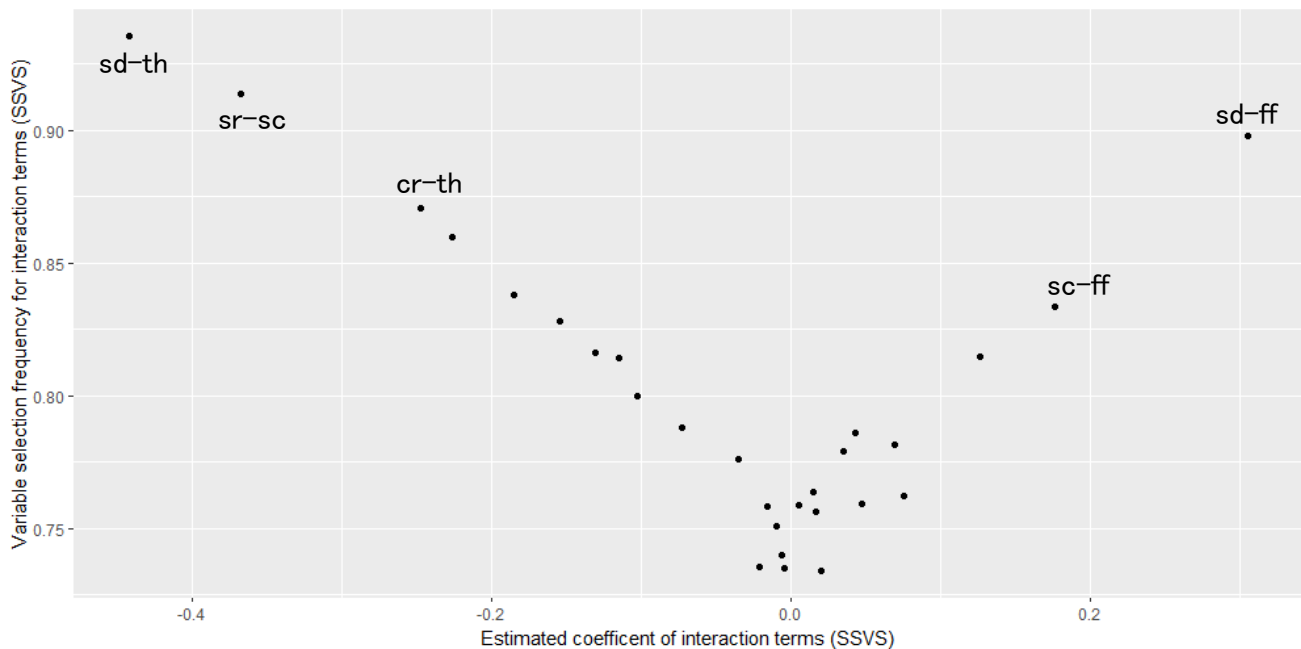

These graphs show that most interaction coefficients were estimated around 0 (null effect). In addition, the corresponding 95% Credible Intervals were wide, indicating uncertainty in estimation. Several interactions were estimated to have a relatively large effect; for these interactions the indicator variable (y-axis) was estimated at larger values, i.e. showing that these variables were more frequently included in the models. However, uncertainty was also substantial. Some of the interactions with suggestive evidence (e.g. “sd-th” (sleep diary and third wave) or “re-ae” (relaxation and automated encouragement)) were hard to interpret; however, some others, in particular “sr-sc” (sleep restriction and stimulus control) and “cr-th” (cognitive restructuring and third wave), appeared clinical plausible, because arguably sleep restriction and stimulus control have overlapping contents and doing both may not be totally additive, or because cognitive restructuring and third wave components may be considered theoretically antithetical in their approach to maladaptive beliefs.

We therefore examined how a typical CBTI-I package including all cr, th, sr and sc (in addition to se, sd, ns, ind and ff) would compare with the placebo control condition (se, ns, ind, ff), and how the CBTI-I package may compare against the same control condition if you subtract cr, th, sr or sc individually, both in the additive model and the interaction models.

| components                  | Bayesian additive model<br>OR [95% CrI] | All interactions model<br>OR [95% CrI] | Selected interactions model<br>OR [95% CrI] |
|-----------------------------|-----------------------------------------|----------------------------------------|---------------------------------------------|
| se+sd+cr+th+sr+sc+ns+ind+ff |                                         |                                        |                                             |
| full vs se+ns+ind+ff        | 6.26 [3.64; 10.98]                      | 7.73 [3.70; 17.33]                     | 6.08 [2.80; 12.86]                          |
| se+sd+th+sr+sc+ns+ind+ff    |                                         |                                        |                                             |
| -cr vs se+ns+ind+ff         | 3.62 [2.05; 6.45]                       | 5.78 [2.48; 16.63]                     | 4.49 [2.03; 10.87]                          |
| se+sd+cr+sr+sc+ns+ind+ff    |                                         |                                        |                                             |
| -th vs se+ns+ind+ff         | 3.44 [2.23; 5.27]                       | 4.45 [2.57; 8.10]                      | 5.05 [2.88; 9.07]                           |
| se+sd+cr+th+sc+ns+ind+ff    |                                         |                                        |                                             |
| -sr vs se+ns+ind+ff         | 3.97 [1.98; 8.08]                       | 5.37 [2.11; 15.75]                     | 4.66 [1.62; 14.05]                          |
| se+sd+cr+th+sr+ns+ind+ff    |                                         |                                        |                                             |
| -sc vs se+ns+ind+ff         | 4.28 [2.27; 8.16]                       | 6.66 [2.66; 19.12]                     | 6.17 [2.42; 17.67]                          |

se = sleep hygiene education; sd = sleep diary; cr = cognitive restructuring; th = third wave components; sr = sleep restriction; sc = stimulus control; ns = non-specific treatment effect; ff = face-to-face contact.

We see that the ORs of the comparisons of the full and full-minus-one-component packages did not differ materially according to the additive or interaction models (typically the interaction models had wider 95% Credible Intervals overlapping with the 95% Credible Interval of the additive model), and the relative recommendations from among the full and the full-minus-one-component packages did not change.

- Turner RM, Jackson D, Wei Y, Thompson SG, Higgins JP. Predictive distributions for between-study heterogeneity and simple methods for their application in Bayesian meta-analysis. *Stat Med.* 2015;34(6):984-998. doi:10.1002/sim.6381
- Welton NJ, Caldwell DM, Adamopoulos E, Vedhara K. Mixed treatment comparison meta-analysis of complex interventions: psychological interventions in coronary heart disease. *Am J Epi.* 2009;169(9):1158-1165.

- Efthimiou O, Seo M, Karyotaki E, et al. Bayesian models for aggregate and individual patient data component network meta-analysis. *Stat Med*. 2022;41(14):2586-2601. doi:10.1002/sim.9372



eFigure 8. Subgroup analyses

|                               | Age                  |                      |                      |                      | Gender               |                      | Hypnotic use         |                      | Comorbidities        |                      | Baseline severity    |                      |
|-------------------------------|----------------------|----------------------|----------------------|----------------------|----------------------|----------------------|----------------------|----------------------|----------------------|----------------------|----------------------|----------------------|
|                               | 18-35                | 35-50                | 50-70                | 70+                  | Female>80%           | Female<20%           | Allowed              | Not allowed          | With                 | Without              | ISI>=16              | ISI<16               |
|                               | k=26                 | k=88                 | k=91                 | k=10                 | k=57                 | k=19                 | k=160                | k=85                 | k=128                | k=62                 | k=113                | k=49                 |
|                               | $r^2=0.14$           | $r^2=0.43$           | $r^2=0.18$           | $r^2=NA$             | $r^2=0.60$           | $r^2=0.00$           | $r^2=0.37$           | $r^2=0.35$           | $r^2=0.21$           | $r^2=0.30$           | $r^2=0.29$           | $r^2=0.23$           |
|                               | iOR (95%CI)          | iOR (95%CI)          | iOR (95%CI)          | iOR (95%CI)          | iOR (95%CI)          | iOR (95%CI)          | iOR (95%CI)          | iOR (95%CI)          | iOR (95%CI)          | iOR (95%CI)          | iOR (95%CI)          | iOR (95%CI)          |
| <b>Educational components</b> |                      |                      |                      |                      |                      |                      |                      |                      |                      |                      |                      |                      |
| Sleep hygiene education       | 0.81<br>(0.10; 6.76) | 0.82<br>(0.44; 1.50) | 0.90<br>(0.59; 1.37) | 0.59<br>(0.19; 1.82) | 1.24<br>(0.58; 2.64) | 0.81<br>(0.33; 1.98) | 1.01<br>(0.71; 1.45) | 0.93<br>(0.57; 1.54) | 1.07<br>(0.75; 1.52) | 0.82<br>(0.44; 1.54) | 0.98<br>(0.62; 1.54) | 1.04<br>(0.59; 1.81) |
| Sleep diary                   | 0.69<br>(0.09; 5.13) | 1.04<br>(0.57; 1.91) | 0.80<br>(0.46; 1.39) | 2.16<br>(0.62; 7.47) | 0.78<br>(0.31; 1.96) | 0.46<br>(0.07; 3.18) | 0.70<br>(0.45; 1.09) | 0.96<br>(0.56; 1.66) | 0.77<br>(0.51; 1.18) | 1.91<br>(0.84; 4.34) | 0.51<br>(0.30; 0.85) | 0.96<br>(0.52; 1.80) |
| <b>Cognitive components</b>   |                      |                      |                      |                      |                      |                      |                      |                      |                      |                      |                      |                      |
| Cognitive restructuring       | 4.43<br>(0.91; 21.5) | 2.37<br>(1.45; 3.87) | 1.22<br>(0.84; 1.76) | 2.56<br>(0.36; 18.1) | 1.94<br>(0.82; 4.59) | 0.53<br>(0.15; 1.81) | 1.52<br>(1.09; 2.14) | 2.36<br>(1.30; 4.30) | 1.73<br>(1.19; 2.53) | 1.09<br>(0.58; 2.05) | 2.04<br>(1.42; 2.95) | 1.94<br>(1.06; 3.55) |
| Third wave components         | 4.47<br>(1.17; 17.0) | 1.29<br>(0.72; 2.33) | 1.53<br>(0.96; 2.43) | 3.02<br>(1.24; 7.34) | 1.64<br>(0.73; 3.69) | 79.7<br>(3.68; 1728) | 1.29<br>(0.89; 1.87) | 2.21<br>(1.17; 4.20) | 1.77<br>(1.13; 2.75) | 1.07<br>(0.56; 2.04) | 1.99<br>(1.31; 3.04) | 1.66<br>(0.59; 4.63) |
| Constructive worry            | 1.78<br>(0.12; 26.1) | 0.64<br>(0.21; 1.94) | 1.35<br>(0.66; 2.77) | 0.44<br>(0.15; 1.27) | 1.62<br>(0.38; 6.83) | -                    | 0.91<br>(0.45; 1.83) | 0.97<br>(0.42; 2.24) | 0.87<br>(0.49; 1.55) | 1.66<br>(0.20; 13.7) | 1.02<br>(0.50; 2.09) | 0.48<br>(0.16; 1.47) |
| <b>Behavioral components</b>  |                      |                      |                      |                      |                      |                      |                      |                      |                      |                      |                      |                      |
| Sleep restriction             | 0.81<br>(0.18; 3.56) | 1.20<br>(0.55; 2.60) | 1.88<br>(1.17; 3.00) | 0.98<br>(0.36; 2.64) | 1.53<br>(0.45; 5.27) | 2.25<br>(1.28; 3.96) | 1.24<br>(0.72; 2.16) | 1.50<br>(0.89; 2.55) | 1.78<br>(1.01; 3.12) | 1.80<br>(1.03; 3.17) | 1.39<br>(0.68; 2.85) | 1.47<br>(0.74; 2.91) |
| Stimulus control              | 1.79<br>(0.24; 13.3) | 1.80<br>(0.90; 3.60) | 1.49<br>(0.88; 2.53) | 0.98<br>(0.36; 2.64) | 0.78<br>(0.19; 3.22) | 2.25<br>(1.28; 3.96) | 1.81<br>(1.06; 3.08) | 1.11<br>(0.64; 1.92) | 1.00<br>(0.53; 1.90) | 2.03<br>(1.23; 3.33) | 1.44<br>(0.71; 2.92) | 1.32<br>(0.61; 2.85) |
| Paradoxical intention         | 0.38<br>(0.09; 1.71) | 1.30<br>(0.52; 3.26) | 1.16<br>(0.55; 2.44) | -                    | 0.88<br>(0.20; 3.98) | -                    | 1.21<br>(0.70; 2.10) | 0.68<br>(0.28; 1.63) | 1.51<br>(0.72; 3.18) | 1.11<br>(0.44; 2.81) | 1.39<br>(0.71; 2.74) | 0.87<br>(0.32; 2.34) |
| Relaxation                    | 0.39<br>(0.07; 2.21) | 0.54<br>(0.35; 0.83) | 0.88<br>(0.62; 1.26) | 3.72<br>(0.36; 38.0) | 1.33<br>(0.65; 2.69) | 1.13<br>(0.41; 3.08) | 0.74<br>(0.56; 1.00) | 1.04<br>(0.68; 1.58) | 0.83<br>(0.60; 1.14) | 0.90<br>(0.57; 1.42) | 0.78<br>(0.55; 1.12) | 0.62<br>(0.37; 1.05) |
| <b>Others</b>                 |                      |                      |                      |                      |                      |                      |                      |                      |                      |                      |                      |                      |
| Non-specific treatment effect | 4.12<br>(0.52; 32.8) | 1.30<br>(0.57; 2.94) | 0.96<br>(0.52; 1.77) | 2.11<br>(0.38; 11.8) | 1.26<br>(0.40; 3.97) | 0.53<br>(0.02; 11.9) | 1.38<br>(0.85; 2.23) | 0.89<br>(0.44; 1.78) | 1.21<br>(0.68; 2.15) | 1.73<br>(0.77; 3.91) | 1.54<br>(0.84; 2.84) | 0.83<br>(0.32; 2.16) |
| Waiting component             | 1.03<br>(0.34; 3.12) | 0.46<br>(0.23; 0.91) | 0.51<br>(0.29; 0.88) | 0.82<br>(0.26; 2.58) | 0.82<br>(0.35; 1.95) | 0.27<br>(0.00; 37.1) | 0.65<br>(0.44; 0.96) | 0.64<br>(0.34; 1.20) | 0.50<br>(0.32; 0.78) | 1.15<br>(0.52; 2.55) | 0.78<br>(0.47; 1.31) | 0.40<br>(0.18; 0.92) |
| <b>Delivery methods</b>       |                      |                      |                      |                      |                      |                      |                      |                      |                      |                      |                      |                      |
| Individual                    | 0.88<br>(0.18; 4.17) | 0.80<br>(0.38; 1.68) | 1.94<br>(0.80; 4.66) | 0.90<br>(0.51; 1.59) | 0.91<br>(0.20; 4.13) | 0.23<br>(0.07; 0.76) | 1.09<br>(0.62; 1.93) | 0.96<br>(0.46; 1.99) | 0.57<br>(0.26; 1.25) | 1.55<br>(0.55; 4.39) | 1.10<br>(0.60; 2.00) | 2.92<br>(0.68; 12.5) |
| Group                         | 0.71<br>(0.25; 2.00) | 0.45<br>(0.19; 1.09) | 1.24<br>(0.51; 3.02) | 0.91<br>(0.53; 1.56) | 0.58<br>(0.14; 2.43) | 0.24<br>(0.08; 0.69) | 0.71<br>(0.40; 1.28) | 0.86<br>(0.41; 1.85) | 0.38<br>(0.17; 0.83) | 2.41<br>(0.79; 7.32) | 0.54<br>(0.31; 0.95) | 2.94<br>(0.54; 16.1) |
| Face-to-face                  | 1.43<br>(0.45; 4.56) | 2.23<br>(0.99; 5.00) | 1.03<br>(0.42; 2.53) | 0.82<br>(0.37; 1.79) | 2.92<br>(0.79; 10.8) | 2.19<br>(0.38; 12.5) | 1.56<br>(0.89; 2.74) | 2.27<br>(1.09; 4.74) | 2.79<br>(1.36; 5.75) | 0.81<br>(0.33; 2.03) | 2.44<br>(1.43; 4.17) | 0.85<br>(0.18; 4.01) |
| Online therapeutic guidance   | 2.55<br>(0.36; 18.3) | 0.67<br>(0.31; 1.45) | 0.78<br>(0.28; 2.16) | 0.46<br>(0.11; 2.01) | 1.25<br>(0.34; 4.62) | -                    | 0.94<br>(0.52; 1.69) | 0.80<br>(0.20; 3.22) | 0.84<br>(0.40; 1.77) | 0.43<br>(0.13; 1.42) | 1.68<br>(0.70; 4.02) | 0.97<br>(0.43; 2.15) |
| Human encouragement           | 0.42<br>(0.08; 2.24) | 1.55<br>(0.70; 3.41) | 1.31<br>(0.46; 3.74) | 1.19<br>(0.18; 7.92) | 0.74<br>(0.21; 2.56) | -                    | 1.43<br>(0.84; 2.44) | 1.24<br>(0.31; 4.93) | 0.88<br>(0.47; 1.67) | 3.29<br>(1.06; 10.2) | 1.20<br>(0.53; 2.71) | 1.01<br>(0.45; 2.28) |
| Automated encouragement       | 0.43<br>(0.11; 1.73) | 0.68<br>(0.35; 1.31) | 1.33<br>(0.66; 2.68) | 0.41<br>(0.02; 10.8) | 1.19<br>(0.42; 3.31) | 1.02<br>(0.30; 3.45) | 0.86<br>(0.53; 1.38) | 0.99<br>(0.45; 2.17) | 0.80<br>(0.45; 1.42) | 0.85<br>(0.35; 2.10) | 1.40<br>(0.80; 2.44) | 0.62<br>(0.29; 1.33) |

“-“ = not estimabl
