# Supplementary material for: Components and Delivery Formats of Cognitive Behavioral Therapy for Chronic Insomnia in Adults: A Systematic Review and Component Network Meta-Analysis
Source: PubMed Central journal article supplement (PMC10794978; doi:10.1001/jamapsychiatry.2023.5060), 2024-01-17
Supplement: jamapsychiatry-e235060-s002.pdf [file jamapsychiatry-e235060-s002.pdf]

## Data Sharing Statement

Furukawa. Components and Delivery Formats of Cognitive Behavioral Therapy for Chronic Insomnia in Adults. *JAMA Psychiatry*. Published January 17, 2024.

doi:10.1001/jamapsychiatry.2023.5060

### Data

**Data available:** Yes

**Data types:** Other (please specify)

**Additional Information:** Extracted data and code

**How to access data:** Codes for all analyses are available in a repository on GitHub (URL).

**When available:** With publication

### Supporting Documents

**Document types:** Statistical/analytic code

**How to access documents:** Codes for all analyses are available in a repository on GitHub (URL).

**When available:** With publication

### Additional Information

**Who can access the data:** Anyone requesting the data and code on reasonable request

**Types of analyses:** Any purpose

**Mechanisms of data availability:** After approval of a proposal
